# Supplementary material for: Addressing Research Needs in the Field of Plant Virus Ecology by Defining Knowledge Gaps and Developing Wild Dicot Study Systems
Source: Front Microbiol. 2019 Jan 9;9:3305. doi: 10.3389/fmicb.2018.03305 (PMC6333650; doi:10.3389/fmicb.2018.03305)
Supplement: Supplementary file 5 [file Table_5.xlsx]

## Sheet: Supplementary Data Sheet 5
Supplementary Data Sheet 5: List of Primers
Primer name	Sequence (5'-3')	Target	Amplicon size (bp)	References
CABYV-CP-for	ATGAATACGGCCGCGGCTAGAAATC	Cucurbit aphid-borne yellows virus	600	S.-K. Choi and G.-S. Choi, 2016
CABYV-CP-Rev	CTATTTCGGGTTCTGGACCTGGCA
ToCV-CP-for	ATGGAGAACAGTGCCGTTGC	Tomato chlorosis virus	774	Segev et al., 2004
ToCV-CP-rev	TTAGCAACCAGTTATCGATGC
Endor-F	AAGSGAGAATWATHGTRTGGCA	Bell pepper endornavirus	381	Okada et al., 2011
Endor-R	CTAGWGCKGTBGTAGCTTGWCC
References:
S.-K. Choi and G.-S. Choi (2016) First Report of Cucurbit aphid-borne yellows virus in Cucumis melo in Korea, Plant Disease 100:1, 234
L. Segev, W. M. Wintermantel, J. E. Polston, and M. Lapidot (2004) First Report of Tomato chlorosis virus in Israel, Plant Disease 88:10, 1160
Okada R. , Kiyota E. , Sabanadzovic S. , Moriyama H. , Fukuhara T. , Saha P. , Roossinck M. J. , Severin A. , Valverde R. A. (2011) Bell pepper endornavirus: molecular and biological properties, and occurrence in the genus Capsicum . J Gen Virol 92, 2664–2673.
