# Supplementary material for: Addressing Research Needs in the Field of Plant Virus Ecology by Defining Knowledge Gaps and Developing Wild Dicot Study Systems
Source: Front Microbiol. 2019 Jan 9;9:3305. doi: 10.3389/fmicb.2018.03305 (PMC6333650; doi:10.3389/fmicb.2018.03305)
Supplement: Supplementary file 7 [file Table_7.xlsx]

## Sheet: mapping statistics
Supplementary Data Sheet 7: BlastN results from dsRNA library sequencing
Sample name	mapped reads to host genome	total reads	Percent mapped	Percent unmapped
MRCF1A	17005165	41350158	41.1248	58.8752
MRCF1B	5514958	16574421	33.2739	66.7261
MRCF1C	31629202	61398053	51.515	48.485
MRCF2A	22320251	40909016	54.5607	45.4393
MRCF2B	23773714	36759695	64.6733	35.3267
MRCF2C	33871289	46352316	73.0736	26.9264
MRCF3A	9879515	19818589	49.8497	50.1503
MRCF3B	18772619	34187192	54.9113	45.0887
MRCF3C	22015568	56916770	38.6803	61.3197
SSCF1A	7967958	33301380	23.9268	76.0732
SSCF1B	6226338	20251314	30.7454	69.2546
SSCF2A	7773961	24831026	31.3074	68.6926
SSCF2B	8772215	22744556	38.5684	61.4316
SSCF3A	10820046	16769915	64.5206	35.4794
SSCF3B	21220064	30715923	69.0849	30.9151
MRCP1	21030337	37004449	56.8319	43.1681
MRCP4	22198012	26650946	83.2916	16.7084
MRCP5	27901741	36399872	76.6534	23.3466
MRCP6	44126418	58134797	75.9036	24.0964
MRDW1B	2625613	22987164	11.4221	88.5779
MRDW2	3106838	25007803	12.4235	87.5765
SSDW1	2645482	17778414	14.8803	85.1197
SSDW2A	481370	14140327	3.40424	96.5958
SSDW2B	2694299	25133267	10.7201	89.2799
SSDW4	3209658	31488084	10.1932	89.8068
pepper-1 (Cucurbita maxima)	347278	11924127	2.9124	97.0876
pepper-1 (Solanum lycopersicum)	472152	11768530	4.01199	95.988
pepper-2 (Cucurbita maxima)	909922	9889711	9.20069	90.7993
pepper-2 (Solanum lycopersicum)	1075106	9455513	11.3701	88.6299
Note: Samples marked in red were also used to perform the pathway without host filtering.

## Sheet: MRCF2B without host filtering
Supplementary Data Sheet 7: BlastN results from dsRNA library sequencing
qseqid	sseqid	pident	length	mismatch	gapopen	qstart	qend	sstart	send	evalue	bitscore	sallseqid	score	nident	positive	gaps	ppos	qframe	sframe	qseq	sseq	qlen	slen	salltitles
TRINITY_DN137_c0_g1_i1	EU636992.1	96	225	9	0	2	226	763	987	1.34e-100	365	EU636992.1	404	216	216	0	96	1	1	TCATTCAAGATACCAAAATGCCCTCCCATACACTCGGTGTTACAGGTCCAATACAAAGATGGATCTCACGCTGGGTACGCTACCTGCGTAACGCTCTACAATGGAACGAACGGGCTTCTGACTGCCCATCACGTGGCTGTCCCAGGTAGCAAAATTGTCTCCACCAGGAATGGAAACAAGATCCCACTCTCTGAATTTAGATCAATCATGGAATCTGAAAATAGG	TCATTCAAGATACCACAAAGCCCTCCCAAACACTCGGTATTACAGGTCCAATACAAAGATGGATCTCATGCCGGGTACGCTACCTGCGTGACGCTCTACAATGGAACGAACGGGCTTCTGACTGCCCATCACGTGGCTGTCCCAGGTAGTAAAATTGTCTCCACCAGGAATGGAAACAAGATCCCACTCTCTGAATTTAGATCAATCATGGAATCTGAAAAGAGG	226	5682	EU636992.1 Cucurbit aphid-borne yellows virus from China: Xinjiang, complete genome
TRINITY_DN137_c0_g1_i1	KR231947.1	96	225	9	0	2	226	763	987	1.34e-100	365	KR231947.1	404	216	216	0	96	1	1	TCATTCAAGATACCAAAATGCCCTCCCATACACTCGGTGTTACAGGTCCAATACAAAGATGGATCTCACGCTGGGTACGCTACCTGCGTAACGCTCTACAATGGAACGAACGGGCTTCTGACTGCCCATCACGTGGCTGTCCCAGGTAGCAAAATTGTCTCCACCAGGAATGGAAACAAGATCCCACTCTCTGAATTTAGATCAATCATGGAATCTGAAAATAGG	TCATTCAAAATACCACAAAGCCCTCCCAAACACTCGGTATTACAGGTCCAATACAAAGATGGATCTCATGCCGGGTACGCTACCTGCGTGACGCTCTACAATGGAACGAACGGGCTTCTGACTGCCCATCACGTGGCTGTCCCAGGTAGCAAAATTGTCTCCACCAGGAATGGAAACAAGATCCCACTCTCTGAATTTAGATCAATCATGGAATCTGAAAAGAGG	226	5682	KR231947.1 Cucurbit aphid-borne yellows virus isolate GS1, complete genome
TRINITY_DN137_c0_g1_i1	GQ221224.1	95.556	225	10	0	2	226	763	987	1.63e-99	361	GQ221224.1	400	215	215	0	95.56	1	1	TCATTCAAGATACCAAAATGCCCTCCCATACACTCGGTGTTACAGGTCCAATACAAAGATGGATCTCACGCTGGGTACGCTACCTGCGTAACGCTCTACAATGGAACGAACGGGCTTCTGACTGCCCATCACGTGGCTGTCCCAGGTAGCAAAATTGTCTCCACCAGGAATGGAAACAAGATCCCACTCTCTGAATTTAGATCAATCATGGAATCTGAAAATAGG	TCATTCAAGATACCACAAAGCCCTCCCAAACACTCGGTATTACAGGTCCAATACAAAGATGGATCTCATGCCGGGTACGCCACCTGCGTGACGCTTTACAATGGAACGAACGGGCTTCTGACTGCCCATCACGTGGCTGTCCCAGGTAGCAAAATTGTCTCCACCAGGAATGGAAACAAGATCCCACTCTCTGAATTTAGATCAATCATGGAATCTGAAAAGAGG	226	5682	GQ221224.1 Cucurbit aphid-borne yellows virus isolate CABYV-JAN, complete genome
TRINITY_DN137_c0_g1_i1	KR231942.1	95.111	225	11	0	2	226	763	987	6.93e-98	356	KR231942.1	394	214	214	0	95.11	1	1	TCATTCAAGATACCAAAATGCCCTCCCATACACTCGGTGTTACAGGTCCAATACAAAGATGGATCTCACGCTGGGTACGCTACCTGCGTAACGCTCTACAATGGAACGAACGGGCTTCTGACTGCCCATCACGTGGCTGTCCCAGGTAGCAAAATTGTCTCCACCAGGAATGGAAACAAGATCCCACTCTCTGAATTTAGATCAATCATGGAATCTGAAAATAGG	TCATTCAAGATACCACAAAGCCCTCCCAAACACTCGGTATTACAGGTTCAATACAAAGATGGATCTCATGCCGGGTACGCTACCTGTGTGACGCTCTACAATGGAACGAACGGGCTTCTGACTGCCCATCACGTGGCTGTCCCAGGTAGCAAAATTGTCTCAACCAGGAATGGAAACAAGATCCCACTCTCTGAATTTAGATCAATCATGGAATCTGAAAAGAGG	226	5683	KR231942.1 Cucurbit aphid-borne yellows virus isolate CY3, complete genome
TRINITY_DN137_c0_g1_i1	KR231943.1	94.667	225	12	0	2	226	763	987	8.44e-97	352	KR231943.1	390	213	213	0	94.67	1	1	TCATTCAAGATACCAAAATGCCCTCCCATACACTCGGTGTTACAGGTCCAATACAAAGATGGATCTCACGCTGGGTACGCTACCTGCGTAACGCTCTACAATGGAACGAACGGGCTTCTGACTGCCCATCACGTGGCTGTCCCAGGTAGCAAAATTGTCTCCACCAGGAATGGAAACAAGATCCCACTCTCTGAATTTAGATCAATCATGGAATCTGAAAATAGG	TCATTCAAGATACCACAAAGCCCTCCCAAACGCTCGGTGTTACAGGTTCAATACAAAGATGGATCTCATGCCGGGTACGCTACCTGTGTGACGCTCTACAATGGAACGAACGGGCTTCTGACTGCCCATCACGTGGCTGTCCCAGGTAGCAAAATTGTCTCAACCAGGAATGGAAACAAGATCCCACTCTCTGAATTTAGATCAATCATGGAATCCGAAAAGAGG	226	5682	KR231943.1 Cucurbit aphid-borne yellows virus isolate CY4, complete genome
TRINITY_DN137_c0_g1_i1	KR231945.1	94.667	225	12	0	2	226	763	987	8.44e-97	352	KR231945.1	390	213	213	0	94.67	1	1	TCATTCAAGATACCAAAATGCCCTCCCATACACTCGGTGTTACAGGTCCAATACAAAGATGGATCTCACGCTGGGTACGCTACCTGCGTAACGCTCTACAATGGAACGAACGGGCTTCTGACTGCCCATCACGTGGCTGTCCCAGGTAGCAAAATTGTCTCCACCAGGAATGGAAACAAGATCCCACTCTCTGAATTTAGATCAATCATGGAATCTGAAAATAGG	TCATTCAAGATACCACAAAGCCCTCCCAAACACTCGGTGTTGCAGGTTCAATACAAAGATGGATCTCATGCCGGGTACGCTACCTGTGTGACGCTCTACAATGGAACGAACGGGCTTCTGACTGCCCATCACGTGGCTGTCCCAGGTAGCAAAATTGTCTCAACCAGGAATGGAAACAAGATCCCACTCTCTGAATTTAGATCAATCATGGAATCCGAAAAGAGG	226	5683	KR231945.1 Cucurbit aphid-borne yellows virus isolate GM7, complete genome
TRINITY_DN137_c0_g1_i1	KR231946.1	94.667	225	12	0	2	226	763	987	8.44e-97	352	KR231946.1	390	213	213	0	94.67	1	1	TCATTCAAGATACCAAAATGCCCTCCCATACACTCGGTGTTACAGGTCCAATACAAAGATGGATCTCACGCTGGGTACGCTACCTGCGTAACGCTCTACAATGGAACGAACGGGCTTCTGACTGCCCATCACGTGGCTGTCCCAGGTAGCAAAATTGTCTCCACCAGGAATGGAAACAAGATCCCACTCTCTGAATTTAGATCAATCATGGAATCTGAAAATAGG	TCATTCAAAATACCACAAAGCCCTCCCAAACACTCGGTATTACAGGTCCAATACAAAGATGGATCTCATGCCGGGTATGCTACCTGCGTGACGCTCTACAATGGAACGAACGGGCTTTTGACTGCCCATCACGTGGCTGTCCCAGGTAGTAAAATTGTCTCCACCAGGAATGGAAACAAGATCCCACTCTCTGAATTTAGATCAATCATGGAATCTGAAAAGAGG	226	5681	KR231946.1 Cucurbit aphid-borne yellows virus isolate GM16, complete genome
TRINITY_DN137_c0_g1_i1	KR231948.1	94.667	225	12	0	2	226	763	987	8.44e-97	352	KR231948.1	390	213	213	0	94.67	1	1	TCATTCAAGATACCAAAATGCCCTCCCATACACTCGGTGTTACAGGTCCAATACAAAGATGGATCTCACGCTGGGTACGCTACCTGCGTAACGCTCTACAATGGAACGAACGGGCTTCTGACTGCCCATCACGTGGCTGTCCCAGGTAGCAAAATTGTCTCCACCAGGAATGGAAACAAGATCCCACTCTCTGAATTTAGATCAATCATGGAATCTGAAAATAGG	TCATTCAAAATACCACAAAGCCCTCCCAAACACTCGGTATTACAGGTCCAATACAAAGATGGATCTCATGCCGGGTATGCTACCTGTGTGACGCTCTACAATGGAACGAACGGGCTTCTGACTGCCCATCACGTGGCTGTCCCAGGTAGTAAAATTGTCTCCACCAGGAATGGAAACAAGATCCCACTCTCTGAATTTAGATCAATCATGGAATCTGAAAAGAGG	226	5683	KR231948.1 Cucurbit aphid-borne yellows virus isolate GS2, complete genome
TRINITY_DN137_c0_g1_i1	KR231950.1	94.667	225	12	0	2	226	763	987	8.44e-97	352	KR231950.1	390	213	213	0	94.67	1	1	TCATTCAAGATACCAAAATGCCCTCCCATACACTCGGTGTTACAGGTCCAATACAAAGATGGATCTCACGCTGGGTACGCTACCTGCGTAACGCTCTACAATGGAACGAACGGGCTTCTGACTGCCCATCACGTGGCTGTCCCAGGTAGCAAAATTGTCTCCACCAGGAATGGAAACAAGATCCCACTCTCTGAATTTAGATCAATCATGGAATCTGAAAATAGG	TCATTTAAGATACCACAAAGCCCTCCCAAACACTCGGTATTACAGGTCCAATACAAAGATGGATCTCATGCCGGGTACGCTACCTGCGTGGCGCTTTACAATGGAACGAATGGGCTTCTGACTGCCCATCACGTGGCTGTCCCAGGTAGCAAAATTGTCTCCACCAGGAATGGAAACAAGATCCCACTCTCTGAATTTAGATCAATCATGGAATCTGAAAAGAGG	226	5680	KR231950.1 Cucurbit aphid-borne yellows virus isolate HD1, complete genome
TRINITY_DN137_c0_g1_i1	KR231951.1	94.667	225	12	0	2	226	763	987	8.44e-97	352	KR231951.1	390	213	213	0	94.67	1	1	TCATTCAAGATACCAAAATGCCCTCCCATACACTCGGTGTTACAGGTCCAATACAAAGATGGATCTCACGCTGGGTACGCTACCTGCGTAACGCTCTACAATGGAACGAACGGGCTTCTGACTGCCCATCACGTGGCTGTCCCAGGTAGCAAAATTGTCTCCACCAGGAATGGAAACAAGATCCCACTCTCTGAATTTAGATCAATCATGGAATCTGAAAATAGG	TCATTTAAGATACCACAAAGCCCTCCCAAACACTCGGTATTACAGGTCCAATACAAAGATGGATCTCATGCCGGGTACGCTACCTGCGTGGCGCTTTACAATGGAACGAATGGGCTTCTGACTGCCCATCACGTGGCTGTCCCAGGTAGCAAAATTGTCTCCACCAGGAATGGAAACAAGATCCCACTCTCTGAATTTAGATCAATCATGGAATCTGAAAAGAGG	226	5683	KR231951.1 Cucurbit aphid-borne yellows virus isolate HD118, complete genome
TRINITY_DN137_c0_g1_i1	KR231952.1	94.667	225	12	0	2	226	763	987	8.44e-97	352	KR231952.1	390	213	213	0	94.67	1	1	TCATTCAAGATACCAAAATGCCCTCCCATACACTCGGTGTTACAGGTCCAATACAAAGATGGATCTCACGCTGGGTACGCTACCTGCGTAACGCTCTACAATGGAACGAACGGGCTTCTGACTGCCCATCACGTGGCTGTCCCAGGTAGCAAAATTGTCTCCACCAGGAATGGAAACAAGATCCCACTCTCTGAATTTAGATCAATCATGGAATCTGAAAATAGG	TCATTCAAGATACCACAAAGCCCTCCCAAACACTCGGTGTTACAGGTTCAATACAAAGATGGATCTCATGCCGGGTACGCTACCTGCGTGACGCTCTACAATGGAACGAATGGGCTTCTGACTGCCCATCACGTAGCTGTCCCAGGTAGCAAAATTGTCTCAACCAGAAATGGAAACAAGATCCCACTCTCTGAATTTAGATCAATCATGGAATCTGAAAAGAGG	226	5682	KR231952.1 Cucurbit aphid-borne yellows virus isolate HS1, complete genome
TRINITY_DN137_c0_g1_i1	KR231954.1	94.667	225	12	0	2	226	763	987	8.44e-97	352	KR231954.1	390	213	213	0	94.67	1	1	TCATTCAAGATACCAAAATGCCCTCCCATACACTCGGTGTTACAGGTCCAATACAAAGATGGATCTCACGCTGGGTACGCTACCTGCGTAACGCTCTACAATGGAACGAACGGGCTTCTGACTGCCCATCACGTGGCTGTCCCAGGTAGCAAAATTGTCTCCACCAGGAATGGAAACAAGATCCCACTCTCTGAATTTAGATCAATCATGGAATCTGAAAATAGG	TCATTCAAGATACCACAAAGCCCTCCCAAACACTCGGTGTTACAGGTTCAATACAAAGATGGATCTCATGCCGGGTATGCTACCTGTGTGACGCTCTACAATGGAACGAACGGGCTTCTGACTGCCCATCACGTGGCTGTCCCAGGTAGCAAAATTGTCTCGACCAGGAATGGAAACAAGATCCCACTCTCTGAATTTAGATCAATCATGGAATCCGAAAAGAGG	226	5683	KR231954.1 Cucurbit aphid-borne yellows virus isolate NW1, complete genome
TRINITY_DN137_c0_g1_i1	KR231955.1	94.667	225	12	0	2	226	763	987	8.44e-97	352	KR231955.1	390	213	213	0	94.67	1	1	TCATTCAAGATACCAAAATGCCCTCCCATACACTCGGTGTTACAGGTCCAATACAAAGATGGATCTCACGCTGGGTACGCTACCTGCGTAACGCTCTACAATGGAACGAACGGGCTTCTGACTGCCCATCACGTGGCTGTCCCAGGTAGCAAAATTGTCTCCACCAGGAATGGAAACAAGATCCCACTCTCTGAATTTAGATCAATCATGGAATCTGAAAATAGG	TCATTCAAGATACCGCAAAGCCCTCCCAAACACTCGGTGTTACAGGTTCAATACAAAGATGGATCTCATGCCGGGTACGCTACCTGTGTGACGCTCTACAATGGAACGAACGGGCTTCTGACTGCCCATCACGTGGCTGTCCCAGGTAGCAAAATTGTCTCAACCAGGAATGGAAACAAGATCCCACTCTCTGAATTTAGATCAATCATGGAATCCGAAAAGAGG	226	5682	KR231955.1 Cucurbit aphid-borne yellows virus isolate NW2, complete genome
TRINITY_DN137_c0_g1_i1	KR231956.1	94.667	225	12	0	2	226	763	987	8.44e-97	352	KR231956.1	390	213	213	0	94.67	1	1	TCATTCAAGATACCAAAATGCCCTCCCATACACTCGGTGTTACAGGTCCAATACAAAGATGGATCTCACGCTGGGTACGCTACCTGCGTAACGCTCTACAATGGAACGAACGGGCTTCTGACTGCCCATCACGTGGCTGTCCCAGGTAGCAAAATTGTCTCCACCAGGAATGGAAACAAGATCCCACTCTCTGAATTTAGATCAATCATGGAATCTGAAAATAGG	TCATTCAAAATACCACAAAGCCCTCCCAAACACTCGGTATTACAGGTCCAATACAAAGATGGATCTCATGCCGGGTATGCTACCTGTGTGACGCTCTACAATGGAACGAACGGGCTTCTGACTGCCCATCACGTGGCTGTCCCAGGTAGTAAAATTGTCTCCACCAGGAATGGAAACAAGATCCCACTCTCTGAATTTAGATCAATCATGGAATCTGAAAAGAGG	226	5683	KR231956.1 Cucurbit aphid-borne yellows virus isolate NW2(14), complete genome
TRINITY_DN137_c0_g1_i1	KR231958.1	94.667	225	12	0	2	226	763	987	8.44e-97	352	KR231958.1	390	213	213	0	94.67	1	1	TCATTCAAGATACCAAAATGCCCTCCCATACACTCGGTGTTACAGGTCCAATACAAAGATGGATCTCACGCTGGGTACGCTACCTGCGTAACGCTCTACAATGGAACGAACGGGCTTCTGACTGCCCATCACGTGGCTGTCCCAGGTAGCAAAATTGTCTCCACCAGGAATGGAAACAAGATCCCACTCTCTGAATTTAGATCAATCATGGAATCTGAAAATAGG	TCATTCAAGATACCACAAAGCCCTCCCAAACACTCGGTGTTACAGGTTCAATACAAAGATGGATCTCATGCCGGGTATGCTACCTGTGTGACGCTCTACAATGGAACGAACGGGCTTCTGACTGCCCATCACGTGGCTGTCCCAGGTAGCAAAATTGTCTCGACCAGGAATGGAAACAAGATCCCACTCTCTGAATTTAGATCAATCATGGAATCCGAAAAGAGG	226	5683	KR231958.1 Cucurbit aphid-borne yellows virus isolate NW18, complete genome
TRINITY_DN137_c0_g1_i1	KR231960.1	94.667	225	12	0	2	226	763	987	8.44e-97	352	KR231960.1	390	213	213	0	94.67	1	1	TCATTCAAGATACCAAAATGCCCTCCCATACACTCGGTGTTACAGGTCCAATACAAAGATGGATCTCACGCTGGGTACGCTACCTGCGTAACGCTCTACAATGGAACGAACGGGCTTCTGACTGCCCATCACGTGGCTGTCCCAGGTAGCAAAATTGTCTCCACCAGGAATGGAAACAAGATCCCACTCTCTGAATTTAGATCAATCATGGAATCTGAAAATAGG	TCATTCAAGATACCACAAAGCCCTCCCAAACACTCGGTATTACAGGTTCAATACAAAGATGGATCTCATGCCGGGTACGCTACCTGTGTGACGCTCTACAATGGAACGAACGGGCTTCTGACTGCCCATCACGTGGCTGTCCCAGGTAGCAAAATTGTCTCAACCAGGAATGGAAACAAGATCCCACTCTCTGAATTTAGATCAATCATGGAATCCGAAAAGAGG	226	5682	KR231960.1 Cucurbit aphid-borne yellows virus isolate SW1(14), complete genome
TRINITY_DN137_c0_g1_i1	KR231962.1	94.667	225	12	0	2	226	763	987	8.44e-97	352	KR231962.1	390	213	213	0	94.67	1	1	TCATTCAAGATACCAAAATGCCCTCCCATACACTCGGTGTTACAGGTCCAATACAAAGATGGATCTCACGCTGGGTACGCTACCTGCGTAACGCTCTACAATGGAACGAACGGGCTTCTGACTGCCCATCACGTGGCTGTCCCAGGTAGCAAAATTGTCTCCACCAGGAATGGAAACAAGATCCCACTCTCTGAATTTAGATCAATCATGGAATCTGAAAATAGG	TCATTCAAGATACCACAAAGCCCTCCCAAACACTCGGTATTACAGGTTCAATACAAAGATGGATCTCATGCCGGGTACGCTACCTGTGTGACGCTCTACAATGGAACGAACGGGCTTCTGACTGCCCATCACGTGGCTGTCCCAGGTAGCAAAATTGTCTCAACCAGGAATGGAAACAAGATCCCACTCTCTGAATTTAGATCAATCATGGAATCCGAAAAGAGG	226	5682	KR231962.1 Cucurbit aphid-borne yellows virus isolate SW25, complete genome
TRINITY_DN137_c0_g1_i1	LC082306.1	94.222	225	13	0	2	226	763	987	3.59e-95	347	LC082306.1	384	212	212	0	94.22	1	1	TCATTCAAGATACCAAAATGCCCTCCCATACACTCGGTGTTACAGGTCCAATACAAAGATGGATCTCACGCTGGGTACGCTACCTGCGTAACGCTCTACAATGGAACGAACGGGCTTCTGACTGCCCATCACGTGGCTGTCCCAGGTAGCAAAATTGTCTCCACCAGGAATGGAAACAAGATCCCACTCTCTGAATTTAGATCAATCATGGAATCTGAAAATAGG	TCATTCAAAATACCACAAAGCCCTCCCAAACACTCGGTATTACAGGTCCAATACAAAGATGGATCTCATGCCGGGTATGCTACCTGTGTGACGCTCTACAATGGAACGAACGGGCTTCTGACTGCCCATCACGTGGCTGTCCCAGGTAGTAAAATTGTCTCCACCAGGAATGGAAACAAGATCCCACTCTCTGAATTTAGATCAATCATGGAATCTGAGAAGAGG	226	5688	LC082306.1 Cucurbit aphid-borne yellows virus genomic RNA, complete genome, isolate: K1
TRINITY_DN137_c0_g1_i1	KR231944.1	94.222	225	13	0	2	226	763	987	3.59e-95	347	KR231944.1	384	212	212	0	94.22	1	1	TCATTCAAGATACCAAAATGCCCTCCCATACACTCGGTGTTACAGGTCCAATACAAAGATGGATCTCACGCTGGGTACGCTACCTGCGTAACGCTCTACAATGGAACGAACGGGCTTCTGACTGCCCATCACGTGGCTGTCCCAGGTAGCAAAATTGTCTCCACCAGGAATGGAAACAAGATCCCACTCTCTGAATTTAGATCAATCATGGAATCTGAAAATAGG	TCATTCAAAATACCACAAAGCCCTCCCAAACACTCGGTATTGCAGGTCCAATACAAAGATGGATCTCATGCCGGGTATGCTACCTGTGTGACGCTCTACAATGGAACGAACGGGCTTCTGACTGCCCATCACGTGGCTGTCCCAGGTAGTAAAATTGTCTCCACCAGGAATGGAAACAAGATCCCACTCTCTGAATTTAGATCAATCATGGAATCTGAAAAGAGG	226	5684	KR231944.1 Cucurbit aphid-borne yellows virus isolate CY6, complete genome
TRINITY_DN137_c0_g1_i1	KR231953.1	94.222	225	13	0	2	226	763	987	3.59e-95	347	KR231953.1	384	212	212	0	94.22	1	1	TCATTCAAGATACCAAAATGCCCTCCCATACACTCGGTGTTACAGGTCCAATACAAAGATGGATCTCACGCTGGGTACGCTACCTGCGTAACGCTCTACAATGGAACGAACGGGCTTCTGACTGCCCATCACGTGGCTGTCCCAGGTAGCAAAATTGTCTCCACCAGGAATGGAAACAAGATCCCACTCTCTGAATTTAGATCAATCATGGAATCTGAAAATAGG	TCATTCAAGATACCACAAAGCCCTCCCAAACACTCGGTATTACAGGTTCAATACAAAGATGGATCTCATGCCGGGTACGCTACCTGTGTGACGCTCTACAACGGAACGAACGGGCTTCTGACTGCCCATCACGTGGCTGTCCCAGGTAGCAAAATTGTCTCAACCAGGAATGGAAACAAGATCCCACTCTCTGAATTTAGATCAATCATGGAATCCGAAAAGAGG	226	5682	KR231953.1 Cucurbit aphid-borne yellows virus isolate HS2, complete genome
TRINITY_DN137_c0_g1_i1	KR231957.1	94.222	225	13	0	2	226	763	987	3.59e-95	347	KR231957.1	384	212	212	0	94.22	1	1	TCATTCAAGATACCAAAATGCCCTCCCATACACTCGGTGTTACAGGTCCAATACAAAGATGGATCTCACGCTGGGTACGCTACCTGCGTAACGCTCTACAATGGAACGAACGGGCTTCTGACTGCCCATCACGTGGCTGTCCCAGGTAGCAAAATTGTCTCCACCAGGAATGGAAACAAGATCCCACTCTCTGAATTTAGATCAATCATGGAATCTGAAAATAGG	TCATTCAAAATACCACAAAGCCCCCCCAAACACTCGGTATTACAGGTCCAATACAAAGATGGATCTCATGCCGGGTATGCTACCTGTGTGACGCTCTACAATGGAACGAACGGGCTTCTGACTGCCCATCACGTGGCTGTCCCAGGTAGTAAAATTGTCTCCACCAGGAATGGAAACAAGATCCCACTCTCTGAATTTAGATCAATCATGGAATCTGAAAAGAGG	226	5683	KR231957.1 Cucurbit aphid-borne yellows virus isolate NW5, complete genome
TRINITY_DN137_c0_g1_i1	KR231963.1	94.222	225	13	0	2	226	763	987	3.59e-95	347	KR231963.1	384	212	212	0	94.22	1	1	TCATTCAAGATACCAAAATGCCCTCCCATACACTCGGTGTTACAGGTCCAATACAAAGATGGATCTCACGCTGGGTACGCTACCTGCGTAACGCTCTACAATGGAACGAACGGGCTTCTGACTGCCCATCACGTGGCTGTCCCAGGTAGCAAAATTGTCTCCACCAGGAATGGAAACAAGATCCCACTCTCTGAATTTAGATCAATCATGGAATCTGAAAATAGG	TCATTCAAGATACCACAAAGCCCTCCCAAACACTCGGTATTACAGGTTCAATACAAAGATGGATCTCATGCCGGGTACGCTACCTGTGTGACGCTCTACAATGGAACGAACGGGCTTCTGACTGCCCATCACGTGGCTGTCCCAGGTAGCAAAATTGTCTCAACCAGGAATGGAAACAAGATCCCACTTTCTGAATTTAGATCAATCATGGAATCCGAAAAGAGG	226	5681	KR231963.1 Cucurbit aphid-borne yellows virus isolate SW64, complete genome
TRINITY_DN137_c0_g1_i1	KR231949.1	93.778	225	14	0	2	226	763	987	4.37e-94	343	KR231949.1	380	211	211	0	93.78	1	1	TCATTCAAGATACCAAAATGCCCTCCCATACACTCGGTGTTACAGGTCCAATACAAAGATGGATCTCACGCTGGGTACGCTACCTGCGTAACGCTCTACAATGGAACGAACGGGCTTCTGACTGCCCATCACGTGGCTGTCCCAGGTAGCAAAATTGTCTCCACCAGGAATGGAAACAAGATCCCACTCTCTGAATTTAGATCAATCATGGAATCTGAAAATAGG	TCATTCAAAATACCACAAAGCCCTCCCAAACACTCGGTATTGCAGGTCCAATACAAAGATGGATCTCATGCCGGGTATGCTACCTGTGTGACGCCCTACAATGGAACGAACGGGCTTCTGACTGCCCATCACGTGGCTGTCCCAGGTAGTAAAATTGTCTCCACCAGGAATGGAAACAAGATCCCACTCTCTGAATTTAGATCAATCATGGAATCTGAAAAGAGG	226	5682	KR231949.1 Cucurbit aphid-borne yellows virus isolate GS6, complete genome
TRINITY_DN137_c0_g1_i1	KR231959.1	93.778	225	14	0	2	226	763	987	4.37e-94	343	KR231959.1	380	211	211	0	93.78	1	1	TCATTCAAGATACCAAAATGCCCTCCCATACACTCGGTGTTACAGGTCCAATACAAAGATGGATCTCACGCTGGGTACGCTACCTGCGTAACGCTCTACAATGGAACGAACGGGCTTCTGACTGCCCATCACGTGGCTGTCCCAGGTAGCAAAATTGTCTCCACCAGGAATGGAAACAAGATCCCACTCTCTGAATTTAGATCAATCATGGAATCTGAAAATAGG	TCATTCAAGATACCACAAAGCCCTCCCAAACACTCGGTATTGCAGGTTCAATACAAAGATGGATCCCATGCCGGGTACGCTACCTGTGTGACGCTCTACAATGGAACGAATGGGCTTCTGACTGCCCATCACGTGGCTGTCCCAGGTAGCAAAATTGTCTCAACCAGGAATGGAAACAAGATCCCACTCTCTGAATTTAGATCAATCATGGAATCTGAAAAGAGG	226	5683	KR231959.1 Cucurbit aphid-borne yellows virus isolate SW1, complete genome
TRINITY_DN137_c0_g1_i1	KR231961.1	93.778	225	14	0	2	226	763	987	4.37e-94	343	KR231961.1	380	211	211	0	93.78	1	1	TCATTCAAGATACCAAAATGCCCTCCCATACACTCGGTGTTACAGGTCCAATACAAAGATGGATCTCACGCTGGGTACGCTACCTGCGTAACGCTCTACAATGGAACGAACGGGCTTCTGACTGCCCATCACGTGGCTGTCCCAGGTAGCAAAATTGTCTCCACCAGGAATGGAAACAAGATCCCACTCTCTGAATTTAGATCAATCATGGAATCTGAAAATAGG	TCATTCAAGATACCACAAAGCCCTCCCAAACACTCGGTATTGCAGGTTCAATACAAAGATGGATCCCATGCCGGGTACGCTACCTGTGTGACGCTCTACAATGGAACGAATGGGCTTCTGACTGCCCATCACGTGGCTGTCCCAGGTAGCAAAATTGTCTCAACCAGGAATGGAAACAAGATCCCACTCTCTGAATTTAGATCAATCATGGAATCTGAAAAGAGG	226	5683	KR231961.1 Cucurbit aphid-borne yellows virus isolate SW2, complete genome
TRINITY_DN137_c0_g1_i1	GQ221223.1	92.444	225	17	0	2	226	763	987	9.63e-90	329	GQ221223.1	364	208	208	0	92.44	1	1	TCATTCAAGATACCAAAATGCCCTCCCATACACTCGGTGTTACAGGTCCAATACAAAGATGGATCTCACGCTGGGTACGCTACCTGCGTAACGCTCTACAATGGAACGAACGGGCTTCTGACTGCCCATCACGTGGCTGTCCCAGGTAGCAAAATTGTCTCCACCAGGAATGGAAACAAGATCCCACTCTCTGAATTTAGATCAATCATGGAATCTGAAAATAGG	TCATTCAAAATACCACAGAGCCCTCCCAAACACTCGGTTTTACAGGTCCAATATAAAGATGGATCCCACGCCGGGTATGCTACCTGTGTGACGCTTTACAATGGAACGAACGGGCTTCTGACTGCCCATCACGTAGCTGTCCCAGGTAGCAAAATTGTCTCCACCAGGAATGGAAACAAGATCCCACTTTCCGAATTTAGATCAATCATGGAATCTGAAAAGAGG	226	5682	GQ221223.1 Cucurbit aphid-borne yellows virus isolate CABYV-FJ, complete genome
TRINITY_DN137_c0_g1_i1	EU000535.1	89.333	225	24	0	2	226	763	987	1.63e-80	298	EU000535.1	330	201	201	0	89.33	1	1	TCATTCAAGATACCAAAATGCCCTCCCATACACTCGGTGTTACAGGTCCAATACAAAGATGGATCTCACGCTGGGTACGCTACCTGCGTAACGCTCTACAATGGAACGAACGGGCTTCTGACTGCCCATCACGTGGCTGTCCCAGGTAGCAAAATTGTCTCCACCAGGAATGGAAACAAGATCCCACTCTCTGAATTTAGATCAATCATGGAATCTGAAAATAGG	TCATTCAAAATACCACAGAGCCCTCCCAAACACTCGGTTTTGCAGATTCAATATAAAGATGGATCTCATGCCGGGTATGCTACCTGCGTGAAGCTTTACAATGGAACAAATGGGCTTCTGACTGCCTATCACGTGGCAGTCCCAGGTAGCAAAATCGTCTCCACCAGGAATGGAAACAAGATCCCACTCTCTGAGTTCAGATCAATCATGGAATCTGAAAAGAGG	226	5682	EU000535.1 Cucurbit aphid-borne yellows virus, complete genome
TRINITY_DN137_c0_g1_i1	JQ700305.1	86.239	218	30	0	8	225	766	983	1.43e-68	259	JQ700305.1	286	188	188	0	86.24	1	1	AAGATACCAAAATGCCCTCCCATACACTCGGTGTTACAGGTCCAATACAAAGATGGATCTCACGCTGGGTACGCTACCTGCGTAACGCTCTACAATGGAACGAACGGGCTTCTGACTGCCCATCACGTGGCTGTCCCAGGTAGCAAAATTGTCTCCACCAGGAATGGAAACAAGATCCCACTCTCTGAATTTAGATCAATCATGGAATCTGAAAATAG	AACATCCCACAGAGCCCTCCCAAGAACTCGGTCTTGCAGGTCCAATACAAAGATGGATCTCACGCCGGGTATGCTACCTGCGTCACGCTCTATGATGGAACAAATGGGCTTCTAACTGCCCACCACGTAGCAGTCCCAGGTAGCAAAATCGTCTCCACCAGGAACGGAAACAAGATCCCTCTCAGTGAATTCAGATCTATCATGGAATCCGAAAAGAG	226	5670	JQ700305.1 Cucurbit aphid-borne yellows virus isolate CABYV-C-TW20, complete genome
TRINITY_DN137_c0_g1_i1	JF939814.1	84.444	225	35	0	2	226	760	984	2.59e-65	248	JF939814.1	274	190	190	0	84.44	1	1	TCATTCAAGATACCAAAATGCCCTCCCATACACTCGGTGTTACAGGTCCAATACAAAGATGGATCTCACGCTGGGTACGCTACCTGCGTAACGCTCTACAATGGAACGAACGGGCTTCTGACTGCCCATCACGTGGCTGTCCCAGGTAGCAAAATTGTCTCCACCAGGAATGGAAACAAGATCCCACTCTCTGAATTTAGATCAATCATGGAATCTGAAAATAGG	TCATTCAAGATACCACAAAATCCCCCCAAAAACTCGGTTTTGCAGGTCCAATACAAAGACGGATCGCATGCCGGGTATGCTACCTGTGTGACGCTGTACAATGGAACAAATGGGCTTCTTACAGCCTATCACGTCGCTGTCCCAGGTAGCAAAGTCGTCTCCACCAGGAACGGAAGTAAGATTCCCCTCTCTGAGTTCAGATCCATCATGGAGTCTGAAAAGAGG	226	5672	JF939814.1 Cucurbit aphid-borne yellows virus strain Sq/2004/1.9, complete genome
TRINITY_DN137_c0_g1_i1	KY617826.1	83.482	224	37	0	2	225	754	977	4.67e-62	237	KY617826.1	262	187	187	0	83.48	1	1	TCATTCAAGATACCAAAATGCCCTCCCATACACTCGGTGTTACAGGTCCAATACAAAGATGGATCTCACGCTGGGTACGCTACCTGCGTAACGCTCTACAATGGAACGAACGGGCTTCTGACTGCCCATCACGTGGCTGTCCCAGGTAGCAAAATTGTCTCCACCAGGAATGGAAACAAGATCCCACTCTCTGAATTTAGATCAATCATGGAATCTGAAAATAG	TCATTTAAAATTCCACAGAGCCCGCCGAGAAACTCGGTCTTGCAGGTCCAATATAAAGATGGATCGCACGCCGGGTACGCTACCTGTGTAACGCTTTATAATGGAATAAACGGATTGTTGACAGCTCACCATGTGGCTGTCCCAGGTAGCAAAGTTGTCTCCACCAGGAACGGAAACAAGATCCCACTCTCCGAGTTTAGATCGGTTATGGAATCAGAAAAGAG	226	5677	KY617826.1 Cucurbit aphid-borne yellows virus, partial genome
TRINITY_DN137_c0_g1_i1	NC_003688.1	83.111	225	38	0	2	226	760	984	1.63e-61	235	NC_003688.1	260	187	187	0	83.11	1	1	TCATTCAAGATACCAAAATGCCCTCCCATACACTCGGTGTTACAGGTCCAATACAAAGATGGATCTCACGCTGGGTACGCTACCTGCGTAACGCTCTACAATGGAACGAACGGGCTTCTGACTGCCCATCACGTGGCTGTCCCAGGTAGCAAAATTGTCTCCACCAGGAATGGAAACAAGATCCCACTCTCTGAATTTAGATCAATCATGGAATCTGAAAATAGG	TCATTCAAAATTCCACAGAACCCCCCCAAAAACTCGGTCTTGCAGGTCCAATATAAGGACGGATCGCATGCCGGGTATGCTACTTGTGTGACGCTGTACAATGGAACGAATGGGCTTCTCACGGCCTATCATGTCGCTGTCCCAGGTAGCAAAGTCGTCTCCACCAGGAACGGAAACAAGGTTCCTCTCTCTGAATTCAGATCCATTATGGAATCTGAAAAGAGG	226	5669	NC_003688.1 Cucurbit aphid-borne yellows virus, complete genome
TRINITY_DN137_c0_g1_i1	JF939812.1	82.222	225	40	0	2	226	760	984	8.45e-59	226	JF939812.1	250	185	185	0	82.22	1	1	TCATTCAAGATACCAAAATGCCCTCCCATACACTCGGTGTTACAGGTCCAATACAAAGATGGATCTCACGCTGGGTACGCTACCTGCGTAACGCTCTACAATGGAACGAACGGGCTTCTGACTGCCCATCACGTGGCTGTCCCAGGTAGCAAAATTGTCTCCACCAGGAATGGAAACAAGATCCCACTCTCTGAATTTAGATCAATCATGGAATCTGAAAATAGG	TCATTCAAGATACCACAGAATCCCCCTAAAAACTCAGTTTTGCAGGTCCAATATAAAGACGGATCGCATGCCGGGTATGCTACCTGTGTGACGCTGTACAATGGAACAAATGGGCTTCTCACAGCCTATCACGTCGCTGTCCCAGGTAGCAAAGTCGTCTCCACCAGGAACGGAAGTAAGATTCCCCTCTCTGAGTTCAGATCCATTATGGAGTCTGAAAAGAGG	226	5672	JF939812.1 Cucurbit aphid-borne yellows virus strain Sq/2003/7.2, complete genome
TRINITY_DN137_c0_g1_i1	JF939813.1	82.353	221	39	0	2	222	763	983	1.03e-57	223	JF939813.1	246	182	182	0	82.35	1	1	TCATTCAAGATACCAAAATGCCCTCCCATACACTCGGTGTTACAGGTCCAATACAAAGATGGATCTCACGCTGGGTACGCTACCTGCGTAACGCTCTACAATGGAACGAACGGGCTTCTGACTGCCCATCACGTGGCTGTCCCAGGTAGCAAAATTGTCTCCACCAGGAATGGAAACAAGATCCCACTCTCTGAATTTAGATCAATCATGGAATCTGAAAA	TCATTCAAAATCCCACAGAGCCCTCCTAAACACTCGGTCTTGCAAGTCCAATATGAGGATGGATCGCATGCCGGGTATGCTACCTGCGTGACTCTATACAATGGAACAAATGGGCTTCTTACAGCTTATCATGTTGCAGCCCCAGGTAGCAAGATAGTCTCCACCAGGAACGGAAACAAGATCCCCCTATCTGAATTCAGATCTATTATGGAATCTGAGAA	226	5675	JF939813.1 Cucurbit aphid-borne yellows virus strain Sq/2005/9.2, complete genome
TRINITY_DN137_c0_g1_i1	EU636991.1	73	200	48	2	2	198	768	964	3.84e-25	114	EU636991.1	126	146	146	6	73	1	1	TCATTCAAGATACCAAAATGCCCTCCCATACACTCGGTGTTACAGGTCCAATACAAAGATGGATCTCACGCTGGGTACGCTACCTGCGTAACGCTCTACAATGGAACGAACGGGCTTCTGACTGCCCATCACGTGGCTGTCCCA---GGTAGCAAAATTGTCTCCACCAGGAATGGAAACAAGATCCCACTCTCTGAATT	TCCTTCAAGATACCACAGTCTCCTCCCAAACACAGTGTGCTCCAAGTGCAACACCCGGATGGGTCCCACGCTGGCTACGCCACATGCGTGATGCTTTACAATGGAACAACAGGGCTTTTGACCGCCCGACACGT---TGTCTCATCCGGATGCAAGGTCACGTCGACGAGGAATGGCAACAAGATTCCTCTGTCTGAGTT	226	5668	EU636991.1 Beet western yellows virus from China: Inner Mongolia, complete genome
TRINITY_DN137_c0_g1_i1	EU636990.1	72.772	202	49	2	2	200	768	966	1.34e-24	113	EU636990.1	124	147	147	6	72.77	1	1	TCATTCAAGATACCAAAATGCCCTCCCATACACTCGGTGTTACAGGTCCAATACAAAGATGGATCTCACGCTGGGTACGCTACCTGCGTAACGCTCTACAATGGAACGAACGGGCTTCTGACTGCCCATCACGTGGCTGTCCCA---GGTAGCAAAATTGTCTCCACCAGGAATGGAAACAAGATCCCACTCTCTGAATTTA	TCTTTCAAGATACCACAGTCTCCCCCCAAACACAGTGTGCTCCAAGTGCAACACCCGGATGGGTCCCACGCTGGCTACGCCAAATGCGTGATGCTTTACAATGGAACAACAGGGCTTTTGACCGCCCGACACGT---TGTCTCATCCGGATGCAAGGTTACGTCGACGAGGAATGGCAACAAGATTCCTCTGTCTGAGTTTA	226	5668	EU636990.1 Beet western yellows virus from China: Gansu, complete genome
TRINITY_DN137_c0_g1_i1	HM804472.1	70.558	197	58	0	2	198	768	964	3.6e-19	95.1	HM804472.1	104	139	139	0	70.56	1	1	TCATTCAAGATACCAAAATGCCCTCCCATACACTCGGTGTTACAGGTCCAATACAAAGATGGATCTCACGCTGGGTACGCTACCTGCGTAACGCTCTACAATGGAACGAACGGGCTTCTGACTGCCCATCACGTGGCTGTCCCAGGTAGCAAAATTGTCTCCACCAGGAATGGAAACAAGATCCCACTCTCTGAATT	TCTTTTAAGATCCCACAGTCCCCCCCCAAACACAGTGTGCTCCAAGTGCAACACCCAGACGGCTCCCACGCAGGTTATGCCACGTGCGTGATGCTCTACAATGGAGCAACCGGTCTCTTGACCGCACAACATGTAGTTTCACCTGGGTGTAAGGTCGTGTCGACAAGGAATGGAAACAAAATCCCCTTGTCTGAGTT	226	5626	HM804472.1 Beet western yellows virus strain BJ genotype B, complete genome
TRINITY_DN137_c0_g1_i1	JQ700306.1	70.093	214	62	2	2	214	760	972	4.39e-18	91.5	JQ700306.1	100	150	150	2	70.09	1	1	TCATTCAAGATACCAAAATGCCCTCCCATACACTCGGTGTTACAGGTCCAATACAAAGATGGATCTCACGCTGGGTACGCTACCTGCGTAACGCTCTACAATGGAACGAACGGGCTTCTGACTGCCCATCACGTGGCTGTCCCAGGTAGCAAAATTGTCTCCACCAGGAATGGAAACAAGATCCCACTCTCTGAATTTAG-ATCAATCATGGAA	TCATTTAAAATCCCACAAACCCCTCCCGGCAAAAGTGTGTTGCAAGTGCAGCACCAGGATGGATCCCACGCAGGTTATGCAACCTGCGTTGCGCTTTACAATGGATCAACAGGGCTTATAACAGCCCATCACGTGATCACTCCTGGCGCTAAAATAGTCTCCACTCGGAACGGCTCTAAAATACCAGTCTCCGAGTTTCGCATCAAAC-TGGAA	226	5679	JQ700306.1 Cucurbit aphid-borne yellows virus isolate CABYV-R-TW82, complete genome
TRINITY_DN137_c0_g1_i1	JQ700307.1	70.352	199	57	2	2	199	769	966	1.86e-16	86	JQ700307.1	94	140	140	2	70.35	1	1	TCATTCAAGATACCAAAATGCCCTCCCA-TACACTCGGTGTTACAGGTCCAATACAAAGATGGATCTCACGCTGGGTACGCTACCTGCGTAACGCTCTACAATGGAACGAACGGGCTTCTGACTGCCCATCACGTGGCTGTCCCAGGTAGCAAAATTGTCTCCACCAGGAATGGAAACAAGATCCCACTCTCTGAATTT	TCATTCAAAATCCCACAAACCCCTCCCGGTAAAAGCG-TGTTGCAAGTGCAGCACCAGGATGGATCTCACGCAGGTTATGCAACCTGCGTTGCACTTTTCAATGGATCAACAGGGCTCATAACAGCCCACCATGTGATCACTCCTGGCGCTAAAATAGTCTCCACTCGGAATGGCTCTAAGATCCCAGCCTCCGAGTTT	226	5676	JQ700307.1 Melon aphid-borne yellows virus isolate MABYV-TW1, complete genome
TRINITY_DN137_c0_g1_i1	KM076647.1	71.338	157	45	0	44	200	810	966	7.93e-15	80.6	KM076647.1	88	112	112	0	71.34	1	1	CAGGTCCAATACAAAGATGGATCTCACGCTGGGTACGCTACCTGCGTAACGCTCTACAATGGAACGAACGGGCTTCTGACTGCCCATCACGTGGCTGTCCCAGGTAGCAAAATTGTCTCCACCAGGAATGGAAACAAGATCCCACTCTCTGAATTTA	CAGGTGCAACATCCAGACGGCTCCCACGCGGGCTATGCCACATGCGTGATGCTTTACAACGGAACAACCGGTCTTTTGACCGCGCAACATGTAGTTTCGTCTGGGTGCAAGGTCGTGTCGACAAGGAATGGAAACAAAATCCCCTTGTCTGAGTTTA	226	5740	KM076647.1 Beet western yellows virus isolate LS, complete genome
TRINITY_DN137_c0_g1_i1	HM804471.1	72.028	143	40	0	58	200	824	966	2.77e-14	78.8	HM804471.1	86	103	103	0	72.03	1	1	AGATGGATCTCACGCTGGGTACGCTACCTGCGTAACGCTCTACAATGGAACGAACGGGCTTCTGACTGCCCATCACGTGGCTGTCCCAGGTAGCAAAATTGTCTCCACCAGGAATGGAAACAAGATCCCACTCTCTGAATTTA	AGACGGCTCCCACGCGGGCTATGCCACATGCGTGATGCTTTACAACGGAACAACCGGTCTTCTGACCGCGCAACATGTAGTTTCGTCTGGGTGTAAGGTCGTGTCGACAAGGAATGGAAACAAAATCCCCTTGTCTGAGTTTA	226	5674	HM804471.1 Beet western yellows virus strain BJ genotype A, complete genome
TRINITY_DN137_c0_g1_i1	NC_004756.1	69.652	201	57	3	2	200	768	966	2.77e-14	78.8	NC_004756.1	86	140	140	4	69.65	1	1	TCATTCAAGATACCAAAATGCCCTCCCATACACTCGGTGT--TACAGGTCCAATACAAAGATGGATCTCACGCTGGGTACGCTACCTGCGTAACGCTCTACAATGGAACGAACGGGCTTCTGACTGCCCATCACGTGGCTGTCCCAGGTAGCAAAATTGTCTCCACCAGGAATGGAAACAAGATCCCACTCTCTGAATTTA	TCCTTCAAGATCCCACAGTCCCC-CCCAAAGAA-CAGTGTCCTCCAAGTGCAACATCCAGACGGCTCCCACGCAGGCTATGCCACATGCGTGACGCTTTACAATGGAACAACCGGTCTTTTGACCGCACAACATGTAGTTTCGTCTGGGTGCAAGGTCGTGTCGACAAGGAACGGGAATAAAATCCCCTTGTCTGAGTTTA	226	5666	NC_004756.1 Beet western yellows virus, complete genome
TRINITY_DN137_c0_g1_i1	AB903033.1	73.6	125	33	0	2	126	710	834	9.66e-14	77	AB903033.1	84	92	92	0	73.6	1	1	TCATTCAAGATACCAAAATGCCCTCCCATACACTCGGTGTTACAGGTCCAATACAAAGATGGATCTCACGCTGGGTACGCTACCTGCGTAACGCTCTACAATGGAACGAACGGGCTTCTGACTGC	TCCTTCAAGATTCCACAGTCTCCTCCAAAACATAGTGTGCTTCAGGTACAACACCCGGATGGATCCCATGCTGGCTATGCCACATGTGTGATGCTTTACAATGGAACGACTGGTCTCCTGACTGC	226	5545	AB903033.1 Beet western yellows virus genomic RNA, nearly complete genome, strain: BWYV-Memuro
TRINITY_DN137_c0_g1_i1	AB903034.1	73.6	125	33	0	2	126	710	834	9.66e-14	77	AB903034.1	84	92	92	0	73.6	1	1	TCATTCAAGATACCAAAATGCCCTCCCATACACTCGGTGTTACAGGTCCAATACAAAGATGGATCTCACGCTGGGTACGCTACCTGCGTAACGCTCTACAATGGAACGAACGGGCTTCTGACTGC	TCCTTCAAGATTCCACAGTCTCCTCCAAAACATAGTGTGCTTCAGGTACAACACCCGGATGGATCCCATGCTGGCTATGCCACATGTGTGATGCTTTACAATGGAACGACTGGTCTCCTGACTGC	226	5545	AB903034.1 Beet western yellows virus genomic RNA, nearly complete genome, strain: BWYV-Kunneppu
TRINITY_DN137_c0_g1_i1	AB903035.1	73.6	125	33	0	2	126	710	834	9.66e-14	77	AB903035.1	84	92	92	0	73.6	1	1	TCATTCAAGATACCAAAATGCCCTCCCATACACTCGGTGTTACAGGTCCAATACAAAGATGGATCTCACGCTGGGTACGCTACCTGCGTAACGCTCTACAATGGAACGAACGGGCTTCTGACTGC	TCCTTCAAGATTCCACAGTCTCCTCCAAAACATAGTGTGCTTCAGGTACAACACCCGGATGGATCCCATGCTGGCTATGCCACATGTGTGATGCTTTACAATGGAACGACTGGTCTCCTGACTGC	226	5545	AB903035.1 Beet western yellows virus genomic RNA, nearly complete genome, strain: BWYV-Otofukke
TRINITY_DN137_c0_g1_i1	AB903036.1	73.6	125	33	0	2	126	710	834	9.66e-14	77	AB903036.1	84	92	92	0	73.6	1	1	TCATTCAAGATACCAAAATGCCCTCCCATACACTCGGTGTTACAGGTCCAATACAAAGATGGATCTCACGCTGGGTACGCTACCTGCGTAACGCTCTACAATGGAACGAACGGGCTTCTGACTGC	TCCTTCAAGATTCCACAGTCTCCTCCAAAACATAGTGTGCTTCAGGTACAACACCCGGATGGATCCCATGCTGGCTATGCCACATGTGTGATGCTTTACAATGGAACGACTGGTCTCCTGACTGC	226	5545	AB903036.1 Beet western yellows virus genomic RNA, nearly complete genome, strain: BWYV-Ikeda
TRINITY_DN137_c0_g1_i1	AB903037.1	73.6	125	33	0	2	126	710	834	9.66e-14	77	AB903037.1	84	92	92	0	73.6	1	1	TCATTCAAGATACCAAAATGCCCTCCCATACACTCGGTGTTACAGGTCCAATACAAAGATGGATCTCACGCTGGGTACGCTACCTGCGTAACGCTCTACAATGGAACGAACGGGCTTCTGACTGC	TCCTTCAAGATTCCACAGTCTCCTCCAAAACATAGTGTGCTTCAGGTACAACACCCGGATGGATCCCATGCTGGCTATGCCACATGTGTGATGCTTTACAATGGAACGACTGGTCTCCTGACTGC	226	5545	AB903037.1 Beet western yellows virus genomic RNA, nearly complete genome, strain: BWYV-Kiyosato
TRINITY_DN137_c0_g1_i1	AB903038.1	73.6	125	33	0	2	126	710	834	9.66e-14	77	AB903038.1	84	92	92	0	73.6	1	1	TCATTCAAGATACCAAAATGCCCTCCCATACACTCGGTGTTACAGGTCCAATACAAAGATGGATCTCACGCTGGGTACGCTACCTGCGTAACGCTCTACAATGGAACGAACGGGCTTCTGACTGC	TCCTTCAAGATTCCACAGTCTCCTCCAAAACATAGTGTGCTTCAGGTACAACACCCGGATGGATCCCATGCTGGCTATGCCACATGTGTGATGCTTTACAATGGAACGACTGGTCTCCTGACTGC	226	5545	AB903038.1 Beet western yellows virus genomic RNA, nearly complete genome, strain: BWYV-Ashoro
TRINITY_DN137_c0_g1_i1	KU521324.1	72.222	144	38	2	58	200	824	966	1.18e-12	73.4	KU521324.1	80	104	104	2	72.22	1	1	AGATGGATCTCACGCTGGGTACGCTACCTGCGTAACGCTCTACAATGGAACGAACGGGCTTCTGACTGCCCATCACGTGGCTGTC-CCAGGTAGCAAAATTGTCTCCACCAGGAATGGAAACAAGATCCCACTCTCTGAATTTA	AGACGGCTCCCACGCAGGCTATGCCACATGCGTGATGCTTTACAATGGAACAACCGGTCTTTTGACTGCGCAACATGT-AATCTCGTCTGGGTGCAAGGTCGTGTCGACTAGGAACGGGAACAAGATCCCCTTGTCCGAGTTTA	226	5636	KU521324.1 Beet western yellows virus isolate Mulhouse, complete genome
TRINITY_DN137_c0_g1_i1	KU521325.1	72.222	144	38	2	58	200	824	966	1.18e-12	73.4	KU521325.1	80	104	104	2	72.22	1	1	AGATGGATCTCACGCTGGGTACGCTACCTGCGTAACGCTCTACAATGGAACGAACGGGCTTCTGACTGCCCATCACGTGGCTGTC-CCAGGTAGCAAAATTGTCTCCACCAGGAATGGAAACAAGATCCCACTCTCTGAATTTA	AGACGGCTCCCACGCAGGCTATGCCACATGCGTGATGCTTTACAATGGAACAACCGGTCTTTTGACTGCGCAACATGT-AATCTCGTCTGGGTGCAAGGTCGTGTCGACTAGGAACGGGAACAAGATCCCCTTGTCCGAGTTTA	226	5696	KU521325.1 Beet western yellows virus isolate Rouen 1, complete genome
TRINITY_DN137_c0_g1_i1	KU521326.1	72.222	144	38	2	58	200	824	966	1.18e-12	73.4	KU521326.1	80	104	104	2	72.22	1	1	AGATGGATCTCACGCTGGGTACGCTACCTGCGTAACGCTCTACAATGGAACGAACGGGCTTCTGACTGCCCATCACGTGGCTGTC-CCAGGTAGCAAAATTGTCTCCACCAGGAATGGAAACAAGATCCCACTCTCTGAATTTA	AGACGGCTCCCACGCAGGCTATGCCACATGCGTGATGCTTTACAATGGAACAACCGGTCTTTTGACTGCGCAACATGT-AATCTCGTCTGGGTGCAAGGTCGTGTCGACTAGGAACGGGAACAAGATCCCCTTGTCCGAGTTTA	226	5630	KU521326.1 Beet western yellows virus isolate Rouen 2, complete genome
TRINITY_DN137_c0_g1_i1	AB903032.1	71.642	134	38	0	2	135	768	901	4.11e-12	71.6	AB903032.1	78	96	96	0	71.64	1	1	TCATTCAAGATACCAAAATGCCCTCCCATACACTCGGTGTTACAGGTCCAATACAAAGATGGATCTCACGCTGGGTACGCTACCTGCGTAACGCTCTACAATGGAACGAACGGGCTTCTGACTGCCCATCACGT	TCTTTCAAGATTCCACAGTCTCCCCCAAAACATAGTGTACTCCAAGTACAACACCCGGATGGGTCCCATGCTGGCTATGCCACATGTGTGATGCTTTACAATGGAACGACCGGTCTTCTGACTGCTCGACACGT	226	5670	AB903032.1 Beet western yellows virus genomic RNA, complete genome, strain: BWYV-Shimizu
TRINITY_DN137_c0_g1_i1	KT963000.1	69.481	154	45	2	48	200	929	1081	2.59e-08	59	KT963000.1	64	107	107	2	69.48	1	1	TCCAATACAAAGATGGATCTCACGCTGGGTACGCTACCTGCGTAACGCTCTACAATGGAACGAACGGGCTTCTGACTGCCCATCACGTGGCTGTCCCAGGTAGCAAA-ATTGTCTCCACCAGGAATGGAAACAAGATCCCACTCTCTGAATTTA	TCCAAAAAGAAGATGGCAAACACGCAGGTTATGGAACATGTGTCCGCCTGTTTAATGGAACCAACGGCCTTCTCACAGCATATCACGTGGCT-TCCAATTCGTCAAAGGTTGTCTCTACAAGGACCGGGAATAAAATCCCGTTATCTCAATTTA	226	5855	KT963000.1 Phasey bean mild yellows virus isolate ESPCL15, complete genome
TRINITY_DN137_c0_g1_i1	KR476808.1	82	50	9	0	151	200	1019	1068	1.34e-05	50	KR476808.1	54	41	41	0	82	1	1	CAAAATTGTCTCCACCAGGAATGGAAACAAGATCCCACTCTCTGAATTTA	CAAAGTCGTCTCCACCAAAACTGGTAACAAGATCCCCATCTCCGAATTTA	226	5961	KR476808.1 Luffa aphid-borne yellows virus isolate TH24-B, complete genome
TRINITY_DN137_c0_g1_i1	EF107543.1	80.392	51	10	0	152	202	948	998	4.69e-05	48.2	EF107543.1	52	41	41	0	80.39	1	1	AAAATTGTCTCCACCAGGAATGGAAACAAGATCCCACTCTCTGAATTTAGA	AAAGTCGTCTCCACCCGCAATGGAAACAAAATCCCCCTTGATGAATTCAGA	226	5721	EF107543.1 Beet mild yellowing virus isolate Broom's Barn, complete genome
TRINITY_DN137_c0_g1_i1	DQ132996.1	80.392	51	10	0	152	202	948	998	4.69e-05	48.2	DQ132996.1	52	41	41	0	80.39	1	1	AAAATTGTCTCCACCAGGAATGGAAACAAGATCCCACTCTCTGAATTTAGA	AAAGTCGTCTCCACCCGCAATGGAAACAAAATCCCCCTTGATGAATTCAGA	226	5723	DQ132996.1 Beet mild yellowing virus isolate IPP, complete genome
TRINITY_DN137_c0_g1_i1	KC121026.1	80.392	51	10	0	152	202	948	998	4.69e-05	48.2	KC121026.1	52	41	41	0	80.39	1	1	AAAATTGTCTCCACCAGGAATGGAAACAAGATCCCACTCTCTGAATTTAGA	AAAGTCGTCTCCACCCGCAATGGAAACAAAATCCCCCTTGATGAATTCAGA	226	5723	KC121026.1 Beet mild yellowing virus isolate EK, complete sequence
TRINITY_DN137_c0_g1_i1	NC_003491.1	80.392	51	10	0	152	202	948	998	4.69e-05	48.2	NC_003491.1	52	41	41	0	80.39	1	1	AAAATTGTCTCCACCAGGAATGGAAACAAGATCCCACTCTCTGAATTTAGA	AAAGTCGTCTCCACCCGCAATGGAAACAAAATCCCCCTTGATGAATTCAGA	226	5722	NC_003491.1 Beet mild yellowing virus, complete genome
TRINITY_DN137_c0_g1_i1	NC_016038.1	84.615	39	6	0	68	106	870	908	0.000571	44.6	NC_016038.1	48	33	33	0	84.62	1	1	CACGCTGGGTACGCTACCTGCGTAACGCTCTACAATGGA	CACGCTGGCTACGCCAGCTGTGTCAAGCTCTACAATGGA	226	5666	NC_016038.1 Brassica yellows virus, complete genome
TRINITY_DN153_c0_g1_i1	NC_027822.1	77.286	339	71	4	1	336	65	400	3.42e-66	251	NC_027822.1	278	262	262	6	77.29	1	1	GGAAGATTTCACTCAAGAACCAACCAACCACTACGTCCTTGGAAAGGGGTCTCATTTAGTTGACGCACTCCACCTTCGTCCCGCAAAGACAGGGTCAACCACTTCCGAGGATGTTATCCCTCTTC--ACTTCGAGGAC-CCCAACTTACGTGAGATCGCTAAGTATGGGGGGTACTCAACCTACAGCTCTAACTCTAACACCGATCCTCAGGTGAGAGAGAGTCTAAAGTTATTCAACCGAGACGTCTACGAGGACATCCGTGGCTTCACTCGCCGCCCACAAGGTAACGTGGGTATGTACACTGCTTTAAACAAGTTCTCTGGCGAGAAAAGCACATT	GGAAGATTTTACTCAAGATCCAACCACACACAACATCGTTGCTGAGGGGTCTCATTTAATTGACGCACTCCACCTTCGACCCCCAAAGTCAAGGTCAGCCACCAGCGAAGATGTTGT--CTCTTCCAACTT-TAGGTCACCCAACCTGGCGGAGATCGCCAAATATGGGGGGTACTCAACGTACTCGTCTAACTCTAACACCGATCCTTATGTTAGAGAGACATTAAAACTATTTTCTCGAGACACCTACGAGGATATCCGTGGTTTCACTCGTCGTCCGCAAGGGACTCCAGGCATGTACACTGCCCTGAAGAAGTTCAGCGGAGAGCGAAACACATT	349	1767	NC_027822.1 Verticillium dahliae partitivirus 1 isolate Vd-253 segment RNA1, complete sequence
TRINITY_DN153_c0_g1_i1	NC_010349.1	76.087	322	68	5	1	316	64	382	2.02e-56	219	NC_010349.1	242	245	245	9	76.09	1	1	GGAAGATTTCACTCAAGAACCAACCAACCACTACGTCCTTGGAAAGGGGTCTCATTTAGTTGACGCACTCCACCTTCGTCCCGCAAA---GACAGGGTCAACCACTTCCGAGGATGTTATCCCTCTTC--ACTTCGAGGAC-CCCAACTTACGTGAGATCGCTAAGTATGGGGGGTACTCAACCTACAGCTCTAACTCTAACACCGATCCTCAGGTGAGAGAGAGTCTAAAGTTATTCAACCGAGACGTCTACGAGGACATCCGTGGCTTCACTCGCCGCCCACAAGGTAACGTGGGTATGTACACTGCTTTAAACAAGTTC	GGAAGAATTTACTCAAGAACCAACCCAACACTACGTCTTAGCTAAGGGGTCTCATTTAATTGACGCACTCCACCTCCGTCCCGATACCGGGAAGGGGTCAACCACTAGCGAAGATGTACTT--TCTTCCGACTAC-AGGTCGCCCAACTTAGCCGAGATCGCTCGCTATGGTGGATACAGCACCTACTCGTCTAACTCTAACACCGATCCTTATGTTAGAGAGACATTAAAACTATTTTCTCGAGACACCTACGAGGATATCCGTGGTTTCACTCGCCGTCCTGAAGGCACTCCTGGCATGTACAAGGCTTTGGAGAAGTTC	349	1793	NC_010349.1 Botryotinia fuckeliana partitivirus 1, complete segment 1, genomic RNA
TRINITY_DN153_c0_g1_i1	KC422244.1	75.235	319	73	5	1	316	65	380	1.55e-51	203	KC422244.1	224	240	240	6	75.24	1	1	GGAAGATTTCACTCAAGAACCAACCAACCACTACGTCCTTGGAAAGGGGTCTCATTTAGTTGACGCACTCCACCTTCGTCCCGCAAAGACAGGGTCAACCACTTCCGAGGATGTTATCCCTCTTCACTTCGAGGAC-CCCAACTTACGTGAGATCGCTAAGTA-TG-GGGGGTACTCAACCTACAGCTCTAACTCTAACACCGATCCTCAGGTGAGAGAGAGTCTAAAGTTATTCAACCGAGACGTCTACGAGGACATCCGTGGCTTCACTCGCCGCCCACAAGGTAACGTGGGTATGTACACTGCTTTAAACAAGTTC	GGAAGATTTTACTCAAGATCCAACCACACACAACATCGTTGCTGAGGGGTCTCATTTAATTGACGCACTCCACCTTCGGCCCCCAAAGCTGAGGTCAACCACCAGCGAAGATGTTGTTCCTTCCAAATTC-AGGTCTCCCAACC--CGATCGATCATGATGCAATGCGGGGGTACTCTACGTACTCGTCTAACTCTAACACTGATCCTTATGTTAGAGAGACATTAAAACTATTTTCTCGAGACACCTACGAGGATATCCGTGGTTTCACTCGTCGTCCGCAAGGAACTCCAGGCATGTACACTGCTCTGAAGAAGTTC	349	1768	KC422244.1 Verticillium dahliae partitivirus 1 strain Vd08284 RNA-dependent RNA polymerase gene, complete cds
TRINITY_DN153_c0_g1_i1	NC_028499.1	73.065	323	81	4	8	327	62	381	6.18e-44	178	NC_028499.1	196	236	236	6	73.07	1	1	TTCACTCAAGAACCAACCAACCACTACGTCCTTGGAAAGGGGTCTCATTTAGTTGACGCACTCCACCTTCGTCCCGCAAAGACAGGGTCAACCACTTCCGAGGATGTTATCCCTCTTCACTTCGAGGACCCCAACTTACGTGAGATCGCTAAGTATGGGGGGTACTCAACCTACAGCTCTAACTCTAACACCGATCCTCAGGTGAGAGAGAGTCTAAAGTTA--TTCAACCGAGACGTCTACGAGGACATCCGTGGCTTCACTCGCCGCCCACAAGGTA-ACGTGGGTATGTACACTGCTTTAAACAAGTTCTCTGGCGAGAA	TTTACTCAAGAACCAACTCAACACTACGTCTTAGCTAAGGGGTCTCATTTAATTGACTCACTCCACCTCCGTCCTGCAAAGGCGGGGTCAGCCACTAGCGAAGATGTGTTACCAACCGGCTATAACTCTCCGAACCTACGAGAGATAGCCAAGTTTGGTGGGTACTCAACCTACTCGTCTGCCTCGAACACCGATCCTTGGGTCAGAGAGACGTTAAAATTATTTTCAA--GAGAACGCTACGAGGAAATCTACGGTTTCACCAGGCGACCAGAGGGTACACCAGGG-ATGTACAAGTCCCTGGCCAAGTTCGCCGGTGAGAA	349	1762	NC_028499.1 Penicillium aurantiogriseum partitivirus 1 RNA 1, complete sequence
TRINITY_DN153_c0_g1_i1	NC_003710.1	72.085	283	77	2	1	282	64	345	1.05e-34	147	NC_003710.1	162	204	204	2	72.08	1	1	GGAAGATTTCACTCAAGAACCAACCAACCACTA-CGTCCTTGGAAAGGGGTCTCATTTAGTTGACGCACTCCACCTTCGTCCCGCAAAGACAGGGTCAACCACTTCCGAGGATGTTATCCCTCTTCACTTCGAGGACCCCAACTTACGTGAGATCGCTAAGTATGGGGGGTACTCAACCTACAGCTCTAACTCTAACACCGATCCTCAGGTGAGAGAGAGTCTAAAGTTATTCAACCGAGACGTCTACGAGGACATCCGTGGCTTCACTCGCCGCCCACAAGG	GGAAGGATTTACTCAAGAACCGA-CAAACACTACCGTCTTAGCTGAGGAGTTGCATTCAGTTGACACACTCCATCTGCGTCCAGGCAAGACCAGATCAACCACCAGCGAGGACGTGCTTCCAAACAATTACGAGGATCCGTGCTTACGTGAAATCGCTAAGTATGGTGGGTATTCTACCTACTCGTCAAACTCTAATACTGATCCGTGGATTAGAGAGACACTAAAATTACACGATCGACAAATCTACGAAGACATCTGGGGTAAAACCCGTCGTCCAGAAGG	349	1781	NC_003710.1 Discula destructiva virus 2 segment 1, complete genome
TRINITY_DN153_c0_g1_i1	NC_002797.1	70.742	229	67	0	1	229	67	295	7.54e-24	111	NC_002797.1	122	162	162	0	70.74	1	1	GGAAGATTTCACTCAAGAACCAACCAACCACTACGTCCTTGGAAAGGGGTCTCATTTAGTTGACGCACTCCACCTTCGTCCCGCAAAGACAGGGTCAACCACTTCCGAGGATGTTATCCCTCTTCACTTCGAGGACCCCAACTTACGTGAGATCGCTAAGTATGGGGGGTACTCAACCTACAGCTCTAACTCTAACACCGATCCTCAGGTGAGAGAGAGTCTAAAGTTA	GGAAGAATTTACTCAAGATCCTACCCTACACAACGTACAAGCTGAGGAGTCTCATTCAATTGACACACTCCACCTACGCGATGCTAAGCGTGGGTCATCCACCAGCGAAGACGTTCTTCACAAGGGCTATGCTGATCCGTGTTTACGGGAAGTAGCCAAGTATGGTGGGTACTCAACCTACTCGTCTAACTCTAACACCGATCCTTGGATTAGAGAGACGCTAAAGATA	349	1787	NC_002797.1 Discula destructiva virus 1 segment 1, complete genome
TRINITY_DN153_c0_g2_i1	NC_027822.1	77.215	395	82	6	2	392	10	400	5.57e-77	288	NC_027822.1	318	305	305	8	77.22	1	1	CTCGCGCTTTTACCGTGTAAACGGGTTTAA-CCTCCTTTTTCTCTGAAGCCGAAATGGAAGATTTCACTTCAGAACCAACCAACCACTACGTCCTTGGAAAGGGGTCTCATTTAGTTGACGCACTCCACCTTCGTCCCGCAAAGACAGGGTCAACCACTTCCGAGGATGTTATCCCTCTTC--ACTTCGAGGAC-CCCAACTTACGTGAGATCGCTAAGTATGGGGGGTACTCAACCTACAGCTCTAACTCTAACACCGATCCTCAGGTGAGAGAGAGTCTAAAGTTATTCAACCGAGACGTCTACGAGGACATCCGTGGCTTCACTCGCCGCCCACAAGGTAACGTGGGTATGTACACTGCTTTAAACAAGTTCTCTGGCGAGAAAAGCACATT	CTAGCGCTTTTACCGTGTCAACGGGTTTATGCCTCCTTCATTCCTTGAGC-GAAATGGAAGATTTTACTCAAGATCCAACCACACACAACATCGTTGCTGAGGGGTCTCATTTAATTGACGCACTCCACCTTCGACCCCCAAAGTCAAGGTCAGCCACCAGCGAAGATGTTGT--CTCTTCCAACTT-TAGGTCACCCAACCTGGCGGAGATCGCCAAATATGGGGGGTACTCAACGTACTCGTCTAACTCTAACACCGATCCTTATGTTAGAGAGACATTAAAACTATTTTCTCGAGACACCTACGAGGATATCCGTGGTTTCACTCGTCGTCCGCAAGGGACTCCAGGCATGTACACTGCCCTGAAGAAGTTCAGCGGAGAGCGAAACACATT	405	1767	NC_027822.1 Verticillium dahliae partitivirus 1 isolate Vd-253 segment RNA1, complete sequence
TRINITY_DN153_c0_g2_i1	KC422244.1	75.538	372	83	7	5	372	13	380	8.83e-62	237	KC422244.1	262	281	281	8	75.54	1	1	GCGCTTTTACCGTGTAAACGGGTTTAA-CCTCCTTTTTCTCTGAAGCCGAAATGGAAGATTTCACTTCAGAACCAACCAACCACTACGTCCTTGGAAAGGGGTCTCATTTAGTTGACGCACTCCACCTTCGTCCCGCAAAGACAGGGTCAACCACTTCCGAGGATGTTATCCCTCTTCACTTCGAGGAC-CCCAACTTACGTGAGATCGCTAAG-TATG-GGGGGTACTCAACCTACAGCTCTAACTCTAACACCGATCCTCAGGTGAGAGAGAGTCTAAAGTTATTCAACCGAGACGTCTACGAGGACATCCGTGGCTTCACTCGCCGCCCACAAGGTAACGTGGGTATGTACACTGCTTTAAACAAGTTC	GCGCTTTTACCGTGTTAACGGGTTTACGCCTCCTTCATTCCTTGAGC-GAAATGGAAGATTTTACTCAAGATCCAACCACACACAACATCGTTGCTGAGGGGTCTCATTTAATTGACGCACTCCACCTTCGGCCCCCAAAGCTGAGGTCAACCACCAGCGAAGATGTTGTTCCT-TCCAAATTCAGGTCTCCCAAC--CCGATCGATCATGATGCAATGCGGGGGTACTCTACGTACTCGTCTAACTCTAACACTGATCCTTATGTTAGAGAGACATTAAAACTATTTTCTCGAGACACCTACGAGGATATCCGTGGTTTCACTCGTCGTCCGCAAGGAACTCCAGGCATGTACACTGCTCTGAAGAAGTTC	405	1768	KC422244.1 Verticillium dahliae partitivirus 1 strain Vd08284 RNA-dependent RNA polymerase gene, complete cds
TRINITY_DN153_c0_g2_i1	NC_010349.1	74.194	372	83	7	9	372	16	382	2.37e-56	219	NC_010349.1	242	276	276	13	74.19	1	1	TTTTACCGTGTAAACGGGTTTAA--CCTCCTTTTTCTCTGAAGCCGAAATGGAAGATTTCACTTCAGAACCAACCAACCACTACGTCCTTGGAAAGGGGTCTCATTTAGTTGACGCACTCCACCTTCGTCCCGCAAA---GACAGGGTCAACCACTTCCGAGGATGTTATCCCTCTTC--ACTTCGAGGAC-CCCAACTTACGTGAGATCGCTAAGTATGGGGGGTACTCAACCTACAGCTCTAACTCTAACACCGATCCTCAGGTGAGAGAGAGTCTAAAGTTATTCAACCGAGACGTCTACGAGGACATCCGTGGCTTCACTCGCCGCCCACAAGGTAACGTGGGTATGTACACTGCTTTAAACAAGTTC	TTTGACAGTGAAAACTGTTTTTCTGCCTCCTTCATTCCTTGAGC--AAATGGAAGAATTTACTCAAGAACCAACCCAACACTACGTCTTAGCTAAGGGGTCTCATTTAATTGACGCACTCCACCTCCGTCCCGATACCGGGAAGGGGTCAACCACTAGCGAAGATGTACTT--TCTTCCGACTAC-AGGTCGCCCAACTTAGCCGAGATCGCTCGCTATGGTGGATACAGCACCTACTCGTCTAACTCTAACACCGATCCTTATGTTAGAGAGACATTAAAACTATTTTCTCGAGACACCTACGAGGATATCCGTGGTTTCACTCGCCGTCCTGAAGGCACTCCTGGCATGTACAAGGCTTTGGAGAAGTTC	405	1793	NC_010349.1 Botryotinia fuckeliana partitivirus 1, complete segment 1, genomic RNA
TRINITY_DN153_c0_g2_i1	NC_028499.1	72.513	382	91	8	8	383	8	381	3.29e-48	192	NC_028499.1	212	277	277	14	72.51	1	1	CTTTTACCGTGTAAACGGGTTTAA--CCTCCTTTT-TCTCTGAAGCCGAAATGGAAGATTTCACTTCAGAACCAACCAACCACTACGTCCTTGGAAAGGGGTCTCATTTAGTTGACGCACTCCACCTTCGTCCCGCAAAGACAGGGTCAACCACTTCCGAGGATGTTATCCCTCTTCACTTCGAGGACCCCAACTTACGTGAGATCGCTAAGTATGGGGGGTACTCAACCTACAGCTCTAACTCTAACACCGATCCTCAGGTGAGAGAGAGTCTAAAGTTA--TTCAACCGAGACGTCTACGAGGACATCCGTGGCTTCACTCGCCGCCCACAAGGTA-ACGTGGGTATGTACACTGCTTTAAACAAGTTCTCTGGCGAGAA	CTTTTACCGTGTCAACGGGTTTCTGTCCTCCTTTCATATCTTGAGC--AAATGGCA---TTTACTCAAGAACCAACTCAACACTACGTCTTAGCTAAGGGGTCTCATTTAATTGACTCACTCCACCTCCGTCCTGCAAAGGCGGGGTCAGCCACTAGCGAAGATGTGTTACCAACCGGCTATAACTCTCCGAACCTACGAGAGATAGCCAAGTTTGGTGGGTACTCAACCTACTCGTCTGCCTCGAACACCGATCCTTGGGTCAGAGAGACGTTAAAATTATTTTCAA--GAGAACGCTACGAGGAAATCTACGGTTTCACCAGGCGACCAGAGGGTACACCAGGG-ATGTACAAGTCCCTGGCCAAGTTCGCCGGTGAGAA	405	1762	NC_028499.1 Penicillium aurantiogriseum partitivirus 1 RNA 1, complete sequence
TRINITY_DN153_c0_g2_i1	NC_003710.1	70.783	332	92	4	9	338	17	345	3.52e-35	149	NC_003710.1	164	235	235	5	70.78	1	1	TTTTACC-GTGTAAACGGGTTTAACCTCCTTTTTCTCTGAAGCCGAAATGGAAGATTTCACTTCAGAACCAACCAACCACTAC-GTCCTTGGAAAGGGGTCTCATTTAGTTGACGCACTCCACCTTCGTCCCGCAAAGACAGGGTCAACCACTTCCGAGGATGTTATCCCTCTTCACTTCGAGGACCCCAACTTACGTGAGATCGCTAAGTATGGGGGGTACTCAACCTACAGCTCTAACTCTAACACCGATCCTCAGGTGAGAGAGAGTCTAAAGTTATTCAACCGAGACGTCTACGAGGACATCCGTGGCTTCACTCGCCGCCCACAAGG	TTTTACCTGTGACACAGGGTTGAGCCTACTTCATATCTTGAGCG--AATGGAAGGATTTACTCAAGAACCGACAAAC-ACTACCGTCTTAGCTGAGGAGTTGCATTCAGTTGACACACTCCATCTGCGTCCAGGCAAGACCAGATCAACCACCAGCGAGGACGTGCTTCCAAACAATTACGAGGATCCGTGCTTACGTGAAATCGCTAAGTATGGTGGGTATTCTACCTACTCGTCAAACTCTAATACTGATCCGTGGATTAGAGAGACACTAAAATTACACGATCGACAAATCTACGAAGACATCTGGGGTAAAACCCGTCGTCCAGAAGG	405	1781	NC_003710.1 Discula destructiva virus 2 segment 1, complete genome
TRINITY_DN153_c0_g2_i1	NC_002797.1	69.444	288	83	3	1	285	10	295	7.26e-25	114	NC_002797.1	126	200	200	5	69.44	1	1	CCTCGCGCTTTTACC-GTGTAAACGGGTTTAA--CCTCCTTTTTCTCTGAAGCCGAAATGGAAGATTTCACTTCAGAACCAACCAACCACTACGTCCTTGGAAAGGGGTCTCATTTAGTTGACGCACTCCACCTTCGTCCCGCAAAGACAGGGTCAACCACTTCCGAGGATGTTATCCCTCTTCACTTCGAGGACCCCAACTTACGTGAGATCGCTAAGTATGGGGGGTACTCAACCTACAGCTCTAACTCTAACACCGATCCTCAGGTGAGAGAGAGTCTAAAGTTA	CCTCGCGCTTTTCTCTGTTTATCAGAGTTTCCTGCCTCCTTCATCTCTTGAGCG--AATGGAAGAATTTACTCAAGATCCTACCCTACACAACGTACAAGCTGAGGAGTCTCATTCAATTGACACACTCCACCTACGCGATGCTAAGCGTGGGTCATCCACCAGCGAAGACGTTCTTCACAAGGGCTATGCTGATCCGTGTTTACGGGAAGTAGCCAAGTATGGTGGGTACTCAACCTACTCGTCTAACTCTAACACCGATCCTTGGATTAGAGAGACGCTAAAGATA	405	1787	NC_002797.1 Discula destructiva virus 1 segment 1, complete genome
TRINITY_DN273_c0_g1_i1	NC_014481.1	66.667	192	60	4	29	218	1667	1856	0.000659	44.6	NC_014481.1	48	128	128	4	66.67	1	1	ATACGCGGAGGGAGGTTGTGATGAGAGGGGGCTTCCATTTCTTTCTACGAGAATTGGTTTCAGGACGAAGCT-CTTGAGTGAGGAGGCTGCCCTAGAAAGGATTCAGAAAGGAGGGAGC-TTTGGAAGAGCAGTAATGATGTTAGATGCGCTAGAGCAGGCGACGTCCACTCCCCTATACAATGTTCTCTCA	ATACGGGGATGGAAGGGGCGACGAGAGGAGTTTGCCTTTCATCACGGGGAGAATAGGTTTCAGGACGAAATTGCTGGAG-GAAGGGGAAGCGTTGCGGAAGA-TAAGGAATGGGGAACCATTGGGTAGGGCTGTTATGATGTTGGATGCCCTTGAGCAGATTTCATCTTCACCTCTTTATAATATTCTCTCA	258	3427	NC_014481.1 Rhododendron virus A, complete genome
TRINITY_DN276_c1_g1_i1	NC_023983.1	82.222	45	8	0	3	47	5987	5943	0.000173	46.4	NC_023983.1	50	37	37	0	82.22	1	-1	GGTGTTGATCAAGTCTGTAGAACGTGTGCCGGAGAACATGCCTTG	GGTGTTGATCAGGTCAGTGGATCGGGTTCCGGAGAACATTCCCTG	238	7475	NC_023983.1 Persimmon latent virus genomic RNA, complete genome, clone: Kaki13-14
TRINITY_DN341_c0_g1_i1	KP455654.1	98.667	450	6	0	1	450	10270	9821	0	785	KP455654.1	870	444	444	0	98.67	1	-1	GTGTTTGAATCAACACTACACAGTCCTTTCTCAATGCATTGTGTGTTGTCCCACTGCCTCCATGGGTAATTACGACATCCACACAACTGAATAGCATATTGTAGTTTGCTTCCTTTACAGCTATAACATTTGGTTTGTTAGCTGGCAAATTGTAACTCCCATCCACAACCACTATTCTAAACTGGTTGTCAAATTTTTCTATTACTTTTGATGTCAAATCTTGTCTGGTTTTACCTGTCATGGAACCAAAACACACCGCAATGCTCTTATATTGGCTTGCCCATATACAAAGGTCTTTGTCCCCGTCTTGAACTCTGTCAACCATCGTATTGGCATAACCTACGCAGCATGAAGTTTTGGATGTTTCCCACCATTTTGTCGTTTTGGGATGCAAGTACA…	GTGGTTGAATCAACACTACACAGTCCTTTCTCAATGCATTGTGTGTTGTCCCACTGCCTCCATGGGTAATTACGACATCCACACAACTGAATAGCATATTGTAGTTTGCTTCCTTTACAGCTATAACATTTGGTTTGTTAGCTGGCAAATTGTAACTCCCATCCACAACCACTATTCTAAACTGGTTGTCAAATTTTTCTATTACTTTTGATGTCAAATCTTGTCTGGTTTTACCTGTCATGGAACCAAAACACACCGCAATGCTCTTATATTGGCTTGCCCATATACAAAGGTCTTTGTCCCCGTCTTGAACTCTGTCAACCATCGTATTGGCATAACCTACGCAGCATGAAGTTTTGGATGTTTCCCACCATTTTGTCGTTTTGGGATGCAAGTACA…	450	14659	KP455654.1 Bell pepper endornavirus isolate Maor, complete genome
TRINITY_DN341_c0_g1_i1	AB597230.1	98.444	450	7	0	1	450	10330	9881	0	780	AB597230.1	864	443	443	0	98.44	1	-1	GTGTTTGAATCAACACTACACAGTCCTTTCTCAATGCATTGTGTGTTGTCCCACTGCCTCCATGGGTAATTACGACATCCACACAACTGAATAGCATATTGTAGTTTGCTTCCTTTACAGCTATAACATTTGGTTTGTTAGCTGGCAAATTGTAACTCCCATCCACAACCACTATTCTAAACTGGTTGTCAAATTTTTCTATTACTTTTGATGTCAAATCTTGTCTGGTTTTACCTGTCATGGAACCAAAACACACCGCAATGCTCTTATATTGGCTTGCCCATATACAAAGGTCTTTGTCCCCGTCTTGAACTCTGTCAACCATCGTATTGGCATAACCTACGCAGCATGAAGTTTTGGATGTTTCCCACCATTTTGTCGTTTTGGGATGCAAGTACA…	GTGGTTGAATCAACACTACACAGTCCTTTCTCAATGCATTGTGTGTTGTCCCACTGCCTCCATGGGTAATTACGACATCCACACAACTGAATAGCATATTGTAGTTTGCTTCCTTTACAGCTATAACATTTGGTTTGTTAGCTGGCAAATTGTAACTCCCATCCACAACCACTATTCTAAACTGGTTGTCAAATTTTTCTATTACTTTTGATGTCAAATCTTGTCTGGTTTTACCTGTCATGGAACCAAAACACACCGCAATGCTCTTATATTGGCTTGCCCATATACAAAGGTCTTTGTCCCCGTCTTGAACTCTGTCAACCATCGTATTGGCATAACCTACGCAGCATGAAGTTTTGGATGTTTCCCACCATTTTGTCGTTTTGGGGTGCAAGTACA…	450	14727	AB597230.1 Bell pepper endornavirus genomic RNA, complete genome, host: Capsicum annuum cv. Kyosuzu
TRINITY_DN341_c0_g1_i1	JQ951943.1	98.444	450	7	0	1	450	10330	9881	0	780	JQ951943.1	864	443	443	0	98.44	1	-1	GTGTTTGAATCAACACTACACAGTCCTTTCTCAATGCATTGTGTGTTGTCCCACTGCCTCCATGGGTAATTACGACATCCACACAACTGAATAGCATATTGTAGTTTGCTTCCTTTACAGCTATAACATTTGGTTTGTTAGCTGGCAAATTGTAACTCCCATCCACAACCACTATTCTAAACTGGTTGTCAAATTTTTCTATTACTTTTGATGTCAAATCTTGTCTGGTTTTACCTGTCATGGAACCAAAACACACCGCAATGCTCTTATATTGGCTTGCCCATATACAAAGGTCTTTGTCCCCGTCTTGAACTCTGTCAACCATCGTATTGGCATAACCTACGCAGCATGAAGTTTTGGATGTTTCCCACCATTTTGTCGTTTTGGGATGCAAGTACA…	GTGGTTGAATCAACACTACACAGTCCTTTCTCAATGCATTGTGTGTTGTCCCACTGCCTCCATGGGTAATTACGACATCCACACAACTGAATAGCATATTGTAGTTTGCTTCCTTTACAGCTATAACATTTGGTTTGTTAGCTGGCAAATTGTAACTCCCATCCACAACCACTATTCTAAACTGGTTGTCAAATTTTTCTATTACTTTTGATGTCAAATCTTGTCTGGTTTTACCTGTCATGGAACCAAAACACACCGCAATGCTCTTATATTGGCTTGCCCATATACAAAGGACTTTGTCCCCGTCTTGAACTCTGTCAACCATCGTATTGGCATAACCTACGCAGCATGAAGTTTTGGATGTTTCCCACCATTTTGTCGTTTTGGGATGCAAGTACA…	450	14727	JQ951943.1 Bell pepper endornavirus strain IS RNA-dependent RNA polymerase (RdRp) gene, complete cds
TRINITY_DN341_c0_g1_i1	KT149366.1	98.444	450	7	0	1	450	10330	9881	0	780	KT149366.1	864	443	443	0	98.44	1	-1	GTGTTTGAATCAACACTACACAGTCCTTTCTCAATGCATTGTGTGTTGTCCCACTGCCTCCATGGGTAATTACGACATCCACACAACTGAATAGCATATTGTAGTTTGCTTCCTTTACAGCTATAACATTTGGTTTGTTAGCTGGCAAATTGTAACTCCCATCCACAACCACTATTCTAAACTGGTTGTCAAATTTTTCTATTACTTTTGATGTCAAATCTTGTCTGGTTTTACCTGTCATGGAACCAAAACACACCGCAATGCTCTTATATTGGCTTGCCCATATACAAAGGTCTTTGTCCCCGTCTTGAACTCTGTCAACCATCGTATTGGCATAACCTACGCAGCATGAAGTTTTGGATGTTTCCCACCATTTTGTCGTTTTGGGATGCAAGTACA…	GTGGTTGAATCAACACTACACAGTCCTTTCTCAATGCATTGTGTGTTGTCCCACTGCCTCCATGGGTAATTACGACATCCACACAACTGAATAGCATATTGTAGTTTGCTTCCTTTACAGCTATAACATTTGGTTTGTTAGCTGGCAAATTGTAACTCCCATCCACAACCACTATTCTAAACTGGTTGTCAAATTTTTCTATTACTTTTGATGTCAAATCTTGTCTGGTTTTACATGTCATGGAACCAAAACACACCGCAATGCTCTTATATTGGCTTGCCCATATACAAAGGTCTTTGTCCCCGTCTTGAACTCTGTCAACCATCGTATTGGCATAACCTACGCAGCATGAAGTTTTGGATGTTTCCCACCATTTTGTCGTTTTGGGATGCAAGTACA…	450	14726	KT149366.1 Bell pepper endornavirus, complete genome
TRINITY_DN341_c0_g1_i1	KX525267.1	98.444	450	7	0	1	450	10334	9885	0	780	KX525267.1	864	443	443	0	98.44	1	-1	GTGTTTGAATCAACACTACACAGTCCTTTCTCAATGCATTGTGTGTTGTCCCACTGCCTCCATGGGTAATTACGACATCCACACAACTGAATAGCATATTGTAGTTTGCTTCCTTTACAGCTATAACATTTGGTTTGTTAGCTGGCAAATTGTAACTCCCATCCACAACCACTATTCTAAACTGGTTGTCAAATTTTTCTATTACTTTTGATGTCAAATCTTGTCTGGTTTTACCTGTCATGGAACCAAAACACACCGCAATGCTCTTATATTGGCTTGCCCATATACAAAGGTCTTTGTCCCCGTCTTGAACTCTGTCAACCATCGTATTGGCATAACCTACGCAGCATGAAGTTTTGGATGTTTCCCACCATTTTGTCGTTTTGGGATGCAAGTACA…	GTGGTTGAATCAACACTACACAGTCCTTTCTCAATGCATTGTGTGTTGTCCCACTGCCTCCATGGGTAATTACGACATCCACACAACTGAATAGCATATTGTAGTTTGCTTCCTTTACAGCTATAACATTTGGTTTGTTAGCTGGCAAATTGTAACTCCCATCCACAACCACTATTCTAAACTGGTTGTCAAATTTTTCTATTACTTTTGATGTCAAATCTTGTCTGGTTTTACCTGTCATGGAACCAAAACACACCGCAATGCTCTTATATTGGCTTGCCCATATACAAAGGTCTTTGTCCCCGTCTTGAACTCTGTCAACCATCGTATTGGCATAACCTACGCAGCATGAAGTTTTGGATGTTTCCCACCATTTTGTTGTTTTGGGATGCAAGTACA…	450	14790	KX525267.1 Bell pepper endornavirus isolate DR Polyprotein gene, complete cds
TRINITY_DN341_c0_g1_i1	KX977569.1	98.222	450	8	0	1	450	10331	9882	0	776	KX977569.1	860	442	442	0	98.22	1	-1	GTGTTTGAATCAACACTACACAGTCCTTTCTCAATGCATTGTGTGTTGTCCCACTGCCTCCATGGGTAATTACGACATCCACACAACTGAATAGCATATTGTAGTTTGCTTCCTTTACAGCTATAACATTTGGTTTGTTAGCTGGCAAATTGTAACTCCCATCCACAACCACTATTCTAAACTGGTTGTCAAATTTTTCTATTACTTTTGATGTCAAATCTTGTCTGGTTTTACCTGTCATGGAACCAAAACACACCGCAATGCTCTTATATTGGCTTGCCCATATACAAAGGTCTTTGTCCCCGTCTTGAACTCTGTCAACCATCGTATTGGCATAACCTACGCAGCATGAAGTTTTGGATGTTTCCCACCATTTTGTCGTTTTGGGATGCAAGTACA…	GTGGTTGAATCAACACTACACAGTCCTTTCTCAATGCATTGTGTGTTGTCCCACTGCCTCCATGGGTAATTACGACATCCACACAACTGAATAGCATATTGTAGTTTGCTTCCTTTACAGCTATAACATTTGGTTTGTTAGCTGGCAAATTGTAACTCCCATCCACAACTACTATTCTAAACTGGTTGTCAAATTTTTCTATTACTTTTGATGTCAAATCTTGTCTGGTTTTACCTGTCATGGAACCAAAACACACCGCAATGCTCTTATATTGGCTTGCCCATATACAAAGGTCTTTGTCCCCGTCTTGAACTCTGTCAACCATTGTATTGGCATAACCTACGCAGCATGAAGTTTTGGATGTTTCCCACCATTTTGTCGTTTTGGGATGCAAGTACA…	450	14714	KX977569.1 Bell pepper endornavirus isolate Penol, complete genome
TRINITY_DN341_c0_g1_i1	KX977568.1	98	450	9	0	1	450	10337	9888	0	771	KX977568.1	854	441	441	0	98	1	-1	GTGTTTGAATCAACACTACACAGTCCTTTCTCAATGCATTGTGTGTTGTCCCACTGCCTCCATGGGTAATTACGACATCCACACAACTGAATAGCATATTGTAGTTTGCTTCCTTTACAGCTATAACATTTGGTTTGTTAGCTGGCAAATTGTAACTCCCATCCACAACCACTATTCTAAACTGGTTGTCAAATTTTTCTATTACTTTTGATGTCAAATCTTGTCTGGTTTTACCTGTCATGGAACCAAAACACACCGCAATGCTCTTATATTGGCTTGCCCATATACAAAGGTCTTTGTCCCCGTCTTGAACTCTGTCAACCATCGTATTGGCATAACCTACGCAGCATGAAGTTTTGGATGTTTCCCACCATTTTGTCGTTTTGGGATGCAAGTACA…	GTGGTTGAATCAACACTACACAGTCCTTTCTCAATGCATTGTGTGTTGTCCCACTGCCTCCATGGGTAATTACGACATCCACACAACTGAATAGCATATTGTAGTTTGCTTCCTTTACAGCTATAACATTTGGTTTGTTAGCTGGCAAATTGTAACTCCCATCCACAACTACTATTCTAAACTGGTTGTCAAATTTTTCTATTACTTTTGATGTCAAATCTTGTCTGGTTTTACCTGTCATGGAACCAAAACACACCGCAATGCTCTTATATTGGCTTGCCCATATACAAAGGTCTTTGTCCCCATCTTGAACTCTGTCAACCATTGTATTGGCATAACCTACGCAGCATGAAGTTTTGGATGTTTCCCACCATTTTGTCGTTTTGGGATGCAAGTACA…	450	14727	KX977568.1 Bell pepper endornavirus isolate Santa Fe, complete genome
TRINITY_DN341_c0_g1_i1	NC_015781.2	87.191	445	57	0	1	445	10331	9887	1.46e-154	545	NC_015781.2	604	388	388	0	87.19	1	-1	GTGTTTGAATCAACACTACACAGTCCTTTCTCAATGCATTGTGTGTTGTCCCACTGCCTCCATGGGTAATTACGACATCCACACAACTGAATAGCATATTGTAGTTTGCTTCCTTTACAGCTATAACATTTGGTTTGTTAGCTGGCAAATTGTAACTCCCATCCACAACCACTATTCTAAACTGGTTGTCAAATTTTTCTATTACTTTTGATGTCAAATCTTGTCTGGTTTTACCTGTCATGGAACCAAAACACACCGCAATGCTCTTATATTGGCTTGCCCATATACAAAGGTCTTTGTCCCCGTCTTGAACTCTGTCAACCATCGTATTGGCATAACCTACGCAGCATGAAGTTTTGGATGTTTCCCACCATTTTGTCGTTTTGGGATGCAAGTACA…	GTGGTTGTATCAACACAACACAGTCTTTTCTTAATGCATTGTGTGTTGTGCCACTGCCTCCATGAGTGATCACCACATCCACGCAACTAAACAACATGTTGTAATTTGCTTCCTTTACAGTTATGACATTTGGTTTGTTGGCTGGCAGCTTGTAACTTCCGTCCACAACTACTATCCTAAACTGGCTGTCAAACTTTTCTATTATTTTTGATGTTAGATCGTGTCTAGTTTTACCTGTCATGGATCCAAAACACACTGCAATGCTTCTGGATTGGCTTGCCCATATGCAAAGATCTTTGTCTCCGTCTTGCACTCTGTCAACCATTGTGTTTGCATAACCTATGCAGCAAGAAGTCTTGGATGTGTTCCACCATTTTGTTGTTTTGGGGTGCAAGTACA…	450	14728	NC_015781.2 Bell pepper endornavirus, complete genome
TRINITY_DN341_c0_g1_i1	NC_027920.1	73.128	454	114	2	1	450	10331	9882	5.84e-71	268	NC_027920.1	296	332	332	8	73.13	1	-1	GTGTTTGAATCAACACTACACAGTCCTTTCTCAATGCATTGTGTGTTGTCCCACTGCCTCCATGGGTAATTACGACATCCACACAACTGAATAGCATATTGTAGTTTGCTTCCTTTACAGCTATAACATTTGGTTTGTTAGCTGGCAAATTGTAACTCCCATCCACAACCACTATTCTAAACTGGTTGTCAAATTTTTCTATTACTTTTGATGTCAAATCTTGTCTGGTTTTACCTGTCATGGAACCAAAACACACCGCAATGCTCTTATATTGGCTTGCCCATATACAAAGGTCTTTGTCCCCGTCTTGAAC----TCTGTCAACCATCGTATTGGCATAACCTACGCAGCATGAAGTTTTGGATGTTTCCCACCATTTTGTCGTTTTGGGATGCAAG…	GTGGTTCAATAAAAACAACACAATCTTTTCGCAAAGCATTATGTGTTGTGCCACTTCCACCGTGTGTAATCACAATGTCAACACAACTAAACAACATATTGTAATTTGCCTCTCTCACTACTATGACGTTAGGTTTGTTCAATGGCTGTGGATAGCTCCCATCCACCACTATCATTTTGAATTGGCTGTCCAGTTTGTCTATTAACTTTGAAGTTAAATTTGCTCTAGTTTTGCCTGTCATAGACCCAAAGCATACAGCAATGCTTTTCATTTCACTTGCGAGAATGCAGAGCTCTTTGTCGCCCTCCTGAATAAAATCTGTCA----TTGTGTTGGCATAACCCATGCAACATGAAGTTTTGCATGTTCGCCACCATTTAGTCTTAGCTGGGTGTAGG…	450	14729	NC_027920.1 Hot pepper endornavirus isolate CS, complete genome
TRINITY_DN341_c1_g1_i1	AB597230.1	98.577	281	4	0	1	281	10305	10585	5.96e-138	489	AB597230.1	542	277	277	0	98.58	1	1	GGACTGTGTAGTGTTGATTCAACCACACTTTGGGGATCAGCTGGCATGGTTAAAATCGGTTGAACGGTTAAACTGTGGAGGAAGCTTATCAAAGGCATTGTCAATGCCTGCAGATAAGTTAATGCAAGAGTTCGCCACTTGGCAATGTAATGCCAAAATTGTGGGTGCACAAATAAGATCCGAGAAGTTTTACGTCAATCTGGTATCCAATAGTGTGACACTGTGGCAAAAAGCGGCGGACCACACAACCAATTTGTAGGCCGATGTTCGAGCACCAGTGC	GGACTGTGTAGTGTTGATTCAACCACACTTTGGGGATCAGCTGGCATGGTTAAAATCGGTTGAACGGTTAAACTGTGGAGGAAGCTTATCAAAGGCATTGTCAATGCCTGCAGATAAGTTAATGCAAGAGTTCGCCACTTGGCAATGTAATGCCAAAATTGTGGGTGCACAAATAAGATCCGAGAAGTTTTACGTCAATCTGGTATCCAATAGTGTGACACTGTGGCAAAAAGCGGCGGAACACACCACCAATTTGTTGGCCGATGTTCGAGAACCAGTGC	283	14727	AB597230.1 Bell pepper endornavirus genomic RNA, complete genome, host: Capsicum annuum cv. Kyosuzu
TRINITY_DN341_c1_g1_i1	JQ951943.1	98.577	281	4	0	1	281	10305	10585	5.96e-138	489	JQ951943.1	542	277	277	0	98.58	1	1	GGACTGTGTAGTGTTGATTCAACCACACTTTGGGGATCAGCTGGCATGGTTAAAATCGGTTGAACGGTTAAACTGTGGAGGAAGCTTATCAAAGGCATTGTCAATGCCTGCAGATAAGTTAATGCAAGAGTTCGCCACTTGGCAATGTAATGCCAAAATTGTGGGTGCACAAATAAGATCCGAGAAGTTTTACGTCAATCTGGTATCCAATAGTGTGACACTGTGGCAAAAAGCGGCGGACCACACAACCAATTTGTAGGCCGATGTTCGAGCACCAGTGC	GGACTGTGTAGTGTTGATTCAACCACACTTTGGGGATCAGCTGGCATGGTTAAAATCGGTTGAACGGTTAAACTGTGGAGGAAGCTTATCAAAGGCATTGTCAATGCCTGCAGATAAGTTAATGCAAGAGTTCGCCACTTGGCAATGTAATGCCAAAATTGTGGGTGCACAAATAAGATCCGAGAAGTTTTACGTCAATCTGGTATCCAATAGTGTGACACTGTGGCAAAAAGCGGCGGAACACACCACCAATTTGTTGGCCGATGTTCGAGAACCAGTGC	283	14727	JQ951943.1 Bell pepper endornavirus strain IS RNA-dependent RNA polymerase (RdRp) gene, complete cds
TRINITY_DN341_c1_g1_i1	KT149366.1	98.577	281	4	0	1	281	10305	10585	5.96e-138	489	KT149366.1	542	277	277	0	98.58	1	1	GGACTGTGTAGTGTTGATTCAACCACACTTTGGGGATCAGCTGGCATGGTTAAAATCGGTTGAACGGTTAAACTGTGGAGGAAGCTTATCAAAGGCATTGTCAATGCCTGCAGATAAGTTAATGCAAGAGTTCGCCACTTGGCAATGTAATGCCAAAATTGTGGGTGCACAAATAAGATCCGAGAAGTTTTACGTCAATCTGGTATCCAATAGTGTGACACTGTGGCAAAAAGCGGCGGACCACACAACCAATTTGTAGGCCGATGTTCGAGCACCAGTGC	GGACTGTGTAGTGTTGATTCAACCACACTTTGGGGATCAGCTGGCATGGTTAAAATCGGTTGAACGGTTAAACTGTGGAGGAAGCTTATCAAAGGCATTGTCAATGCCTGCAGATAAGTTAATGCAAGAGTTCGCCACTTGGCAATGTAATGCCAAAATTGTGGGTGCACAAATAAGATCCGAGAAGTTTTACGTCAATCTGGTATCCAATAGTGTGACACTGTGGCAAAAAGCGGCGGAACACACCACCAATTTGTTGGCCGATGTTCGAGAACCAGTGC	283	14726	KT149366.1 Bell pepper endornavirus, complete genome
TRINITY_DN341_c1_g1_i1	KP455654.1	98.577	281	4	0	1	281	10245	10525	5.96e-138	489	KP455654.1	542	277	277	0	98.58	1	1	GGACTGTGTAGTGTTGATTCAACCACACTTTGGGGATCAGCTGGCATGGTTAAAATCGGTTGAACGGTTAAACTGTGGAGGAAGCTTATCAAAGGCATTGTCAATGCCTGCAGATAAGTTAATGCAAGAGTTCGCCACTTGGCAATGTAATGCCAAAATTGTGGGTGCACAAATAAGATCCGAGAAGTTTTACGTCAATCTGGTATCCAATAGTGTGACACTGTGGCAAAAAGCGGCGGACCACACAACCAATTTGTAGGCCGATGTTCGAGCACCAGTGC	GGACTGTGTAGTGTTGATTCAACCACACTTTGGGGATCAGCTGGCATGGTTAAAATCGGTTGAACGGTTAAACTGTGGAGGAAGCTTATCAAAGGCATTGTCAATGCCTGCAGATAAGTTAATGCAAGAGTTCGCCACTTGGCAATGTAATGCCAAAATTGTGGGTGCACAAATAAGATCCGAGAAGTTTTACGTCAATCTGGTATCCAATAGTGTGACACTGTGGCAAAAAGCGGCGGAACACACCACCAATTTGTTGGCCGATGTTCGAGAACCAGTGC	283	14659	KP455654.1 Bell pepper endornavirus isolate Maor, complete genome
TRINITY_DN341_c1_g1_i1	KX525267.1	98.577	281	4	0	1	281	10309	10589	5.96e-138	489	KX525267.1	542	277	277	0	98.58	1	1	GGACTGTGTAGTGTTGATTCAACCACACTTTGGGGATCAGCTGGCATGGTTAAAATCGGTTGAACGGTTAAACTGTGGAGGAAGCTTATCAAAGGCATTGTCAATGCCTGCAGATAAGTTAATGCAAGAGTTCGCCACTTGGCAATGTAATGCCAAAATTGTGGGTGCACAAATAAGATCCGAGAAGTTTTACGTCAATCTGGTATCCAATAGTGTGACACTGTGGCAAAAAGCGGCGGACCACACAACCAATTTGTAGGCCGATGTTCGAGCACCAGTGC	GGACTGTGTAGTGTTGATTCAACCACACTTTGGGGATCAGCTGGCATGGTTAAAATCGGTTGAACGGTTAAACTGTGGAGGAAGCTTATCAAAGGCATTGTCAATGCCTGCAGATAAGTTAATGCAAGAGTTCGCCACTTGGCAATGTAATGCCAAAATTGTGGGTGCACAAATAAGATCCGAGAAGTTTTACGTCAATCTGGTATCCAATAGTGTGACACTGTGGCAAAAAGCGGCGGAACACACCACCAATTTGTTGGCCGATGTTCGAGAACCAGTGC	283	14790	KX525267.1 Bell pepper endornavirus isolate DR Polyprotein gene, complete cds
TRINITY_DN341_c1_g1_i1	KX977568.1	98.221	281	5	0	1	281	10312	10592	2.53e-136	484	KX977568.1	536	276	276	0	98.22	1	1	GGACTGTGTAGTGTTGATTCAACCACACTTTGGGGATCAGCTGGCATGGTTAAAATCGGTTGAACGGTTAAACTGTGGAGGAAGCTTATCAAAGGCATTGTCAATGCCTGCAGATAAGTTAATGCAAGAGTTCGCCACTTGGCAATGTAATGCCAAAATTGTGGGTGCACAAATAAGATCCGAGAAGTTTTACGTCAATCTGGTATCCAATAGTGTGACACTGTGGCAAAAAGCGGCGGACCACACAACCAATTTGTAGGCCGATGTTCGAGCACCAGTGC	GGACTGTGTAGTGTTGATTCAACCACACTTTGGGGATCAGCTAGCATGGTTAAAATCGGTTGAACGGTTAAACTGTGGAGGAAGCTTATCAAAGGCATTGTCAATGCCTGCAGATAAGTTAATGCAAGAGTTCGCCACTTGGCAATGTAATGCCAAAATTGTGGGTGCACAAATAAGATCCGAGAAGTTTTACGTCAATCTGGTATCCAATAGTGTGACACTGTGGCAAAAAGCGGCGGAACACACCACCAATTTGTTGGCCGATGTTCGAGAACCAGTGC	283	14727	KX977568.1 Bell pepper endornavirus isolate Santa Fe, complete genome
TRINITY_DN341_c1_g1_i1	KX977569.1	98.221	281	5	0	1	281	10306	10586	2.53e-136	484	KX977569.1	536	276	276	0	98.22	1	1	GGACTGTGTAGTGTTGATTCAACCACACTTTGGGGATCAGCTGGCATGGTTAAAATCGGTTGAACGGTTAAACTGTGGAGGAAGCTTATCAAAGGCATTGTCAATGCCTGCAGATAAGTTAATGCAAGAGTTCGCCACTTGGCAATGTAATGCCAAAATTGTGGGTGCACAAATAAGATCCGAGAAGTTTTACGTCAATCTGGTATCCAATAGTGTGACACTGTGGCAAAAAGCGGCGGACCACACAACCAATTTGTAGGCCGATGTTCGAGCACCAGTGC	GGACTGTGTAGTGTTGATTCAACCACACTTTGGGGATCAGCTAGCATGGTTAAAATCGGTTGAACGGTTAAACTGTGGAGGAAGCTTATCAAAGGCATTGTCAATGCCTGCAGATAAGTTAATGCAAGAGTTCGCCACTTGGCAATGTAATGCCAAAATTGTGGGTGCACAAATAAGATCCGAGAAGTTTTACGTCAATCTGGTATCCAATAGTGTGACACTGTGGCAAAAAGCGGCGGAACACACCACCAATTTGTTGGCCGATGTTCGAGAACCAGTGC	283	14714	KX977569.1 Bell pepper endornavirus isolate Penol, complete genome
TRINITY_DN341_c1_g1_i1	NC_015781.2	83.214	280	47	0	2	281	10307	10586	8.87e-79	293	NC_015781.2	324	233	233	0	83.21	1	1	GACTGTGTAGTGTTGATTCAACCACACTTTGGGGATCAGCTGGCATGGTTAAAATCGGTTGAACGGTTAAACTGTGGAGGAAGCTTATCAAAGGCATTGTCAATGCCTGCAGATAAGTTAATGCAAGAGTTCGCCACTTGGCAATGTAATGCCAAAATTGTGGGTGCACAAATAAGATCCGAGAAGTTTTACGTCAATCTGGTATCCAATAGTGTGACACTGTGGCAAAAAGCGGCGGACCACACAACCAATTTGTAGGCCGATGTTCGAGCACCAGTGC	GACTGTGTTGTGTTGATACAACCACACTTTGGAGACCAACTGGCATGGTTAAAGTCAGTTGAACGGTTAAACTGTGGCGGAAGTTTATCAAAAGTACTGTCAATGCCTGTTGAGAAAGTCATACACGAGTTTACCACTTGGCAATGCAATGCTAAAATCGTGGGTGCGCAGGTGAGATCCGAAAAATTTTTCGTTAATTTGGTATCAAATAGCGTGACGTTGTGGCAAAAGGCGGCAGAGCATACCACAAATTTGTTGGCCGATGTTCGAGAGCCAGTGC	283	14728	NC_015781.2 Bell pepper endornavirus, complete genome
TRINITY_DN545_c0_g1_i1	AB597230.1	99.24	263	2	0	1	263	4441	4703	6.3e-131	466	AB597230.1	516	261	261	0	99.24	1	1	GAGTGCAGCATGTTTACTTGGTTTGACTTGTACTTTTCATTAACCGAGTTACCACGAACGTTAACTATGTATGGGGACCCCCACCAAATAAGCACAATAGATACATTTATGCTAGGAGGGGAGAGAATATTAGACAACATAACAGATTATGTAGTCGAAAAGACCAATCTGAGATCAACGTTCAGATATGGGGCGAGTGTGTGTGCACTACTTTCTCCATTGGTGTGTGAATTGTCAAGCAAAGCCAAACATGACACAAAGGT	GAGTGCAGCATGTTTACTTGGTTTGACTTGTACTTTTCATTAACCGAGTTACCACGAACGTTAACTATGTATGGGGACCCCCACCAAATAAGCACAATAGATACATTTATGCTAGGAGGGGAGAGAATATTAGACAACATAACAGATTATGTAGTCGAAAAGACCAATCTGAGATCAACGTTCAGATATGGGGCTAGTGTGTGTGCACTACTTTCTCCATTGGTGGGTGAATTGTCAAGCAAAGCCAAACATGACACAAAGGT	264	14727	AB597230.1 Bell pepper endornavirus genomic RNA, complete genome, host: Capsicum annuum cv. Kyosuzu
TRINITY_DN545_c0_g1_i1	JQ951943.1	99.24	263	2	0	1	263	4441	4703	6.3e-131	466	JQ951943.1	516	261	261	0	99.24	1	1	GAGTGCAGCATGTTTACTTGGTTTGACTTGTACTTTTCATTAACCGAGTTACCACGAACGTTAACTATGTATGGGGACCCCCACCAAATAAGCACAATAGATACATTTATGCTAGGAGGGGAGAGAATATTAGACAACATAACAGATTATGTAGTCGAAAAGACCAATCTGAGATCAACGTTCAGATATGGGGCGAGTGTGTGTGCACTACTTTCTCCATTGGTGTGTGAATTGTCAAGCAAAGCCAAACATGACACAAAGGT	GAGTGCAGCATGTTTACTTGGTTTGACTTGTACTTTTCATTAACCGAGTTACCACGAACGTTAACTATGTATGGGGACCCCCACCAAATAAGCACAATAGATACATTTATGCTAGGAGGGGAGAGAATATTAGACAACATAACAGATTATGTAGTCGAAAAGACCAATCTGAGATCAACGTTCAGATATGGGGCTAGTGTGTGTGCACTACTTTCTCCATTGGTGGGTGAATTGTCAAGCAAAGCCAAACATGACACAAAGGT	264	14727	JQ951943.1 Bell pepper endornavirus strain IS RNA-dependent RNA polymerase (RdRp) gene, complete cds
TRINITY_DN545_c0_g1_i1	KX977568.1	99.24	263	2	0	1	263	4448	4710	6.3e-131	466	KX977568.1	516	261	261	0	99.24	1	1	GAGTGCAGCATGTTTACTTGGTTTGACTTGTACTTTTCATTAACCGAGTTACCACGAACGTTAACTATGTATGGGGACCCCCACCAAATAAGCACAATAGATACATTTATGCTAGGAGGGGAGAGAATATTAGACAACATAACAGATTATGTAGTCGAAAAGACCAATCTGAGATCAACGTTCAGATATGGGGCGAGTGTGTGTGCACTACTTTCTCCATTGGTGTGTGAATTGTCAAGCAAAGCCAAACATGACACAAAGGT	GAGTGCAGCATGTTTACTTGGTTTGACTTGTACTTTTCATTAACCGAGTTACCACGAACGTTAACTATGTATGGGGACCCCCACCAAATAAGCACAATAGATACATTTATGCTAGGAGGGGAGAGAATATTAGACAACATAACAGATTATGTAGTCGAAAAGACCAATCTGAGATCAACGTTCAGATATGGGGCTAGTGTGTGTGCACTACTTTCTCCATTGGTGGGTGAATTGTCAAGCAAAGCCAAACATGACACAAAGGT	264	14727	KX977568.1 Bell pepper endornavirus isolate Santa Fe, complete genome
TRINITY_DN545_c0_g1_i1	KX977569.1	99.24	263	2	0	1	263	4442	4704	6.3e-131	466	KX977569.1	516	261	261	0	99.24	1	1	GAGTGCAGCATGTTTACTTGGTTTGACTTGTACTTTTCATTAACCGAGTTACCACGAACGTTAACTATGTATGGGGACCCCCACCAAATAAGCACAATAGATACATTTATGCTAGGAGGGGAGAGAATATTAGACAACATAACAGATTATGTAGTCGAAAAGACCAATCTGAGATCAACGTTCAGATATGGGGCGAGTGTGTGTGCACTACTTTCTCCATTGGTGTGTGAATTGTCAAGCAAAGCCAAACATGACACAAAGGT	GAGTGCAGCATGTTTACTTGGTTTGACTTGTACTTTTCATTAACCGAGTTACCACGAACGTTAACTATGTATGGGGACCCCCACCAAATAAGCACAATAGATACATTTATGCTAGGAGGGGAGAGAATATTAGACAACATAACAGATTATGTAGTCGAAAAGACCAATCTGAGATCAACGTTCAGATATGGGGCTAGTGTGTGTGCACTACTTTCTCCATTGGTGGGTGAATTGTCAAGCAAAGCCAAACATGACACAAAGGT	264	14714	KX977569.1 Bell pepper endornavirus isolate Penol, complete genome
TRINITY_DN545_c0_g1_i1	KT149366.1	98.859	263	3	0	1	263	4441	4703	2.68e-129	461	KT149366.1	510	260	260	0	98.86	1	1	GAGTGCAGCATGTTTACTTGGTTTGACTTGTACTTTTCATTAACCGAGTTACCACGAACGTTAACTATGTATGGGGACCCCCACCAAATAAGCACAATAGATACATTTATGCTAGGAGGGGAGAGAATATTAGACAACATAACAGATTATGTAGTCGAAAAGACCAATCTGAGATCAACGTTCAGATATGGGGCGAGTGTGTGTGCACTACTTTCTCCATTGGTGTGTGAATTGTCAAGCAAAGCCAAACATGACACAAAGGT	GAGTGCAGCATGTTTACTTGGTTTGACTTGTACTTTTCATTAACCGAGTTACCACGAACGTTAACTATGTATGGGGACCCCCACCAAATAAGCACAATAGATACATTTATGCTAGGAGGGGAGAGAATATTAGACAACATAACAGATTATGTAGTCGAAAAGACCAATCTGAGATCAACGTTCAGATATGGGGCTAGTGTGTGTGCACTACTTTCTCCATTAGTGGGTGAATTGTCAAGCAAAGCCAAACATGACACAAAGGT	264	14726	KT149366.1 Bell pepper endornavirus, complete genome
TRINITY_DN545_c0_g1_i1	KX525267.1	98.859	263	3	0	1	263	4445	4707	2.68e-129	461	KX525267.1	510	260	260	0	98.86	1	1	GAGTGCAGCATGTTTACTTGGTTTGACTTGTACTTTTCATTAACCGAGTTACCACGAACGTTAACTATGTATGGGGACCCCCACCAAATAAGCACAATAGATACATTTATGCTAGGAGGGGAGAGAATATTAGACAACATAACAGATTATGTAGTCGAAAAGACCAATCTGAGATCAACGTTCAGATATGGGGCGAGTGTGTGTGCACTACTTTCTCCATTGGTGTGTGAATTGTCAAGCAAAGCCAAACATGACACAAAGGT	GAGTGCAGCATGTTTACTTGGTTTGACTTGTACTTTTCATTAACCGAGTTACCACGAACGTTAACTATGTATGGGGACCCCCACCAAATAAGCACAATAGATACATTTATGCTAGGAGGGGAGAGAATATTAGACAACATAACAGATTATGTAGTCGAAAAGACCAATCTGAGATCAACGTTCAGATATGGGGCTAGTGTGTGTGCACTACTTTCTCCATTAGTGGGTGAATTGTCAAGCAAAGCCAAACATGACACAAAGGT	264	14790	KX525267.1 Bell pepper endornavirus isolate DR Polyprotein gene, complete cds
TRINITY_DN545_c0_g1_i1	KP455654.1	98.479	263	4	0	1	263	4381	4643	3.26e-128	457	KP455654.1	506	259	259	0	98.48	1	1	GAGTGCAGCATGTTTACTTGGTTTGACTTGTACTTTTCATTAACCGAGTTACCACGAACGTTAACTATGTATGGGGACCCCCACCAAATAAGCACAATAGATACATTTATGCTAGGAGGGGAGAGAATATTAGACAACATAACAGATTATGTAGTCGAAAAGACCAATCTGAGATCAACGTTCAGATATGGGGCGAGTGTGTGTGCACTACTTTCTCCATTGGTGTGTGAATTGTCAAGCAAAGCCAAACATGACACAAAGGT	GAGTGCAGCATGTTTACTTGGTTTGACTTGTACTTTTCATTAACCGAGTTACCACGAACGTTAACTATGTATGGGGACCCCCACCAAATAAGCACAATAGATACATTTATGCTAGGAGGGGAGAGAATATTAGACAACATAACAGATTATGTAGTCGAAAAGACCAATCTAAGATCAACGTTCAGATATGGGGCTAGTGTGTGTGCACTACTTTCTCCATTAGTGGGTGAATTGTCAAGCAAAGCCAAACATGACACAAAGGT	264	14659	KP455654.1 Bell pepper endornavirus isolate Maor, complete genome
TRINITY_DN545_c0_g1_i1	NC_015781.2	90.875	263	24	0	1	263	4442	4704	4.54e-101	367	NC_015781.2	406	239	239	0	90.87	1	1	GAGTGCAGCATGTTTACTTGGTTTGACTTGTACTTTTCATTAACCGAGTTACCACGAACGTTAACTATGTATGGGGACCCCCACCAAATAAGCACAATAGATACATTTATGCTAGGAGGGGAGAGAATATTAGACAACATAACAGATTATGTAGTCGAAAAGACCAATCTGAGATCAACGTTCAGATATGGGGCGAGTGTGTGTGCACTACTTTCTCCATTGGTGTGTGAATTGTCAAGCAAAGCCAAACATGACACAAAGGT	GAGTGCAGCATGTTCACTTGGTTCGATTTGTACTTTTCATTAATAGAGTTACCACGTACGTTAACCATGTATGGGGACCCCCATCAAATAAGTACAATAGATACTTTCATGCTCGGAGGAGAGAGAATACTAGACAACATAACAGACTATGTAATGGAGAAGACCAATCTGAGATCAACGTTCAGATATGGGGCTAGTGTGTGTGCACTACTGTCCCCATTGGTGGGTGAATTGTCAAGCAAAGCTAAACACGACACAAAGGT	264	14728	NC_015781.2 Bell pepper endornavirus, complete genome
TRINITY_DN545_c0_g1_i1	NC_027920.1	78.244	262	55	2	1	261	4442	4702	2.69e-53	208	NC_027920.1	230	205	205	2	78.24	1	1	GAGTGCAGCATGTTTACTTGGTTTGACTTGTACTTTTCATTAACCGAGTTACCACGAACGTTAACTATGTATGGGGACCCCCACCAAATAAGCACAATAGATACATTTATGCTAGGAGGGGAGAGAATATTAGACAACATAACAGATTATG-TAGTCGAAAAGACCAATCTGAGATCAACGTTCAGATATGGGGCGAGTGTGTGTGCACTACTTTCTCCATTGGTGTGTGAATTGTCAAGCAAAGCCAAACATGACACAAAG	GAATGCAGCATGTTCACATGGTTTGATTTGTACTTTTCATTGGTGGATTTACCACGCTCTTTAACTATGTACGGGGACCCTCATCAGATAAGTACTATTGATACATTCATGTTGGGCGGCGAACGCATACTGGACAACATCACAGATTACGTTATAAGCAAACA-CACGCTTAAAACAACATACAGATATGGTGCTAGCATCTGTGCACTACTATCCCCAATAGTGGGTGAACTGTCAAGCAAAGCAAAACATGACACAAAG	264	14729	NC_027920.1 Hot pepper endornavirus isolate CS, complete genome
TRINITY_DN617_c0_g1_i1	NC_007537.1	70.204	245	70	3	43	286	644	402	3.24e-21	102	NC_007537.1	112	172	172	3	70.2	1	-1	ACGAGTGTAAGTACAAGGTCTTTGCGTTGTGGATTAAGTGGTG-GGATAGTGATTTGTTCTCGGTTGAAATCGGTAAAGGTAGCGTCTGTAGTGCCAAGTGGGCGGCAGTATTTATCAGTGTACGGTTTGTAGTGAGAGTATTTGCGGTCGAGAAGATACTTGATGAGAGGGGGGAGTTCAAATCCAGATTCAGGAAGATAGTCAGTGGTGTAAACGAGTTGTCCAGTGTGGTAACGGTAAGGGA	ACGAGTGGAAGGACCATGTTCTTGCGTGTTTCATCAATAGGGGCGGAGGGT-ATCTGTTCGCGATTAAAGTCGGAGAAAGTAGCGTTAGTTGTGCCAAGAGGTCGACAGTATTTGTCAATGTATGGGCGATAGTGTAGCCATTTCGTTTTGGTGAGATAATCGATGAGAGGATGGAGTGAGAAACCGGAGTCGGGGAGTTCGTCAGTTGTTTCAACTATTTGTCCAGTGTGGTAGCGG-AAGGGA	294	2299	NC_007537.1 Rosellinia necatrix partitivirus 1-W8 segment 1, complete genome
TRINITY_DN617_c0_g1_i1	NC_003801.1	75.806	62	15	0	94	155	687	626	0.000762	44.6	NC_003801.1	48	47	47	0	75.81	1	-1	ATTTGTTCTCGGTTGAAATCGGTAAAGGTAGCGTCTGTAGTGCCAAGTGGGCGGCAGTATTT	ATTTGTTCCTTGTTAAAGTCGCGGAAGGTAGCGTCGGTAGTACCTGCGGGGCGGCAATATTT	294	2363	NC_003801.1 Rhizoctonia solani virus 717 RNA1, complete genome
TRINITY_DN636_c0_g1_i1	EU413670.1	81.633	49	9	0	523	571	2765	2717	0.000157	48.2	EU413670.1	52	40	40	0	81.63	1	-1	AGGTGATTAATATTGTGATGATTCCAGGGATTGTCAACCGCCATGGATA	AGATGGTTAATATTGTGGTGATTGAATGGATTGTCTACAACCATGGATA	697	3437	EU413670.1 Southern tomato virus isolate MS-7, complete genome
TRINITY_DN636_c0_g1_i1	NC_011591.1	81.633	49	9	0	523	571	2765	2717	0.000157	48.2	NC_011591.1	52	40	40	0	81.63	1	-1	AGGTGATTAATATTGTGATGATTCCAGGGATTGTCAACCGCCATGGATA	AGATGGTTAATATTGTGGTGATTGAATGGATTGTCTACAACCATGGATA	697	3437	NC_011591.1 Southern tomato virus, complete genome
TRINITY_DN636_c0_g1_i1	KT438549.1	81.633	49	9	0	523	571	2766	2718	0.000157	48.2	KT438549.1	52	40	40	0	81.63	1	-1	AGGTGATTAATATTGTGATGATTCCAGGGATTGTCAACCGCCATGGATA	AGATGGTTAATATTGTGGTGATTGAATGGATTGTCTACAACCATGGATA	697	3463	KT438549.1 Southern tomato virus isolate CN-12, complete genome
TRINITY_DN636_c0_g1_i1	KT852573.1	81.633	49	9	0	523	571	2766	2718	0.000157	48.2	KT852573.1	52	40	40	0	81.63	1	-1	AGGTGATTAATATTGTGATGATTCCAGGGATTGTCAACCGCCATGGATA	AGATGGTTAATATTGTGGTGATTGAATGGATTGTCTACAACCATGGATA	697	3438	KT852573.1 Southern tomato virus isolate NC12-03-08, complete genome
TRINITY_DN636_c0_g1_i1	KT634055.1	81.633	49	9	0	523	571	2766	2718	0.000157	48.2	KT634055.1	52	40	40	0	81.63	1	-1	AGGTGATTAATATTGTGATGATTCCAGGGATTGTCAACCGCCATGGATA	AGATGGTTAATATTGTGGTGATTGAATGGATTGTCTACAACCATGGATA	697	3438	KT634055.1 Southern tomato virus isolate BD-13, complete genome
TRINITY_DN636_c0_g1_i1	KJ174690.1	81.633	49	9	0	523	571	2754	2706	0.000157	48.2	KJ174690.1	52	40	40	0	81.63	1	-1	AGGTGATTAATATTGTGATGATTCCAGGGATTGTCAACCGCCATGGATA	AGATGGTTAATATTGTGGTGATTGAATGGATTGTCTACAACCATGGATA	697	3426	KJ174690.1 Southern tomato virus isolate GCN06, complete genome
TRINITY_DN636_c0_g1_i1	KX949574.1	81.633	49	9	0	523	571	2761	2713	0.000157	48.2	KX949574.1	52	40	40	0	81.63	1	-1	AGGTGATTAATATTGTGATGATTCCAGGGATTGTCAACCGCCATGGATA	AGATGGTTAATATTGTGGTGATTGAATGGATTGTCTACAACCATGGATA	697	3433	KX949574.1 Southern tomato virus isolate Florida, complete genome
TRINITY_DN636_c0_g1_i1	LC270272.1	81.633	49	9	0	523	571	2766	2718	0.000157	48.2	LC270272.1	52	40	40	0	81.63	1	-1	AGGTGATTAATATTGTGATGATTCCAGGGATTGTCAACCGCCATGGATA	AGATGGTTAATATTGTGGTGATTGAATGGATTGTCTACAACCATGGATA	697	3438	LC270272.1 Southern tomato virus genomic RNA, complete genome, isolate: Gimcheon
TRINITY_DN636_c0_g1_i1	KY228384.1	81.633	49	9	0	523	571	2765	2717	0.000157	48.2	KY228384.1	52	40	40	0	81.63	1	-1	AGGTGATTAATATTGTGATGATTCCAGGGATTGTCAACCGCCATGGATA	AGATGGTTAATATTGTGGTGATTGAATGGATTGTCTACAACCATGGATA	697	3437	KY228384.1 Southern tomato virus isolate XJ-p, complete genome
TRINITY_DN636_c0_g1_i1	KX525266.1	81.633	49	9	0	523	571	2753	2705	0.000157	48.2	KX525266.1	52	40	40	0	81.63	1	-1	AGGTGATTAATATTGTGATGATTCCAGGGATTGTCAACCGCCATGGATA	AGATGGTTAATATTGTGGTGATTGAATGGATTGTCTACAACCATGGATA	697	3425	KX525266.1 UNVERIFIED: Southern tomato virus isolate DR Putative coat protein and Phusion protein RdRp genes, complete cds
TRINITY_DN636_c1_g1_i1	EU413670.1	66.543	269	84	4	167	432	2432	2167	1.32e-10	68	EU413670.1	74	179	179	6	66.54	1	-1	ACATGGAAGGGAGGTCTGTGAATCAGGAAGTCCTTCTCCTCTATCCCTGCGAGGAACCATTCATTGAGTACCACCCTCAGCTTCTGCAAG-ATACGATCCCCAGGATCCCTGTAAAACAATGTGAGATTATCATCACCAGCGCATTTCGGGAC--CAATGTCGGGTAACTCATCCCTAGTTTGTGGCATGCCGCTATGATATACAGGATGTTGAGGGCCGTGTCGAGCCATCCCGTCCATAGTGAACCGCTAGGCACCATACCATCGAT	ACATGGAAGGGAGGCCGGGTAATGATGAAGTCCTCTTTCTTAATCCCAGCCCTAAAATAATCATTCAGCTTAACCCTCA-TTTCTTCGAGCACTTCATCTCCAGGATCCTTACTGAAGACCGTTAGATTGTCATCCCCGGCGCACTTCGGGACCGCCTCCTCCTCCAATATATCAATAGACCGAAGAA--CGGACTTAATATACAAGATGTTTAAAGCCGTGTCCAACCATCCAGTCCAGAGTGACCCACTTGGTACCATCCCGTCAAT	555	3437	EU413670.1 Southern tomato virus isolate MS-7, complete genome
TRINITY_DN636_c1_g1_i1	NC_011591.1	66.543	269	84	4	167	432	2432	2167	1.32e-10	68	NC_011591.1	74	179	179	6	66.54	1	-1	ACATGGAAGGGAGGTCTGTGAATCAGGAAGTCCTTCTCCTCTATCCCTGCGAGGAACCATTCATTGAGTACCACCCTCAGCTTCTGCAAG-ATACGATCCCCAGGATCCCTGTAAAACAATGTGAGATTATCATCACCAGCGCATTTCGGGAC--CAATGTCGGGTAACTCATCCCTAGTTTGTGGCATGCCGCTATGATATACAGGATGTTGAGGGCCGTGTCGAGCCATCCCGTCCATAGTGAACCGCTAGGCACCATACCATCGAT	ACATGGAAGGGAGGCCGGGTAATGATGAAGTCCTCTTTCTTAATCCCAGCCCTAAAATAATCATTCAGCTTAACCCTCA-TTTCTTCGAGCACTTCATCTCCAGGATCCTTACTGAAGACCGTTAGATTGTCATCCCCGGCGCACTTCGGGACCGCCTCCTCCTCCAATATATCAATAGACCGAAGAA--CGGACTTAATATACAAGATGTTTAAAGCCGTGTCCAACCATCCAGTCCAGAGTGACCCACTTGGTACCATCCCGTCAAT	555	3437	NC_011591.1 Southern tomato virus, complete genome
TRINITY_DN636_c1_g1_i1	KT438549.1	66.543	269	84	4	167	432	2433	2168	1.32e-10	68	KT438549.1	74	179	179	6	66.54	1	-1	ACATGGAAGGGAGGTCTGTGAATCAGGAAGTCCTTCTCCTCTATCCCTGCGAGGAACCATTCATTGAGTACCACCCTCAGCTTCTGCAAG-ATACGATCCCCAGGATCCCTGTAAAACAATGTGAGATTATCATCACCAGCGCATTTCGGGAC--CAATGTCGGGTAACTCATCCCTAGTTTGTGGCATGCCGCTATGATATACAGGATGTTGAGGGCCGTGTCGAGCCATCCCGTCCATAGTGAACCGCTAGGCACCATACCATCGAT	ACATGGAAGGGAGGCCGGGTAATGATGAAGTCCTCTTTCTTAATCCCAGCCCTAAAATAATCATTCAGCTTAACCCTCA-TTTCTTCGAGCACCTCATCTCCAGGATCCTTACTGAAGACCGTTAGATTGTCATCTCCGGCGCACTTCGGGACCGCCTCCTCCTCCAATATATCAATAGACCGAAGAA--CGGACTTAATATACAAGATGTTTAAAGCCGTGTCCAACCATCCAGTCCAGAGTGACCCACTTGGTACCATCCCGTCAAT	555	3463	KT438549.1 Southern tomato virus isolate CN-12, complete genome
TRINITY_DN636_c1_g1_i1	KT852573.1	66.543	269	84	4	167	432	2433	2168	1.32e-10	68	KT852573.1	74	179	179	6	66.54	1	-1	ACATGGAAGGGAGGTCTGTGAATCAGGAAGTCCTTCTCCTCTATCCCTGCGAGGAACCATTCATTGAGTACCACCCTCAGCTTCTGCAAG-ATACGATCCCCAGGATCCCTGTAAAACAATGTGAGATTATCATCACCAGCGCATTTCGGGAC--CAATGTCGGGTAACTCATCCCTAGTTTGTGGCATGCCGCTATGATATACAGGATGTTGAGGGCCGTGTCGAGCCATCCCGTCCATAGTGAACCGCTAGGCACCATACCATCGAT	ACATGGAAGGGAGGCCGGGTAATGATGAAGTCCTCTTTCTTAATCCCAGCCCTAAAATAATCATTCAGCTTAACCCTCA-TTTCTTCGAGCACTTCATCTCCAGGATCCTTACTGAAGACCGTTAGATTGTCATCCCCGGCGCACTTCGGGACCGCCTCCTCCTCCAATATATCAATAGACCGAAGAA--CGGACTTAATATACAAGATGTTTAAAGCCGTGTCCAACCATCCAGTCCAGAGTGACCCACTTGGTACCATCCCGTCAAT	555	3438	KT852573.1 Southern tomato virus isolate NC12-03-08, complete genome
TRINITY_DN636_c1_g1_i1	KT634055.1	66.543	269	84	4	167	432	2433	2168	1.32e-10	68	KT634055.1	74	179	179	6	66.54	1	-1	ACATGGAAGGGAGGTCTGTGAATCAGGAAGTCCTTCTCCTCTATCCCTGCGAGGAACCATTCATTGAGTACCACCCTCAGCTTCTGCAAG-ATACGATCCCCAGGATCCCTGTAAAACAATGTGAGATTATCATCACCAGCGCATTTCGGGAC--CAATGTCGGGTAACTCATCCCTAGTTTGTGGCATGCCGCTATGATATACAGGATGTTGAGGGCCGTGTCGAGCCATCCCGTCCATAGTGAACCGCTAGGCACCATACCATCGAT	ACATGGAAGGGAGGCCGGGTAATGATGAAGTCCTCTTTCTTAATCCCAGCCCTAAAATAATCATTCAGCTTAACCCTCA-TTTCTTCGAGCACTTCATCTCCAGGATCCTTACTGAAGACCGTTAGATTGTCATCCCCGGCGCACTTCGGGACCGCCTCCTCCTCCAATATATCAATAGACCGAAGAA--CGGACTTAATATACAAGATGTTTAAAGCCGTGTCCAACCATCCAGTCCAGAGTGACCCACTTGGTACCATCCCGTCAAT	555	3438	KT634055.1 Southern tomato virus isolate BD-13, complete genome
TRINITY_DN636_c1_g1_i1	KJ174690.1	66.543	269	84	4	167	432	2421	2156	1.32e-10	68	KJ174690.1	74	179	179	6	66.54	1	-1	ACATGGAAGGGAGGTCTGTGAATCAGGAAGTCCTTCTCCTCTATCCCTGCGAGGAACCATTCATTGAGTACCACCCTCAGCTTCTGCAAG-ATACGATCCCCAGGATCCCTGTAAAACAATGTGAGATTATCATCACCAGCGCATTTCGGGAC--CAATGTCGGGTAACTCATCCCTAGTTTGTGGCATGCCGCTATGATATACAGGATGTTGAGGGCCGTGTCGAGCCATCCCGTCCATAGTGAACCGCTAGGCACCATACCATCGAT	ACATGGAAGGGAGGCCGGGTAATGATGAAGTCCTCTTTCTTAATCCCAGCCCTAAAATAATCATTCAGCTTAACCCTCA-TTTCTTCGAGCACTTCATCTCCAGGATCCTTACTGAAGACCGTTAGATTGTCATCCCCGGCGCACTTCGGGACCGCCTCCTCCTCCAATATATCAATAGACCGAAGAA--CGGACTTAATATACAAGATGTTTAAAGCCGTGTCCAACCATCCAGTCCAGAGTGACCCACTTGGTACCATCCCGTCAAT	555	3426	KJ174690.1 Southern tomato virus isolate GCN06, complete genome
TRINITY_DN636_c1_g1_i1	KX949574.1	66.543	269	84	4	167	432	2428	2163	1.32e-10	68	KX949574.1	74	179	179	6	66.54	1	-1	ACATGGAAGGGAGGTCTGTGAATCAGGAAGTCCTTCTCCTCTATCCCTGCGAGGAACCATTCATTGAGTACCACCCTCAGCTTCTGCAAG-ATACGATCCCCAGGATCCCTGTAAAACAATGTGAGATTATCATCACCAGCGCATTTCGGGAC--CAATGTCGGGTAACTCATCCCTAGTTTGTGGCATGCCGCTATGATATACAGGATGTTGAGGGCCGTGTCGAGCCATCCCGTCCATAGTGAACCGCTAGGCACCATACCATCGAT	ACATGGAAGGGAGGCCGGGTAATGATGAAGTCCTCTTTCTTAATCCCAGCCCTAAAATAATCATTCAGCTTAACCCTCA-TTTCTTCGAGCACTTCATCTCCAGGATCCTTACTGAAGACCGTTAGATTGTCATCCCCGGCGCACTTCGGGACCGCCTCCTCCTCCAATATATCAATAGACCGAAGAA--CGGACTTAATATACAAGATGTTTAAAGCCGTGTCCAACCATCCAGTCCAGAGTGACCCACTTGGTACCATCCCGTCAAT	555	3433	KX949574.1 Southern tomato virus isolate Florida, complete genome
TRINITY_DN636_c1_g1_i1	LC270272.1	66.543	269	84	4	167	432	2433	2168	1.32e-10	68	LC270272.1	74	179	179	6	66.54	1	-1	ACATGGAAGGGAGGTCTGTGAATCAGGAAGTCCTTCTCCTCTATCCCTGCGAGGAACCATTCATTGAGTACCACCCTCAGCTTCTGCAAG-ATACGATCCCCAGGATCCCTGTAAAACAATGTGAGATTATCATCACCAGCGCATTTCGGGAC--CAATGTCGGGTAACTCATCCCTAGTTTGTGGCATGCCGCTATGATATACAGGATGTTGAGGGCCGTGTCGAGCCATCCCGTCCATAGTGAACCGCTAGGCACCATACCATCGAT	ACATGGAAGGGAGGCCGGGTAATGATGAAGTCCTCTTTCTTAATCCCAGCCCTAAAATAATCATTCAGCTTAACCCTCA-TTTCTTCGAGCACTTCATCTCCAGGATCCTTACTGAAGACCGTTAGATTGTCATCCCCGGCGCACTTCGGGACCGCCTCCTCCTCCAATATATCAATAGACCGAAGAA--CGGACTTAATATACAAGATGTTTAAAGCCGTGTCCAACCATCCAGTCCAGAGTGACCCACTTGGTACCATCCCGTCAAT	555	3438	LC270272.1 Southern tomato virus genomic RNA, complete genome, isolate: Gimcheon
TRINITY_DN636_c1_g1_i1	KY228384.1	66.543	269	84	4	167	432	2432	2167	1.32e-10	68	KY228384.1	74	179	179	6	66.54	1	-1	ACATGGAAGGGAGGTCTGTGAATCAGGAAGTCCTTCTCCTCTATCCCTGCGAGGAACCATTCATTGAGTACCACCCTCAGCTTCTGCAAG-ATACGATCCCCAGGATCCCTGTAAAACAATGTGAGATTATCATCACCAGCGCATTTCGGGAC--CAATGTCGGGTAACTCATCCCTAGTTTGTGGCATGCCGCTATGATATACAGGATGTTGAGGGCCGTGTCGAGCCATCCCGTCCATAGTGAACCGCTAGGCACCATACCATCGAT	ACATGGAAGGGAGGCCGGGTAATGATGAAGTCCTCTTTCTTAATCCCAGCCCTAAAATAATCATTCAGCTTAACCCTCA-TTTCTTCGAGCACTTCATCTCCAGGATCCTTACTGAAGACCGTTAGATTGTCATCCCCGGCGCACTTCGGGACCGCCTCCTCCTCCAATATATCAATAGACCGAAGAA--CGGACTTAATATACAAGATGTTTAAAGCCGTGTCCAACCATCCAGTCCAGAGTGACCCACTTGGTACCATCCCGTCAAT	555	3437	KY228384.1 Southern tomato virus isolate XJ-p, complete genome
TRINITY_DN636_c1_g1_i1	KX525266.1	66.543	269	84	4	167	432	2420	2155	1.32e-10	68	KX525266.1	74	179	179	6	66.54	1	-1	ACATGGAAGGGAGGTCTGTGAATCAGGAAGTCCTTCTCCTCTATCCCTGCGAGGAACCATTCATTGAGTACCACCCTCAGCTTCTGCAAG-ATACGATCCCCAGGATCCCTGTAAAACAATGTGAGATTATCATCACCAGCGCATTTCGGGAC--CAATGTCGGGTAACTCATCCCTAGTTTGTGGCATGCCGCTATGATATACAGGATGTTGAGGGCCGTGTCGAGCCATCCCGTCCATAGTGAACCGCTAGGCACCATACCATCGAT	ACATGGAAGGGAGGCCGGGTAATGATGAAGTCCTCTTTCTTAATCCCAGCCCTAAAATAATCATTCAGCTTAACCCTCA-TTTCTTCGAGCACTTCATCTCCAGGATCCTTACTGAAGACCGTTAGATTGTCATCCCCGGCGCACTTCGGGACCGCCTCCTCCTCCAATATATCAATAGACCGAAGAA--CGGACTTAATATACAAGATGTTTAAAGCCGTGTCCAACCATCCAGTCCAGAGTGACCCACTTGGTACCATCCCGTCAAT	555	3425	KX525266.1 UNVERIFIED: Southern tomato virus isolate DR Putative coat protein and Phusion protein RdRp genes, complete cds
TRINITY_DN654_c0_g1_i1	NC_033774.1	84.483	58	6	3	93	149	8858	8913	1.62e-06	53.6	NC_033774.1	58	49	49	3	84.48	1	1	TTTTATCTAATAAATACACCCCTTCC-GAAGTCGAGGTTTTTAGCATGTATTAGCTCT	TTTTATCTAATAAATGCATCCCTTCCAGAAGTCGGGGTTTGTTGCACG-ATT-GCTCT	321	8913	NC_033774.1 Pepper chlorotic spot virus isolate 14YV733 segment L, complete sequence
TRINITY_DN731_c0_g1_i1	JQ951943.1	99.483	387	2	0	1	387	11806	12192	0	690	JQ951943.1	764	385	385	0	99.48	1	1	ACAGCAGAAAAAGCTTGGGTCGAATTGAACACTAATTATACTAGACAAGAATTTTTACACAAACTGCAAGGTACAAATTTAGTGCACACCGCAGACAGAATGGAACAACCAATATTTCTAGCCAGATGCCAACAAAGTTGGTCAGCAATATTTTGTAATGAAAAGATTGTACCAGATCGTTGGTACTGGATAAATGACGGCACATGTTGGGACGGTGCAGTATCCGTGGAATTGAACAAACAAAGCTTTTTATTAACCAATAGCGCAGACCGAAATTGGAACCGAGACATAGTTACGTTCAGGACAGACATACGCCTAGGAATAGGGAAAAGTACACAAAAGCGCAAGCCAATTAAAAAGAAAATAATAATACCAGGTGAAAGCAAG	ACAGCAGAAAAAGCTTGGGTCGAGTTGAACACTAATTATACTAGACAAGAATTTTTACACAAACTGCAAGGTACAAATTTAGTGCACACCGCAGACAGAATGGAACAACCAATATTTCTAGCCAGATGCCAACAAAGTTGGTCAGCAATATTTTGTAATGAAAAGATTGTACCAGATCGTTGGTACTGGATAAATGACGGCACATGTTGGGACGGTGCAGTATCCGTGGAATTGAACAAACAAAGCTTTTTATTAACCAATAGCGCAGACCGAAATTGGAACCGAGACATAGTCACGTTCAGGACAGACATACGCCTAGGAATAGGGAAAAGTACACAAAAGCGCAAGCCAATTAAAAAGAAAATAATAATACCAGGTGAAAGCAAG	387	14727	JQ951943.1 Bell pepper endornavirus strain IS RNA-dependent RNA polymerase (RdRp) gene, complete cds
TRINITY_DN731_c0_g1_i1	KT149366.1	99.483	387	2	0	1	387	11806	12192	0	690	KT149366.1	764	385	385	0	99.48	1	1	ACAGCAGAAAAAGCTTGGGTCGAATTGAACACTAATTATACTAGACAAGAATTTTTACACAAACTGCAAGGTACAAATTTAGTGCACACCGCAGACAGAATGGAACAACCAATATTTCTAGCCAGATGCCAACAAAGTTGGTCAGCAATATTTTGTAATGAAAAGATTGTACCAGATCGTTGGTACTGGATAAATGACGGCACATGTTGGGACGGTGCAGTATCCGTGGAATTGAACAAACAAAGCTTTTTATTAACCAATAGCGCAGACCGAAATTGGAACCGAGACATAGTTACGTTCAGGACAGACATACGCCTAGGAATAGGGAAAAGTACACAAAAGCGCAAGCCAATTAAAAAGAAAATAATAATACCAGGTGAAAGCAAG	ACAGCAGAAAAAGCTTGGGTCGAGTTGAACACTAATTATACTAGACAAGAATTTTTACACAAACTGCAAGGTACAAATTTAGTGCACACCGCAGACAGAATGGAACAACCAATATTTCTAGCCAGATGCCAACAAAGTTGGTCAGCAATATTTTGTAATGAAAAGATTGTACCAGATCGTTGGTACTGGATAAATGACGGCACATGTTGGGACGGTGCAGTATCCGTGGAATTGAACAAACAAAGCTTTTTATTAACCAATAGCGCAGACCGAAATTGGAACCGAGACATAGTCACGTTCAGGACAGACATACGCCTAGGAATAGGGAAAAGTACACAAAAGCGCAAGCCAATTAAAAAGAAAATAATAATACCAGGTGAAAGCAAG	387	14726	KT149366.1 Bell pepper endornavirus, complete genome
TRINITY_DN731_c0_g1_i1	KP455654.1	99.483	387	2	0	1	387	11746	12132	0	690	KP455654.1	764	385	385	0	99.48	1	1	ACAGCAGAAAAAGCTTGGGTCGAATTGAACACTAATTATACTAGACAAGAATTTTTACACAAACTGCAAGGTACAAATTTAGTGCACACCGCAGACAGAATGGAACAACCAATATTTCTAGCCAGATGCCAACAAAGTTGGTCAGCAATATTTTGTAATGAAAAGATTGTACCAGATCGTTGGTACTGGATAAATGACGGCACATGTTGGGACGGTGCAGTATCCGTGGAATTGAACAAACAAAGCTTTTTATTAACCAATAGCGCAGACCGAAATTGGAACCGAGACATAGTTACGTTCAGGACAGACATACGCCTAGGAATAGGGAAAAGTACACAAAAGCGCAAGCCAATTAAAAAGAAAATAATAATACCAGGTGAAAGCAAG	ACAGCAGAAAAAGCTTGGGTCGAGTTGAACACTAATTATACTAGACAAGAATTTTTACACAAACTGCAAGGTACAAATTTAGTGCACACCGCAGACAGAATGGAACAACCAATATTTCTAGCCAGATGCCAACAAAGTTGGTCAGCAATATTTTGTAATGAAAAGATTGTACCAGATCGTTGGTACTGGATAAATGACGGCACATGTTGGGACGGTGCAGTATCCGTGGAATTGAACAAACAAAGCTTTTTATTAACCAATAGCGCAGACCGAAATTGGAACCGAGACATAGTCACGTTCAGGACAGACATACGCCTAGGAATAGGGAAAAGTACACAAAAGCGCAAGCCAATTAAAAAGAAAATAATAATACCAGGTGAAAGCAAG	387	14659	KP455654.1 Bell pepper endornavirus isolate Maor, complete genome
TRINITY_DN731_c0_g1_i1	KX525267.1	99.483	387	2	0	1	387	11810	12196	0	690	KX525267.1	764	385	385	0	99.48	1	1	ACAGCAGAAAAAGCTTGGGTCGAATTGAACACTAATTATACTAGACAAGAATTTTTACACAAACTGCAAGGTACAAATTTAGTGCACACCGCAGACAGAATGGAACAACCAATATTTCTAGCCAGATGCCAACAAAGTTGGTCAGCAATATTTTGTAATGAAAAGATTGTACCAGATCGTTGGTACTGGATAAATGACGGCACATGTTGGGACGGTGCAGTATCCGTGGAATTGAACAAACAAAGCTTTTTATTAACCAATAGCGCAGACCGAAATTGGAACCGAGACATAGTTACGTTCAGGACAGACATACGCCTAGGAATAGGGAAAAGTACACAAAAGCGCAAGCCAATTAAAAAGAAAATAATAATACCAGGTGAAAGCAAG	ACAGCAGAAAAAGCTTGGGTCGAGTTGAACACTAATTATACTAGACAAGAATTTTTACACAAACTGCAAGGTACAAATTTAGTGCACACCGCAGACAGAATGGAACAACCAATATTTCTAGCCAGATGCCAACAAAGTTGGTCAGCAATATTTTGTAATGAAAAGATTGTACCAGATCGTTGGTACTGGATAAATGACGGCACATGTTGGGACGGTGCAGTATCCGTGGAATTGAACAAACAAAGCTTTTTATTAACCAATAGCGCAGACCGAAATTGGAACCGAGACATAGTCACGTTCAGGACAGACATACGCCTAGGAATAGGGAAAAGTACACAAAAGCGCAAGCCAATTAAAAAGAAAATAATAATACCAGGTGAAAGCAAG	387	14790	KX525267.1 Bell pepper endornavirus isolate DR Polyprotein gene, complete cds
TRINITY_DN731_c0_g1_i1	AB597230.1	99.225	387	3	0	1	387	11806	12192	0	684	AB597230.1	758	384	384	0	99.22	1	1	ACAGCAGAAAAAGCTTGGGTCGAATTGAACACTAATTATACTAGACAAGAATTTTTACACAAACTGCAAGGTACAAATTTAGTGCACACCGCAGACAGAATGGAACAACCAATATTTCTAGCCAGATGCCAACAAAGTTGGTCAGCAATATTTTGTAATGAAAAGATTGTACCAGATCGTTGGTACTGGATAAATGACGGCACATGTTGGGACGGTGCAGTATCCGTGGAATTGAACAAACAAAGCTTTTTATTAACCAATAGCGCAGACCGAAATTGGAACCGAGACATAGTTACGTTCAGGACAGACATACGCCTAGGAATAGGGAAAAGTACACAAAAGCGCAAGCCAATTAAAAAGAAAATAATAATACCAGGTGAAAGCAAG	ACTGCAGAAAAAGCTTGGGTCGAGTTGAACACTAATTATACTAGACAAGAATTTTTACACAAACTGCAAGGTACAAATTTAGTGCACACCGCAGACAGAATGGAACAACCAATATTTCTAGCCAGATGCCAACAAAGTTGGTCAGCAATATTTTGTAATGAAAAGATTGTACCAGATCGTTGGTACTGGATAAATGACGGCACATGTTGGGACGGTGCAGTATCCGTGGAATTGAACAAACAAAGCTTTTTATTAACCAATAGCGCAGACCGAAATTGGAACCGAGACATAGTCACGTTCAGGACAGACATACGCCTAGGAATAGGGAAAAGTACACAAAAGCGCAAGCCAATTAAAAAGAAAATAATAATACCAGGTGAAAGCAAG	387	14727	AB597230.1 Bell pepper endornavirus genomic RNA, complete genome, host: Capsicum annuum cv. Kyosuzu
TRINITY_DN731_c0_g1_i1	KX977568.1	99.225	387	3	0	1	387	11816	12202	0	684	KX977568.1	758	384	384	0	99.22	1	1	ACAGCAGAAAAAGCTTGGGTCGAATTGAACACTAATTATACTAGACAAGAATTTTTACACAAACTGCAAGGTACAAATTTAGTGCACACCGCAGACAGAATGGAACAACCAATATTTCTAGCCAGATGCCAACAAAGTTGGTCAGCAATATTTTGTAATGAAAAGATTGTACCAGATCGTTGGTACTGGATAAATGACGGCACATGTTGGGACGGTGCAGTATCCGTGGAATTGAACAAACAAAGCTTTTTATTAACCAATAGCGCAGACCGAAATTGGAACCGAGACATAGTTACGTTCAGGACAGACATACGCCTAGGAATAGGGAAAAGTACACAAAAGCGCAAGCCAATTAAAAAGAAAATAATAATACCAGGTGAAAGCAAG	ACAGCAGAAAAAGCTTGGGTCGAGTTGAACACTAATTATACTAGACAAGAATTTTTACACAAACTGCAGGGTACAAATTTAGTGCACACCGCAGACAGAATGGAACAACCAATATTTCTAGCCAGATGCCAACAAAGTTGGTCAGCAATATTTTGTAATGAAAAGATTGTACCAGATCGTTGGTACTGGATAAATGACGGCACATGTTGGGACGGTGCAGTATCCGTGGAATTGAACAAACAAAGCTTTTTATTAACCAATAGCGCAGACCGAAATTGGAACCGAGACATAGTCACGTTCAGGACAGACATACGCCTAGGAATAGGGAAAAGTACACAAAAGCGCAAGCCAATTAAAAAGAAAATAATAATACCAGGTGAAAGCAAG	387	14727	KX977568.1 Bell pepper endornavirus isolate Santa Fe, complete genome
TRINITY_DN731_c0_g1_i1	KX977569.1	99.225	387	3	0	1	387	11807	12193	0	684	KX977569.1	758	384	384	0	99.22	1	1	ACAGCAGAAAAAGCTTGGGTCGAATTGAACACTAATTATACTAGACAAGAATTTTTACACAAACTGCAAGGTACAAATTTAGTGCACACCGCAGACAGAATGGAACAACCAATATTTCTAGCCAGATGCCAACAAAGTTGGTCAGCAATATTTTGTAATGAAAAGATTGTACCAGATCGTTGGTACTGGATAAATGACGGCACATGTTGGGACGGTGCAGTATCCGTGGAATTGAACAAACAAAGCTTTTTATTAACCAATAGCGCAGACCGAAATTGGAACCGAGACATAGTTACGTTCAGGACAGACATACGCCTAGGAATAGGGAAAAGTACACAAAAGCGCAAGCCAATTAAAAAGAAAATAATAATACCAGGTGAAAGCAAG	ACAGCAGAAAAAGCTTGGGTCGAGTTGAACACTAATTATACTAGACAAGAATTTTTACACAAACTGCAGGGTACAAATTTAGTGCACACCGCAGACAGAATGGAACAACCAATATTTCTAGCCAGATGCCAACAAAGTTGGTCAGCAATATTTTGTAATGAAAAGATTGTACCAGATCGTTGGTACTGGATAAATGACGGCACATGTTGGGACGGTGCAGTATCCGTGGAATTGAACAAACAAAGCTTTTTATTAACCAATAGCGCAGACCGAAATTGGAACCGAGACATAGTCACGTTCAGGACAGACATACGCCTAGGAATAGGGAAAAGTACACAAAAGCGCAAGCCAATTAAAAAGAAAATAATAATACCAGGTGAAAGCAAG	387	14714	KX977569.1 Bell pepper endornavirus isolate Penol, complete genome
TRINITY_DN731_c0_g1_i1	NC_015781.2	86.047	387	54	0	1	387	11807	12193	1.73e-127	455	NC_015781.2	504	333	333	0	86.05	1	1	ACAGCAGAAAAAGCTTGGGTCGAATTGAACACTAATTATACTAGACAAGAATTTTTACACAAACTGCAAGGTACAAATTTAGTGCACACCGCAGACAGAATGGAACAACCAATATTTCTAGCCAGATGCCAACAAAGTTGGTCAGCAATATTTTGTAATGAAAAGATTGTACCAGATCGTTGGTACTGGATAAATGACGGCACATGTTGGGACGGTGCAGTATCCGTGGAATTGAACAAACAAAGCTTTTTATTAACCAATAGCGCAGACCGAAATTGGAACCGAGACATAGTTACGTTCAGGACAGACATACGCCTAGGAATAGGGAAAAGTACACAAAAGCGCAAGCCAATTAAAAAGAAAATAATAATACCAGGTGAAAGCAAG	ACAGCGGAAAAAGCATGGGTCGAGTTAAACACCAATTACACCAGAGAAGAATTTTTACACAAACTAAAAGGTACAAATTTGGTGCACACCGCAGATAGGATGGAACAACCAGTATTTTTGAATAGATGTCAGCAAAGTAGCTCAGCAATTTTTTGTAGTGATAAGATAGTGCCAGATCGTTGGTACTGGATAAATGACAGCACATGTTGGGAAGGTGCAGTGTCTGTCGAATTAAACAAACAAAGCTTTTTGTTAACCAATAGCGCAGACCGAAATTGGGGCCAAGATATATTAACATTTAGGACAGACATACGCTTGGGACTAGGGAAAAGTGGCCAAAAGCGCATGCCAATTAAAAAGAAGATAATAATACCAGGCGATTGCAAG	387	14728	NC_015781.2 Bell pepper endornavirus, complete genome
TRINITY_DN731_c0_g1_i1	NC_027920.1	66.839	386	124	2	3	386	11809	12192	6.92e-25	114	NC_027920.1	126	258	258	4	66.84	1	1	AGCAGAAAAAGCTTGGGTCGAATTGAACACTAATTATACTAGACAAGAATTTTTACACAAACTGCAAGGTACAAATTTAGTGCACACCGCAGACAGAATGGAACAACCAATATTTCTAGCCAGATGCCAACAAAGTTGGTCAGCAATATTTTGTAATGAAAAGATTGTACCAGATCGTTGGTACTGGATAAATGACGGCACATGTTGGGACGGTGCAGTATCCGTGGAATTGAACAA--ACAAAGCTTTTTATTAACCAATAGCGCAGACCGAAATTGGAACCGAGACATAGTTACGTTCAGGACAGACATACGCCTAGGAATAGGGAAAAGTACACAAAAGCGCAAGCCAATTAAAAAGAAAATAATAATACCAGGTGAAAGCAA	AGCTGGACAAGTGTGGGCTGAGCTGGATACTACTTATACCAGAGAGGAGTTTTTATACAAGTTACAAGGGACAAACCTGGTGCACACTGCAGATCGAATGGACCAGCCATTGACAATTACAAAATGTAGGCAAAGCTGGTCAGCTGTGTTTTGTGAAGAGCAAATAGTGCCCGACCGCTGGTATTGGGTTAACGATGGTGGAACATGGCAAGGAGCAATAGCAGTGCAATTAAAGAGGCACAAAG--TATTGCTAGTCAATAGTGCGGAACAAAGTTGGGGCAATAAAATAGTCATTCTTAGAACTGACATCCGGTTAGGTGTGATGAAACCAATGCAAAAGAAAAAGCCAATTCACAAGAAAATAATAGTACCTGGTGACTGCAA	387	14729	NC_027920.1 Hot pepper endornavirus isolate CS, complete genome
TRINITY_DN731_c1_g1_i1	KT149366.1	99.691	324	1	0	1	324	11530	11853	4.97e-165	580	KT149366.1	642	323	323	0	99.69	1	1	GGATTGATGTTACCAGACAGCAACATCCGCTTCGAGCATAAAAGCCCAACCGGAGACACAGGGCCTGTAATAGTTGTAGTAAGTGGAACCAGTTTGGGGCACTGCATTTTAAAGGAAGTAAGCATACTAGGGTCAAAACTGATCAAGCAAGAAAACTGTGTGCAAATGGGAATCAATCGAACCACTGAGACGCAACTAAACGAACTATTCGAAAGATGTGGCGGATGTGGTGATTGGACCAAACAAAACTTGCCCTCACTGATTTTAAATGAGGAAACAGCAGAAAAAGCTTGGGTCGAGTTGAACACTAATTATACTAGACAA	GGATTGAAGTTACCAGACAGCAACATCCGCTTCGAGCATAAAAGCCCAACCGGAGACACAGGGCCTGTAATAGTTGTAGTAAGTGGAACCAGTTTGGGGCACTGCATTTTAAAGGAAGTAAGCATACTAGGGTCAAAACTGATCAAGCAAGAAAACTGTGTGCAAATGGGAATCAATCGAACCACTGAGACGCAACTAAACGAACTATTCGAAAGATGTGGCGGATGTGGTGATTGGACCAAACAAAACTTGCCCTCACTGATTTTAAATGAGGAAACAGCAGAAAAAGCTTGGGTCGAGTTGAACACTAATTATACTAGACAA	324	14726	KT149366.1 Bell pepper endornavirus, complete genome
TRINITY_DN731_c1_g1_i1	KP455654.1	99.691	324	1	0	1	324	11470	11793	4.97e-165	580	KP455654.1	642	323	323	0	99.69	1	1	GGATTGATGTTACCAGACAGCAACATCCGCTTCGAGCATAAAAGCCCAACCGGAGACACAGGGCCTGTAATAGTTGTAGTAAGTGGAACCAGTTTGGGGCACTGCATTTTAAAGGAAGTAAGCATACTAGGGTCAAAACTGATCAAGCAAGAAAACTGTGTGCAAATGGGAATCAATCGAACCACTGAGACGCAACTAAACGAACTATTCGAAAGATGTGGCGGATGTGGTGATTGGACCAAACAAAACTTGCCCTCACTGATTTTAAATGAGGAAACAGCAGAAAAAGCTTGGGTCGAGTTGAACACTAATTATACTAGACAA	GGATTGAAGTTACCAGACAGCAACATCCGCTTCGAGCATAAAAGCCCAACCGGAGACACAGGGCCTGTAATAGTTGTAGTAAGTGGAACCAGTTTGGGGCACTGCATTTTAAAGGAAGTAAGCATACTAGGGTCAAAACTGATCAAGCAAGAAAACTGTGTGCAAATGGGAATCAATCGAACCACTGAGACGCAACTAAACGAACTATTCGAAAGATGTGGCGGATGTGGTGATTGGACCAAACAAAACTTGCCCTCACTGATTTTAAATGAGGAAACAGCAGAAAAAGCTTGGGTCGAGTTGAACACTAATTATACTAGACAA	324	14659	KP455654.1 Bell pepper endornavirus isolate Maor, complete genome
TRINITY_DN731_c1_g1_i1	JQ951943.1	99.383	324	2	0	1	324	11530	11853	6.06e-164	576	JQ951943.1	638	322	322	0	99.38	1	1	GGATTGATGTTACCAGACAGCAACATCCGCTTCGAGCATAAAAGCCCAACCGGAGACACAGGGCCTGTAATAGTTGTAGTAAGTGGAACCAGTTTGGGGCACTGCATTTTAAAGGAAGTAAGCATACTAGGGTCAAAACTGATCAAGCAAGAAAACTGTGTGCAAATGGGAATCAATCGAACCACTGAGACGCAACTAAACGAACTATTCGAAAGATGTGGCGGATGTGGTGATTGGACCAAACAAAACTTGCCCTCACTGATTTTAAATGAGGAAACAGCAGAAAAAGCTTGGGTCGAGTTGAACACTAATTATACTAGACAA	GGATTGAAGTTACCAGACAGCAACATCCGCTTCGAGCATAAAAGCCCAACCGGAGACACAGGGCCTGTAATAGTTGTAGTAAGTGGAACCAGTTTGGGGCACTGCATTTTAAAGGAAGTAAGCATACTAGGGTCAAAACTGATCAAGCAAGAAAACTGTGTGCAAATGGGGATCAATCGAACCACTGAGACGCAACTAAACGAACTATTCGAAAGATGTGGCGGATGTGGTGATTGGACCAAACAAAACTTGCCCTCACTGATTTTAAATGAGGAAACAGCAGAAAAAGCTTGGGTCGAGTTGAACACTAATTATACTAGACAA	324	14727	JQ951943.1 Bell pepper endornavirus strain IS RNA-dependent RNA polymerase (RdRp) gene, complete cds
TRINITY_DN731_c1_g1_i1	KX525267.1	99.383	324	2	0	1	324	11534	11857	6.06e-164	576	KX525267.1	638	322	322	0	99.38	1	1	GGATTGATGTTACCAGACAGCAACATCCGCTTCGAGCATAAAAGCCCAACCGGAGACACAGGGCCTGTAATAGTTGTAGTAAGTGGAACCAGTTTGGGGCACTGCATTTTAAAGGAAGTAAGCATACTAGGGTCAAAACTGATCAAGCAAGAAAACTGTGTGCAAATGGGAATCAATCGAACCACTGAGACGCAACTAAACGAACTATTCGAAAGATGTGGCGGATGTGGTGATTGGACCAAACAAAACTTGCCCTCACTGATTTTAAATGAGGAAACAGCAGAAAAAGCTTGGGTCGAGTTGAACACTAATTATACTAGACAA	GGATTGAAGTTACCAGACAGCAACATCCGCTTCGAGCATAAAAGCCCAACCGGAGACACAGGGCCTGTAATAGTTGTAGTAAGTGGAACCAGTTTGGGGCACTGCATTTTAAAAGAAGTAAGCATACTAGGGTCAAAACTGATCAAGCAAGAAAACTGTGTGCAAATGGGAATCAATCGAACCACTGAGACGCAACTAAACGAACTATTCGAAAGATGTGGCGGATGTGGTGATTGGACCAAACAAAACTTGCCCTCACTGATTTTAAATGAGGAAACAGCAGAAAAAGCTTGGGTCGAGTTGAACACTAATTATACTAGACAA	324	14790	KX525267.1 Bell pepper endornavirus isolate DR Polyprotein gene, complete cds
TRINITY_DN731_c1_g1_i1	KX977568.1	99.074	324	3	0	1	324	11540	11863	2.57e-162	571	KX977568.1	632	321	321	0	99.07	1	1	GGATTGATGTTACCAGACAGCAACATCCGCTTCGAGCATAAAAGCCCAACCGGAGACACAGGGCCTGTAATAGTTGTAGTAAGTGGAACCAGTTTGGGGCACTGCATTTTAAAGGAAGTAAGCATACTAGGGTCAAAACTGATCAAGCAAGAAAACTGTGTGCAAATGGGAATCAATCGAACCACTGAGACGCAACTAAACGAACTATTCGAAAGATGTGGCGGATGTGGTGATTGGACCAAACAAAACTTGCCCTCACTGATTTTAAATGAGGAAACAGCAGAAAAAGCTTGGGTCGAGTTGAACACTAATTATACTAGACAA	GGATTGAAGTTACCAGATAGCAACATCCGCTTCGAGCATAAAAGCCCAACCGGAGACACAGGGCCTGTAATAGTTGTAGTAAGTGGAACCAGTTTGGGGCACTGCATTTTAAAGGAAGTAAGCATACTAGGGTCAAAACTGATCAAGCAAGAAAACTGTGTGCAAATGGGGATCAATCGAACCACTGAGACGCAACTAAACGAACTATTCGAAAGATGTGGCGGATGTGGTGATTGGACCAAACAAAACTTGCCCTCACTGATTTTAAATGAGGAAACAGCAGAAAAAGCTTGGGTCGAGTTGAACACTAATTATACTAGACAA	324	14727	KX977568.1 Bell pepper endornavirus isolate Santa Fe, complete genome
TRINITY_DN731_c1_g1_i1	AB597230.1	98.765	324	4	0	1	324	11530	11853	3.14e-161	567	AB597230.1	628	320	320	0	98.77	1	1	GGATTGATGTTACCAGACAGCAACATCCGCTTCGAGCATAAAAGCCCAACCGGAGACACAGGGCCTGTAATAGTTGTAGTAAGTGGAACCAGTTTGGGGCACTGCATTTTAAAGGAAGTAAGCATACTAGGGTCAAAACTGATCAAGCAAGAAAACTGTGTGCAAATGGGAATCAATCGAACCACTGAGACGCAACTAAACGAACTATTCGAAAGATGTGGCGGATGTGGTGATTGGACCAAACAAAACTTGCCCTCACTGATTTTAAATGAGGAAACAGCAGAAAAAGCTTGGGTCGAGTTGAACACTAATTATACTAGACAA	GGATTGAAGTTACCAGACAGCAACATCCGCTTCGAGCATAAAAGCCCAACCGGAGACACAGGGCCTGTAATAGTTGTAGTAAGTGGAACCAGTTTGGGGCACTGCATTTTAAAGGAAGTAAGCATACTAGGGTCAAAACTAATCAAGCAAGAAAACTGTGTGCAAATGGGGATCAATCGAACCACTGAGACGCAACTAAACGAACTATTCGAAAGATGTGGCGGATGTGGTGATTGGACCAAACAAAACTTGCCCTCACTGATTTTAAATGAGGAAACTGCAGAAAAAGCTTGGGTCGAGTTGAACACTAATTATACTAGACAA	324	14727	AB597230.1 Bell pepper endornavirus genomic RNA, complete genome, host: Capsicum annuum cv. Kyosuzu
TRINITY_DN731_c1_g1_i1	KX977569.1	98.765	324	4	0	1	324	11531	11854	3.14e-161	567	KX977569.1	628	320	320	0	98.77	1	1	GGATTGATGTTACCAGACAGCAACATCCGCTTCGAGCATAAAAGCCCAACCGGAGACACAGGGCCTGTAATAGTTGTAGTAAGTGGAACCAGTTTGGGGCACTGCATTTTAAAGGAAGTAAGCATACTAGGGTCAAAACTGATCAAGCAAGAAAACTGTGTGCAAATGGGAATCAATCGAACCACTGAGACGCAACTAAACGAACTATTCGAAAGATGTGGCGGATGTGGTGATTGGACCAAACAAAACTTGCCCTCACTGATTTTAAATGAGGAAACAGCAGAAAAAGCTTGGGTCGAGTTGAACACTAATTATACTAGACAA	GGATTGAAGTTACCAGATAGCAACATCCGCTTCGAGCATAAAAGCCCAACCGGAGACACAGGGCCTGTAATAGTTGTAGTAAGTGGAACCAGTTTGGGGCACTGCATTTTAAAGGAAGTAAGCATACTAGGGTCAAAACTGATCAAGCAAGAAAACTGTGTGCAAATGGGGATCAATCGAACCACTGAGACGCAACTAAACGAACTATTCGAAAGATGTGGCGGATGTGGTGATTGGACCAGACAAAACTTGCCCTCACTGATTTTAAATGAGGAAACAGCAGAAAAAGCTTGGGTCGAGTTGAACACTAATTATACTAGACAA	324	14714	KX977569.1 Bell pepper endornavirus isolate Penol, complete genome
TRINITY_DN731_c1_g1_i1	NC_015781.2	81.587	315	58	0	10	324	11540	11854	4.67e-83	307	NC_015781.2	340	257	257	0	81.59	1	1	TTACCAGACAGCAACATCCGCTTCGAGCATAAAAGCCCAACCGGAGACACAGGGCCTGTAATAGTTGTAGTAAGTGGAACCAGTTTGGGGCACTGCATTTTAAAGGAAGTAAGCATACTAGGGTCAAAACTGATCAAGCAAGAAAACTGTGTGCAAATGGGAATCAATCGAACCACTGAGACGCAACTAAACGAACTATTCGAAAGATGTGGCGGATGTGGTGATTGGACCAAACAAAACTTGCCCTCACTGATTTTAAATGAGGAAACAGCAGAAAAAGCTTGGGTCGAGTTGAACACTAATTATACTAGACAA	TTACCAGATGGCAATATCCGATTCGAGCACAAAAGTCCAACCGAAGACACGGGTTCTGTAATAGTTGTTGTGAGTGGAACAAGTTTAGGGCACTGCATGTTGAAAGAAGTGGCCATATTGGGGTCAAAACTAATAAAACGAGAGAATTGTGCGCAAATGATGATAAATCGAGCCACTGAATTACAACTAAATGAACTATTTAAAAGATGTGGCGGATGTGGCGATTGGACTAGACAAAACTTGCCATCACTAATCTTGGATGAAGGAACAGCGGAAAAAGCATGGGTCGAGTTAAACACCAATTACACCAGAGAA	324	14728	NC_015781.2 Bell pepper endornavirus, complete genome
TRINITY_DN731_c1_g1_i1	NC_027920.1	68.489	311	98	0	11	321	11541	11851	1.34e-26	120	NC_027920.1	132	213	213	0	68.49	1	1	TACCAGACAGCAACATCCGCTTCGAGCATAAAAGCCCAACCGGAGACACAGGGCCTGTAATAGTTGTAGTAAGTGGAACCAGTTTGGGGCACTGCATTTTAAAGGAAGTAAGCATACTAGGGTCAAAACTGATCAAGCAAGAAAACTGTGTGCAAATGGGAATCAATCGAACCACTGAGACGCAACTAAACGAACTATTCGAAAGATGTGGCGGATGTGGTGATTGGACCAAACAAAACTTGCCCTCACTGATTTTAAATGAGGAAACAGCAGAAAAAGCTTGGGTCGAGTTGAACACTAATTATACTAGA	TACCAGATGGCAAATTACGGTTCGAACACAAAGGTCCCACAGGAGAAACCGGATTTGCTGTATTTATCACTAGTGGTGTCAGCTTAGGGCACTGCATATTAAAACAAGTGAACATATTGGGTTCTAAACCATTGAATTTGCAAAAATGTGTGCAAATGGAGTTGAGCCGAGAAACACAAACCGAATTGAATGAATTGTTTAAAAGATATGGAGGTTGTGGTGATTGGACTCAGCAGAACTTGCCATCATTGATATTAAGTGAAGATTTAGCTGGACAAGTGTGGGCTGAGCTGGATACTACTTATACCAGA	324	14729	NC_027920.1 Hot pepper endornavirus isolate CS, complete genome
TRINITY_DN731_c2_g1_i1	KP455654.1	98.456	259	4	0	1	259	11515	11257	4.74e-126	450	KP455654.1	498	255	255	0	98.46	1	-1	GGCTGTTATGCTCGATGCGGATGTTGCTGTCTGGTAACTTCAATCCCAATTTTAAATCCAGCATGCGAATTATTACCTTGAGGTCATTCACTCTTGGTACAGATGCCACCCTTAACCACTGGTAACACTTTTGCACGATGTTTGTGGCTCGCAACCCATCTATGTCATATTGTGTTTGTATTGCCATGGTCAAAACTTCCTTTGCACAATCGAATTGGCTTTTTGGTGCTATCAACAATCTGGTTCTGCCAGGAGTTAC	GGCTTTTATGCTCGAAGCGGATGTTGCTGTCTGGTAACTTCAATCCCAATTTTAAATCCAGCATGCGAATTATTACCTTGAGGTCATTCACTCTTGGTACAGATGCCACCCTTAACCACTGGTAACACTTTTGCACGATGTTTGTGGCTCGCAACTCATCTATGTCATATTGTGTTTGTATTGCCATGGTCAAAACTTCCTTTGCACAATCGAATTGGCTTTTTGGTGCTAGCAACAATCTGGTTCTGCCAGGAGTTAC	259	14659	KP455654.1 Bell pepper endornavirus isolate Maor, complete genome
TRINITY_DN731_c2_g1_i1	KX525267.1	98.456	259	4	0	1	259	11579	11321	4.74e-126	450	KX525267.1	498	255	255	0	98.46	1	-1	GGCTGTTATGCTCGATGCGGATGTTGCTGTCTGGTAACTTCAATCCCAATTTTAAATCCAGCATGCGAATTATTACCTTGAGGTCATTCACTCTTGGTACAGATGCCACCCTTAACCACTGGTAACACTTTTGCACGATGTTTGTGGCTCGCAACCCATCTATGTCATATTGTGTTTGTATTGCCATGGTCAAAACTTCCTTTGCACAATCGAATTGGCTTTTTGGTGCTATCAACAATCTGGTTCTGCCAGGAGTTAC	GGCTTTTATGCTCGAAGCGGATGTTGCTGTCTGGTAACTTCAATCCCAATTTTAAATCCAGCATGCGAATTATTACCTTGAGGTCATTCACTCTTGGTACAGATGCCACCCTTAACCACTGGTAACACTTTTGCACGATGTTTGTGGCTCGCAACTCATCTATGTCATATTGTGTTTGTATTGCCATGGTCAAAACTTCCTTTGCACAATCGAATTGGCTTTTTGGTGCTAGCAACAATCTGGTTCTGCCAGGAGTTAC	259	14790	KX525267.1 Bell pepper endornavirus isolate DR Polyprotein gene, complete cds
TRINITY_DN731_c2_g1_i1	AB597230.1	98.069	259	5	0	1	259	11575	11317	2.01e-124	444	AB597230.1	492	254	254	0	98.07	1	-1	GGCTGTTATGCTCGATGCGGATGTTGCTGTCTGGTAACTTCAATCCCAATTTTAAATCCAGCATGCGAATTATTACCTTGAGGTCATTCACTCTTGGTACAGATGCCACCCTTAACCACTGGTAACACTTTTGCACGATGTTTGTGGCTCGCAACCCATCTATGTCATATTGTGTTTGTATTGCCATGGTCAAAACTTCCTTTGCACAATCGAATTGGCTTTTTGGTGCTATCAACAATCTGGTTCTGCCAGGAGTTAC	GGCTTTTATGCTCGAAGCGGATGTTGCTGTCTGGTAACTTCAATCCCAATTTTAAATCCAGCATGCGAATTATTACCTTGAGGTCGTTCACTCTTGGTACAGATGCCACCCTTAACCACTGGTAACACTTTTGCACGATGTTTGTGGCTCGCAACTCATCTATGTCATATTGTGTTTGTATTGCCATGGTCAAAACTTCCTTTGCACAATCGAATTGGCTTTTTGGTGCTAGCAACAATCTGGTTCTGCCAGGAGTTAC	259	14727	AB597230.1 Bell pepper endornavirus genomic RNA, complete genome, host: Capsicum annuum cv. Kyosuzu
TRINITY_DN731_c2_g1_i1	KT149366.1	98.069	259	5	0	1	259	11575	11317	2.01e-124	444	KT149366.1	492	254	254	0	98.07	1	-1	GGCTGTTATGCTCGATGCGGATGTTGCTGTCTGGTAACTTCAATCCCAATTTTAAATCCAGCATGCGAATTATTACCTTGAGGTCATTCACTCTTGGTACAGATGCCACCCTTAACCACTGGTAACACTTTTGCACGATGTTTGTGGCTCGCAACCCATCTATGTCATATTGTGTTTGTATTGCCATGGTCAAAACTTCCTTTGCACAATCGAATTGGCTTTTTGGTGCTATCAACAATCTGGTTCTGCCAGGAGTTAC	GGCTTTTATGCTCGAAGCGGATGTTGCTGTCTGGTAACTTCAATCCCAATTTTAAATCCAGCATGCGAATTATTACCTTGAGGTCATTCACTCTTGGTACAGATGCCACCCTTAACCACTGGTAACACTTTTGCACGATGTTTGTGGCTCGCAACTCATCTATGTCATATTGTGTTTGTATTGCCATGGTCAAAACTTCCTTTGCACAATCGAATTGGCTTTTTGGTGCTAGCAACAATCTGGTTCTGCCAGGAATTAC	259	14726	KT149366.1 Bell pepper endornavirus, complete genome
TRINITY_DN731_c2_g1_i1	JQ951943.1	97.683	259	6	0	1	259	11575	11317	2.45e-123	441	JQ951943.1	488	253	253	0	97.68	1	-1	GGCTGTTATGCTCGATGCGGATGTTGCTGTCTGGTAACTTCAATCCCAATTTTAAATCCAGCATGCGAATTATTACCTTGAGGTCATTCACTCTTGGTACAGATGCCACCCTTAACCACTGGTAACACTTTTGCACGATGTTTGTGGCTCGCAACCCATCTATGTCATATTGTGTTTGTATTGCCATGGTCAAAACTTCCTTTGCACAATCGAATTGGCTTTTTGGTGCTATCAACAATCTGGTTCTGCCAGGAGTTAC	GGCTTTTATGCTCGAAGCGGATGTTGCTGTCTGGTAACTTCAATCCCAATTTTAAATCCAGCATGCGAATTATTACCTTGAGGTCGTTCACTCTTGGTACAGATGCCACCCTTAACCACTGGTAACACTTTTGCACGATGTTTGTGGCTCGTAACTCATCTATGTCATATTGTGTTTGTATTGCCATGGTCAAAACTTCCTTTGCACAATCGAATTGGCTTTTTGGTGCTAGCAACAATCTGGTTCTGCCAGGAGTTAC	259	14727	JQ951943.1 Bell pepper endornavirus strain IS RNA-dependent RNA polymerase (RdRp) gene, complete cds
TRINITY_DN731_c2_g1_i1	KX977569.1	97.297	259	7	0	1	259	11576	11318	1.04e-121	435	KX977569.1	482	252	252	0	97.3	1	-1	GGCTGTTATGCTCGATGCGGATGTTGCTGTCTGGTAACTTCAATCCCAATTTTAAATCCAGCATGCGAATTATTACCTTGAGGTCATTCACTCTTGGTACAGATGCCACCCTTAACCACTGGTAACACTTTTGCACGATGTTTGTGGCTCGCAACCCATCTATGTCATATTGTGTTTGTATTGCCATGGTCAAAACTTCCTTTGCACAATCGAATTGGCTTTTTGGTGCTATCAACAATCTGGTTCTGCCAGGAGTTAC	GGCTTTTATGCTCGAAGCGGATGTTGCTATCTGGTAACTTCAATCCCAATTTTAAATCCAGCATGCGAATTATTACCTTGAGGTCGTTCACTCTTGGTACAGATGCCACCCTTAACCACTGGTAACACTTTTGCACTATGTTTGTGGCTCGCAACTCATCTATGTCATATTGTGTTTGTATTGCCATGGTCAAAACTTCCTTTGCACAATCGAATTGGCTTTTTGGTGCTAGCAACAATCTGGTTCTGCCAGGAGTTAC	259	14714	KX977569.1 Bell pepper endornavirus isolate Penol, complete genome
TRINITY_DN731_c2_g1_i1	KX977568.1	96.183	262	7	1	1	259	11585	11324	5.41e-119	426	KX977568.1	472	252	252	3	96.18	1	-1	GGCTGTTATGCTCGATGCGGATGTTGCTGTCTGGTAACTTCAATCCCAATTTTAAATCCAGCATGCGAATTATTACCTTGAGGTCATTCACTCTTGGTACAGATGCCACCCTTAACCAC---TGGTAACACTTTTGCACGATGTTTGTGGCTCGCAACCCATCTATGTCATATTGTGTTTGTATTGCCATGGTCAAAACTTCCTTTGCACAATCGAATTGGCTTTTTGGTGCTATCAACAATCTGGTTCTGCCAGGAGTTAC	GGCTTTTATGCTCGAAGCGGATGTTGCTATCTGGTAACTTCAATCCCAATTTTAAATCCAGCATGCGAATTATTACCTTGAGGTCGTTCACTCTTGGTACAGATGCCACCCTTAACCACAGCTGGTAACACTTTTGCACTATGTTTGTGGCTCGCAACTCATCTATGTCATATTGTGTTTGTATTGCCATGGTCAAAACTTCCTTTGCACAATCGAATTGGCTTTTTGGTGCTAGCAACAATCTGGTTCTGCCAGGAGTTAC	259	14727	KX977568.1 Bell pepper endornavirus isolate Santa Fe, complete genome
TRINITY_DN731_c2_g1_i1	NC_015781.2	86.381	257	35	0	3	259	11574	11318	1.27e-82	306	NC_015781.2	338	222	222	0	86.38	1	-1	CTGTTATGCTCGATGCGGATGTTGCTGTCTGGTAACTTCAATCCCAATTTTAAATCCAGCATGCGAATTATTACCTTGAGGTCATTCACTCTTGGTACAGATGCCACCCTTAACCACTGGTAACACTTTTGCACGATGTTTGTGGCTCGCAACCCATCTATGTCATATTGTGTTTGTATTGCCATGGTCAAAACTTCCTTTGCACAATCGAATTGGCTTTTTGGTGCTATCAACAATCTGGTTCTGCCAGGAGTTAC	CTTTTGTGCTCGAATCGGATATTGCCATCTGGTAATTTTATCCCCAATTTTAAATCTAGCATGCGAATTATTGTCTTAAGGTCGTTCACTCTTGGCACAGTCGTTACTCTTAACCACTGGTAACATTTTTGCACAATGTTTGTGGCTCGTAATTCATCTATGTTATACTGTGTTTGTATTGCCATGGTCAAAACTTCCTTTGCACAATCGAATTGGCTTTTTGGCGCTAGCAACAGTCTAGTTCTGCCGGGAGTCAC	259	14728	NC_015781.2 Bell pepper endornavirus, complete genome
TRINITY_DN749_c0_g1_i1	KT149366.1	99.788	472	1	0	1	472	737	1208	0	847	KT149366.1	938	471	471	0	99.79	1	1	TGACTAAGTCAAGATGTGGAGTCTGTTTGCAACCGCTATTGGTTAGAACAATGATGCCTGAATGCATTATGTGGGGCATGTTGGAGGTGATTGATATTACACAATTGCGAGTGGGAGCAATAGAGTTGAACAACGCAGAGATAACCTTGCAGCTGGATGGTCAGCCACCATTAGCACCAGCCACATTGTCAAAACTAATTGACCAAGATCTAAGGAATTTGCGGTCAGTCATGTCACGCGCTATGAGTAAAACTATATATGTACCTAATGGGTTAACTGAATATCAGAAAAAAGAATTGGCAATTGTTGTGCCGGCATACAAGTTATTGCCAATGTCCGGAACACCCAACCCACACGCAATGTTGGCAGCTGAAAGAAGAATTTGTGCGGTTACGATGG…	TGACTAAGTCAAGATGTGGAGTCTGTTTGCAACCGCTATTGGTTAGAACAATGATGCCTGAATGCATTATGTGGGGCATGTTGGAGGTGATTGATATTACACAATTGCGAGTGGGAGCAATAGAGTTGAACAACGCAGAGATAACCTTGCAGCTGGATGGTCAGCCACCATTAGCACCAGCCACATTGTCAAAACTAATTGACCAAGATCTAAGGAATTTGCGGTCAGTCATGTCACGCGCTATGAGTAAAACTATATATGTACCTAATGGGTTAACTGAATATCAGAAAAAAGAATTGGCAATTGTTGTGCCGGCATACAAGCTATTGCCAATGTCCGGAACACCCAACCCACACGCAATGTTGGCAGCTGAAAGAAGAATTTGTGCGGTTACGATGG…	472	14726	KT149366.1 Bell pepper endornavirus, complete genome
TRINITY_DN749_c0_g1_i1	KP455654.1	99.788	472	1	0	1	472	677	1148	0	847	KP455654.1	938	471	471	0	99.79	1	1	TGACTAAGTCAAGATGTGGAGTCTGTTTGCAACCGCTATTGGTTAGAACAATGATGCCTGAATGCATTATGTGGGGCATGTTGGAGGTGATTGATATTACACAATTGCGAGTGGGAGCAATAGAGTTGAACAACGCAGAGATAACCTTGCAGCTGGATGGTCAGCCACCATTAGCACCAGCCACATTGTCAAAACTAATTGACCAAGATCTAAGGAATTTGCGGTCAGTCATGTCACGCGCTATGAGTAAAACTATATATGTACCTAATGGGTTAACTGAATATCAGAAAAAAGAATTGGCAATTGTTGTGCCGGCATACAAGTTATTGCCAATGTCCGGAACACCCAACCCACACGCAATGTTGGCAGCTGAAAGAAGAATTTGTGCGGTTACGATGG…	TGACTAAGTCAAGATGTGGAGTCTGTTTGCAACCGCTATTGGTTAGAACAATGATGCCTGAATGCATTATGTGGGGCATGTTGGAGGTGATTGATATTACACAATTGCGAGTGGGAGCAATAGAGTTGAACAACGCAGAGATAACCTTGCAGCTGGATGGTCAGCCACCATTAGCACCAGCCACATTGTCAAAACTAATTGACCAAGATCTAAGGAATTTGCGGTCAGTCATGTCACGCGCTATGAGTAAAACTATATATGTACCTAATGGGTTAACTGAATATCAGAAAAAAGAATTGGCAATTGTTGTGCCGGCATACAAGCTATTGCCAATGTCCGGAACACCCAACCCACACGCAATGTTGGCAGCTGAAAGAAGAATTTGTGCGGTTACGATGG…	472	14659	KP455654.1 Bell pepper endornavirus isolate Maor, complete genome
TRINITY_DN749_c0_g1_i1	KX525267.1	99.788	472	1	0	1	472	741	1212	0	847	KX525267.1	938	471	471	0	99.79	1	1	TGACTAAGTCAAGATGTGGAGTCTGTTTGCAACCGCTATTGGTTAGAACAATGATGCCTGAATGCATTATGTGGGGCATGTTGGAGGTGATTGATATTACACAATTGCGAGTGGGAGCAATAGAGTTGAACAACGCAGAGATAACCTTGCAGCTGGATGGTCAGCCACCATTAGCACCAGCCACATTGTCAAAACTAATTGACCAAGATCTAAGGAATTTGCGGTCAGTCATGTCACGCGCTATGAGTAAAACTATATATGTACCTAATGGGTTAACTGAATATCAGAAAAAAGAATTGGCAATTGTTGTGCCGGCATACAAGTTATTGCCAATGTCCGGAACACCCAACCCACACGCAATGTTGGCAGCTGAAAGAAGAATTTGTGCGGTTACGATGG…	TGACTAAGTCAAGATGTGGAGTCTGTTTGCAACCGCTATTGGTTAGAACAATGATGCCTGAATGCATTATGTGGGGCATGTTGGAGGTGATTGATATTACACAATTGCGAGTGGGAGCAATAGAGTTGAACAACGCAGAGATAACCTTGCAGCTGGATGGTCAGCCACCATTAGCACCAGCCACATTGTCAAAACTAATTGACCAAGATCTAAGGAATTTGCGGTCAGTCATGTCACGCGCTATGAGTAAAACTATATATGTACCTAATGGGTTAACTGAATATCAGAAAAAAGAATTGGCAATTGTTGTGCCGGCATACAAGCTATTGCCAATGTCCGGAACACCCAACCCACACGCAATGTTGGCAGCTGAAAGAAGAATTTGTGCGGTTACGATGG…	472	14790	KX525267.1 Bell pepper endornavirus isolate DR Polyprotein gene, complete cds
TRINITY_DN749_c0_g1_i1	KX977568.1	99.364	472	3	0	1	472	744	1215	0	838	KX977568.1	928	469	469	0	99.36	1	1	TGACTAAGTCAAGATGTGGAGTCTGTTTGCAACCGCTATTGGTTAGAACAATGATGCCTGAATGCATTATGTGGGGCATGTTGGAGGTGATTGATATTACACAATTGCGAGTGGGAGCAATAGAGTTGAACAACGCAGAGATAACCTTGCAGCTGGATGGTCAGCCACCATTAGCACCAGCCACATTGTCAAAACTAATTGACCAAGATCTAAGGAATTTGCGGTCAGTCATGTCACGCGCTATGAGTAAAACTATATATGTACCTAATGGGTTAACTGAATATCAGAAAAAAGAATTGGCAATTGTTGTGCCGGCATACAAGTTATTGCCAATGTCCGGAACACCCAACCCACACGCAATGTTGGCAGCTGAAAGAAGAATTTGTGCGGTTACGATGG…	TGACTAAGTCAAGATGTGGAGTCTGTTTGCAACCGCTATTGGTTAGAACAATGATGCCTGAATGCATTATGTGGGGCATGTTGGAGGTGATTGATATTACACAATTGCGAGTGGGAGCAATAGAGCTGAACAATGCAGAGATAACCTTGCAGCTGGATGGTCAGCCACCATTAGCACCAGCCACATTGTCAAAACTAATTGACCAAGATCTAAGGAATTTGCGGTCAGTCATGTCACGCGCTATGAGTAAAACTATATATGTACCTAATGGGTTAACTGAATATCAGAAAAAAGAATTGGCAATTGTTGTGCCGGCATACAAGCTATTGCCAATGTCCGGAACACCCAACCCACACGCAATGTTGGCAGCTGAAAGAAGAATTTGTGCGGTTACGATGG…	472	14727	KX977568.1 Bell pepper endornavirus isolate Santa Fe, complete genome
TRINITY_DN749_c0_g1_i1	KX977569.1	99.364	472	3	0	1	472	738	1209	0	838	KX977569.1	928	469	469	0	99.36	1	1	TGACTAAGTCAAGATGTGGAGTCTGTTTGCAACCGCTATTGGTTAGAACAATGATGCCTGAATGCATTATGTGGGGCATGTTGGAGGTGATTGATATTACACAATTGCGAGTGGGAGCAATAGAGTTGAACAACGCAGAGATAACCTTGCAGCTGGATGGTCAGCCACCATTAGCACCAGCCACATTGTCAAAACTAATTGACCAAGATCTAAGGAATTTGCGGTCAGTCATGTCACGCGCTATGAGTAAAACTATATATGTACCTAATGGGTTAACTGAATATCAGAAAAAAGAATTGGCAATTGTTGTGCCGGCATACAAGTTATTGCCAATGTCCGGAACACCCAACCCACACGCAATGTTGGCAGCTGAAAGAAGAATTTGTGCGGTTACGATGG…	TGACTAAGTCAAGATGTGGAGTCTGTTTGCAACCGCTATTGGTTAGAACAATGATGCCTGAATGCATTATGTGGGGCATGTTGGAGGTGATTGATATTACACAATTGCGAGTGGGAGCAATAGAGCTGAACAATGCAGAGATAACCTTGCAGCTGGATGGTCAGCCACCATTAGCACCAGCCACATTGTCAAAACTAATTGACCAAGATCTAAGGAATTTGCGGTCAGTCATGTCACGCGCTATGAGTAAAACTATATATGTACCTAATGGGTTAACTGAATATCAGAAAAAAGAATTGGCAATTGTTGTGCCGGCATACAAGCTATTGCCAATGTCCGGAACACCCAACCCACACGCAATGTTGGCAGCTGAAAGAAGAATTTGTGCGGTTACGATGG…	472	14714	KX977569.1 Bell pepper endornavirus isolate Penol, complete genome
TRINITY_DN749_c0_g1_i1	AB597230.1	98.941	472	5	0	1	472	737	1208	0	829	AB597230.1	918	467	467	0	98.94	1	1	TGACTAAGTCAAGATGTGGAGTCTGTTTGCAACCGCTATTGGTTAGAACAATGATGCCTGAATGCATTATGTGGGGCATGTTGGAGGTGATTGATATTACACAATTGCGAGTGGGAGCAATAGAGTTGAACAACGCAGAGATAACCTTGCAGCTGGATGGTCAGCCACCATTAGCACCAGCCACATTGTCAAAACTAATTGACCAAGATCTAAGGAATTTGCGGTCAGTCATGTCACGCGCTATGAGTAAAACTATATATGTACCTAATGGGTTAACTGAATATCAGAAAAAAGAATTGGCAATTGTTGTGCCGGCATACAAGTTATTGCCAATGTCCGGAACACCCAACCCACACGCAATGTTGGCAGCTGAAAGAAGAATTTGTGCGGTTACGATGG…	TGACTAAGTCAAGATGTGGAGTCTGTTTGCAACCGCTATTGGTTAGAACAATGATGCCTGAATGCATTATGTGGGGCATGTTGGAGGTGATTGATATTACACAATTGCGAGTGGGAGCAATAGAGTTGAACAATGCAGAGATAACCTTGCAGCTGGATGGTCAGCCACCATTAGCACCAGCCACATTGTCAAAACTAATTGACCAAGATCTAAGGAATTTGCGGTCAGTCATGTCACGCGCTATGAGTAAAACTATATATGTACCTAATGGGTTGACTGAATATCAGAAAAAAGAATTGGCAATTGTTGTGCCGGCATACAAGCTATTGCCAATGTCCGGAACACCCAACCCACACGCAATGTTGGCAGCTGAAAGAAGAATTTGTGCGGTTACGATGG…	472	14727	AB597230.1 Bell pepper endornavirus genomic RNA, complete genome, host: Capsicum annuum cv. Kyosuzu
TRINITY_DN749_c0_g1_i1	JQ951943.1	98.941	472	5	0	1	472	737	1208	0	829	JQ951943.1	918	467	467	0	98.94	1	1	TGACTAAGTCAAGATGTGGAGTCTGTTTGCAACCGCTATTGGTTAGAACAATGATGCCTGAATGCATTATGTGGGGCATGTTGGAGGTGATTGATATTACACAATTGCGAGTGGGAGCAATAGAGTTGAACAACGCAGAGATAACCTTGCAGCTGGATGGTCAGCCACCATTAGCACCAGCCACATTGTCAAAACTAATTGACCAAGATCTAAGGAATTTGCGGTCAGTCATGTCACGCGCTATGAGTAAAACTATATATGTACCTAATGGGTTAACTGAATATCAGAAAAAAGAATTGGCAATTGTTGTGCCGGCATACAAGTTATTGCCAATGTCCGGAACACCCAACCCACACGCAATGTTGGCAGCTGAAAGAAGAATTTGTGCGGTTACGATGG…	TGACTAAGTCAAGATGTGGAGTCTGTTTGCAACCGCTATTGGTTAGAACAATGATGCCTGAATGCATTATGTGGGGCATGTTGGAGGTGATTGATATTACACAATTGCGAGTGGGAGCAATAGAGTTGAACAATGCAGAGATAACCTTGCAGCTGGATGGTCAGCCACCATTAGCACCAGCCACATTGTCAAAACTAATTGACCAAGATCTAAGGAATTTGCGGTCAGTCATGTCACGCGCTATGAGTAAAACTATATATGTACCTAATGGGTTGACTGAATATCAGAAAAAAGAATTGGCAATTGTTGTGCCGGCATACAAGCTATTGCCAATGTCCGGAACACCCAACCCACACGCAATGTTGGCAGCTGAAAGAAGAATTTGTGCGGTTACGATGG…	472	14727	JQ951943.1 Bell pepper endornavirus strain IS RNA-dependent RNA polymerase (RdRp) gene, complete cds
TRINITY_DN749_c0_g1_i1	NC_015781.2	86.864	472	62	0	1	472	738	1209	1.11e-162	572	NC_015781.2	634	410	410	0	86.86	1	1	TGACTAAGTCAAGATGTGGAGTCTGTTTGCAACCGCTATTGGTTAGAACAATGATGCCTGAATGCATTATGTGGGGCATGTTGGAGGTGATTGATATTACACAATTGCGAGTGGGAGCAATAGAGTTGAACAACGCAGAGATAACCTTGCAGCTGGATGGTCAGCCACCATTAGCACCAGCCACATTGTCAAAACTAATTGACCAAGATCTAAGGAATTTGCGGTCAGTCATGTCACGCGCTATGAGTAAAACTATATATGTACCTAATGGGTTAACTGAATATCAGAAAAAAGAATTGGCAATTGTTGTGCCGGCATACAAGTTATTGCCAATGTCCGGAACACCCAACCCACACGCAATGTTGGCAGCTGAAAGAAGAATTTGTGCGGTTACGATGG…	TGACTAAATCAAGATGTGGAGTCTGTTTGCAACCGTTGTTGATTAGACGGATGATGCCTGAGTGCATCATGTGGGGAATGCTGGAGGTAGCCGATGTAACACAATTGCGCGTGGGAGCAATAGAGCTGAACAATGCAGAAATAACATTACAACTAGACGGTCAACCACCACTAGCACCAGCCACGTTGTCTAAGTTGATTGATCAGGATTTAAGGAATTTAAGGTCAGTCATGTCACGCGCTATGAGCAAAACCATATATGTACCTAATGGGTTAACTGAATATCAGAAAAAAGAGTTGGCAATTGTGGTGCCGGCCTACAAACTATTGCCAATGTCAGGAACACCCAACCCACATGCAATGCTAGCAGCTGAAAGAAGAATTTGCGCAGTTACAATGG…	472	14728	NC_015781.2 Bell pepper endornavirus, complete genome
TRINITY_DN749_c0_g1_i1	NC_027920.1	75.745	470	114	0	3	472	740	1209	5.04e-91	334	NC_027920.1	370	356	356	0	75.74	1	1	ACTAAGTCAAGATGTGGAGTCTGTTTGCAACCGCTATTGGTTAGAACAATGATGCCTGAATGCATTATGTGGGGCATGTTGGAGGTGATTGATATTACACAATTGCGAGTGGGAGCAATAGAGTTGAACAACGCAGAGATAACCTTGCAGCTGGATGGTCAGCCACCATTAGCACCAGCCACATTGTCAAAACTAATTGACCAAGATCTAAGGAATTTGCGGTCAGTCATGTCACGCGCTATGAGTAAAACTATATATGTACCTAATGGGTTAACTGAATATCAGAAAAAAGAATTGGCAATTGTTGTGCCGGCATACAAGTTATTGCCAATGTCCGGAACACCCAACCCACACGCAATGTTGGCAGCTGAAAGAAGAATTTGTGCGGTTACGATGGGT…	ACAAAATCAAGGTGCGGTGTGTGTTTGCAACCATTACTAATTGATAAAATGCTACCAGAATGCATAGCGTGGGGTATGTTAGAAGTAGTAGATATAACACAACTGAGAGTTGGTGCTATTGAGCTCAACAATGCAGAGATAACACTGCAACTAGATGGGCAACCACCATTAAGTGCAGCCACGTTGGCGAAGTTGATAGACCAAGATTTGAGGAATTTAAGGTCAGTCATGTCACGCGCAATGAGCAAAACAATTTACGTGCCAAATGGATTGACAGACTATCAGAAGAAAGAGTTGGCCATTGCGGTTCCAGCTTACAAACTCTTACCGATGTCTGGAACTCCAAACCCACATGCCATGTTAGCTGCTGAACGGAGAGTTTGTGCAGTGACTATGGGC…	472	14729	NC_027920.1 Hot pepper endornavirus isolate CS, complete genome
TRINITY_DN749_c1_g1_i1	JQ951943.1	99.738	381	1	0	1	381	759	379	0	682	JQ951943.1	756	380	380	0	99.74	1	-1	GACTCCACATCTTGACTTAGTCAATCCTTCAGTTTCGTCTAATAACCACACTAAATTTGTGATTCCACAACACGAACACGTCATCGCTGCTTCTACATTTGGCAATTCCATGGCTTTGTAACCATACGAATTTCCTATTTTGTATACGTGTGGGGTCATGTTATAATTGTTTACACAATCAAGTAGAACCATGTTAATGACACTACCACCAAACTTTTTAATCAAACCTGTCAACAATTTTGAGGCAGCTTCAGTTTTTGTGCCGTCTTGTTTTGATGGTGGTAGTAACATCGGCCTGCAATTGGCATAGTACATTTTACTAGGTCCACCGTAAAACGGTTCTGTGCTTTGAAATTGACTTTGTTGTAGGTATTTGACAAC	GACTCCACATCTTGACTTAGTCAATCCTTCAGTTTCGTCTAATAACCACACTAAATTTGTGATTCCACAACACGAACACGTCATCGCTGCTTCTACATTTGGCAATTCCATGGCTTTGTAACCATACGAATTTCCTATTTTGTATACGTGTGGGGTCATGTTATAATTGTTTACACAATCAAGTAGAACCATGTTAATGACACTACCACCAAACTTTTTAATCAAACCTGTCAACAATTTTGAGGCAGCTTCAGTTTTTGTGCCGTCTTGTTTTGATGGTGGTAGTAACATCGGCCTGCAATTGGCATAGTACATTTTACTAGGTCCACCGTAAAACGGTTCTGTGCTTTGCAATTGACTTTGTTGTAGGTATTTGACAAC	381	14727	JQ951943.1 Bell pepper endornavirus strain IS RNA-dependent RNA polymerase (RdRp) gene, complete cds
TRINITY_DN749_c1_g1_i1	KT149366.1	99.738	381	1	0	1	381	759	379	0	682	KT149366.1	756	380	380	0	99.74	1	-1	GACTCCACATCTTGACTTAGTCAATCCTTCAGTTTCGTCTAATAACCACACTAAATTTGTGATTCCACAACACGAACACGTCATCGCTGCTTCTACATTTGGCAATTCCATGGCTTTGTAACCATACGAATTTCCTATTTTGTATACGTGTGGGGTCATGTTATAATTGTTTACACAATCAAGTAGAACCATGTTAATGACACTACCACCAAACTTTTTAATCAAACCTGTCAACAATTTTGAGGCAGCTTCAGTTTTTGTGCCGTCTTGTTTTGATGGTGGTAGTAACATCGGCCTGCAATTGGCATAGTACATTTTACTAGGTCCACCGTAAAACGGTTCTGTGCTTTGAAATTGACTTTGTTGTAGGTATTTGACAAC	GACTCCACATCTTGACTTAGTCAATCCTTCAGTTTCGTCTAATAACCACACTAAATTTGTGATTCCACAACACGAACACGTCATCGCTGCTTCTACATTTGGCAATTCCATGGCTTTGTAACCATACGAATTTCCTATTTTGTATACGTGTGGGGTCATGTTATAATTGTTTACACAATCAAGTAGAACCATGTTAATGACACTACCACCAAACTTTTTAATCAAACCTGTCAACAATTTTGAGGCAGCTTCAGTTTTTGTGCCGTCTTGTTTTGATGGTGGTAGTAACATCGGCCTGCAATTGGCATAGTACATTTTACTAGGTCCACCGTAAAACGGTTCTGTGCTTTGCAATTGACTTTGTTGTAGGTATTTGACAAC	381	14726	KT149366.1 Bell pepper endornavirus, complete genome
TRINITY_DN749_c1_g1_i1	KP455654.1	99.738	381	1	0	1	381	699	319	0	682	KP455654.1	756	380	380	0	99.74	1	-1	GACTCCACATCTTGACTTAGTCAATCCTTCAGTTTCGTCTAATAACCACACTAAATTTGTGATTCCACAACACGAACACGTCATCGCTGCTTCTACATTTGGCAATTCCATGGCTTTGTAACCATACGAATTTCCTATTTTGTATACGTGTGGGGTCATGTTATAATTGTTTACACAATCAAGTAGAACCATGTTAATGACACTACCACCAAACTTTTTAATCAAACCTGTCAACAATTTTGAGGCAGCTTCAGTTTTTGTGCCGTCTTGTTTTGATGGTGGTAGTAACATCGGCCTGCAATTGGCATAGTACATTTTACTAGGTCCACCGTAAAACGGTTCTGTGCTTTGAAATTGACTTTGTTGTAGGTATTTGACAAC	GACTCCACATCTTGACTTAGTCAATCCTTCAGTTTCGTCTAATAACCACACTAAATTTGTGATTCCACAACACGAACACGTCATCGCTGCTTCTACATTTGGCAATTCCATGGCTTTGTAACCATACGAATTTCCTATTTTGTATACGTGTGGGGTCATGTTATAATTGTTTACACAATCAAGTAGAACCATGTTAATGACACTACCACCAAACTTTTTAATCAAACCTGTCAACAATTTTGAGGCAGCTTCAGTTTTTGTGCCGTCTTGTTTTGATGGTGGTAGTAACATCGGCCTGCAATTGGCATAGTACATTTTACTAGGTCCACCGTAAAACGGTTCTGTGCTTTGCAATTGACTTTGTTGTAGGTATTTGACAAC	381	14659	KP455654.1 Bell pepper endornavirus isolate Maor, complete genome
TRINITY_DN749_c1_g1_i1	KX525267.1	99.738	381	1	0	1	381	763	383	0	682	KX525267.1	756	380	380	0	99.74	1	-1	GACTCCACATCTTGACTTAGTCAATCCTTCAGTTTCGTCTAATAACCACACTAAATTTGTGATTCCACAACACGAACACGTCATCGCTGCTTCTACATTTGGCAATTCCATGGCTTTGTAACCATACGAATTTCCTATTTTGTATACGTGTGGGGTCATGTTATAATTGTTTACACAATCAAGTAGAACCATGTTAATGACACTACCACCAAACTTTTTAATCAAACCTGTCAACAATTTTGAGGCAGCTTCAGTTTTTGTGCCGTCTTGTTTTGATGGTGGTAGTAACATCGGCCTGCAATTGGCATAGTACATTTTACTAGGTCCACCGTAAAACGGTTCTGTGCTTTGAAATTGACTTTGTTGTAGGTATTTGACAAC	GACTCCACATCTTGACTTAGTCAATCCTTCAGTTTCGTCTAATAACCACACTAAATTTGTGATTCCACAACACGAACACGTCATCGCTGCTTCTACATTTGGCAATTCCATGGCTTTGTAACCATACGAATTTCCTATTTTGTATACGTGTGGGGTCATGTTATAATTGTTTACACAATCAAGTAGAACCATGTTAATGACACTACCACCAAACTTTTTAATCAAACCTGTCAACAATTTTGAGGCAGCTTCAGTTTTTGTGCCGTCTTGTTTTGATGGTGGTAGTAACATCGGCCTGCAATTGGCATAGTACATTTTACTAGGTCCACCGTAAAACGGTTCTGTGCTTTGCAATTGACTTTGTTGTAGGTATTTGACAAC	381	14790	KX525267.1 Bell pepper endornavirus isolate DR Polyprotein gene, complete cds
TRINITY_DN749_c1_g1_i1	AB597230.1	99.475	381	2	0	1	381	759	379	0	679	AB597230.1	752	379	379	0	99.48	1	-1	GACTCCACATCTTGACTTAGTCAATCCTTCAGTTTCGTCTAATAACCACACTAAATTTGTGATTCCACAACACGAACACGTCATCGCTGCTTCTACATTTGGCAATTCCATGGCTTTGTAACCATACGAATTTCCTATTTTGTATACGTGTGGGGTCATGTTATAATTGTTTACACAATCAAGTAGAACCATGTTAATGACACTACCACCAAACTTTTTAATCAAACCTGTCAACAATTTTGAGGCAGCTTCAGTTTTTGTGCCGTCTTGTTTTGATGGTGGTAGTAACATCGGCCTGCAATTGGCATAGTACATTTTACTAGGTCCACCGTAAAACGGTTCTGTGCTTTGAAATTGACTTTGTTGTAGGTATTTGACAAC	GACTCCACATCTTGACTTAGTCAATCCTTCAGTTTCGTCTAATAACCACACCAAATTTGTGATTCCACAACACGAACACGTCATCGCTGCTTCTACATTTGGCAATTCCATGGCTTTGTAACCATACGAATTTCCTATTTTGTATACGTGTGGGGTCATGTTATAATTGTTTACACAATCAAGTAGAACCATGTTAATGACACTACCACCAAACTTTTTAATCAAACCTGTCAACAATTTTGAGGCAGCTTCAGTTTTTGTGCCGTCTTGTTTTGATGGTGGTAGTAACATCGGCCTGCAATTGGCATAGTACATTTTACTAGGTCCACCGTAAAACGGTTCTGTGCTTTGCAATTGACTTTGTTGTAGGTATTTGACAAC	381	14727	AB597230.1 Bell pepper endornavirus genomic RNA, complete genome, host: Capsicum annuum cv. Kyosuzu
TRINITY_DN749_c1_g1_i1	KX977568.1	99.213	381	3	0	1	381	766	386	0	673	KX977568.1	746	378	378	0	99.21	1	-1	GACTCCACATCTTGACTTAGTCAATCCTTCAGTTTCGTCTAATAACCACACTAAATTTGTGATTCCACAACACGAACACGTCATCGCTGCTTCTACATTTGGCAATTCCATGGCTTTGTAACCATACGAATTTCCTATTTTGTATACGTGTGGGGTCATGTTATAATTGTTTACACAATCAAGTAGAACCATGTTAATGACACTACCACCAAACTTTTTAATCAAACCTGTCAACAATTTTGAGGCAGCTTCAGTTTTTGTGCCGTCTTGTTTTGATGGTGGTAGTAACATCGGCCTGCAATTGGCATAGTACATTTTACTAGGTCCACCGTAAAACGGTTCTGTGCTTTGAAATTGACTTTGTTGTAGGTATTTGACAAC	GACTCCACATCTTGACTTAGTCAATCCTTCAGTTTCGTCTAATAACCACACCAAATTTGTGATTCCACAACACGAACACGTCATCGCTGCTTCTACATTTGGCAATTCCATGGCTTTGTAACCATACGAATTTCCTATTTTGTATACGTGTGGGGTCATGTTATAATTGTTTACACAATCAAGTAGAACCATGTTAATGACACTGCCACCAAACTTTTTAATCAAACCTGTCAACAATTTTGAGGCAGCTTCAGTTTTTGTGCCGTCTTGTTTTGATGGTGGTAGTAACATCGGCCTGCAATTGGCATAGTACATTTTACTAGGTCCACCGTAAAACGGTTCTGTGCTTTGCAATTGACTTTGTTGTAGGTATTTGACAAC	381	14727	KX977568.1 Bell pepper endornavirus isolate Santa Fe, complete genome
TRINITY_DN749_c1_g1_i1	KX977569.1	99.213	381	3	0	1	381	760	380	0	673	KX977569.1	746	378	378	0	99.21	1	-1	GACTCCACATCTTGACTTAGTCAATCCTTCAGTTTCGTCTAATAACCACACTAAATTTGTGATTCCACAACACGAACACGTCATCGCTGCTTCTACATTTGGCAATTCCATGGCTTTGTAACCATACGAATTTCCTATTTTGTATACGTGTGGGGTCATGTTATAATTGTTTACACAATCAAGTAGAACCATGTTAATGACACTACCACCAAACTTTTTAATCAAACCTGTCAACAATTTTGAGGCAGCTTCAGTTTTTGTGCCGTCTTGTTTTGATGGTGGTAGTAACATCGGCCTGCAATTGGCATAGTACATTTTACTAGGTCCACCGTAAAACGGTTCTGTGCTTTGAAATTGACTTTGTTGTAGGTATTTGACAAC	GACTCCACATCTTGACTTAGTCAATCCTTCAGTTTCGTCTAATAACCACACCAAATTTGTGATTCCACAACACGAACACGTCATCGCTGCTTCTACATTTGGCAATTCCATGGCTTTGTAACCATACGAATTTCCTATTTTGTATACGTGTGGGGTCATGTTATAATTGTTTACACAATCAAGTAGAACCATGTTAATGACACTGCCACCAAACTTTTTAATCAAACCTGTCAACAATTTTGAGGCAGCTTCAGTTTTTGTGCCGTCTTGTTTTGATGGTGGTAGTAACATCGGCCTGCAATTGGCATAGTACATTTTACTAGGTCCACCGTAAAACGGTTCTGTGCTTTGCAATTGACTTTGTTGTAGGTATTTGACAAC	381	14714	KX977569.1 Bell pepper endornavirus isolate Penol, complete genome
TRINITY_DN749_c1_g1_i1	NC_015781.2	90.667	375	35	0	1	375	760	386	1.7e-146	518	NC_015781.2	574	340	340	0	90.67	1	-1	GACTCCACATCTTGACTTAGTCAATCCTTCAGTTTCGTCTAATAACCACACTAAATTTGTGATTCCACAACACGAACACGTCATCGCTGCTTCTACATTTGGCAATTCCATGGCTTTGTAACCATACGAATTTCCTATTTTGTATACGTGTGGGGTCATGTTATAATTGTTTACACAATCAAGTAGAACCATGTTAATGACACTACCACCAAACTTTTTAATCAAACCTGTCAACAATTTTGAGGCAGCTTCAGTTTTTGTGCCGTCTTGTTTTGATGGTGGTAGTAACATCGGCCTGCAATTGGCATAGTACATTTTACTAGGTCCACCGTAAAACGGTTCTGTGCTTTGAAATTGACTTTGTTGTAGGTATTT	GACTCCACATCTTGATTTAGTCAATCCTTCGGTTTCGTCCAATAACCACACTAAATTTGTGATTCCACAACATGAACATGACATTGCTGCCTCTACGTTTGGCAATTCCATGGCTTTGTAACCATAAGAGTTTCCTATCTTGTATACATGTGGGGTCATGTTGTAATTGTTTGCACAATCAAGTAGAACCATGTTTATGACACTTCCACCAAATTTTTTAATCAAGCCTGTCAATAGTTTTGAAGCAGCTTCAGTTTTAGTACCGTCTTGTTTTGAAGGTGGTAGTAACATAGGTCTGCAATTAGCATAGTACATTTTACTAGGTCCTCCATAAAATGGTTCTGTGCTTTGCAATTGGCTTTGTTGTAAATATTT	381	14728	NC_015781.2 Bell pepper endornavirus, complete genome
TRINITY_DN749_c1_g1_i1	NC_027920.1	77.929	367	81	0	2	368	759	393	1.01e-79	297	NC_027920.1	328	286	286	0	77.93	1	-1	ACTCCACATCTTGACTTAGTCAATCCTTCAGTTTCGTCTAATAACCACACTAAATTTGTGATTCCACAACACGAACACGTCATCGCTGCTTCTACATTTGGCAATTCCATGGCTTTGTAACCATACGAATTTCCTATTTTGTATACGTGTGGGGTCATGTTATAATTGTTTACACAATCAAGTAGAACCATGTTAATGACACTACCACCAAACTTTTTAATCAAACCTGTCAACAATTTTGAGGCAGCTTCAGTTTTTGTGCCGTCTTGTTTTGATGGTGGTAGTAACATCGGCCTGCAATTGGCATAGTACATTTTACTAGGTCCACCGTAAAACGGTTCTGTGCTTTGAAATTGACTTTGTTGTA	ACACCGCACCTTGATTTTGTAAGCCCTTCAGTTTCGTCTAGTAGCCACACCAAATTAACAATACCGCAACACGCACAGGTCATTGCTGCTTCCACATTTGGTAGTTCCATAGCTTTATATCCATATGAAGAACCTATCTTATAAACATGCGGTGTCATGGAGTAATTGTTTGCACAGTCCAATAAAACCATGTTTATAACACTACCTCCAAATTTCTGTATTAGACCTGTTAGCAGACTAGATGCTGCTTCAGTCTTTGTACCATCTATCTTTGAGGGTGGTAATAGCATTGGCCTACAATTTGCATAATACATTTTACTGGGACCACCATAAAATGGTTCAGTGCTTTGCAATTGACTTTGCTGTA	381	14729	NC_027920.1 Hot pepper endornavirus isolate CS, complete genome
TRINITY_DN865_c0_g1_i1	KP455654.1	99.89	912	1	0	1	912	14202	13291	0	1640	KP455654.1	1818	911	911	0	99.89	1	-1	ATTGTGTTTGATCTTTGTCTCATTGTTTAGTCGACTGAGATCTATGCTCGTATTGGTAAACATGAGACCATCATCTCCTAAAATTAAAAACAATCTTAGATTATGTCCGAGCCGGTTAACTAATCGTCTATGCACCAACATATTGGTTATAGCATTTCCCAGAGCTGTGGTTGCTTGACCAGTCAATCTCATGGCATCTCCCTCTCCTCTTACTGTCCTGGATTTGTATTTCCAATTGAAATGACTGTTGTGCCACAAGGTTATAACATCGTCATGCACCCCTAACAGTTTGTACAGTGCCATTTCAAATTTAATTATTTCATGGTCAGTTTGTTTGTCTTGCTGTGCTAAGTCATTTTCTAATAAATATTTTACGCCTGTGGTTAGTCTTACTCTTGC…	ATTGTGTTTGATCTTTGTCTCATTGTTTAGTCGACTGAGATCTATGCTCGTATTGGTAAACATGAGACCATCATCTCCTAAAATTAAAAACAATCTTAGATTATGTCCGAGCCGGTTAACTAATCGTCTATGCACCAACATATTGGTTATAGCATTTCCCAGAGCTGTGGTTGCTTGACCAGTCAATCTCATGGCATCTCCCTCTCCTCTTACTGTCCTGGATTTGTATTTCCAATTGAAATGACTGTTGTGCCACAAGGTTATAACATCGTCATGCACCCCTAACAGTTTGTACAGTGCCATTTCAAATTTAATTATTTCATGGTCAGTTTGTTTGTCTTGCTGTGCTAAGTCATTTTCTAATAAATATTTTACACCTGTGGTTAGTCTTACTCTTGC…	912	14659	KP455654.1 Bell pepper endornavirus isolate Maor, complete genome
TRINITY_DN865_c0_g1_i1	KX525267.1	99.89	912	1	0	1	912	14266	13355	0	1640	KX525267.1	1818	911	911	0	99.89	1	-1	ATTGTGTTTGATCTTTGTCTCATTGTTTAGTCGACTGAGATCTATGCTCGTATTGGTAAACATGAGACCATCATCTCCTAAAATTAAAAACAATCTTAGATTATGTCCGAGCCGGTTAACTAATCGTCTATGCACCAACATATTGGTTATAGCATTTCCCAGAGCTGTGGTTGCTTGACCAGTCAATCTCATGGCATCTCCCTCTCCTCTTACTGTCCTGGATTTGTATTTCCAATTGAAATGACTGTTGTGCCACAAGGTTATAACATCGTCATGCACCCCTAACAGTTTGTACAGTGCCATTTCAAATTTAATTATTTCATGGTCAGTTTGTTTGTCTTGCTGTGCTAAGTCATTTTCTAATAAATATTTTACGCCTGTGGTTAGTCTTACTCTTGC…	ATTGTGTTTGATCTTTGTCTCATTGTTTAGTCGACTGAGATCTATGCTCGTATTGGTAAACATGAGACCATCATCTCCTAAAATTAAAAACAATCTTAGATTATGTCCGAGCCGGTTAACTAATCGTCTATGCACCAACATATTGGTTATAGCATTTCCCAGAGCTGTGGTTGCTTGACCAGTCAATCTCATGGCATCTCCCTCTCCTCTTACTGTCCTGGATTTGTATTTCCAATTGAAATGACTGTTGTGCCACAAGGTTATAACATCGTCATGCACCCCTAACAGTTTGTACAGTGCCATTTCAAATTTAATTATTTCATGGTCAGTTTGTTTGTCTTGCTGTGCTAAGTCATTTTCTAATAAATATTTTACACCTGTGGTTAGTCTTACTCTTGC…	912	14790	KX525267.1 Bell pepper endornavirus isolate DR Polyprotein gene, complete cds
TRINITY_DN865_c0_g1_i1	KT149366.1	99.671	912	3	0	1	912	14262	13351	0	1631	KT149366.1	1808	909	909	0	99.67	1	-1	ATTGTGTTTGATCTTTGTCTCATTGTTTAGTCGACTGAGATCTATGCTCGTATTGGTAAACATGAGACCATCATCTCCTAAAATTAAAAACAATCTTAGATTATGTCCGAGCCGGTTAACTAATCGTCTATGCACCAACATATTGGTTATAGCATTTCCCAGAGCTGTGGTTGCTTGACCAGTCAATCTCATGGCATCTCCCTCTCCTCTTACTGTCCTGGATTTGTATTTCCAATTGAAATGACTGTTGTGCCACAAGGTTATAACATCGTCATGCACCCCTAACAGTTTGTACAGTGCCATTTCAAATTTAATTATTTCATGGTCAGTTTGTTTGTCTTGCTGTGCTAAGTCATTTTCTAATAAATATTTTACGCCTGTGGTTAGTCTTACTCTTGC…	ATTGTGTTTGATCTTTGTCTCATTGTTTAGTCGACTGAGATCTATGCTCGTATTGGTAAACATGAGACCATCATCTCCTAAAATTAAAAACAATCTTAGATTATGTCCGAGCCGGTTAACTAATCGTCTATGCACCAACATATTGGTTATAGCATTTCCCAGAGCTGTGGTTGCTTGACCAGTCAATCTCATGGCATCTCCCTCTCCTCTTACTGTCCTGGATTTGTATTTCCAATTGAAATGACTGTTGTGCCACAAGGTTATAACATCGTCATGCACCCCTAACAGTTTGTACAGTGCCATTTCAAATTTAATTATTTCATGGTCAGTTTGTTTGTCTTGCTGTGCTAAGTCATTTTCTAATAAATATTTTACACCTGTGGTTAGTCTTACTCTTGC…	912	14726	KT149366.1 Bell pepper endornavirus, complete genome
TRINITY_DN865_c0_g1_i1	AB597230.1	99.561	912	4	0	1	912	14262	13351	0	1627	AB597230.1	1804	908	908	0	99.56	1	-1	ATTGTGTTTGATCTTTGTCTCATTGTTTAGTCGACTGAGATCTATGCTCGTATTGGTAAACATGAGACCATCATCTCCTAAAATTAAAAACAATCTTAGATTATGTCCGAGCCGGTTAACTAATCGTCTATGCACCAACATATTGGTTATAGCATTTCCCAGAGCTGTGGTTGCTTGACCAGTCAATCTCATGGCATCTCCCTCTCCTCTTACTGTCCTGGATTTGTATTTCCAATTGAAATGACTGTTGTGCCACAAGGTTATAACATCGTCATGCACCCCTAACAGTTTGTACAGTGCCATTTCAAATTTAATTATTTCATGGTCAGTTTGTTTGTCTTGCTGTGCTAAGTCATTTTCTAATAAATATTTTACGCCTGTGGTTAGTCTTACTCTTGC…	ATTGTGTTTGATCTTTGTCTCATTGTTTAGTCGACTGAGATCTATGCTCGTATTGGTAAACATGAGACCATCATCTCCTAAAATTAAAAACAATCTTAGATTGTGTCCGAGCCGGTTAACTAATCGTCTATGCACCAACATATTGGTTATAGCATTTCCCAGAGCTGTGGTTGCTTGACCAGTCAATCTCATGGCATCTCCCTCTCCTCTTACTGTCCTGGATTTGTATTTCCAATTGAAATGACTGTTGTGCCACAAGGTTATAACATCGTCATGCACCCCTAACAGTTTGTACAGTGCCATTTCAAATTTAATTATTTCATGGTCAGTTTGTTTGTCTTGCTGTGCTAAGTCATTTTCTAATAAATATTTTACACCTGTGGTTAGTCTTACTCTTGC…	912	14727	AB597230.1 Bell pepper endornavirus genomic RNA, complete genome, host: Capsicum annuum cv. Kyosuzu
TRINITY_DN865_c0_g1_i1	KX977568.1	99.452	912	5	0	1	912	14272	13361	0	1622	KX977568.1	1798	907	907	0	99.45	1	-1	ATTGTGTTTGATCTTTGTCTCATTGTTTAGTCGACTGAGATCTATGCTCGTATTGGTAAACATGAGACCATCATCTCCTAAAATTAAAAACAATCTTAGATTATGTCCGAGCCGGTTAACTAATCGTCTATGCACCAACATATTGGTTATAGCATTTCCCAGAGCTGTGGTTGCTTGACCAGTCAATCTCATGGCATCTCCCTCTCCTCTTACTGTCCTGGATTTGTATTTCCAATTGAAATGACTGTTGTGCCACAAGGTTATAACATCGTCATGCACCCCTAACAGTTTGTACAGTGCCATTTCAAATTTAATTATTTCATGGTCAGTTTGTTTGTCTTGCTGTGCTAAGTCATTTTCTAATAAATATTTTACGCCTGTGGTTAGTCTTACTCTTGC…	ATTGTGTTTGATCTTTGTCTCATTGTTTAGTCGACTGAGATCTATGCTCGTATTGGTAAACATGAGACCATCATCTCCTAAAATTAAAAACAATCTTAGATTATGTCCGAGCCGGTTAACTAATCGTCTATGCACCAACATATTGGTTATAGCATTTCCCAGAGCTGTAGTTGCTTGACCAGTCAATCTCATGGCATCTCCCTCTCCTCTTACTGTCCTGGATTTGTATTTCCAATTGAAATGACTGTTGTGCCACAAGGTTATAACATCGTCATGCACCCCTAACAGTTTGTACAGTGCCATTTCAAATTTAATTATTTCATGGTCAGTTTGTTTGTCTTGCTGTGCTAAGTCATTTTCTAATAAATATTTTACACCTGTGGTTAGTCTTACTCTTGC…	912	14727	KX977568.1 Bell pepper endornavirus isolate Santa Fe, complete genome
TRINITY_DN865_c0_g1_i1	KX977569.1	99.452	912	5	0	1	912	14263	13352	0	1622	KX977569.1	1798	907	907	0	99.45	1	-1	ATTGTGTTTGATCTTTGTCTCATTGTTTAGTCGACTGAGATCTATGCTCGTATTGGTAAACATGAGACCATCATCTCCTAAAATTAAAAACAATCTTAGATTATGTCCGAGCCGGTTAACTAATCGTCTATGCACCAACATATTGGTTATAGCATTTCCCAGAGCTGTGGTTGCTTGACCAGTCAATCTCATGGCATCTCCCTCTCCTCTTACTGTCCTGGATTTGTATTTCCAATTGAAATGACTGTTGTGCCACAAGGTTATAACATCGTCATGCACCCCTAACAGTTTGTACAGTGCCATTTCAAATTTAATTATTTCATGGTCAGTTTGTTTGTCTTGCTGTGCTAAGTCATTTTCTAATAAATATTTTACGCCTGTGGTTAGTCTTACTCTTGC…	ATTGTGTTTGATCTTTGTCTCATTGTTTAGTCGACTGAGATCTATGCTCGTATTGGTAAACATGAGACCATCATCTCCTAAAATTAAAAACAATCTTAGATTATGTCCGAGCCGGTTAACTAATCGTCTATGCACCAACATATTGGTTATAGCATTTCCCAGAGCTGTAGTTGCTTGACCAGTCAATCTCATGGCATCTCCCTCTCCTCTTACTGTCCTGGATTTGTATTTCCAATTGAAATGACTGTTGTGCCACAAGGTTATAACATCGTCATGCACCCCTAACAGTTTGTACAGTGCCATTTCAAATTTAATTATTTCATGGTCAGTTTGTTTGTCTTGCTGTGCTAAGTCATTTTCTAATAAATATTTTACACCTGTGGTTAGTCTTACTCTTGC…	912	14714	KX977569.1 Bell pepper endornavirus isolate Penol, complete genome
TRINITY_DN865_c0_g1_i1	JQ951943.1	99.342	912	6	0	1	912	14262	13351	0	1618	JQ951943.1	1794	906	906	0	99.34	1	-1	ATTGTGTTTGATCTTTGTCTCATTGTTTAGTCGACTGAGATCTATGCTCGTATTGGTAAACATGAGACCATCATCTCCTAAAATTAAAAACAATCTTAGATTATGTCCGAGCCGGTTAACTAATCGTCTATGCACCAACATATTGGTTATAGCATTTCCCAGAGCTGTGGTTGCTTGACCAGTCAATCTCATGGCATCTCCCTCTCCTCTTACTGTCCTGGATTTGTATTTCCAATTGAAATGACTGTTGTGCCACAAGGTTATAACATCGTCATGCACCCCTAACAGTTTGTACAGTGCCATTTCAAATTTAATTATTTCATGGTCAGTTTGTTTGTCTTGCTGTGCTAAGTCATTTTCTAATAAATATTTTACGCCTGTGGTTAGTCTTACTCTTGC…	ATTGTGTTTGATCTTTGTCTCATTGTTTAGTCGACTGAGATCTATGCTCGTATTGGTAAACATGAGACCATCACCTCCTAAAATTAAAAACAATCTTAGATTGTGTCCGAGCCGGTTAACTAATCGTCTATGCACCAACATATTGGTTATAGCATTTCCCAGAGCTGTGGTTGCTTGACCAGTCAATCTCATGGCATCTCCCTCTCCTCTTACTGTCCTGGATTTGTATTTCCAATTGAAATGACTGTTGTGCCACAAGGTTATAACATCGTCATGCACCCCTAACAGTTTGTACAGTGCCATTTCAAATTTAATGATTTCATGGTCAGTTTGTTTGTCTTGCTGTGCTAAGTCATTTTCTAATAAATATTTTACACCTGTGGTTAGTCTTACTCTTGC…	912	14727	JQ951943.1 Bell pepper endornavirus strain IS RNA-dependent RNA polymerase (RdRp) gene, complete cds
TRINITY_DN865_c0_g1_i1	NC_015781.2	90.011	911	91	0	2	912	14262	13352	0	1232	NC_015781.2	1366	820	820	0	90.01	1	-1	TTGTGTTTGATCTTTGTCTCATTGTTTAGTCGACTGAGATCTATGCTCGTATTGGTAAACATGAGACCATCATCTCCTAAAATTAAAAACAATCTTAGATTATGTCCGAGCCGGTTAACTAATCGTCTATGCACCAACATATTGGTTATAGCATTTCCCAGAGCTGTGGTTGCTTGACCAGTCAATCTCATGGCATCTCCCTCTCCTCTTACTGTCCTGGATTTGTATTTCCAATTGAAATGACTGTTGTGCCACAAGGTTATAACATCGTCATGCACCCCTAACAGTTTGTACAGTGCCATTTCAAATTTAATTATTTCATGGTCAGTTTGTTTGTCTTGCTGTGCTAAGTCATTTTCTAATAAATATTTTACGCCTGTGGTTAGTCTTACTCTTGCG…	TTGTGTTTGATTTTTGTTTCATTGTTTAATCGACTAAGATCTATACTTGTGTTGGTAAACATGAGACCGTCATCTCCCAAAATCAGAAACAATCTCAAATTGTGCCCGAGTCGATTAACTAATCTTCTATGCACCAACATGTTGGTTATGGCATTCCCCAGAGCTGTAGTTGCTTGACCAGTCAATCTCATGGCATCTCCCTCTCCTCTCACTGTCCTGGACTTGTATTTCCAGTTAAAATGACTGTTGTGCCACAAGGTTATCACATCATCATGCACCCCTAGCACTTTATACAGTGCCATTTCAAATTTGATTATTTCATGGTCAGTTTGTTTGTCTTGTTGTGCCAAGTCATTTTCTAATAAATATTTTACACCTGTGGTCAGTCTCACTCGTGCG…	912	14728	NC_015781.2 Bell pepper endornavirus, complete genome
TRINITY_DN865_c0_g1_i1	NC_027920.1	79.934	912	183	0	1	912	14263	13352	0	820	NC_027920.1	908	729	729	0	79.93	1	-1	ATTGTGTTTGATCTTTGTCTCATTGTTTAGTCGACTGAGATCTATGCTCGTATTGGTAAACATGAGACCATCATCTCCTAAAATTAAAAACAATCTTAGATTATGTCCGAGCCGGTTAACTAATCGTCTATGCACCAACATATTGGTTATAGCATTTCCCAGAGCTGTGGTTGCTTGACCAGTCAATCTCATGGCATCTCCCTCTCCTCTTACTGTCCTGGATTTGTATTTCCAATTGAAATGACTGTTGTGCCACAAGGTTATAACATCGTCATGCACCCCTAACAGTTTGTACAGTGCCATTTCAAATTTAATTATTTCATGGTCAGTTTGTTTGTCTTGCTGTGCTAAGTCATTTTCTAATAAATATTTTACGCCTGTGGTTAGTCTTACTCTTGC…	ATTGTGTTTTATTTTCGTTTCATTGTTTAGCTTACTCACATCCACATTTGCATTGCTGAACATCAATCCGTCATCACCTAGCACTAAAAACAATCTTAAATTGTTCCCTAAGCTATTCACCAATTTTCTGTGCACCAACATGTTCGTGATTGCATTTCCTAAAGCAGTTGTCGCTTGACCTGTTAACCGCATAGCATCTCCTTCTCCTCTAACCGATTTTGATTTGTATTTCCAATTAAAATGACTATTGTGCCACAGAGTTATAACGTCTTCATGCACGCCCAATAGTTTGTACAATGCCATTTCAAATCTGATGATTTCATGATCGGTTTGTTTGTCTTGTTGAGCCAAGTCGTTTTCCAAGAGATATTTCACTCCTGTTGTTAGCCTCACCCTGGC…	912	14729	NC_027920.1 Hot pepper endornavirus isolate CS, complete genome
TRINITY_DN865_c0_g1_i1	NC_031336.1	67.678	857	253	11	59	903	14112	13268	3.49e-71	269	NC_031336.1	298	580	580	24	67.68	1	-1	AACATGAGACCATCATCTCCTAAAATTAAAAACAATCTTAGATTATGTCCGAGCCGGTTAACTAATCGTC-TATGCACCAACATATTGGTTATAGCATTTCCCAGAGCTGTGGTTGCTTGACCAGTCAATCTCATGGCATCTCCCTCTCCTCTTA-CTGTCCTGGATTTGTATTTCCAATTGAAATGACTGTTGTGCCACAAGGTTATAACATCGTCAT--GCACCCCTAACAGTTTGTACAGTGCCATTTCAAATTTAATTATTTCATGGTCAGTTTGTTTGTCTTGCTGTGCTAAGTCATTTTCTAATAAATATTTTACGCCTGTGGTTAGTCTTACTCTTGCGGACAACTCATCTGCTCTCAATCCGTCAGCATAAACAATGTTTGGTTTTA--AC…	AACATCAACCCATCGTCACCTAGAACTAAAAATAGTTTTAGCTGACTCCCAAGTCTCTTGACCAA-CTTCATGTGAACAAGTAGATTTGTGAGACAATTTCCTATAGCCGTGGTTGCTTGACCTGTTAGTCTCATGGCATC-CCTGATACCCATAGCGGAGGCTGCTTTGTATTTCCAATGAAAATGACAATTGTGCCACAAATTTATCACGTCCGCATTAGCACCC--AGCAGTTTGTAAATCTGCATTTCGAATTTAATGACTTCATGATCCGTTTGTCGATCTTGCTGCACTAGGTCATTTTCCAAGAAGTGGCTGAAATCCTTCACATTTCTCACTATTGACGATAGTTCGTCAGCCCTTAAACCATCGGTGTACACTATGTTGGGCTTAAGTAC…	912	14623	NC_031336.1 Psophocarpus tetragonolobus endornavirus genomic RNA, complete genome
TRINITY_DN865_c0_g1_i1	NC_034216.1	66.013	306	102	2	130	434	14502	14198	4.27e-13	77	NC_034216.1	84	202	202	2	66.01	1	-1	ATGCACCAACATATTGGTTATAGCATTTCCCAGAGCTGTGGTTGCTTGACCAGTCAATCTCATGGCATCTCCCTCTCCTCT-TACTGTCCTGGATTTGTATTTCCAATTGAAATGACTGTTGTGCCACAAGGTTATAACATCGTCATGCACCCCTAACAGTTTGTACAGTGCCATTTCAAATTTAATTATTTCATGGTCAGTTTGTTTGTCTTGCTGTGCTAAGTCATTTTCTAATAAATATTTTACGCCTGTGGTTAGTCTTACTCTTGCGGACAACTCATCTGCTCTCAATCCGTCAGCATAAA	ATGCACTTGCAAATTGGTTATGCAATTACCAATAGCTGTAGTTGCTTGTCCAGTTAGCCTCATACCTTGACCTTGTCCCCAGTAATGGTTTG-ATTTAAATCTCCAAACCTCATGCATCTCTCTCCAGGAGGCTATCACATTAGGGTGAACTCCTAACAAGTCGTACATGTACATTTCAGTGGTTATAATCGGTGCGTCGGTTTGTCTATCTTGTTTTGTCAAGTCATTTTCAAAGAAACCAGCTATGTCTTTGCATAATCTTACTCTAGCTGAAATTTCATCTGGTCTCAATCCATCTGCGTAAA	912	15098	NC_034216.1 Lagenaria siceraria endornavirus-Hubei isolate JZ, complete genome
TRINITY_DN865_c0_g1_i1	NC_023641.1	65.584	308	98	5	131	434	14492	14189	9.4e-09	62.6	NC_023641.1	68	202	202	8	65.58	1	-1	TGCACCAACATATTGGTTATAGCATTTCCCAGAGCTGTGGTTGCTTGACCAGTCAATCTCATGGCATCTCCCTCTCCTCT-TACTGTCCTGGATTTGTATTTCCAATTGAAATGACTGTTGTGCCACAAGGTTATAACATCGTCATGCACCCCTAACAGTTTGTACAGTGCCATTTCAAATTTAATTAT--TTCATG-GTCAGTTTGTTTGTCTTGCTGTGCTAAGTCATTTTCTAATAAATATTTTACGCCTGTGGTTAGTCTTACTCTTGCGGACAACTCATCTGCTCTCAATCCGTCAGCATAAA	TGCACCTGTAAATTGGTTATGCAATTACCAATGGCTGTAGTTGCTTGTCCAGTCAATCTCATGCCTTGACCTTGCCCCCAGTAGTGAT-TCGATTTGAATCTCCAAACTTCATGCATTTCCCTCCAAGAAGCTATCACATTAGGGTGTACTCCCAATAAGTCATACATGTACATTTC---TGTAGTTATAATTGGCGCGTCAGTTTGCCTATCTTGTTTAGTTAAGTCATTTTCAAAGAAACCAGCTATATCTTTGCACAGCCTCACTCTTGCTGAGATTTCATCTGGTCTTAACCCGTCAGCGTAAA	912	15088	NC_023641.1 Lagenaria siceraria endornavirus-California isolate FB, complete genome
TRINITY_DN865_c0_g1_i1	NC_007069.1	83.333	48	8	0	850	897	12589	12542	1.7e-05	51.8	NC_007069.1	56	40	40	0	83.33	1	-1	TCTACCAGTGATGGCATTGAATTCTTGATTTGCTGCTTTGGTTAATAC	TCTACCTGTGACGGCATTAAATTCTTGATTGGCCGCTTTCGTCAAGAC	912	13883	NC_007069.1 Phytophthora endornavirus 1
TRINITY_DN865_c1_g1_i1	KP455654.1	99.645	845	3	0	1	845	12289	13133	0	1510	KP455654.1	1674	842	842	0	99.64	1	1	AATTTGGGTGCAGAAAAATGTTTGGGATTAGGTTTTGAATTAACAAGTGAATTATGGAACAAGATAACAGCTAGAGTTACACCATTGCGCCACATGATTCACAAAGGGGAGCACAAAGTGGCGTTGGAATTCTCCAACCAAGCTCAGAGATTAACATTCACATCTATAGCACACAGCAGTGAAATAGATTACATCGCAGAAGGTAACAGTGTGTATGTGTCATTGGCTAACCTGGACAAATTAAAAGAACAATGCTTAGAAGAATGGGCCATTTATATGGGAATGACCAACGGGCAAGTACCACACATAGATGATGTTTTATCCAAGTTGTCAAATTGGGTGCCGCTAAGTGAATTTTTAAGTGAACACGGCGGTGAAGTGAACCCAAACCATGTGTTT…	AAATTGGGTGCAGAAAAATGTTTGGGATTAGGTTTTGAATTAACAAGTGAATTATGGAACAAGATAACAGCTAGAGTTACACCATTGCGCCACATGATTCACAAAGGGGAGCACAAAGTGGCGTTGGAATTCTCCAACCAAGCTCAGAGATTAACATTCACATCTATAGCACACAGCAGTGAAATAGATTACATCGCAGAAGGTAACAGTGTGTATGTGTCATTGGCTAACCTGGACAAATTAAAAGAACAATGCTTAGAAGAATGGGCCATTTATATGGGAATGACCAACGGGCAAGTACCACACATAGATGATGTTTTATCCAAGTTGTCAAATTGGGTGCCGCTAAGTGAATTTTTAAGTGAACACGGCGGTGAAGTGAACCCAAACCATGTGTTT…	845	14659	KP455654.1 Bell pepper endornavirus isolate Maor, complete genome
TRINITY_DN865_c1_g1_i1	KX525267.1	99.645	845	3	0	1	845	12353	13197	0	1510	KX525267.1	1674	842	842	0	99.64	1	1	AATTTGGGTGCAGAAAAATGTTTGGGATTAGGTTTTGAATTAACAAGTGAATTATGGAACAAGATAACAGCTAGAGTTACACCATTGCGCCACATGATTCACAAAGGGGAGCACAAAGTGGCGTTGGAATTCTCCAACCAAGCTCAGAGATTAACATTCACATCTATAGCACACAGCAGTGAAATAGATTACATCGCAGAAGGTAACAGTGTGTATGTGTCATTGGCTAACCTGGACAAATTAAAAGAACAATGCTTAGAAGAATGGGCCATTTATATGGGAATGACCAACGGGCAAGTACCACACATAGATGATGTTTTATCCAAGTTGTCAAATTGGGTGCCGCTAAGTGAATTTTTAAGTGAACACGGCGGTGAAGTGAACCCAAACCATGTGTTT…	AAATTGGGTGCAGAAAAATGTTTGGGATTAGGTTTTGAATTAACAAGTGAATTATGGAACAAGATAACAGCTAGAGTTACACCATTGCGCCACATGATTCACAAAGGGGAGCACAAAGTGGCGTTGGAATTCTCCAACCAAGCTCAGAGATTAACATTCACATCTATAGCACACAGCAGTGAAATAGATTACATCGCAGAAGGTAACAGTGTGTATGTGTCATTGGCTAACCTGGACAAATTAAAAGAACAATGCTTAGAAGAATGGGCCATTTATATGGGAATGACCAACGGGCAAGTACCACACATAGATGATGTTTTATCCAAGTTGTCAAATTGGGTGCCGCTAAGTGAATTTTTAAGTGAACACGGCGGTGAAGTGAACCCAAACCATGTGTTT…	845	14790	KX525267.1 Bell pepper endornavirus isolate DR Polyprotein gene, complete cds
TRINITY_DN865_c1_g1_i1	KT149366.1	99.527	845	4	0	1	845	12349	13193	0	1507	KT149366.1	1670	841	841	0	99.53	1	1	AATTTGGGTGCAGAAAAATGTTTGGGATTAGGTTTTGAATTAACAAGTGAATTATGGAACAAGATAACAGCTAGAGTTACACCATTGCGCCACATGATTCACAAAGGGGAGCACAAAGTGGCGTTGGAATTCTCCAACCAAGCTCAGAGATTAACATTCACATCTATAGCACACAGCAGTGAAATAGATTACATCGCAGAAGGTAACAGTGTGTATGTGTCATTGGCTAACCTGGACAAATTAAAAGAACAATGCTTAGAAGAATGGGCCATTTATATGGGAATGACCAACGGGCAAGTACCACACATAGATGATGTTTTATCCAAGTTGTCAAATTGGGTGCCGCTAAGTGAATTTTTAAGTGAACACGGCGGTGAAGTGAACCCAAACCATGTGTTT…	AAATTGGGTGCAGAAAAATGTTTGGGATTAGGTTTTGAATTAACAAGTGAATTATGGAACAAGATAACAGCTAGAGTTACACCATTGCGCCACATGATTCACAAAGGGGAGCACAAAGTGGCGTTGGAATTTTCCAACCAAGCTCAGAGATTAACATTCACATCTATAGCACACAGCAGTGAAATAGATTACATCGCAGAAGGTAACAGTGTGTATGTGTCATTGGCTAACCTGGACAAATTAAAAGAACAATGCTTAGAAGAATGGGCCATTTATATGGGAATGACCAACGGGCAAGTACCACACATAGATGATGTTTTATCCAAGTTGTCAAATTGGGTGCCGCTAAGTGAATTTTTAAGTGAACACGGCGGTGAAGTGAACCCAAACCATGTGTTT…	845	14726	KT149366.1 Bell pepper endornavirus, complete genome
TRINITY_DN865_c1_g1_i1	JQ951943.1	99.408	845	5	0	1	845	12349	13193	0	1501	JQ951943.1	1664	840	840	0	99.41	1	1	AATTTGGGTGCAGAAAAATGTTTGGGATTAGGTTTTGAATTAACAAGTGAATTATGGAACAAGATAACAGCTAGAGTTACACCATTGCGCCACATGATTCACAAAGGGGAGCACAAAGTGGCGTTGGAATTCTCCAACCAAGCTCAGAGATTAACATTCACATCTATAGCACACAGCAGTGAAATAGATTACATCGCAGAAGGTAACAGTGTGTATGTGTCATTGGCTAACCTGGACAAATTAAAAGAACAATGCTTAGAAGAATGGGCCATTTATATGGGAATGACCAACGGGCAAGTACCACACATAGATGATGTTTTATCCAAGTTGTCAAATTGGGTGCCGCTAAGTGAATTTTTAAGTGAACACGGCGGTGAAGTGAACCCAAACCATGTGTTT…	AAATTGGGTGCAGAGAAATGTTTGGGATTAGGTTTTGAATTAACAAGTGAATTATGGAACAAGATAACAGCTAGAGTTACACCATTGCGCCACATGATTCACAAAGGGGAGCACAAAGTGGCGTTGGAATTCTCCAACCAAGCTCAGAGATTAACATTCACATCTATAGCACACAGCAGCGAAATAGATTACATCGCAGAAGGTAACAGTGTGTATGTGTCATTGGCTAACCTGGACAAATTAAAAGAACAATGCTTAGAAGAATGGGCCATTTATATGGGAATGACCAACGGGCAAGTACCACACATAGATGATGTTTTATCCAAGTTGTCAAATTGGGTGCCGCTAAGTGAATTTTTAAGTGAACACGGCGGTGAAGTGAACCCAAACCATGTGTTT…	845	14727	JQ951943.1 Bell pepper endornavirus strain IS RNA-dependent RNA polymerase (RdRp) gene, complete cds
TRINITY_DN865_c1_g1_i1	AB597230.1	99.172	845	7	0	1	845	12349	13193	0	1492	AB597230.1	1654	838	838	0	99.17	1	1	AATTTGGGTGCAGAAAAATGTTTGGGATTAGGTTTTGAATTAACAAGTGAATTATGGAACAAGATAACAGCTAGAGTTACACCATTGCGCCACATGATTCACAAAGGGGAGCACAAAGTGGCGTTGGAATTCTCCAACCAAGCTCAGAGATTAACATTCACATCTATAGCACACAGCAGTGAAATAGATTACATCGCAGAAGGTAACAGTGTGTATGTGTCATTGGCTAACCTGGACAAATTAAAAGAACAATGCTTAGAAGAATGGGCCATTTATATGGGAATGACCAACGGGCAAGTACCACACATAGATGATGTTTTATCCAAGTTGTCAAATTGGGTGCCGCTAAGTGAATTTTTAAGTGAACACGGCGGTGAAGTGAACCCAAACCATGTGTTT…	AAATTAGGTGCAGAGAAATGTTTGGGATTAGGTTTTGAATTAACAAGTGAATTATGGAACAAGATAACAGCTAGAGTTACACCATTGCGCCACATGATTCACAAAGGGGAGCACAAAGTGGCGTTGGAATTCTCCAACCAAGCTCAGAGATTAACATTCACATCTATAGCACACAGCAGCGAAATAGATTACATCGCAGAAGGTAACAGTGTGTATGTGTCATTGGCTAACCTGGACAAATTAAAAGAACAATGCTTAGAAGAATGGGCCATTTATATGGGAATGACCAACGGGCAAGTACCACACATAGATGATGTTTTATCCAAGTTGTCAAATTGGGTGCCGCTAAGTGAATTTTTAAGTGAACACGGCGGTGAAGTGAACCCAAACCATGTGTTT…	845	14727	AB597230.1 Bell pepper endornavirus genomic RNA, complete genome, host: Capsicum annuum cv. Kyosuzu
TRINITY_DN865_c1_g1_i1	KX977568.1	98.698	845	11	0	1	845	12359	13203	0	1474	KX977568.1	1634	834	834	0	98.7	1	1	AATTTGGGTGCAGAAAAATGTTTGGGATTAGGTTTTGAATTAACAAGTGAATTATGGAACAAGATAACAGCTAGAGTTACACCATTGCGCCACATGATTCACAAAGGGGAGCACAAAGTGGCGTTGGAATTCTCCAACCAAGCTCAGAGATTAACATTCACATCTATAGCACACAGCAGTGAAATAGATTACATCGCAGAAGGTAACAGTGTGTATGTGTCATTGGCTAACCTGGACAAATTAAAAGAACAATGCTTAGAAGAATGGGCCATTTATATGGGAATGACCAACGGGCAAGTACCACACATAGATGATGTTTTATCCAAGTTGTCAAATTGGGTGCCGCTAAGTGAATTTTTAAGTGAACACGGCGGTGAAGTGAACCCAAACCATGTGTTT…	AAATTGGGTGCAGAGAAATGTTTGGGATTAGGTTTTGAATTAACAAGTGAATTATGGAACAAAATAACAGCTAGAGTTACACCATTGCGCCACATGATTCACAAAGGGGAGCACAAAGTGGCATTGGAATTCTCCAACCAAGCTCAGAGATTAACATTTACATCTATAGCACACAGCAGCGAAATAGATTACATCGCAGAAGGTAACAGTGTGTATGTGTCATTGGCTAACCTGGACAAATTAAAAGAACAATGCTTAGAAGAATGGGCCATTTATATGGGAATGACCAACGGGCAAGTACCACACATAGATGATGTCTTATCCAAGTTGTCAAATTGGGTGCCGCTAAGTGAATTTTTAAGTGAACACGGCGGTGAAGTGAACCCAAACCATGTGTTT…	845	14727	KX977568.1 Bell pepper endornavirus isolate Santa Fe, complete genome
TRINITY_DN865_c1_g1_i1	KX977569.1	98.698	845	11	0	1	845	12350	13194	0	1474	KX977569.1	1634	834	834	0	98.7	1	1	AATTTGGGTGCAGAAAAATGTTTGGGATTAGGTTTTGAATTAACAAGTGAATTATGGAACAAGATAACAGCTAGAGTTACACCATTGCGCCACATGATTCACAAAGGGGAGCACAAAGTGGCGTTGGAATTCTCCAACCAAGCTCAGAGATTAACATTCACATCTATAGCACACAGCAGTGAAATAGATTACATCGCAGAAGGTAACAGTGTGTATGTGTCATTGGCTAACCTGGACAAATTAAAAGAACAATGCTTAGAAGAATGGGCCATTTATATGGGAATGACCAACGGGCAAGTACCACACATAGATGATGTTTTATCCAAGTTGTCAAATTGGGTGCCGCTAAGTGAATTTTTAAGTGAACACGGCGGTGAAGTGAACCCAAACCATGTGTTT…	AAATTGGGTGCAGAGAAATGTTTGGGATTAGGTTTTGAATTAACAAGTGAATTATGGAACAAAATAACAGCTAGAGTTACACCATTGCGCCACATGATTCACAAAGGGGAGCACAAAGTGGCATTGGAATTCTCCAACCAAGCTCAGAGATTAACATTTACATCTATAGCACACAGCAGCGAAATAGATTACATCGCAGAAGGTAACAGTGTGTATGTGTCATTGGCTAACCTGGACAAATTAAAAGAACAATGCTTAGAAGAATGGGCCATTTATATGGGAATGACCAACGGGCAAGTACCACACATAGATGATGTCTTATCCAAGTTGTCAAATTGGGTGCCGCTAAGTGAATTTTTAAGTGAACACGGCGGTGAAGTGAACCCAAACCATGTGTTT…	845	14714	KX977569.1 Bell pepper endornavirus isolate Penol, complete genome
TRINITY_DN865_c1_g1_i1	NC_015781.2	86.483	836	113	0	1	836	12350	13185	0	998	NC_015781.2	1106	723	723	0	86.48	1	1	AATTTGGGTGCAGAAAAATGTTTGGGATTAGGTTTTGAATTAACAAGTGAATTATGGAACAAGATAACAGCTAGAGTTACACCATTGCGCCACATGATTCACAAAGGGGAGCACAAAGTGGCGTTGGAATTCTCCAACCAAGCTCAGAGATTAACATTCACATCTATAGCACACAGCAGTGAAATAGATTACATCGCAGAAGGTAACAGTGTGTATGTGTCATTGGCTAACCTGGACAAATTAAAAGAACAATGCTTAGAAGAATGGGCCATTTATATGGGAATGACCAACGGGCAAGTACCACACATAGATGATGTTTTATCCAAGTTGTCAAATTGGGTGCCGCTAAGTGAATTTTTAAGTGAACACGGCGGTGAAGTGAACCCAAACCATGTGTTT…	AAATTGGGTGCTGAGAAGTGCTTGGGATTGGGATTTGAATTGACAAGCGACTTATGGAATAAAATAACAGCCAGGGTCACACCATTGCGTCACATGATTCACAAAGGGGAGCACAAAGTGGCATTAGAATTCTCAAACCAAGCCCAGAGGTTGACATTTACATCCATAGCCCATAGCAGTGAAATAGATTACATTGCAGAAGGAAACAGTGTTTATGTGTCATTGACTAATTTGGATAAAATAAAAGAACAATGCCTGGAAGAGTGGGCCATTTATATGGGAATGACCAATGGGCAAGTACCACACATAGACGACGTATTATCAAAGTTATCAAATTGGGTACCACTTAGTGAATTTTTAAATGAACACGGCAGTGAAGTGAACACAAACCACGTGTTT…	845	14728	NC_015781.2 Bell pepper endornavirus, complete genome
TRINITY_DN865_c1_g1_i1	NC_027920.1	70.392	841	227	8	5	834	12354	13183	8.65e-104	378	NC_027920.1	418	592	592	22	70.39	1	1	TGGGTGCAGAAAAATGTTTGGGATTAGGTTTTGAATTAACAAGTGAATTATGGAACAAGATAACAGCTAGAGTTACACCATTGCGCCACATGATTCACAAAGGGGAGCACAAAGTGGCGTTGGAATTCTCCAACCAAGCTCAGAGATTAACATTCACATCTATAGCACACAGCAGTGAAATAGATTACATCGCAGAAGGTAACAGTGTGTATGTGTCATTGGCTAACCTGGACAA--ATTAAAAGAACAATGCTTAGAAGAATGGGCCATTTATATGGGAATGACCAACGGGC----AAGTACCACACATAGATGATGTTTTATCCAAGTTGTCAAATTGGGTGCCGCTAAGTGAATTTTTAAGTGAACACGGCGGTGAAGTGAACCCAAACCATGTGT…	TGGGTCCAGAAAAAACCATTGGATCAGGTTTTGAAATGACTGCAGAACTATGGAACAAAATCACAAATAGGGAGATGCCATTGCGCCATATGATTCATAAAGGAAAGCACAAAGTGGCATTGGAGTTCTCAAACCAAGCACAAAGATTGACATTCACGGCAGTAGCAAATAGCAGTGAACTGAGCTATGTTGTGGAAGGAAACTGCGTGTACATTGCAATG-CACACATTG-CAACCAATCAAACAACAATGCTTGGAAGAGTGGGCCACATACATGGG--TG--CAAGTGGTGGAAAAGTCCCTCATGTAGACGATGTGCTGACCAAGTATTCCCAGTGGACAACACTTGACAAGTTTTTGCAAGAGCACGGAAATGATGTAAATCCTAAACACGTAT…	845	14729	NC_027920.1 Hot pepper endornavirus isolate CS, complete genome
TRINITY_DN874_c0_g1_i1	JQ951943.1	99.851	672	1	0	1	672	3096	3767	0	1207	JQ951943.1	1338	671	671	0	99.85	1	1	AAAATATTTTCCAATGGGCATGCATCAACACCACCCTGATTTGTTGGTTGCAATACACACACAGTCTGTGGGTGGAGAAGGACTTTGCGCATTCTACGCGTTAGAACATGCATGTGGAATAAAATTGTCTTTGGACCACATGCAATCAGCTTTGAATTGCAAACAACAGTTCTCCACTCTGCAAATAATCAAGTACGGGAATATGTTAGGATATAACGTTGCAGTGTTAACGGAGGAAACTATAATAACCGGTAAAGTTGACCCTACCACTGACCATTTTGTTTGTATACTCCATACAATTGAAGCAGAGACAGGCGCACCCCACTGGCAACCATGTAATGTGGTACAGACTGCGGACCTGGAGAGCACCCCTTGCTACAAAGGTTTGTTCACACAATC…	AAAATATTTTCCAATGGGCATGCATCAACACCACCCTGATTTGTTGGTTGCAATACACACACAGTCTGTGGGTGGAGAAGGACTTTGCGCATTCTACGCGTTAGAACATGCATGTGGAATAAAATTGTCTTTGGACCACATGCAATCAGCTTTGAATTGCAAACAACAGTTCTCCACTCTGCAAATAATCAAGTACGGGAATATGTTAGGATATAACGTTGCAGTGTTAACGGAGGAAACTATAATAACCGGTAAAGTTGACCCTACCACTGACCATTTTGTTTGTATACTCCATACAATTGAAGCAGAGACAGGCGCACCCCACTGGCAACCATGTAATGTGGTACAGACTGCGGACCTGGAGAGCACCCCTTGCTACAAAGGTTTGTTCACACAATC…	672	14727	JQ951943.1 Bell pepper endornavirus strain IS RNA-dependent RNA polymerase (RdRp) gene, complete cds
TRINITY_DN874_c0_g1_i1	KP455654.1	99.851	672	1	0	1	672	3036	3707	0	1207	KP455654.1	1338	671	671	0	99.85	1	1	AAAATATTTTCCAATGGGCATGCATCAACACCACCCTGATTTGTTGGTTGCAATACACACACAGTCTGTGGGTGGAGAAGGACTTTGCGCATTCTACGCGTTAGAACATGCATGTGGAATAAAATTGTCTTTGGACCACATGCAATCAGCTTTGAATTGCAAACAACAGTTCTCCACTCTGCAAATAATCAAGTACGGGAATATGTTAGGATATAACGTTGCAGTGTTAACGGAGGAAACTATAATAACCGGTAAAGTTGACCCTACCACTGACCATTTTGTTTGTATACTCCATACAATTGAAGCAGAGACAGGCGCACCCCACTGGCAACCATGTAATGTGGTACAGACTGCGGACCTGGAGAGCACCCCTTGCTACAAAGGTTTGTTCACACAATC…	AAAATATTTTCCAATGGGCATGCATCAACACCACCCTGATTTGTTGGTTGCAATACACACACAGTCTGTGGGTGGAGAAGGACTTTGCGCATTCTACGCGTTAGAACATGCATGTGGAATAAAATTGTCTTTGGACCACATGCAATCAGCTTTGAATTGCAAACAACAGTTCTCCACTCTGCAAATAATCAAGTACGGGAATATGTTAGGATATAACGTTGCAGTGTTAACGGAGGAAACTATAATAACCGGTAAAGTTGACCCTACCACTGACCATTTTGTTTGTATACTCCATACAATTGAAGCAGAGACAGGCGCACCCCACTGGCAACCATGTAATGTGGTACAGACTGCGGACCTGGAGAGCACCCCTTGCTACAAAGGTTTGTTCACACAATC…	672	14659	KP455654.1 Bell pepper endornavirus isolate Maor, complete genome
TRINITY_DN874_c0_g1_i1	KX525267.1	99.851	672	1	0	1	672	3100	3771	0	1207	KX525267.1	1338	671	671	0	99.85	1	1	AAAATATTTTCCAATGGGCATGCATCAACACCACCCTGATTTGTTGGTTGCAATACACACACAGTCTGTGGGTGGAGAAGGACTTTGCGCATTCTACGCGTTAGAACATGCATGTGGAATAAAATTGTCTTTGGACCACATGCAATCAGCTTTGAATTGCAAACAACAGTTCTCCACTCTGCAAATAATCAAGTACGGGAATATGTTAGGATATAACGTTGCAGTGTTAACGGAGGAAACTATAATAACCGGTAAAGTTGACCCTACCACTGACCATTTTGTTTGTATACTCCATACAATTGAAGCAGAGACAGGCGCACCCCACTGGCAACCATGTAATGTGGTACAGACTGCGGACCTGGAGAGCACCCCTTGCTACAAAGGTTTGTTCACACAATC…	AAAATATTTTCCAATGGGCATGCATCAACACCACCCTGATTTGTTGGTTGCAATACACACACAGTCTGTGGGTGGAGAAGGACTTTGCGCATTCTACGCGTTAGAACATGCATGTGGAATAAAATTGTCTTTGGACCACATGCAATCAGCTTTGAATTGCAAACAACAGTTCTCCACTCTGCAAATAATCAAGTACGGGAATATGTTAGGATATAACGTTGCAGTGTTAACGGAGGAAACTATAATAACCGGTAAAGTTGACCCTACCACTGACCATTTTGTTTGTATACTCCATACAATTGAAGCAGAGACAGGCGCACCCCACTGGCAACCATGTAATGTGGTACAGACTGCGGACCTGGAGAGCACCCCTTGCTACAAAGGTTTGTTCACACAATC…	672	14790	KX525267.1 Bell pepper endornavirus isolate DR Polyprotein gene, complete cds
TRINITY_DN874_c0_g1_i1	AB597230.1	99.702	672	2	0	1	672	3096	3767	0	1204	AB597230.1	1334	670	670	0	99.7	1	1	AAAATATTTTCCAATGGGCATGCATCAACACCACCCTGATTTGTTGGTTGCAATACACACACAGTCTGTGGGTGGAGAAGGACTTTGCGCATTCTACGCGTTAGAACATGCATGTGGAATAAAATTGTCTTTGGACCACATGCAATCAGCTTTGAATTGCAAACAACAGTTCTCCACTCTGCAAATAATCAAGTACGGGAATATGTTAGGATATAACGTTGCAGTGTTAACGGAGGAAACTATAATAACCGGTAAAGTTGACCCTACCACTGACCATTTTGTTTGTATACTCCATACAATTGAAGCAGAGACAGGCGCACCCCACTGGCAACCATGTAATGTGGTACAGACTGCGGACCTGGAGAGCACCCCTTGCTACAAAGGTTTGTTCACACAATC…	AAAATATTTTCCAATGGGCATGCATCAACACCACCCTGATTTGTTGGTTGCAATACACACACAGTCTGTGGGTGGAGAAGGACTTTGCGCATTCTACGCGTTAGAACATGCATGTGGAATAAAATTGTCTTTGGACCACATGCAATCAGCTTTGAATTGCAAACAACAGTTCTCCACTCTGCAAATAATCAAGTACGGGAATATGTTAGGATATAACGTTGCAGTGTTAACGGAGGAAACTATAATAACCGGTAAAGTTGACCCTACCACTGACCATTTTGTTTGTATACTCCATACAATTGAAGCAGAGACAGGCGCACCCCACTGGCAACCATGTAATGTGGTACAGACTGCGGACCTGGAGAGCACCCCTTGCTACAAAGGTTTGTTCACACAATC…	672	14727	AB597230.1 Bell pepper endornavirus genomic RNA, complete genome, host: Capsicum annuum cv. Kyosuzu
TRINITY_DN874_c0_g1_i1	KT149366.1	99.554	672	3	0	1	672	3096	3767	0	1198	KT149366.1	1328	669	669	0	99.55	1	1	AAAATATTTTCCAATGGGCATGCATCAACACCACCCTGATTTGTTGGTTGCAATACACACACAGTCTGTGGGTGGAGAAGGACTTTGCGCATTCTACGCGTTAGAACATGCATGTGGAATAAAATTGTCTTTGGACCACATGCAATCAGCTTTGAATTGCAAACAACAGTTCTCCACTCTGCAAATAATCAAGTACGGGAATATGTTAGGATATAACGTTGCAGTGTTAACGGAGGAAACTATAATAACCGGTAAAGTTGACCCTACCACTGACCATTTTGTTTGTATACTCCATACAATTGAAGCAGAGACAGGCGCACCCCACTGGCAACCATGTAATGTGGTACAGACTGCGGACCTGGAGAGCACCCCTTGCTACAAAGGTTTGTTCACACAATC…	AAAATATTTTCCAATGGGCATGCATCAACACCACCCTGATTTGTTGGTTGCAATACACACACAGTCTGTGGGTGGAGAAGGACTTTGCGCATTCTACGCGTTAGAACATGCATGTGGAATAAAATTGTCTTTGGACCACATGCAATCAGCTTTGAATTGCAAACAACAGTTCTCCACTCTGCAAATAATCAAGTACGGGAATATGTTAGGATATAACGTTGCAGTGTTAACGGAGGAAACTATAATAACCGGTAAAGTCGACCCTACCACTGACCATTTTGTTTGTATACTCCATACAATTGAAGCAGAGACAGGCGCACCCCACTGGCAACCATGTAATGTGGTACAGACTGCGGACCTGGAGAGCACCCCTTGCTACAAAGGTTTGTTCACCCAATC…	672	14726	KT149366.1 Bell pepper endornavirus, complete genome
TRINITY_DN874_c0_g1_i1	KX977568.1	99.256	672	5	0	1	672	3103	3774	0	1189	KX977568.1	1318	667	667	0	99.26	1	1	AAAATATTTTCCAATGGGCATGCATCAACACCACCCTGATTTGTTGGTTGCAATACACACACAGTCTGTGGGTGGAGAAGGACTTTGCGCATTCTACGCGTTAGAACATGCATGTGGAATAAAATTGTCTTTGGACCACATGCAATCAGCTTTGAATTGCAAACAACAGTTCTCCACTCTGCAAATAATCAAGTACGGGAATATGTTAGGATATAACGTTGCAGTGTTAACGGAGGAAACTATAATAACCGGTAAAGTTGACCCTACCACTGACCATTTTGTTTGTATACTCCATACAATTGAAGCAGAGACAGGCGCACCCCACTGGCAACCATGTAATGTGGTACAGACTGCGGACCTGGAGAGCACCCCTTGCTACAAAGGTTTGTTCACACAATC…	AAAATATTTTCCAATGGGCATGCATCAACACCACCCTGATTTGTTGGTTGCAATACACACACAGTCTGTGGGTGGAGAAGGACTTTGCGCATTCTACGCGTTAGAACATGCATGTGGAATAAAACTGTCTTTGGACCACATGCAATCAGCTTTGAATTGCAAACAACAGTTCTCCACTTTGCAAATAATCAAGTACGGGAATATGTTAGGATATAACGTTGCAGTGTTAACGGAGGAAACTATAATAACCGGTAAAGTTGACCCTACCACTGACCATTTTGTTTGTATACTCCATACAATTGAAGCAGAGACAGGCGCACCCCACTGGCAACCATGTAATGTGGTACAGACTGCGGACCTGGAGAGCACCCCTTGCTACAAAGGTTTGTTCACACAATC…	672	14727	KX977568.1 Bell pepper endornavirus isolate Santa Fe, complete genome
TRINITY_DN874_c0_g1_i1	KX977569.1	99.256	672	5	0	1	672	3097	3768	0	1189	KX977569.1	1318	667	667	0	99.26	1	1	AAAATATTTTCCAATGGGCATGCATCAACACCACCCTGATTTGTTGGTTGCAATACACACACAGTCTGTGGGTGGAGAAGGACTTTGCGCATTCTACGCGTTAGAACATGCATGTGGAATAAAATTGTCTTTGGACCACATGCAATCAGCTTTGAATTGCAAACAACAGTTCTCCACTCTGCAAATAATCAAGTACGGGAATATGTTAGGATATAACGTTGCAGTGTTAACGGAGGAAACTATAATAACCGGTAAAGTTGACCCTACCACTGACCATTTTGTTTGTATACTCCATACAATTGAAGCAGAGACAGGCGCACCCCACTGGCAACCATGTAATGTGGTACAGACTGCGGACCTGGAGAGCACCCCTTGCTACAAAGGTTTGTTCACACAATC…	AAAATATTTTCCAATGGGCATGCATCAACACCACCCTGATTTGTTGGTTGCAATACACACACAGTCTGTGGGTGGAGAAGGACTTTGCGCATTCTACGCGTTAGAACATGCATGTGGAATAAAACTGTCTTTGGACCACATGCAATCAGCTTTGAATTGCAAACAACAGTTCTCCACTTTGCAAATAATCAAGTACGGGAATATGTTAGGATATAACGTTGCAGTGTTAACGGAGGAAACTATAATAACCGGTAAAGTTGACCCTACCACTGACCATTTTGTTTGTATACTCCATACAATTGAAGCAGAGACAGGCGCACCCCACTGGCAACCATGTAATGTGGTACAGACTGCGGACCTGGAGAGCACCCCTTGCTACAAAGGTTTGTTCACACAATC…	672	14714	KX977569.1 Bell pepper endornavirus isolate Penol, complete genome
TRINITY_DN874_c0_g1_i1	NC_015781.2	86.012	672	94	0	1	672	3097	3768	0	789	NC_015781.2	874	578	578	0	86.01	1	1	AAAATATTTTCCAATGGGCATGCATCAACACCACCCTGATTTGTTGGTTGCAATACACACACAGTCTGTGGGTGGAGAAGGACTTTGCGCATTCTACGCGTTAGAACATGCATGTGGAATAAAATTGTCTTTGGACCACATGCAATCAGCTTTGAATTGCAAACAACAGTTCTCCACTCTGCAAATAATCAAGTACGGGAATATGTTAGGATATAACGTTGCAGTGTTAACGGAGGAAACTATAATAACCGGTAAAGTTGACCCTACCACTGACCATTTTGTTTGTATACTCCATACAATTGAAGCAGAGACAGGCGCACCCCACTGGCAACCATGTAATGTGGTACAGACTGCGGACCTGGAGAGCACCCCTTGCTACAAAGGTTTGTTCACACAATC…	AAAATATTTCCCGATGGGCATGCACCAACATCACCCTGATTTGTTGACTGCAATACACACACAATCTGTGGGTGGAGAAGGGCTTTGTGCATTTTATGCTTTAGAGCATGCATGTGGAATAAAACTGTCTTTGGAGCATATGCAATCAGCTTTGAATTGCAAGCAACAATTTTCCGCTTTGCAAATAATAAAGTATGGTAATATGTTAGGGTATAATGTTACAGTGTTGACAGAGGAGACCATAATAACAGGCAAAGTTGACCCAACCACTGAACATTTTGTTTGCATACTACACACAATTGAAGCAGAAACAGGGGCACCCCATTGGCAGCCATGCAACGTAGTGCAAACGGCAGATCTAGAGAGCACTCCATGCTACAAGGGTTTATTCATGCAATC…	672	14728	NC_015781.2 Bell pepper endornavirus, complete genome
TRINITY_DN874_c0_g1_i1	NC_027920.1	75.43	639	155	2	1	638	3097	3734	8.3e-122	437	NC_027920.1	484	482	482	2	75.43	1	1	AAAATATTTTCCAATGGGCATGCATCAACACCACCCTGATTTGTTGGTTGCAATACACACACAGTCTGTGGGTGGAGAAGGACTTTGCGCATTCTACGCGTTAGAACATGCATGTGGAATAAAATTGTCTTTGGACCACATGCAATCAGCTTTGAATTGCAAACAACAGTTCTCCACTCTGCAAATAATCAAGTACGGGAATATGTTAGGATATAACGTTGCAGTGTTAACGGAGGAAACTATAATAACCGGTAAAGTTGACCCTACCACTGACCATTTTGTTTGTATACTCCATACAATTGAAGCAGAGACAGGCGCACCCCACTGGCAACCATGTAATGTGGTACAGACTGCGGACCTGGAGAGCACCCCTTGCTACAAAGGTTTGTTCACACAATC…	AAAGTACTTTCCAATGGGTATGCAGCAACACCACCCTGATTTGTTGACACCAATAAACACACAGTCAGTCGGTGGGGATGGGTTGTGTGCATATTATGCACTAGAACATGGCTGTGGAATTAAATTGTCATTGGAACACATGCAATCAGCCTTGAACTGCAAGCAACAATTTTCAACATTGCAAATAATAAAGTACGGTAACATGTTAGGTTACAATGTGGCAGTATTAACAGAAGAAGCCATAATAACGGGTAAAGTGGACCCAACCACAGATAATTTTGTGTGCATACTTCACACTTTTGAAGCTGAGACTGGAGCACCACATTGGCAACCTTGCAACGTTGTACAAACCGGGGATTTGGAAAGTACACCGTGTTACAAAGGAATGTTCAAACAATC…	672	14729	NC_027920.1 Hot pepper endornavirus isolate CS, complete genome
TRINITY_DN874_c1_g1_i1	KT149366.1	99.565	460	2	0	1	460	3855	4314	0	821	KT149366.1	910	458	458	0	99.57	1	1	GTCCCTATTGCGCAATACAGTTTTGCAATTACGACAAACATGGCTGCAAGCAAAAGGAATTGAACCAAGGTCAGAAGATGCATGGGTAAAGGTGTTCGCGCTAACACATAAGATTGGCCGGGATACTAGATTGCTAATGTTACAACATACCAAAGTCAAGTCAGGAGATGTGATTTCAGTAGACACCATGTTTGGTATTCAAGATCGTGTAATATGGAAGTTCAATGACGGATTTCAATGCCAAGATTGGTTGCCTCCTACTATTGGAACACAAACCATAAAAATTTACATTAACAAAAGGAGTTTCAAAAGTGGATTAATCAAACTAATGACGTTGAGCAGACCTCACGTAGATTTCACACAATTTAAACAGTTGGTACTAACATCCACATGTGTGAT…	GTCCCTATTGCGCAACACAGTTTTGCAGTTACGACAAACATGGCTGCAAGCAAAAGGAATTGAACCAAGGTCAGAAGATGCATGGGTAAAGGTGTTCGCGCTAACACATAAGATTGGCCGGGATACTAGATTGCTAATGTTACAACATACCAAAGTCAAGTCAGGAGATGTGATTTCAGTAGACACCATGTTTGGTATTCAAGATCGTGTAATATGGAAGTTCAATGACGGATTTCAATGCCAAGATTGGTTGCCTCCTACTATTGGAACACAAACCATAAAAATTTACATTAACAAAAGGAGTTTCAAAAGTGGATTAATCAAACTAATGACGTTGAGCAGACCTCACGTAGATTTCACACAATTTAAACAGTTGGTACTAACATCCACATGTGTGAT…	460	14726	KT149366.1 Bell pepper endornavirus, complete genome
TRINITY_DN874_c1_g1_i1	KP455654.1	99.565	460	2	0	1	460	3795	4254	0	821	KP455654.1	910	458	458	0	99.57	1	1	GTCCCTATTGCGCAATACAGTTTTGCAATTACGACAAACATGGCTGCAAGCAAAAGGAATTGAACCAAGGTCAGAAGATGCATGGGTAAAGGTGTTCGCGCTAACACATAAGATTGGCCGGGATACTAGATTGCTAATGTTACAACATACCAAAGTCAAGTCAGGAGATGTGATTTCAGTAGACACCATGTTTGGTATTCAAGATCGTGTAATATGGAAGTTCAATGACGGATTTCAATGCCAAGATTGGTTGCCTCCTACTATTGGAACACAAACCATAAAAATTTACATTAACAAAAGGAGTTTCAAAAGTGGATTAATCAAACTAATGACGTTGAGCAGACCTCACGTAGATTTCACACAATTTAAACAGTTGGTACTAACATCCACATGTGTGAT…	GTCCCTATTGCGCAACACAGTTTTGCAGTTACGACAAACATGGCTGCAAGCAAAAGGAATTGAACCAAGGTCAGAAGATGCATGGGTAAAGGTGTTCGCGCTAACACATAAGATTGGCCGGGATACTAGATTGCTAATGTTACAACATACCAAAGTCAAGTCAGGAGATGTGATTTCAGTAGACACCATGTTTGGTATTCAAGATCGTGTAATATGGAAGTTCAATGACGGATTTCAATGCCAAGATTGGTTGCCTCCTACTATTGGAACACAAACCATAAAAATTTACATTAACAAAAGGAGTTTCAAAAGTGGATTAATCAAACTAATGACGTTGAGCAGACCTCACGTAGATTTCACACAATTTAAACAGTTGGTACTAACATCCACATGTGTGAT…	460	14659	KP455654.1 Bell pepper endornavirus isolate Maor, complete genome
TRINITY_DN874_c1_g1_i1	KX525267.1	99.565	460	2	0	1	460	3859	4318	0	821	KX525267.1	910	458	458	0	99.57	1	1	GTCCCTATTGCGCAATACAGTTTTGCAATTACGACAAACATGGCTGCAAGCAAAAGGAATTGAACCAAGGTCAGAAGATGCATGGGTAAAGGTGTTCGCGCTAACACATAAGATTGGCCGGGATACTAGATTGCTAATGTTACAACATACCAAAGTCAAGTCAGGAGATGTGATTTCAGTAGACACCATGTTTGGTATTCAAGATCGTGTAATATGGAAGTTCAATGACGGATTTCAATGCCAAGATTGGTTGCCTCCTACTATTGGAACACAAACCATAAAAATTTACATTAACAAAAGGAGTTTCAAAAGTGGATTAATCAAACTAATGACGTTGAGCAGACCTCACGTAGATTTCACACAATTTAAACAGTTGGTACTAACATCCACATGTGTGAT…	GTCCCTATTGCGCAACACAGTTTTGCAGTTACGACAAACATGGCTGCAAGCAAAAGGAATTGAACCAAGGTCAGAAGATGCATGGGTAAAGGTGTTCGCGCTAACACATAAGATTGGCCGGGATACTAGATTGCTAATGTTACAACATACCAAAGTCAAGTCAGGAGATGTGATTTCAGTAGACACCATGTTTGGTATTCAAGATCGTGTAATATGGAAGTTCAATGACGGATTTCAATGCCAAGATTGGTTGCCTCCTACTATTGGAACACAAACCATAAAAATTTACATTAACAAAAGGAGTTTCAAAAGTGGATTAATCAAACTAATGACGTTGAGCAGACCTCACGTAGATTTCACACAATTTAAACAGTTGGTACTAACATCCACATGTGTGAT…	460	14790	KX525267.1 Bell pepper endornavirus isolate DR Polyprotein gene, complete cds
TRINITY_DN874_c1_g1_i1	AB597230.1	99.13	460	4	0	1	460	3855	4314	0	812	AB597230.1	900	456	456	0	99.13	1	1	GTCCCTATTGCGCAATACAGTTTTGCAATTACGACAAACATGGCTGCAAGCAAAAGGAATTGAACCAAGGTCAGAAGATGCATGGGTAAAGGTGTTCGCGCTAACACATAAGATTGGCCGGGATACTAGATTGCTAATGTTACAACATACCAAAGTCAAGTCAGGAGATGTGATTTCAGTAGACACCATGTTTGGTATTCAAGATCGTGTAATATGGAAGTTCAATGACGGATTTCAATGCCAAGATTGGTTGCCTCCTACTATTGGAACACAAACCATAAAAATTTACATTAACAAAAGGAGTTTCAAAAGTGGATTAATCAAACTAATGACGTTGAGCAGACCTCACGTAGATTTCACACAATTTAAACAGTTGGTACTAACATCCACATGTGTGAT…	GTCCCTATTGCGCAACACAGTTTTGCAGTTACGACAAACATGGCTGCAAGCAAAAGGAATTGAACCAAGGTCAGAAGATGCATGGGTAAAGGTGTTCGCGCTAACACATAAAATTGGCCGGGATACTAGATTGCTAATGTTACAACATACCAAAGTCAAGTCAGGAGATGTGATTTCAGTAGACACCATGTTTGGTATTCAAGATCGTGTAATATGGAAGTTCAATGACGGATTTCAATGCCAAGATTGGTTGCCTCCTACTATTGGAACACAAACCATAAAAATTTACATTAACAAAAGGAGTTTCAAAAGTGGATTGATCAAACTAATGACGTTGAGCAGACCTCACGTAGATTTCACACAATTTAAACAGTTGGTACTAACATCCACATGTGTGAT…	460	14727	AB597230.1 Bell pepper endornavirus genomic RNA, complete genome, host: Capsicum annuum cv. Kyosuzu
TRINITY_DN874_c1_g1_i1	JQ951943.1	99.13	460	4	0	1	460	3855	4314	0	812	JQ951943.1	900	456	456	0	99.13	1	1	GTCCCTATTGCGCAATACAGTTTTGCAATTACGACAAACATGGCTGCAAGCAAAAGGAATTGAACCAAGGTCAGAAGATGCATGGGTAAAGGTGTTCGCGCTAACACATAAGATTGGCCGGGATACTAGATTGCTAATGTTACAACATACCAAAGTCAAGTCAGGAGATGTGATTTCAGTAGACACCATGTTTGGTATTCAAGATCGTGTAATATGGAAGTTCAATGACGGATTTCAATGCCAAGATTGGTTGCCTCCTACTATTGGAACACAAACCATAAAAATTTACATTAACAAAAGGAGTTTCAAAAGTGGATTAATCAAACTAATGACGTTGAGCAGACCTCACGTAGATTTCACACAATTTAAACAGTTGGTACTAACATCCACATGTGTGAT…	GTCCCTATTGCGCAACACAGTTTTGCAGTTACGACAAACATGGCTGCAAGCAAAAGGAATTGAACCAAGGTCAGAAGATGCATGGGTAAAGGTGTTCGCGCTAACACATAAGATTGGCCGGGATACTAGATTGCTAATGTTACAACATACCAAAGTCAAGTCAGGAGATGTGATTTCAGTAGACACCATGTTTGGTATTCAAGATCGTGTAATATGGAAGTTCAATGACGGATTTCAATGCCAAGATTGGTTGCCTCCTACTATTGGAACACAAACCATAAAAATTTACATTAACAAAAGGAGTTTCAAAAGTGGATTAATCAAACTAATGACGTTGAGCAGACCTCACGTAGATTTCACACAATTTAATCAGTTGGTACTAACATCCACATGTGTGAT…	460	14727	JQ951943.1 Bell pepper endornavirus strain IS RNA-dependent RNA polymerase (RdRp) gene, complete cds
TRINITY_DN874_c1_g1_i1	KX977568.1	99.13	460	4	0	1	460	3862	4321	0	812	KX977568.1	900	456	456	0	99.13	1	1	GTCCCTATTGCGCAATACAGTTTTGCAATTACGACAAACATGGCTGCAAGCAAAAGGAATTGAACCAAGGTCAGAAGATGCATGGGTAAAGGTGTTCGCGCTAACACATAAGATTGGCCGGGATACTAGATTGCTAATGTTACAACATACCAAAGTCAAGTCAGGAGATGTGATTTCAGTAGACACCATGTTTGGTATTCAAGATCGTGTAATATGGAAGTTCAATGACGGATTTCAATGCCAAGATTGGTTGCCTCCTACTATTGGAACACAAACCATAAAAATTTACATTAACAAAAGGAGTTTCAAAAGTGGATTAATCAAACTAATGACGTTGAGCAGACCTCACGTAGATTTCACACAATTTAAACAGTTGGTACTAACATCCACATGTGTGAT…	GTCCCTATTGCGCAACACAGTTTTGCAGTTACGACAAACATGGCTGCAAGCAAAAGGAATTGAACCAAGGTCAGAAGATGCATGGGTAAAGGTGTTCGCGCTAACACATAAGATTGGCCGGGATACTAGATTGCTAATGTTACAACACACCAAAGTCAAGTCAGGAGATGTGATTTCAGTAGACACCATGTTTGGTATTCAAGATCGTGTAATATGGAAGTTCAATGACGGATTTCAATGCCAAGATTGGTTGCCTCCTACTATTGGAACACAAACCATAAAAATTTACATTAACAAAAGGAGTTTCAAAAGTGGATTAATCAAACTAATGACGTTGAGCAGACCTCACGTAGATTTCACACAATTTAAACAGTTGGTGCTAACATCCACATGTGTGAT…	460	14727	KX977568.1 Bell pepper endornavirus isolate Santa Fe, complete genome
TRINITY_DN874_c1_g1_i1	KX977569.1	99.13	460	4	0	1	460	3856	4315	0	812	KX977569.1	900	456	456	0	99.13	1	1	GTCCCTATTGCGCAATACAGTTTTGCAATTACGACAAACATGGCTGCAAGCAAAAGGAATTGAACCAAGGTCAGAAGATGCATGGGTAAAGGTGTTCGCGCTAACACATAAGATTGGCCGGGATACTAGATTGCTAATGTTACAACATACCAAAGTCAAGTCAGGAGATGTGATTTCAGTAGACACCATGTTTGGTATTCAAGATCGTGTAATATGGAAGTTCAATGACGGATTTCAATGCCAAGATTGGTTGCCTCCTACTATTGGAACACAAACCATAAAAATTTACATTAACAAAAGGAGTTTCAAAAGTGGATTAATCAAACTAATGACGTTGAGCAGACCTCACGTAGATTTCACACAATTTAAACAGTTGGTACTAACATCCACATGTGTGAT…	GTCCCTATTGCGCAACACAGTTTTGCAGTTACGACAAACATGGCTGCAAGCAAAAGGAATTGAACCAAGGTCAGAAGATGCATGGGTAAAGGTGTTCGCGCTAACACATAAGATTGGCCGGGATACTAGATTGCTAATGTTACAACACACCAAAGTCAAGTCAGGAGATGTGATTTCAGTAGACACCATGTTTGGTATTCAAGATCGTGTAATATGGAAGTTCAATGACGGATTTCAATGCCAAGATTGGTTGCCTCCTACTATTGGAACACAAACCATAAAAATTTACATTAACAAAAGGAGTTTCAAAAGTGGATTAATCAAACTAATGACGTTGAGCAGACCTCACGTAGATTTCACACAATTTAAACAGTTGGTGCTAACATCCACATGTGTGAT…	460	14714	KX977569.1 Bell pepper endornavirus isolate Penol, complete genome
TRINITY_DN874_c1_g1_i1	NC_015781.2	89.76	459	47	0	2	460	3857	4315	1.01e-175	616	NC_015781.2	682	412	412	0	89.76	1	1	TCCCTATTGCGCAATACAGTTTTGCAATTACGACAAACATGGCTGCAAGCAAAAGGAATTGAACCAAGGTCAGAAGATGCATGGGTAAAGGTGTTCGCGCTAACACATAAGATTGGCCGGGATACTAGATTGCTAATGTTACAACATACCAAAGTCAAGTCAGGAGATGTGATTTCAGTAGACACCATGTTTGGTATTCAAGATCGTGTAATATGGAAGTTCAATGACGGATTTCAATGCCAAGATTGGTTGCCTCCTACTATTGGAACACAAACCATAAAAATTTACATTAACAAAAGGAGTTTCAAAAGTGGATTAATCAAACTAATGACGTTGAGCAGACCTCACGTAGATTTCACACAATTTAAACAGTTGGTACTAACATCCACATGTGTGATA…	TCCCTAATGCGCAACACGATCTTGCAATTGCGACAAACATGGTTGCAAGCAAAAGGAATTGAGCCACGATCAGATGATGCATGGGTAAAGGTGTTTGCGCTAACGCATAAAATTGGCCGGGATACTAGATTACTGATGCTACAACACACAAAAGTTAAGTCAGGGGATGTAATTTCAGTAGACACCATGTTTGGTGTTCAAGACCGTGTAATATGGAAGTTCAATGATGGGTTTCAGTGCCAAGATTGGTTACCACCCACTATTGGAACACAAACCATAAAGATTTACATTAATAAAAGGAGTTTCAAAAGTGGATTAATTAAACTGATGACTTTGAGCAGACCCCATGTAGATTTCACGCAGTTTAAACAGTTGGTACTAACATCCACATGTATAATA…	460	14728	NC_015781.2 Bell pepper endornavirus, complete genome
TRINITY_DN874_c1_g1_i1	NC_027920.1	76.872	454	105	0	6	459	3861	4314	2.71e-94	345	NC_027920.1	382	349	349	0	76.87	1	1	TATTGCGCAATACAGTTTTGCAATTACGACAAACATGGCTGCAAGCAAAAGGAATTGAACCAAGGTCAGAAGATGCATGGGTAAAGGTGTTCGCGCTAACACATAAGATTGGCCGGGATACTAGATTGCTAATGTTACAACATACCAAAGTCAAGTCAGGAGATGTGATTTCAGTAGACACCATGTTTGGTATTCAAGATCGTGTAATATGGAAGTTCAATGACGGATTTCAATGCCAAGATTGGTTGCCTCCTACTATTGGAACACAAACCATAAAAATTTACATTAACAAAAGGAGTTTCAAAAGTGGATTAATCAAACTAATGACGTTGAGCAGACCTCACGTAGATTTCACACAATTTAAACAGTTGGTACTAACATCCACATGTGTGATAGGGC…	TAATGCGCAACACTGTGATTCAGCTTAGGCAAACGTTGATACAGGCAAAGGGTGTGGAACCCAGATCAGAAGATGCTTGGGTAAAAGTGTTTGCACTAACGCACAAAATTGGAAAAGATACAAGATTGCTAATGTTACAAGACACAAAAATAAAATCTGGTGATGTGATTTCAGTAGACACCATGTTTGGAATACAAGACAGAGTAGTGTGGAAATTCAATGATGGATTTCAATGTCTAGATTGGTTGCCACCAACAATTGGAACCCAGACAATAAAAATTTACATCAACAAACGGAGTTTCAAAAGTGGACTAATAAAATTGATGACCCTGAATAGGCCACATGTTAAGTTTGATCAATTTAAAGAGTTAGTAATGTCCTCAAATTGCATAATAGGGC…	460	14729	NC_027920.1 Hot pepper endornavirus isolate CS, complete genome
TRINITY_DN901_c0_g1_i1	NC_001747.1	82.569	109	12	3	518	622	2	107	2.77e-21	104	NC_001747.1	114	90	90	7	82.57	1	1	TTTATGAGACTATGCAGCAATTAGTGAAACCAGATGTACAGACAGCATG----GGATTAGCCGCTTCAATGGGATCTTTGATTCTGGTCGGAGGAGAAATTACCAAACG	TTTATGATACTATGCA--AATT-GTGCTACCAGAAATCCGTACAGTATGCGTAGGATTAGCCGCTTCAATGGGATCTGTTATCCTGGTCGGAGGAGAAATTACCAAACG	825	5987	NC_001747.1 Potato leafroll virus, complete genome
TRINITY_DN901_c0_g1_i1	NC_034265.1	82.569	109	12	3	518	622	2	107	2.77e-21	104	NC_034265.1	114	90	90	7	82.57	1	1	TTTATGAGACTATGCAGCAATTAGTGAAACCAGATGTACAGACAGCATG----GGATTAGCCGCTTCAATGGGATCTTTGATTCTGGTCGGAGGAGAAATTACCAAACG	TTTATGATACTATGCA--AATT-GTGCTACCAGAAATCCGTACAGTATGCGTAGGATTAGCCGCTTCAATGGGATCTGTTATCCTGGTCGGAGGAGAAATTACCAAACG	825	5979	NC_034265.1 Tobacco virus 2, complete genome
TRINITY_DN913_c0_g1_i1	KX525267.1	99.793	484	1	0	1	484	4946	5429	0	868	KX525267.1	962	483	483	0	99.79	1	1	ATATCCGCCTTCACACGAGCAAAACTAAAAGTAGTATGGGTAAGTGTCGAGGTGTCAAACCGAATGACCCTGCTTGACAAGTTGCGTGGCACTGAACTAGACATAATTGGAGGTGGTAAACAACCGGCGGTAACGGAGCATAGCGACACACTTCACCAAACATTGTTGGATACGCTGCAAGGCGGAATTAATGAGGAAGAAACAAAACAACCAGTGTTCCCCCAGCAATCTGAAGAAACAAGCACATCATACCACGAAATGGCTGAAGTTGAACATCAACATATGAGCAAAATATTAAATGAAAAAGTGGTGACAACAGCAGATATAGAAACCATCTTAGATGGTTACAATATGAACAAGCAACCGTTGTTGATTTACAATGGGTGGGCGGATTTTGTT…	ATATCCGCCATCACACGAGCAAAACTAAAAGTAGTATGGGTAAGTGTCGAGGTGTCAAACCGAATGACCCTGCTTGACAAGTTGCGTGGCACTGAACTAGACATAATTGGAGGTGGTAAACAACCGGCGGTAACGGAGCATAGCGACACACTTCACCAAACATTGTTGGATACGCTGCAAGGCGGAATTAATGAGGAAGAAACAAAACAACCAGTGTTCCCCCAGCAATCTGAAGAAACAAGCACATCATACCACGAAATGGCTGAAGTTGAACATCAACATATGAGCAAAATATTAAATGAAAAAGTGGTGACAACAGCAGATATAGAAACCATCTTAGATGGTTACAATATGAACAAGCAACCGTTGTTGATTTACAATGGGTGGGCGGATTTTGTT…	485	14790	KX525267.1 Bell pepper endornavirus isolate DR Polyprotein gene, complete cds
TRINITY_DN913_c0_g1_i1	NC_015781.2	99.38	484	3	0	1	484	4943	5426	0	859	NC_015781.2	952	481	481	0	99.38	1	1	ATATCCGCCTTCACACGAGCAAAACTAAAAGTAGTATGGGTAAGTGTCGAGGTGTCAAACCGAATGACCCTGCTTGACAAGTTGCGTGGCACTGAACTAGACATAATTGGAGGTGGTAAACAACCGGCGGTAACGGAGCATAGCGACACACTTCACCAAACATTGTTGGATACGCTGCAAGGCGGAATTAATGAGGAAGAAACAAAACAACCAGTGTTCCCCCAGCAATCTGAAGAAACAAGCACATCATACCACGAAATGGCTGAAGTTGAACATCAACATATGAGCAAAATATTAAATGAAAAAGTGGTGACAACAGCAGATATAGAAACCATCTTAGATGGTTACAATATGAACAAGCAACCGTTGTTGATTTACAATGGGTGGGCGGATTTTGTT…	ATATCCGCCATCACACGAGCAAAACTAAAAGTAGTATGGGTAAGTGTCGAGGTGTCAAACCGAATGACCCTGCTTGACAAGTTGCGTGGCACTGAACTAGACATAATTGGAGGTGGTAAACAACCGGCGGTAACAGAGCATAGCGACACACTTCACCAAACATTGTTGGATACGCTGCAAGGCGGAATTAATGAGGAAGAAACAAAACAACCAGTGTTCCCCCAACAATCTGAAGAAACAAGCACATCATACCACGAAATGGCTGAAGTTGAACATCAACATATGAGCAAAATATTAAATGAAAAAGTGGTGACAACAGCAGATATAGAAACCATCTTAGATGGTTACAATATGAACAAGCAACCGTTGTTGATTTACAATGGGTGGGCGGATTTTGTT…	485	14728	NC_015781.2 Bell pepper endornavirus, complete genome
TRINITY_DN913_c0_g1_i1	KT149366.1	99.38	484	3	0	1	484	4942	5425	0	859	KT149366.1	952	481	481	0	99.38	1	1	ATATCCGCCTTCACACGAGCAAAACTAAAAGTAGTATGGGTAAGTGTCGAGGTGTCAAACCGAATGACCCTGCTTGACAAGTTGCGTGGCACTGAACTAGACATAATTGGAGGTGGTAAACAACCGGCGGTAACGGAGCATAGCGACACACTTCACCAAACATTGTTGGATACGCTGCAAGGCGGAATTAATGAGGAAGAAACAAAACAACCAGTGTTCCCCCAGCAATCTGAAGAAACAAGCACATCATACCACGAAATGGCTGAAGTTGAACATCAACATATGAGCAAAATATTAAATGAAAAAGTGGTGACAACAGCAGATATAGAAACCATCTTAGATGGTTACAATATGAACAAGCAACCGTTGTTGATTTACAATGGGTGGGCGGATTTTGTT…	ATATCCGCCATCACACGAGCAAAACTAAAAGTAGTATGGGTGAGTGTCGAGGTGTCAAACCGAATGACCCTGCTTGACAAGTTGCGTGGCACTGAACTAGACATAATTGGAGGTGGTAAACAACCGGCGGTAACGGAGCATAGCGACACACTTCACCAAACATTGTTGGATACGCTGCAAGGTGGAATTAATGAGGAAGAAACAAAACAACCAGTGTTCCCCCAGCAATCTGAAGAAACAAGCACATCATACCACGAAATGGCTGAAGTTGAACATCAACATATGAGCAAAATATTAAATGAAAAAGTGGTGACAACAGCAGATATAGAAACCATCTTAGATGGTTACAATATGAACAAGCAACCGTTGTTGATTTACAATGGGTGGGCGGATTTTGTT…	485	14726	KT149366.1 Bell pepper endornavirus, complete genome
TRINITY_DN913_c0_g1_i1	KP455654.1	99.38	484	3	0	1	484	4882	5365	0	859	KP455654.1	952	481	481	0	99.38	1	1	ATATCCGCCTTCACACGAGCAAAACTAAAAGTAGTATGGGTAAGTGTCGAGGTGTCAAACCGAATGACCCTGCTTGACAAGTTGCGTGGCACTGAACTAGACATAATTGGAGGTGGTAAACAACCGGCGGTAACGGAGCATAGCGACACACTTCACCAAACATTGTTGGATACGCTGCAAGGCGGAATTAATGAGGAAGAAACAAAACAACCAGTGTTCCCCCAGCAATCTGAAGAAACAAGCACATCATACCACGAAATGGCTGAAGTTGAACATCAACATATGAGCAAAATATTAAATGAAAAAGTGGTGACAACAGCAGATATAGAAACCATCTTAGATGGTTACAATATGAACAAGCAACCGTTGTTGATTTACAATGGGTGGGCGGATTTTGTT…	ATATCCGCCATCACACGAGCAAAACTAAAAGTAGTATGGGTGAGTGTCGAGGTGTCAAACCGAATGACCCTGCTTGACAAGTTGCGTGGCACTGAACTAGACATAATTGGAGGTGGTAAACAACCGGCGGTAACGGAGCATAGCGACACACTTCACCAAACATTGTTGGATACGCTGCAAGGCGGAATTAATGAGGAAGAAACAAAACAACCAGTGTTCCCCCAGCAATCTGAAGAAACAAGCACATCATACCACGAAATGGCTGAAGTTGAACATCAACATATGAGCAAAATATTAAATGAGAAAGTGGTGACAACAGCAGATATAGAAACCATCTTAGATGGTTACAATATGAACAAGCAACCGTTGTTGATTTACAATGGGTGGGCGGATTTTGTT…	485	14659	KP455654.1 Bell pepper endornavirus isolate Maor, complete genome
TRINITY_DN913_c0_g1_i1	KX977568.1	99.174	484	4	0	1	484	4949	5432	0	856	KX977568.1	948	480	480	0	99.17	1	1	ATATCCGCCTTCACACGAGCAAAACTAAAAGTAGTATGGGTAAGTGTCGAGGTGTCAAACCGAATGACCCTGCTTGACAAGTTGCGTGGCACTGAACTAGACATAATTGGAGGTGGTAAACAACCGGCGGTAACGGAGCATAGCGACACACTTCACCAAACATTGTTGGATACGCTGCAAGGCGGAATTAATGAGGAAGAAACAAAACAACCAGTGTTCCCCCAGCAATCTGAAGAAACAAGCACATCATACCACGAAATGGCTGAAGTTGAACATCAACATATGAGCAAAATATTAAATGAAAAAGTGGTGACAACAGCAGATATAGAAACCATCTTAGATGGTTACAATATGAACAAGCAACCGTTGTTGATTTACAATGGGTGGGCGGATTTTGTT…	ATATCCGCCATCACACGAGCAAAACTAAAAGTAGTATGGGTAAGTGTCGAGGTGTCAAACCGAATGACCCTGCTTGACAAGTTGCGTGGCACTGAACTAGACATAATTGGAGGTGGTAAACAACCGGCGGTAACAGAGCATAGCGACACACTTCACCAAACATTGTTGGATACGCTGCAAGGCGGAATTAATGAGGAAGAAACAAAACAACCAGTGTTCCCCCAACAATCTGAAGAAACAAGCACATCATACCACGAAATGGCTGAAGTTGAACATCAACATATGAGCAAAATATTAAATGAAAAAGTGGTGACAACAGCAGATATAGAAACCATCTTAGATGGTTACAATATGAACAAGCAACCGTTGTTGATTTACAATGGGTGGGCGGATTTTGTT…	485	14727	KX977568.1 Bell pepper endornavirus isolate Santa Fe, complete genome
TRINITY_DN913_c0_g1_i1	KX977569.1	99.174	484	4	0	1	484	4943	5426	0	856	KX977569.1	948	480	480	0	99.17	1	1	ATATCCGCCTTCACACGAGCAAAACTAAAAGTAGTATGGGTAAGTGTCGAGGTGTCAAACCGAATGACCCTGCTTGACAAGTTGCGTGGCACTGAACTAGACATAATTGGAGGTGGTAAACAACCGGCGGTAACGGAGCATAGCGACACACTTCACCAAACATTGTTGGATACGCTGCAAGGCGGAATTAATGAGGAAGAAACAAAACAACCAGTGTTCCCCCAGCAATCTGAAGAAACAAGCACATCATACCACGAAATGGCTGAAGTTGAACATCAACATATGAGCAAAATATTAAATGAAAAAGTGGTGACAACAGCAGATATAGAAACCATCTTAGATGGTTACAATATGAACAAGCAACCGTTGTTGATTTACAATGGGTGGGCGGATTTTGTT…	ATATCCGCCATCACACGAGCAAAACTAAAAGTAGTATGGGTAAGTGTCGAGGTGTCAAACCGAATGACCCTGCTTGACAAGTTGCGTGGCACTGAACTAGACATAATTGGAGGTGGTAAACAACCGGCGGTAACAGAGCATAGCGACACACTTCACCAAACATTGTTGGATACGCTGCAAGGCGGAATTAATGAGGAAGAAACAAAACAACCAGTGTTCCCCCAACAATCTGAAGAAACAAGCACATCATACCACGAAATGGCTGAAGTTGAACATCAACATATGAGCAAAATATTAAATGAAAAAGTGGTGACAACAGCAGATATAGAAACCATCTTAGATGGTTACAATATGAACAAGCAACCGTTGTTGATTTACAATGGGTGGGCGGATTTTGTT…	485	14714	KX977569.1 Bell pepper endornavirus isolate Penol, complete genome
TRINITY_DN913_c0_g1_i1	JQ951943.1	98.758	483	6	0	1	483	4942	5424	0	845	JQ951943.1	936	477	477	0	98.76	1	1	ATATCCGCCTTCACACGAGCAAAACTAAAAGTAGTATGGGTAAGTGTCGAGGTGTCAAACCGAATGACCCTGCTTGACAAGTTGCGTGGCACTGAACTAGACATAATTGGAGGTGGTAAACAACCGGCGGTAACGGAGCATAGCGACACACTTCACCAAACATTGTTGGATACGCTGCAAGGCGGAATTAATGAGGAAGAAACAAAACAACCAGTGTTCCCCCAGCAATCTGAAGAAACAAGCACATCATACCACGAAATGGCTGAAGTTGAACATCAACATATGAGCAAAATATTAAATGAAAAAGTGGTGACAACAGCAGATATAGAAACCATCTTAGATGGTTACAATATGAACAAGCAACCGTTGTTGATTTACAATGGGTGGGCGGATTTTGTT…	ATATCCGCCATCACACGAGCAAAACTAAAAGTAGTATGGGTAAGTGTCGAGGTGTCAAACCGAATGACCCTGCTTGACAAGTTGCGTGGCACTGAACTAGACATAATTGGAGGTGGTAAACAACCGGCGGTAACAGAGCATAGCGACACACTTCACCAAACATTGTTGGATACGCTGCAAGGCGGAATTAATGAGGAAGAAACAAAACAACCAGTGTTCCCCCAGCAATCTGAAGAGACAAGCACATCATACCACGAAATGGCTGAAGTTGAACACCAACATGTGAGCAAAATATTAAATGAAAAAGTGGTGACAACAGCAGATATAGAAACCATCTTAGATGGTTACAATATGAACAAGCAACCGTTGTTGATTTACAATGGGTGGGCGGATTTTGTT…	485	14727	JQ951943.1 Bell pepper endornavirus strain IS RNA-dependent RNA polymerase (RdRp) gene, complete cds
TRINITY_DN913_c0_g1_i1	AB597230.1	98.347	484	8	0	1	484	4942	5425	0	838	AB597230.1	928	476	476	0	98.35	1	1	ATATCCGCCTTCACACGAGCAAAACTAAAAGTAGTATGGGTAAGTGTCGAGGTGTCAAACCGAATGACCCTGCTTGACAAGTTGCGTGGCACTGAACTAGACATAATTGGAGGTGGTAAACAACCGGCGGTAACGGAGCATAGCGACACACTTCACCAAACATTGTTGGATACGCTGCAAGGCGGAATTAATGAGGAAGAAACAAAACAACCAGTGTTCCCCCAGCAATCTGAAGAAACAAGCACATCATACCACGAAATGGCTGAAGTTGAACATCAACATATGAGCAAAATATTAAATGAAAAAGTGGTGACAACAGCAGATATAGAAACCATCTTAGATGGTTACAATATGAACAAGCAACCGTTGTTGATTTACAATGGGTGGGCGGATTTTGTT…	ATATCCGCCATCACACGAGCAAAACTAAAAGTAGTATGGGTAAGTGTCGAGGTGTCAAACCGAATGACCCTGCTTGACAAGTTGCGTGGCACTGAACTAGACATAATTGGAGGTGGTAAACAACCGGCGGTAACAGAGCATAGCGACACACTTCACCAAACATTGTTGGATACGCTGCAAGGCGGAATTAATGAGGAAGAAACAAAACAACCAGTGTTCCCCCAGCAATCTGAAGAGACAAACACATCATACCACGAAATGGCTGAAGTTGAACACCAACATATGAGCAAAATATTAAATGAAAAAGTGGTGACAACAGCAGATATAGAAACCATCTTAGATGGTTACAATATGAACAAGCAACCGTTGTTGATTTATAATGGGTGGGCGGATTTTGTT…	485	14727	AB597230.1 Bell pepper endornavirus genomic RNA, complete genome, host: Capsicum annuum cv. Kyosuzu
TRINITY_DN913_c0_g1_i1	NC_027920.1	66.42	405	124	7	11	409	4953	5351	2.36e-19	96.9	NC_027920.1	106	269	269	12	66.42	1	1	TCACACGAGCAAAACTAAAAGTAGTATGGGTAAGTGTCGAGGTGTCAAACCGAATGACCCTGCTTGACAAGTTGCGTGGCACTGAACTAGACATAATTGGAGGTGGTAAACAACCGGCGGTAACGGAGCATAGCGACACACTTCACCAAACATTGTTGGATACGCTGCAAGGCGGAATTAATGAGGAAGAAACAAAACAACCAGTGTTCCCCCAGCAATCTGAAGAAACAAGCACATCA-TACCACGAAATGGCTGAAGTTGAAC----ATCAACATATGAGCAAAATATTA-AATGAAAAAGTGGTGACAACAGCAGATATAGAAACCATCTTAGATGGTTACAATATGAACAAGCAACCGTTGTTGATTTACAATGGGTGGGCGGATTTTGTTGAGA…	TCACAAGAGCAAAACTAAGCATGGTGTGGGTCAGTATAGAAGTGTCAAACAAAATGACTTTATTGGACAAATTACGGGGCACTGAGCTAGACATCACCGGAGGAGGTGAACCATCTGAGGAAAAGAAACAAAGTGAAACATTACAAAAGAGGTTATTGGAAGCCCTGCAATCTGGTGTTGATGAAGAAGCAATGGCTAAACCAGTATTCCCAGAAGTAGGCGAAGGCTC---CAAATCTGTACGTAGTCATGT-TGA-GTACAATTTGGATCAACC-AGAAACTAAGCTTGACAATGACAAATTCGTGACTATGAATGATATAGACACAATTTTGGACAACTACAACATGAGCAAACAACCGCTATTAATTTATGATGGATGGCAAGATTTTGTTGAAA…	485	14729	NC_027920.1 Hot pepper endornavirus isolate CS, complete genome
TRINITY_DN913_c1_g1_i1	JQ951943.1	99.519	208	1	0	1	208	5888	6095	2.86e-102	370	JQ951943.1	410	207	207	0	99.52	1	1	GTCAGATTGGTGCGTTGTTATACCCGGCGGCACCAATGCTGTATCCGATGAAATCAACATCGCTAATAGCATTAGTATATGCTACATTACCAAATGTGAAATTAACCACAGTTGTCAAAGAGTTGGACAATGGATTCGAAGTTACTATGAGCACAGTAGCTCAATTAATAGTAATAATTGCAGTGACTGGAGATGGATTGTTGTTGGA	GTCAGATTGGTGCGTTGTTAAACCCGGCGGCACCAATGCTGTATCCGATGAAATCAACATCGCTAATAGCATTAGTATATGCTACATTACCAAATGTGAAATTAACCACAGTTGTCAAAGAGTTGGACAATGGATTCGAAGTTACTATGAGCACAGTAGCTCAATTAATAGTAATAATTGCAGTGACTGGAGATGGATTGTTGTTGGA	208	14727	JQ951943.1 Bell pepper endornavirus strain IS RNA-dependent RNA polymerase (RdRp) gene, complete cds
TRINITY_DN913_c1_g1_i1	KT149366.1	99.519	208	1	0	1	208	5888	6095	2.86e-102	370	KT149366.1	410	207	207	0	99.52	1	1	GTCAGATTGGTGCGTTGTTATACCCGGCGGCACCAATGCTGTATCCGATGAAATCAACATCGCTAATAGCATTAGTATATGCTACATTACCAAATGTGAAATTAACCACAGTTGTCAAAGAGTTGGACAATGGATTCGAAGTTACTATGAGCACAGTAGCTCAATTAATAGTAATAATTGCAGTGACTGGAGATGGATTGTTGTTGGA	GTCAGATTGGTGCGTTGTTAAACCCGGCGGCACCAATGCTGTATCCGATGAAATCAACATCGCTAATAGCATTAGTATATGCTACATTACCAAATGTGAAATTAACCACAGTTGTCAAAGAGTTGGACAATGGATTCGAAGTTACTATGAGCACAGTAGCTCAATTAATAGTAATAATTGCAGTGACTGGAGATGGATTGTTGTTGGA	208	14726	KT149366.1 Bell pepper endornavirus, complete genome
TRINITY_DN913_c1_g1_i1	KP455654.1	99.519	208	1	0	1	208	5828	6035	2.86e-102	370	KP455654.1	410	207	207	0	99.52	1	1	GTCAGATTGGTGCGTTGTTATACCCGGCGGCACCAATGCTGTATCCGATGAAATCAACATCGCTAATAGCATTAGTATATGCTACATTACCAAATGTGAAATTAACCACAGTTGTCAAAGAGTTGGACAATGGATTCGAAGTTACTATGAGCACAGTAGCTCAATTAATAGTAATAATTGCAGTGACTGGAGATGGATTGTTGTTGGA	GTCAGATTGGTGCGTTGTTAAACCCGGCGGCACCAATGCTGTATCCGATGAAATCAACATCGCTAATAGCATTAGTATATGCTACATTACCAAATGTGAAATTAACCACAGTTGTCAAAGAGTTGGACAATGGATTCGAAGTTACTATGAGCACAGTAGCTCAATTAATAGTAATAATTGCAGTGACTGGAGATGGATTGTTGTTGGA	208	14659	KP455654.1 Bell pepper endornavirus isolate Maor, complete genome
TRINITY_DN913_c1_g1_i1	KX525267.1	99.519	208	1	0	1	208	5892	6099	2.86e-102	370	KX525267.1	410	207	207	0	99.52	1	1	GTCAGATTGGTGCGTTGTTATACCCGGCGGCACCAATGCTGTATCCGATGAAATCAACATCGCTAATAGCATTAGTATATGCTACATTACCAAATGTGAAATTAACCACAGTTGTCAAAGAGTTGGACAATGGATTCGAAGTTACTATGAGCACAGTAGCTCAATTAATAGTAATAATTGCAGTGACTGGAGATGGATTGTTGTTGGA	GTCAGATTGGTGCGTTGTTAAACCCGGCGGCACCAATGCTGTATCCGATGAAATCAACATCGCTAATAGCATTAGTATATGCTACATTACCAAATGTGAAATTAACCACAGTTGTCAAAGAGTTGGACAATGGATTCGAAGTTACTATGAGCACAGTAGCTCAATTAATAGTAATAATTGCAGTGACTGGAGATGGATTGTTGTTGGA	208	14790	KX525267.1 Bell pepper endornavirus isolate DR Polyprotein gene, complete cds
TRINITY_DN913_c1_g1_i1	AB597230.1	99.038	208	2	0	1	208	5888	6095	3.49e-101	367	AB597230.1	406	206	206	0	99.04	1	1	GTCAGATTGGTGCGTTGTTATACCCGGCGGCACCAATGCTGTATCCGATGAAATCAACATCGCTAATAGCATTAGTATATGCTACATTACCAAATGTGAAATTAACCACAGTTGTCAAAGAGTTGGACAATGGATTCGAAGTTACTATGAGCACAGTAGCTCAATTAATAGTAATAATTGCAGTGACTGGAGATGGATTGTTGTTGGA	GTCAGATTGGTGCGTTGTTAAACCCGGCGGCACCAATGCTGTATCCGATGAAATCAACATCGCTAATAGCATTAGTATATGCTACATTACCAAACGTGAAATTAACCACAGTTGTCAAAGAGTTGGACAATGGATTCGAAGTTACTATGAGCACAGTAGCTCAATTAATAGTAATAATTGCAGTGACTGGAGATGGATTGTTGTTGGA	208	14727	AB597230.1 Bell pepper endornavirus genomic RNA, complete genome, host: Capsicum annuum cv. Kyosuzu
TRINITY_DN913_c1_g1_i1	KX977568.1	99.038	208	2	0	1	208	5895	6102	3.49e-101	367	KX977568.1	406	206	206	0	99.04	1	1	GTCAGATTGGTGCGTTGTTATACCCGGCGGCACCAATGCTGTATCCGATGAAATCAACATCGCTAATAGCATTAGTATATGCTACATTACCAAATGTGAAATTAACCACAGTTGTCAAAGAGTTGGACAATGGATTCGAAGTTACTATGAGCACAGTAGCTCAATTAATAGTAATAATTGCAGTGACTGGAGATGGATTGTTGTTGGA	GTCAGATTGGTGCGTTGTTAAACCCGGCGGCACCAATGCTGTATCCGATGAAATCAACATCGCTAATAGCATTAGTATATGCTACATTACCAAATGTGAAATTAACCACAGTTGTCAAAGAGTTGGACAATGGATTCGAAGTTACTATGAGCACAGTTGCTCAATTAATAGTAATAATTGCAGTGACTGGAGATGGATTGTTGTTGGA	208	14727	KX977568.1 Bell pepper endornavirus isolate Santa Fe, complete genome
TRINITY_DN913_c1_g1_i1	KX977569.1	99.038	208	2	0	1	208	5889	6096	3.49e-101	367	KX977569.1	406	206	206	0	99.04	1	1	GTCAGATTGGTGCGTTGTTATACCCGGCGGCACCAATGCTGTATCCGATGAAATCAACATCGCTAATAGCATTAGTATATGCTACATTACCAAATGTGAAATTAACCACAGTTGTCAAAGAGTTGGACAATGGATTCGAAGTTACTATGAGCACAGTAGCTCAATTAATAGTAATAATTGCAGTGACTGGAGATGGATTGTTGTTGGA	GTCAGATTGGTGCGTTGTTAAACCCGGCGGCACCAATGCTGTATCCGATGAAATCAACATCGCTAATAGCATTAGTATATGCTACATTACCAAATGTGAAATTAACCACAGTTGTCAAAGAGTTGGACAATGGATTCGAAGTTACTATGAGCACAGTTGCTCAATTAATAGTAATAATTGCAGTGACTGGAGATGGATTGTTGTTGGA	208	14714	KX977569.1 Bell pepper endornavirus isolate Penol, complete genome
TRINITY_DN913_c1_g1_i1	NC_015781.2	82.692	208	36	0	1	208	5889	6096	4.85e-55	214	NC_015781.2	236	172	172	0	82.69	1	1	GTCAGATTGGTGCGTTGTTATACCCGGCGGCACCAATGCTGTATCCGATGAAATCAACATCGCTAATAGCATTAGTATATGCTACATTACCAAATGTGAAATTAACCACAGTTGTCAAAGAGTTGGACAATGGATTCGAAGTTACTATGAGCACAGTAGCTCAATTAATAGTAATAATTGCAGTGACTGGAGATGGATTGTTGTTGGA	GTCAAATTAGCGCATTGTTAAACCCGTCAGCACCAATGTTGTACCCAATGAAATCAACATCGTTATTGGCACTGGTTTGTGCTACACTACCAAACGTGAAGTTAACCACAATTGTCAAAGAGTTAGAAAATGGGTTTGAATTATCTATGAGCACAGTGGCTCAACAAATAGCCACAATTGCAGTAACTGGAGATGGACTGTTGTTGGA	208	14728	NC_015781.2 Bell pepper endornavirus, complete genome
TRINITY_DN913_c1_g1_i1	NC_027920.1	69.274	179	55	0	22	200	5907	6085	3.07e-13	75.2	NC_027920.1	82	124	124	0	69.27	1	1	ACCCGGCGGCACCAATGCTGTATCCGATGAAATCAACATCGCTAATAGCATTAGTATATGCTACATTACCAAATGTGAAATTAACCACAGTTGTCAAAGAGTTGGACAATGGATTCGAAGTTACTATGAGCACAGTAGCTCAATTAATAGTAATAATTGCAGTGACTGGAGATGGATTG	ACCCGTCATCACCAATGTTTTATCCAATGAAATCAACATCAGTGTTGGCACTAGTGAATGCCACTTTGCCAAATGTGAGATTAACAACCATAATTAAAGAAATTAGCGGTGGATTTGAGTTAACCATAAGTACTACAGCTCAAATTGTGGCCATAATCACTGTCACAGGGCACGGATTG	208	14729	NC_027920.1 Hot pepper endornavirus isolate CS, complete genome
TRINITY_DN913_c2_g1_i1	AB597230.1	97.924	289	6	0	1	289	5927	5639	1.46e-139	495	AB597230.1	548	283	283	0	97.92	1	-1	AGCATTGGTGCCGCCGGGTTTAACAACGCAACAATCTGACTATAATTTAAGTTTGCTAATGATGGATACTTATTTCTCAGCTGTCTATCCGTTAATATTCTGTTCATTTCTAAATTTGACAATGCGGCATCCTCTAAAACTGCTTGAGTGTCTTCTGGTAGATCTTCACTCAATGCATCTTCCCATTCGTCCCCTTCAGAATCCACATCAACAATTCGCTTCAAATTTTGGTTGTTTTTCGTTTCTGATATTTGTGTAGTGGTTGGCACTTAGAACTATGGCTGCCAAT	AGCATTGGTGCCGCCGGGTTTAACAACGCACCAATCTGACTATAATTTAAGTTTGCTAATGATGGATACTTATTTCTCAGCTGTCTATCCGTTAATATTCTGTTCATTTCTAAATTTGACAATGCGGCATCCTCTAAAGCTGCTTGAGTGTCTTCTGGTAGATCTTCACTCAATGCATCTTCCCATTCGTCCCCTTCAGAATCCACATCAACAATTCGCTTCAAATTTTGGTTGTTTTTCGTTTCTGCTATTGGTGTAGTGGTTGGCACTTCGAACTCTGGCTGCCAAT	294	14727	AB597230.1 Bell pepper endornavirus genomic RNA, complete genome, host: Capsicum annuum cv. Kyosuzu
TRINITY_DN913_c2_g1_i1	JQ951943.1	97.924	289	6	0	1	289	5927	5639	1.46e-139	495	JQ951943.1	548	283	283	0	97.92	1	-1	AGCATTGGTGCCGCCGGGTTTAACAACGCAACAATCTGACTATAATTTAAGTTTGCTAATGATGGATACTTATTTCTCAGCTGTCTATCCGTTAATATTCTGTTCATTTCTAAATTTGACAATGCGGCATCCTCTAAAACTGCTTGAGTGTCTTCTGGTAGATCTTCACTCAATGCATCTTCCCATTCGTCCCCTTCAGAATCCACATCAACAATTCGCTTCAAATTTTGGTTGTTTTTCGTTTCTGATATTTGTGTAGTGGTTGGCACTTAGAACTATGGCTGCCAAT	AGCATTGGTGCCGCCGGGTTTAACAACGCACCAATCTGACTATAATTTAAGTTTGCTAATGATGGATACTTATTTCTCAGCTGTCTATCCGTTAATATTCTGTTCATTTCTAAATTTGACAATGCGGCATCCTCTAAAGCTGCTTGAGTGTCTTCTGGTAGATCTTCACTCAATGCATCTTCCCATTCGTCCCCTTCAGAATCCACATCAACAATTCGCTTCAAATTTTGGTTGTTTTTCGTTTCTGCTATTGGTGTAGTGGTTGGCACTTCGAACTCTGGCTGCCAAT	294	14727	JQ951943.1 Bell pepper endornavirus strain IS RNA-dependent RNA polymerase (RdRp) gene, complete cds
TRINITY_DN913_c2_g1_i1	KT149366.1	97.924	289	6	0	1	289	5927	5639	1.46e-139	495	KT149366.1	548	283	283	0	97.92	1	-1	AGCATTGGTGCCGCCGGGTTTAACAACGCAACAATCTGACTATAATTTAAGTTTGCTAATGATGGATACTTATTTCTCAGCTGTCTATCCGTTAATATTCTGTTCATTTCTAAATTTGACAATGCGGCATCCTCTAAAACTGCTTGAGTGTCTTCTGGTAGATCTTCACTCAATGCATCTTCCCATTCGTCCCCTTCAGAATCCACATCAACAATTCGCTTCAAATTTTGGTTGTTTTTCGTTTCTGATATTTGTGTAGTGGTTGGCACTTAGAACTATGGCTGCCAAT	AGCATTGGTGCCGCCGGGTTTAACAACGCACCAATCTGACTATAATTTAAGTTTGCTAATGATGGATACTTATTTCTCAGCTGTCTATCCGTTAATATTCTGTTCATTTCTAAATTTGACAATGCGGTATCCTCTAAAACTGCTTGAGTGTCTTCTGGTAGATCTTCACTCAATGCATCTTCCCATTCGTCCCCTTCAGAATCCACATCAACAATTCGCTTCAAATTTTGGTTGTTTTTCGTTTCTGCTATTGGTGTAGTGGTTGGCACTTCGAACTCTGGCTGCCAAT	294	14726	KT149366.1 Bell pepper endornavirus, complete genome
TRINITY_DN913_c2_g1_i1	KP455654.1	97.924	289	6	0	1	289	5867	5579	1.46e-139	495	KP455654.1	548	283	283	0	97.92	1	-1	AGCATTGGTGCCGCCGGGTTTAACAACGCAACAATCTGACTATAATTTAAGTTTGCTAATGATGGATACTTATTTCTCAGCTGTCTATCCGTTAATATTCTGTTCATTTCTAAATTTGACAATGCGGCATCCTCTAAAACTGCTTGAGTGTCTTCTGGTAGATCTTCACTCAATGCATCTTCCCATTCGTCCCCTTCAGAATCCACATCAACAATTCGCTTCAAATTTTGGTTGTTTTTCGTTTCTGATATTTGTGTAGTGGTTGGCACTTAGAACTATGGCTGCCAAT	AGCATTGGTGCCGCCGGGTTTAACAACGCACCAATCTGACTATAATTTAATTTTGCTAATGATGGATACTTATTTCTCAGCTGTCTATCCGTTAATATTCTGTTCATTTCTAAATTTGACAATGCGGCATCCTCTAAAACTGCTTGAGTGTCTTCTGGTAGATCTTCACTCAATGCATCTTCCCATTCGTCCCCTTCAGAATCCACATCAACAATTCGCTTCAAATTTTGGTTGTTTTTCGTTTCTGCTATTGGTGTAGTGGTTGGCACTTCGAACTCTGGCTGCCAAT	294	14659	KP455654.1 Bell pepper endornavirus isolate Maor, complete genome
TRINITY_DN913_c2_g1_i1	KX525267.1	97.924	289	6	0	1	289	5931	5643	1.46e-139	495	KX525267.1	548	283	283	0	97.92	1	-1	AGCATTGGTGCCGCCGGGTTTAACAACGCAACAATCTGACTATAATTTAAGTTTGCTAATGATGGATACTTATTTCTCAGCTGTCTATCCGTTAATATTCTGTTCATTTCTAAATTTGACAATGCGGCATCCTCTAAAACTGCTTGAGTGTCTTCTGGTAGATCTTCACTCAATGCATCTTCCCATTCGTCCCCTTCAGAATCCACATCAACAATTCGCTTCAAATTTTGGTTGTTTTTCGTTTCTGATATTTGTGTAGTGGTTGGCACTTAGAACTATGGCTGCCAAT	AGCATTGGTGCCGCCGGGTTTAACAACGCACCAATCTGACTATAATTTAAGTTTGCTAATGATGGATACTTATTTCTCAGCTGTCTATCCGTTAATATTCTGTTCATTTCTAAATTTGACAATGCGGTATCCTCTAAAACTGCTTGAGTGTCTTCTGGTAGATCTTCACTCAATGCATCTTCCCATTCGTCCCCTTCAGAATCCACATCAACAATTCGCTTCAAATTTTGGTTGTTTTTCGTTTCTGCTATTGGTGTAGTGGTTGGCACTTCGAACTCTGGCTGCCAAT	294	14790	KX525267.1 Bell pepper endornavirus isolate DR Polyprotein gene, complete cds
TRINITY_DN913_c2_g1_i1	KX977569.1	97.578	289	7	0	1	289	5928	5640	6.22e-138	489	KX977569.1	542	282	282	0	97.58	1	-1	AGCATTGGTGCCGCCGGGTTTAACAACGCAACAATCTGACTATAATTTAAGTTTGCTAATGATGGATACTTATTTCTCAGCTGTCTATCCGTTAATATTCTGTTCATTTCTAAATTTGACAATGCGGCATCCTCTAAAACTGCTTGAGTGTCTTCTGGTAGATCTTCACTCAATGCATCTTCCCATTCGTCCCCTTCAGAATCCACATCAACAATTCGCTTCAAATTTTGGTTGTTTTTCGTTTCTGATATTTGTGTAGTGGTTGGCACTTAGAACTATGGCTGCCAAT	AGCATTGGTGCCGCCGGGTTTAACAACGCACCAATCTGACTATAATTTAAGTTTGCTAATGATGGATACTTATTTCTCAGCTGTCTATCCGTTAATATTCTGTTCATTTCTAAATTTGACAATGCGGCATCCTCTAAAGCGGCTTGAGTGTCTTCTGGTAGATCTTCACTCAATGCATCTTCCCATTCGTCCCCTTCAGAATCCACATCAACAATTCGCTTCAAATTTTGGTTGTTTTTCGTTTCTGCTATTTTTGTAGTGGTTGGCACTTCGAACTCTGGCTGCCAAT	294	14714	KX977569.1 Bell pepper endornavirus isolate Penol, complete genome
TRINITY_DN913_c2_g1_i1	KX977568.1	97.232	289	8	0	1	289	5934	5646	7.57e-137	486	KX977568.1	538	281	281	0	97.23	1	-1	AGCATTGGTGCCGCCGGGTTTAACAACGCAACAATCTGACTATAATTTAAGTTTGCTAATGATGGATACTTATTTCTCAGCTGTCTATCCGTTAATATTCTGTTCATTTCTAAATTTGACAATGCGGCATCCTCTAAAACTGCTTGAGTGTCTTCTGGTAGATCTTCACTCAATGCATCTTCCCATTCGTCCCCTTCAGAATCCACATCAACAATTCGCTTCAAATTTTGGTTGTTTTTCGTTTCTGATATTTGTGTAGTGGTTGGCACTTAGAACTATGGCTGCCAAT	AGCATTGGTGCCGCCGGGTTTAACAACGCACCAATCTGACTATAATTTAAGTTTGCTAATGATGGATACTTATTTCTCAGCTGTCTATCCGTTAATATTCTGTTCATTTCTAAATTTGACAATGCGGCATCCTCTAAAGCGGCTTGAGTGTCTTCTGGTAGATCTTCACTCAATGCATCTTCCCATTCGTCCCCTTCAGAATCCACATCAACAATTCGCTTCAAATTTTGGTTGTTTTTCGTTTCTGCTAATTTTGTAGTGGTTGGCACTTCGAACTCTGGCTGCCAAT	294	14727	KX977568.1 Bell pepper endornavirus isolate Santa Fe, complete genome
TRINITY_DN913_c2_g1_i1	NC_015781.2	78.966	290	57	3	3	290	5926	5639	1.79e-62	239	NC_015781.2	264	229	229	4	78.97	1	-1	CATTGGTGCCGCCGGGTTTAACAACGCAACAATCTGACTATAATTTAAGTTTGCTAATGATGGATACTTATTTCTCAGCTGTCTATCCGTTAATATTCTGTTCATTTCTAAATTTGACAATGCGGCATCCTCTAAAACTGCTTGAGTGTCTTCTGGTAGATCTTCACTCAATGCATCTTCCCATTCGTCCCCTTCAGAATCCACATCAACAATTCGCTTCAAATTTTGGTTG--TTTTTCGTTTCTGATATTTGTGTAGTGGTTGGCACTTAGAACTATGGCTGCCAATT	CATTGGTGCTGACGGGTTTAACAATGCGCTAATTTGACCATAATTTAAGTTTGCCAATGCTGGATATTTATTTCTCAATTGTCTATCTGTCAATATTCTGTTCATCTCTAAATTGGATAATGTGGCATTTTCTAAAACTGCTTCAGTGTCTTCTGATAAATCATCACTTAGAGCATCTTCCCATTCATCCCCTTCGGAGTCTACCTCCACGATCTTCTTTAATTTTTCATTGTCTTTTTCCTTT-TG-TGTTGGTTTGGTGACTGGTGTTGCAAACTCTGGTTGCCAATT	294	14728	NC_015781.2 Bell pepper endornavirus, complete genome
TRINITY_DN913_c2_g1_i1	NC_027920.1	69.767	172	44	3	42	209	5884	5717	1.91e-11	69.8	NC_027920.1	76	120	120	8	69.77	1	-1	ATAATTTAAGTTTGCTAATGATGGATACTTATTTCTCAGCTGTCTATCCGTTAATATTCTGTTCATTTCTAAATTTGACAATGCGGCATCCTCTAAAACTGCTTG----AGTGTCTTCTGGTAGATCTTCACTCAATGCATCTTCCCATTCGTCCCCTTCAGAATCCACATC	ATAGTTCAATTCTGCCAATGCTGGGTAATTTTTACACAGTTGTCTGTCTTGTATCAACCGGTTCATTTCAAGTTGTGCCAATGTGG--TTGTCTCAA--TGTTTGTGACAGTTTCCTCTACAAGTTCCTCACTCAATGCATCCTCCCATTCATCTCCATCTGAATCCACTTC	294	14729	NC_027920.1 Hot pepper endornavirus isolate CS, complete genome
TRINITY_DN998_c0_g1_i1	KP455654.1	99.584	722	3	0	1	722	7718	6997	0	1288	KP455654.1	1428	719	719	0	99.58	1	-1	GGTTGCTTGCCAACTCCATATGCATGCTCCATTTTCTCCATCATGTTGTTGCAGTCAGTCAAGTTCTGATAGTACCTAAAAGCATGTTTGTTGTCAGGCGGGGTGCAAAAGTTGGCCCAACTTGACGTTAATATTGAAAGGTATGGATAGTCTGTAATCATTTGGCTCACTTCGCCTCGTGACAACCCATTGTAAAAGTATTTGAGACATATCTGTTCTGTCAACATGTCAAAACCTTGATCAATTGTGTCGCAACCCTGTTCCTCTATTGGCATCCCTTCACAGTCACGTTGTAGCATGGGGCCATAATTCTGTAGTTGCGTTTTGCTGACGAACACTATATGATAGGTCTTTTTCATGGTGCTCAACACAGCCTCCCCTCTTTTCTCTACCAAAAAT…	GGTTGCTTGCCAACTCCATATGCATGCTCCATTTTCTCCATCATGTTGTTGCAGTCAGTCAAGTTCTGATAGTACCTAAAAGCATGTTTTTTGTCAGGCGGGGTGCAAAAGTTGGCCCAACTTGACGTTAATATTGAAAGGTATGGATAGTCTGTAATCATTTGGCTCACTTCGCCTCGTGACAACCCATTGTAAAAGTATTTGAGACATATCTGTTCTGTCAACATGTCAAAACCTTGATCAATTGTGTCGCAACCCTGTTCCTCTATTGGCATCCCTTCACAGTCACGTTGTAGCATGGGGCCATAATTCTGTAGTTGCGTTTTGCTGACGAACACTATATGATAGGTCTTTTTCATGGTGCTCAACACAGCCTCCCCTCTTTTCTCTACCAAAAAT…	722	14659	KP455654.1 Bell pepper endornavirus isolate Maor, complete genome
TRINITY_DN998_c0_g1_i1	AB597230.1	99.307	722	5	0	1	722	7778	7057	0	1279	AB597230.1	1418	717	717	0	99.31	1	-1	GGTTGCTTGCCAACTCCATATGCATGCTCCATTTTCTCCATCATGTTGTTGCAGTCAGTCAAGTTCTGATAGTACCTAAAAGCATGTTTGTTGTCAGGCGGGGTGCAAAAGTTGGCCCAACTTGACGTTAATATTGAAAGGTATGGATAGTCTGTAATCATTTGGCTCACTTCGCCTCGTGACAACCCATTGTAAAAGTATTTGAGACATATCTGTTCTGTCAACATGTCAAAACCTTGATCAATTGTGTCGCAACCCTGTTCCTCTATTGGCATCCCTTCACAGTCACGTTGTAGCATGGGGCCATAATTCTGTAGTTGCGTTTTGCTGACGAACACTATATGATAGGTCTTTTTCATGGTGCTCAACACAGCCTCCCCTCTTTTCTCTACCAAAAAT…	GGTTGCTTGCCAACTCCATATGCATGCTCCATTTTCTCCATCATGTTGTTGCAGTCAGTCAAGTTCTGATAGTACCTAAAAGCATGTTTTTTGTCAGGCGGGGTGCAAAAGTTGGCCCAACTTGACGTTAATATTGAAAGGTATGGATAGTCTGTAATCATTTGGCTCACTTCGCCTCGTGACAACCCATTGTAAAAGTATTTGAGACATATCTGTTCTGTCAACATGTCAAAACCTTGATCAATTGTGTCGCAACCCTGTTCCTCTATTGGCATCCCTTCACAGTCACGTTGTAGCATGGGGCCATAATTCTGTAGTTGCGTTTTGCTGACGAACACTATATGATAGGTCTTTTTCATGGTGCTCAACACAGCCTCCCCTCTTTTCTCTACCAAAAAT…	722	14727	AB597230.1 Bell pepper endornavirus genomic RNA, complete genome, host: Capsicum annuum cv. Kyosuzu
TRINITY_DN998_c0_g1_i1	JQ951943.1	99.307	722	5	0	1	722	7778	7057	0	1279	JQ951943.1	1418	717	717	0	99.31	1	-1	GGTTGCTTGCCAACTCCATATGCATGCTCCATTTTCTCCATCATGTTGTTGCAGTCAGTCAAGTTCTGATAGTACCTAAAAGCATGTTTGTTGTCAGGCGGGGTGCAAAAGTTGGCCCAACTTGACGTTAATATTGAAAGGTATGGATAGTCTGTAATCATTTGGCTCACTTCGCCTCGTGACAACCCATTGTAAAAGTATTTGAGACATATCTGTTCTGTCAACATGTCAAAACCTTGATCAATTGTGTCGCAACCCTGTTCCTCTATTGGCATCCCTTCACAGTCACGTTGTAGCATGGGGCCATAATTCTGTAGTTGCGTTTTGCTGACGAACACTATATGATAGGTCTTTTTCATGGTGCTCAACACAGCCTCCCCTCTTTTCTCTACCAAAAAT…	GGTTGCTTGCCAACTCCATATGCATGCTCCATTTTCTCCATCATGTTGTTGCAGTCAGTCAAGTTCTGATAGTACCTAAAAGCATGTTTTTTGTCAGGCGGGGTGCAAAAGTTGGCCCAACTTGACGTTAATATTGAAAGGTATGGATAGTCTGTAATCATTTGGCTCACTTCGCCTCGTGACAACCCATTGTAAAAGTATTTGAGACATATCAGTTCTGTCAACATGTCAAAACCTTGATCAATTGTGTCGCAACCCTGTTCCTCTATTGGCATCCCTTCACAGTCACGTTGTAGCATGGGGCCATAATTCTGTAGTTGCGTTTTGCTGACGAACACTATATGATAGGTCTTTTTCATGGTGCTCAACACAGCCTCCCCTCTTTTCTCTACCAAAAAT…	722	14727	JQ951943.1 Bell pepper endornavirus strain IS RNA-dependent RNA polymerase (RdRp) gene, complete cds
TRINITY_DN998_c0_g1_i1	KT149366.1	99.307	722	5	0	1	722	7778	7057	0	1279	KT149366.1	1418	717	717	0	99.31	1	-1	GGTTGCTTGCCAACTCCATATGCATGCTCCATTTTCTCCATCATGTTGTTGCAGTCAGTCAAGTTCTGATAGTACCTAAAAGCATGTTTGTTGTCAGGCGGGGTGCAAAAGTTGGCCCAACTTGACGTTAATATTGAAAGGTATGGATAGTCTGTAATCATTTGGCTCACTTCGCCTCGTGACAACCCATTGTAAAAGTATTTGAGACATATCTGTTCTGTCAACATGTCAAAACCTTGATCAATTGTGTCGCAACCCTGTTCCTCTATTGGCATCCCTTCACAGTCACGTTGTAGCATGGGGCCATAATTCTGTAGTTGCGTTTTGCTGACGAACACTATATGATAGGTCTTTTTCATGGTGCTCAACACAGCCTCCCCTCTTTTCTCTACCAAAAAT…	GGTTGCTTGCCAACTCCATATGCATGCTCCATTTTCTCCATCATGTTGTTGCAGTCAGTCAAGTTCTGATAGTACCTAAAAGCATGTTTTTTGTCAGGCGGGGTGCAAAAGTTGGCCCAACTTGACGTTAATATTGAAAGGTATGGATAGTCTGTAATCATTTGGCTCACTTCGCCTCGTGACAACCCATTGTAAAAGTATTTGAGACATATCTGTTCTGTCAACATGTCAAAACCTTGATCAATTGTGTCGCAACCCTGTTCCTCTATTGGCATCCCTTCACAGTCACGTTGTAGCATGGGGCCATAATTCTGTAGTTGCGTTTTGCTGACAAACACTATATGATAGGTCTTTTTCATGGTGCTCAACACAGCCTCCCCTCTTTTCTCTACCAAAAAT…	722	14726	KT149366.1 Bell pepper endornavirus, complete genome
TRINITY_DN998_c0_g1_i1	KX977568.1	99.169	722	6	0	1	722	7785	7064	0	1276	KX977568.1	1414	716	716	0	99.17	1	-1	GGTTGCTTGCCAACTCCATATGCATGCTCCATTTTCTCCATCATGTTGTTGCAGTCAGTCAAGTTCTGATAGTACCTAAAAGCATGTTTGTTGTCAGGCGGGGTGCAAAAGTTGGCCCAACTTGACGTTAATATTGAAAGGTATGGATAGTCTGTAATCATTTGGCTCACTTCGCCTCGTGACAACCCATTGTAAAAGTATTTGAGACATATCTGTTCTGTCAACATGTCAAAACCTTGATCAATTGTGTCGCAACCCTGTTCCTCTATTGGCATCCCTTCACAGTCACGTTGTAGCATGGGGCCATAATTCTGTAGTTGCGTTTTGCTGACGAACACTATATGATAGGTCTTTTTCATGGTGCTCAACACAGCCTCCCCTCTTTTCTCTACCAAAAAT…	GGTTGCTTGCCAACTCCATATGCATGCTCCATTTTCTCCATCATGTTGTTGCAGTCAGTCAAGTTCTGATAGTACCTAAAAGCATGTTTTTTGTCAGGCGGGGTGCAAAAGTTGGCCCAACTTGACGTTAATATTGAAAGGTATGGATAGTCTGTAATCATTTGGCTCACTTCGCCTCGTGACAACCCATTGTAAAAGTATTTGAGACATATCTGTTCTGTCAACATGTCAAAACCTTGATCAATTGTGTCGCAACCCTGTTCCTCTATTGGCATTCCTTCACAGTCACGTTGTAGCATGGGTCCATAATTCTGTAGTTGCGTTTTGCTGACGAACACTATATGATAGGTCTTTTTCATGGTGCTCAACACAGCCTCCCCTCTTTTCTCTACCAAAAAT…	722	14727	KX977568.1 Bell pepper endornavirus isolate Santa Fe, complete genome
TRINITY_DN998_c0_g1_i1	KX525267.1	99.169	722	6	0	1	722	7782	7061	0	1276	KX525267.1	1414	716	716	0	99.17	1	-1	GGTTGCTTGCCAACTCCATATGCATGCTCCATTTTCTCCATCATGTTGTTGCAGTCAGTCAAGTTCTGATAGTACCTAAAAGCATGTTTGTTGTCAGGCGGGGTGCAAAAGTTGGCCCAACTTGACGTTAATATTGAAAGGTATGGATAGTCTGTAATCATTTGGCTCACTTCGCCTCGTGACAACCCATTGTAAAAGTATTTGAGACATATCTGTTCTGTCAACATGTCAAAACCTTGATCAATTGTGTCGCAACCCTGTTCCTCTATTGGCATCCCTTCACAGTCACGTTGTAGCATGGGGCCATAATTCTGTAGTTGCGTTTTGCTGACGAACACTATATGATAGGTCTTTTTCATGGTGCTCAACACAGCCTCCCCTCTTTTCTCTACCAAAAAT…	GGTTGCTTGCCAACTCCATATGCATGCTCCATTTTCTCCATCATGTTGTTGCAGTCAGTCAAGTTCTGATAGTACCTAAAAGCATGTTTTTTGTCAGGCGGGGTGCAAAAGTTGGCCCAACTTGACGTCAATATTGAAAGGTATGGATAGTCTGTAATCATTTGGCTCACTTCGCCTCGTGACAACCCATTGTAAAAGTATTTGAGACATATCTGTTCTGTCAACATGTCAAAACCTTGATCAATTGTGTCGCAACCTTGTTCCTCTATTGGCATCCCTTCACAGTCACGTTGTAGCATGGGGCCATAATTCTGTAGTTGCGTTTTGCTGACGAATACTATATGATAGGTCTTTTTCATGGTGCTCAACACAGCCTCCCCTCTTTTCTCTACCAAAAAT…	722	14790	KX525267.1 Bell pepper endornavirus isolate DR Polyprotein gene, complete cds
TRINITY_DN998_c0_g1_i1	KX977569.1	99.03	722	7	0	1	722	7779	7058	0	1270	KX977569.1	1408	715	715	0	99.03	1	-1	GGTTGCTTGCCAACTCCATATGCATGCTCCATTTTCTCCATCATGTTGTTGCAGTCAGTCAAGTTCTGATAGTACCTAAAAGCATGTTTGTTGTCAGGCGGGGTGCAAAAGTTGGCCCAACTTGACGTTAATATTGAAAGGTATGGATAGTCTGTAATCATTTGGCTCACTTCGCCTCGTGACAACCCATTGTAAAAGTATTTGAGACATATCTGTTCTGTCAACATGTCAAAACCTTGATCAATTGTGTCGCAACCCTGTTCCTCTATTGGCATCCCTTCACAGTCACGTTGTAGCATGGGGCCATAATTCTGTAGTTGCGTTTTGCTGACGAACACTATATGATAGGTCTTTTTCATGGTGCTCAACACAGCCTCCCCTCTTTTCTCTACCAAAAAT…	GGTTGCTTGCCAACTCCATATGCATGCTCCATTTTCTCCATCATGTTGTTGCAGTCAGTCAAGTTTTGATAGTACCTAAAAGCATGTTTTTTGTCAGGCGGGGTGCAAAAGTTGGCCCAACTTGACGTTAATATTGAAAGGTATGGATAGTCTGTAATCATTTGGCTCACTTCGCCTCGTGACAACCCATTGTAAAAGTATTTGAGACATATCTGTTCTGTCAACATGTCAAAACCTTGATCAATTGTGTCGCAACCCTGTTCCTCTATTGGCATTCCTTCACAGTCACGTTGTAGCATGGGTCCATAATTCTGTAGTTGCGTTTTGCTGACGAACACTATATGATAGGTCTTTTTCATGGTGCTCAACACAGCCTCCCCTCTTTTCTCTACCAAAAAT…	722	14714	KX977569.1 Bell pepper endornavirus isolate Penol, complete genome
TRINITY_DN998_c0_g1_i1	NC_015781.2	88.504	722	83	0	1	722	7779	7058	0	928	NC_015781.2	1028	639	639	0	88.5	1	-1	GGTTGCTTGCCAACTCCATATGCATGCTCCATTTTCTCCATCATGTTGTTGCAGTCAGTCAAGTTCTGATAGTACCTAAAAGCATGTTTGTTGTCAGGCGGGGTGCAAAAGTTGGCCCAACTTGACGTTAATATTGAAAGGTATGGATAGTCTGTAATCATTTGGCTCACTTCGCCTCGTGACAACCCATTGTAAAAGTATTTGAGACATATCTGTTCTGTCAACATGTCAAAACCTTGATCAATTGTGTCGCAACCCTGTTCCTCTATTGGCATCCCTTCACAGTCACGTTGTAGCATGGGGCCATAATTCTGTAGTTGCGTTTTGCTGACGAACACTATATGATAGGTCTTTTTCATGGTGCTCAACACAGCCTCCCCTCTTTTCTCTACCAAAAAT…	GGTTGTTTCCCAGCTCCATAAGCATGCTCCATTTTTTCCATCATGTTATTACAATCAGTCAAATTCTGATAGTATCTGAATGCATGCTTTTTATCAGGTGGAGTACAGAAATTGGCCCAACTTGATGTTAATATTGAAAGGTATGGATAGTCTGTAATCGTTTGGCTCACTTCACCTCGCGACAAACCGTTATAAAAGTATTTTAAACATATTTGTTCTGTCAACATGTCGAATCCTTGATCGATTGTATCACAACCTTGTTCCTCTATTGGCATTCCTTCGCAGTCACGTTGTAGCATAGGCCCATAATTCTGTAGTTGCGTTTTGCTAACAAAAACTATGTGGTATGTCTTTTTCATGGTACTCAACACAGCCTCCCCTCTTTTCTCAACCAAAAAT…	722	14728	NC_015781.2 Bell pepper endornavirus, complete genome
TRINITY_DN998_c0_g1_i1	NC_027920.1	77.222	720	164	0	3	722	7774	7055	1.09e-158	560	NC_027920.1	620	556	556	0	77.22	1	-1	TTGCTTGCCAACTCCATATGCATGCTCCATTTTCTCCATCATGTTGTTGCAGTCAGTCAAGTTCTGATAGTACCTAAAAGCATGTTTGTTGTCAGGCGGGGTGCAAAAGTTGGCCCAACTTGACGTTAATATTGAAAGGTATGGATAGTCTGTAATCATTTGGCTCACTTCGCCTCGTGACAACCCATTGTAAAAGTATTTGAGACATATCTGTTCTGTCAACATGTCAAAACCTTGATCAATTGTGTCGCAACCCTGTTCCTCTATTGGCATCCCTTCACAGTCACGTTGTAGCATGGGGCCATAATTCTGTAGTTGCGTTTTGCTGACGAACACTATATGATAGGTCTTTTTCATGGTGCTCAACACAGCCTCCCCTCTTTTCTCTACCAAAAATCG…	TTGCTTTCCAATACCATAAGAGTGTTCCATTTTTTCCATCATGTTATTGCAATCAGCTAGGTTTTGATGGTATCTAAATGCATATTTTTTGTCTGGGGGTGTGCAAAAGTTCGCCCAACTCGACGTCAATATTGACAGATATGGGTAATCAGTTATCATTTGACTCACTTCTCCCCTAGACAGCCCATTATAAAAATACTTGAGACATATTTGCTCAGTCAACATGTCAAATCCCTGATCAATTGTTTCACATCCCTGTTCTTCTATTGGCATACCATCACAATCTCGTTGCAACATTGGACCATAGTTTTGCAATTGCAACTTGCTAACAAATACTATGTGATATGTTTTCTTCATTGTGCTCAAGACTGCTTCACCCCTCTTTTCCACCAAAAATCT…	722	14729	NC_027920.1 Hot pepper endornavirus isolate CS, complete genome
TRINITY_DN998_c1_g1_i1	KT149366.1	99.767	857	2	0	1	857	7086	6230	0	1537	KT149366.1	1704	855	855	0	99.77	1	-1	AGGACGACCATTCAATGTCCTATGTCCTGGTGTGTTCACTATCATTGGGATTTCAATGTTTGGTATGTGGTTTGCAATTTCACTCAACAAATTGTTGTTTTCATCTTCAAACATTTTGCATGCTGATTGTGACTCTCGGTCTGCAATTAGTCTCCATAAATACTTTGGGGCAATGCTTATTTTTTCAAACAGCATGCCTAGTTCATACCACGGACACTTCAATGCGTTGTCTACATTGGATAACAAATCTAAATAAATTGGCTCGTCGTTCATGCAATTTCCAACTCCCATGTTATTCATATGCATTGAGATCATTATACTGTTTAACACTGCGGGATAAGCAGAGTGATTTAGCCTTAATCGTCTCACGTTGCCCATTGTTCTCTGCGGGGAAATTCG…	AGGACGACCATTCAATGACCTATGTCCTGGTGTGTTCACTATCATTGGGATTTCAATGTTTGGTATGTGGTTTGCAATTTCACTCAACAAATTGTTGTTTTCATCTTCAAACATTTTGCATGCTGATTGTGACTCTCGGTCTGCAATTAGTCTCCATAAATACTTTGGGGCAATGCTTATTTTTTCAAACAGCATGCCTAGTTCATACCACGGACACTTCAATGCGTTGTCTACATTGGATAACAAATCTAAATAAATTGGCTCGTCGTTCATGCAATTTCCAACTCCCATGTTATTCATATGCATTGAGATCATTATACTGTTTAACACTGCGGGATAAGCAGAGTGATTTAGCCTTAATCGTCTCACGTTGCCCATTGTTCTCTGCGGGGAAATTCG…	857	14726	KT149366.1 Bell pepper endornavirus, complete genome
TRINITY_DN998_c1_g1_i1	KP455654.1	99.767	857	2	0	1	857	7026	6170	0	1537	KP455654.1	1704	855	855	0	99.77	1	-1	AGGACGACCATTCAATGTCCTATGTCCTGGTGTGTTCACTATCATTGGGATTTCAATGTTTGGTATGTGGTTTGCAATTTCACTCAACAAATTGTTGTTTTCATCTTCAAACATTTTGCATGCTGATTGTGACTCTCGGTCTGCAATTAGTCTCCATAAATACTTTGGGGCAATGCTTATTTTTTCAAACAGCATGCCTAGTTCATACCACGGACACTTCAATGCGTTGTCTACATTGGATAACAAATCTAAATAAATTGGCTCGTCGTTCATGCAATTTCCAACTCCCATGTTATTCATATGCATTGAGATCATTATACTGTTTAACACTGCGGGATAAGCAGAGTGATTTAGCCTTAATCGTCTCACGTTGCCCATTGTTCTCTGCGGGGAAATTCG…	AGGACGACCATTCAATGACCTATGTCCTGGTGTGTTCACTATCATTGGGATTTCAATGTTTGGTATGTGGTTTGCAATTTCACTCAACAAATTGTTGTTTTCATCTTCAAACATTTTGCATGCTGATTGTGACTCTCGGTCTGCAATTAGTCTCCATAAATACTTTGGGGCAATGCTTATTTTTTCAAACAGCATGCCTAGTTCATACCACGGACACTTCAATGCGTTGTCTACATTGGATAACAAATCTAAATAAATTGGCTCGTCGTTCATGCAATTTCCAACTCCCATGTTATTCATATGCATTGAGATCATTATACTGTTTAACACTGCGGGATAAGCAGAGTGATTTAGCCTTAATCGTCTCACGTTGCCCATTGTTCTCTGCGGGGAAATTCG…	857	14659	KP455654.1 Bell pepper endornavirus isolate Maor, complete genome
TRINITY_DN998_c1_g1_i1	KX525267.1	99.65	857	3	0	1	857	7090	6234	0	1532	KX525267.1	1698	854	854	0	99.65	1	-1	AGGACGACCATTCAATGTCCTATGTCCTGGTGTGTTCACTATCATTGGGATTTCAATGTTTGGTATGTGGTTTGCAATTTCACTCAACAAATTGTTGTTTTCATCTTCAAACATTTTGCATGCTGATTGTGACTCTCGGTCTGCAATTAGTCTCCATAAATACTTTGGGGCAATGCTTATTTTTTCAAACAGCATGCCTAGTTCATACCACGGACACTTCAATGCGTTGTCTACATTGGATAACAAATCTAAATAAATTGGCTCGTCGTTCATGCAATTTCCAACTCCCATGTTATTCATATGCATTGAGATCATTATACTGTTTAACACTGCGGGATAAGCAGAGTGATTTAGCCTTAATCGTCTCACGTTGCCCATTGTTCTCTGCGGGGAAATTCG…	AGGACGACCATTCAATGACCTATGTCCTGGTGTGTTCACTATCATTGGGATTTCAATGTTTGGTATGTGGTTTGCAATTTCACTCAACAAATTGTTGTTTTCATCTTCAAACATTTTGCATGCTGATTGTGACTCTCGGTCTGCAATTAGTCTCCATAAATACTTTGGGGCAATGCTTATTTTTTCAAACAGCATACCTAGTTCATACCACGGACACTTCAATGCGTTGTCTACATTGGATAACAAATCTAAATAAATTGGCTCGTCGTTCATGCAATTTCCAACTCCCATGTTATTCATATGCATTGAGATCATTATACTGTTTAACACTGCGGGATAAGCAGAGTGATTTAGCCTTAATCGTCTCACGTTGCCCATTGTTCTCTGCGGGGAAATTCG…	857	14790	KX525267.1 Bell pepper endornavirus isolate DR Polyprotein gene, complete cds
TRINITY_DN998_c1_g1_i1	AB597230.1	99.533	857	4	0	1	857	7086	6230	0	1528	AB597230.1	1694	853	853	0	99.53	1	-1	AGGACGACCATTCAATGTCCTATGTCCTGGTGTGTTCACTATCATTGGGATTTCAATGTTTGGTATGTGGTTTGCAATTTCACTCAACAAATTGTTGTTTTCATCTTCAAACATTTTGCATGCTGATTGTGACTCTCGGTCTGCAATTAGTCTCCATAAATACTTTGGGGCAATGCTTATTTTTTCAAACAGCATGCCTAGTTCATACCACGGACACTTCAATGCGTTGTCTACATTGGATAACAAATCTAAATAAATTGGCTCGTCGTTCATGCAATTTCCAACTCCCATGTTATTCATATGCATTGAGATCATTATACTGTTTAACACTGCGGGATAAGCAGAGTGATTTAGCCTTAATCGTCTCACGTTGCCCATTGTTCTCTGCGGGGAAATTCG…	AGGACGACCATTCAATGACCTATGTCCTGGTGTGTTCACTATCATTGGGATTTCAATGTTTGGTATGTGGTTTGCAATTTCACTCAACAAATTGTTGTTTTCATCTTCAAACATTTTGCATGCTGATTGTGACTCTCGATCTGCAATTAGTCTCCATAAATACTTTGGGGCAATGCTTATTTTTTCAAACAGCATACCTAGTTCATACCACGGACACTTCAATGCGTTGTCTACATTGGATAACAAATCTAAATAAATTGGCTCGTCGTTCATGCAATTTCCAACTCCCATGTTATTCATATGCATTGAGATCATTATACTGTTTAACACTGCGGGATAAGCAGAGTGATTTAGCCTTAATCGTCTCACGTTGCCCATTGTTCTCTGCGGGGAAATTCG…	857	14727	AB597230.1 Bell pepper endornavirus genomic RNA, complete genome, host: Capsicum annuum cv. Kyosuzu
TRINITY_DN998_c1_g1_i1	KX977568.1	99.417	857	5	0	1	857	7093	6237	0	1523	KX977568.1	1688	852	852	0	99.42	1	-1	AGGACGACCATTCAATGTCCTATGTCCTGGTGTGTTCACTATCATTGGGATTTCAATGTTTGGTATGTGGTTTGCAATTTCACTCAACAAATTGTTGTTTTCATCTTCAAACATTTTGCATGCTGATTGTGACTCTCGGTCTGCAATTAGTCTCCATAAATACTTTGGGGCAATGCTTATTTTTTCAAACAGCATGCCTAGTTCATACCACGGACACTTCAATGCGTTGTCTACATTGGATAACAAATCTAAATAAATTGGCTCGTCGTTCATGCAATTTCCAACTCCCATGTTATTCATATGCATTGAGATCATTATACTGTTTAACACTGCGGGATAAGCAGAGTGATTTAGCCTTAATCGTCTCACGTTGCCCATTGTTCTCTGCGGGGAAATTCG…	AGGACGACCATTCAATGACCTATGTCCTGGTGTGTTCACTATCATTGGGATTTCAATGTTTGGTATGTGGTTTGCAATTTCACTCAACAAATTGTTGTTTTCATCTTCAAACATTTTGCATGCTGATTGTGACTCTCGGTCTGCAATTAGTCTCCATAAATACTTTGGGGCAATGCTTATTTTTTCAAACAGCATACCTAGTTCATACCACGGACACTTCAATGCGTTGTCTACATTGGATAACAAATCTAAATAAATTGGCTCGTCGTTCATGCAATTTCCAACTGCCATGTTATTCATATGCATTGAGATCATTATACTGTTTAACACTGCGGGATAAGCAGAGTGATTTAGCCTTAATCGTCTCACGTTGCCCATTGTTCTCTGCGGGGAAATTCG…	857	14727	KX977568.1 Bell pepper endornavirus isolate Santa Fe, complete genome
TRINITY_DN998_c1_g1_i1	KX977569.1	99.417	857	5	0	1	857	7087	6231	0	1523	KX977569.1	1688	852	852	0	99.42	1	-1	AGGACGACCATTCAATGTCCTATGTCCTGGTGTGTTCACTATCATTGGGATTTCAATGTTTGGTATGTGGTTTGCAATTTCACTCAACAAATTGTTGTTTTCATCTTCAAACATTTTGCATGCTGATTGTGACTCTCGGTCTGCAATTAGTCTCCATAAATACTTTGGGGCAATGCTTATTTTTTCAAACAGCATGCCTAGTTCATACCACGGACACTTCAATGCGTTGTCTACATTGGATAACAAATCTAAATAAATTGGCTCGTCGTTCATGCAATTTCCAACTCCCATGTTATTCATATGCATTGAGATCATTATACTGTTTAACACTGCGGGATAAGCAGAGTGATTTAGCCTTAATCGTCTCACGTTGCCCATTGTTCTCTGCGGGGAAATTCG…	AGGACGACCATTCAATGACCTATGTCCTGGTGTGTTCACTATCATTGGGATTTCAATGTTTGGTATGTGGTTTGCAATTTCACTCAACAAATTGTTGTTTTCATCTTCAAACATTTTGCATGCTGATTGTGACTCTCGGTCTGCAATTAGTCTCCATAAATACTTTGGGGCAATGCTTATTTTTTCAAACAGCATACCTAGTTCATACCACGGACACTTCAATGCGTTGTCTACATTGGATAACAAATCTAAATAAATTGGCTCGTCGTTCATGCAATTTCCAACTGCCATGTTATTCATATGCATTGAGATCATTATACTGTTTAACACTGCGGGATAAGCAGAGTGATTTAGCCTTAATCGTCTCACGTTGCCCATTGTTCTCTGCGGGGAAATTCG…	857	14714	KX977569.1 Bell pepper endornavirus isolate Penol, complete genome
TRINITY_DN998_c1_g1_i1	JQ951943.1	99.067	857	8	0	1	857	7086	6230	0	1510	JQ951943.1	1674	849	849	0	99.07	1	-1	AGGACGACCATTCAATGTCCTATGTCCTGGTGTGTTCACTATCATTGGGATTTCAATGTTTGGTATGTGGTTTGCAATTTCACTCAACAAATTGTTGTTTTCATCTTCAAACATTTTGCATGCTGATTGTGACTCTCGGTCTGCAATTAGTCTCCATAAATACTTTGGGGCAATGCTTATTTTTTCAAACAGCATGCCTAGTTCATACCACGGACACTTCAATGCGTTGTCTACATTGGATAACAAATCTAAATAAATTGGCTCGTCGTTCATGCAATTTCCAACTCCCATGTTATTCATATGCATTGAGATCATTATACTGTTTAACACTGCGGGATAAGCAGAGTGATTTAGCCTTAATCGTCTCACGTTGCCCATTGTTCTCTGCGGGGAAATTCG…	AGGACGACCATTCAATGACCTATGTCCTGGTGTGTTCACTATCATTGGGATTTCAATGTTTGGTATGTGGTTTGCAATTTCACTCAACAAATTGTTGTTTTCATCTTCAAACATTTTGCATGCTGATTGTGACTCTCGGTCTGCAATTAGTCTCCATAAATACTTTGGGGCAATGCTTATTTTTTCAAACAGCATACCTAGTTCATACCACGGACACTTCAATGCGTTGTCTACATTGGATAACAAATCTAAGTAAATTGGCTCGTCGTTCATGCAATTTCCAACTCCCATGTTATTCATATGCATTGAGATCATTATACTGTTTAACACTGCGGGATAAGCAGGGTGATTTAGCCTTAATCGTCTCACGTTGCCCATTGTTCTCTGCGGGGAAATTCG…	857	14727	JQ951943.1 Bell pepper endornavirus strain IS RNA-dependent RNA polymerase (RdRp) gene, complete cds
TRINITY_DN998_c1_g1_i1	NC_015781.2	97.083	857	25	0	1	857	7087	6231	0	1433	NC_015781.2	1588	832	832	0	97.08	1	-1	AGGACGACCATTCAATGTCCTATGTCCTGGTGTGTTCACTATCATTGGGATTTCAATGTTTGGTATGTGGTTTGCAATTTCACTCAACAAATTGTTGTTTTCATCTTCAAACATTTTGCATGCTGATTGTGACTCTCGGTCTGCAATTAGTCTCCATAAATACTTTGGGGCAATGCTTATTTTTTCAAACAGCATGCCTAGTTCATACCACGGACACTTCAATGCGTTGTCTACATTGGATAACAAATCTAAATAAATTGGCTCGTCGTTCATGCAATTTCCAACTCCCATGTTATTCATATGCATTGAGATCATTATACTGTTTAACACTGCGGGATAAGCAGAGTGATTTAGCCTTAATCGTCTCACGTTGCCCATTGTTCTCTGCGGGGAAATTCG…	AGGACGACCATTCAATGACCTATGTCCTGGTGTGTTCACTATCATTGGGATTTCAATGTTTGGTATGTGGTTTGCAATTTCACTCAACAAATTGTTGTTTTCATCTTCAAACATTTTGCATGCTGATTGTGACTCTCGGTCTGCAATTAGTCTCCATAAATACTTTGGGGCAATGCTTATTTTTTCAAACAGCATACCTAGTTCATACCACGGACACTTCAATGCGTTGTCTACATTGGATAACAAATCTAAATAAATTGGCTCGTCGTTCATGCAATTTCCAACTCCCATGTTATTCATATGCATTGAGATCATTATACTGTTTAACACTGCGGGATAAGCAGAGTGATTTAGCCTTAATCGTCTCACATTGCCCATTGTTCTCTGCGGGGAAATTCG…	857	14728	NC_015781.2 Bell pepper endornavirus, complete genome
TRINITY_DN998_c1_g1_i1	NC_027920.1	65.178	873	270	17	2	857	7083	6228	1.49e-37	158	NC_027920.1	174	569	569	34	65.18	1	-1	GGACGACCATTCAATGTCCTATGTCCTGGTGTGTTC-ACTATCATTGGGATTTCAATGTTTGGT--ATGT--GGTTTGCAATTTCACTCAACAAATTGTTGTTTTCATCTTCAAACATTTTGCATGCTGATTGTGACTCTCG-GTCTGCAATTAGTCTCCATAAATACTTTGGGGCAATGCTTATTTTTTCAAACAGCATGCCTAGTTCATACCACGGACACTTCAATGCGTTGTCTACATTGGATAACAAATCTAAATAAATTGGCTCGTCGTTCATGCAATTTCC------AACTCCCAT--GTTATTCATATGCATTG-AGATCATTATACTGTTTAACACTGCGGGATAAGCAGAGTGATTTAGCCTTAATCGTC-TCACGTTGCCCATTGTTCT…	GGACGACCCCTCAATGATCTGTGTCCTGGGGTGCTAGACTTTAAT-GGAATTTCGATATTTGGTGCATGCAAGGTT----AATTCTTTCAAGATTTCTTCGTTTTCATGTTCAAAAATGGTACATGCTGAGCTGGACTCTCCTGTTTGTAAT-AGTTTCCATAAATATTGTGGAGCCACGCTAATACGCTCCAATAACATTCCCAATTCAAACCAAGAACATTTTAAAGCTTCGTCCATCTCCGCTAATAAATCTACATAGAGTGGTTCATTAT-----CAATTTCTGCGTTTAATTCCACTACGCTA---ATATGCATGGCAGA-CATTATGCTTTGCAACAAAACTGGGTATGCAACACAATTTATT-TTGATCTTCCTGACATTTCCCACTTTACG…	857	14729	NC_027920.1 Hot pepper endornavirus isolate CS, complete genome
TRINITY_DN998_c2_g1_i1	AB597230.1	97.196	321	9	0	1	321	7733	8053	1.51e-152	538	AB597230.1	596	312	312	0	97.2	1	1	ACATGATGGAGATAATCGAGCATGCATATGGAGGTCGCAAGCTACCAGCAGAAACAAGTAAAGAGAAAGAGGGTAGTAATAGACAAGACATTATGGAATGCGTCAACCTGCAATTAACAGAGGGACGTGGACCTTGGTACACCAATCAAACCCAAGAGACAGCAGAAATTGTGACGAACAATGTGTTGATGGGATTAGTGCAGTGTCGATTAAGTCCATGCGAAATCGCAGAAATGATGACGAAGGCTAAAAAGAAGTGTGCTCACTTGATAATGCCACAAATGATAGAGCAAAACAATCAGCTATATGGAGTGGCAAGTG	ACATGATGGAGAAAATGGAGCATGCATATGGAGTTGGCAAGCAACCAGCAGAAACAAGTAAAGAGAAAGAGGGTAGTAATAGACAAGACATTATGGAATGCGTCAACCTGCAATTAACAGAGGGACGTGGACCTTGGTACACCAATCAAACCCAAGAGACAGCAGAAATTGTGACGAACAATGTGTTGATGGGATTAGTGCAGTGTCGATTAAGTCCATGCGAGATCGCAGAAATGATGACGAAGGCTAAAAAGAAGTGTGCTCACTTGATAATGCCACAAATGATAGAGCAAAACAATCAGCTTTTTGGAGTGGCTAGTG	321	14727	AB597230.1 Bell pepper endornavirus genomic RNA, complete genome, host: Capsicum annuum cv. Kyosuzu
TRINITY_DN998_c2_g1_i1	JQ951943.1	97.196	321	9	0	1	321	7733	8053	1.51e-152	538	JQ951943.1	596	312	312	0	97.2	1	1	ACATGATGGAGATAATCGAGCATGCATATGGAGGTCGCAAGCTACCAGCAGAAACAAGTAAAGAGAAAGAGGGTAGTAATAGACAAGACATTATGGAATGCGTCAACCTGCAATTAACAGAGGGACGTGGACCTTGGTACACCAATCAAACCCAAGAGACAGCAGAAATTGTGACGAACAATGTGTTGATGGGATTAGTGCAGTGTCGATTAAGTCCATGCGAAATCGCAGAAATGATGACGAAGGCTAAAAAGAAGTGTGCTCACTTGATAATGCCACAAATGATAGAGCAAAACAATCAGCTATATGGAGTGGCAAGTG	ACATGATGGAGAAAATGGAGCATGCATATGGAGTTGGCAAGCAACCAGCAGAAACAAGTAAAGAGAAAGAGGGTAGTAATAGACAAGACATTATGGAATGCGTCAACCTGCAATTAACAGAGGGACGTGGACCTTGGTACACCAATCAAACCCAAGAGACAGCAGAAATTGTGACGAACAATGTGTTGATGGGATTAGTGCAGTGTCGATTAAGTCCATGCGAGATCGCAGAAATGATGACGAAGGCTAAAAAGAAGTGTGCTCACTTGATAATGCCACAAATGATAGAGCAAAACAATCAGCTTTTTGGAGTGGCTAGTG	321	14727	JQ951943.1 Bell pepper endornavirus strain IS RNA-dependent RNA polymerase (RdRp) gene, complete cds
TRINITY_DN998_c2_g1_i1	KP455654.1	97.196	321	9	0	1	321	7673	7993	1.51e-152	538	KP455654.1	596	312	312	0	97.2	1	1	ACATGATGGAGATAATCGAGCATGCATATGGAGGTCGCAAGCTACCAGCAGAAACAAGTAAAGAGAAAGAGGGTAGTAATAGACAAGACATTATGGAATGCGTCAACCTGCAATTAACAGAGGGACGTGGACCTTGGTACACCAATCAAACCCAAGAGACAGCAGAAATTGTGACGAACAATGTGTTGATGGGATTAGTGCAGTGTCGATTAAGTCCATGCGAAATCGCAGAAATGATGACGAAGGCTAAAAAGAAGTGTGCTCACTTGATAATGCCACAAATGATAGAGCAAAACAATCAGCTATATGGAGTGGCAAGTG	ACATGATGGAGAAAATGGAGCATGCATATGGAGTTGGCAAGCAACCAGCAGAAACAAGTAAAGAGAAAGAGGGTAGTAATAGACAAGACATTATGGAATGCGTCAACCTGCAATTAACAGAGGGACGTGGACCTTGGTACACCAATCAAACCCAAGAGACAGCAGAAATTGTGACGAACAATGTGTTGATGGGATTAGTGCAGTGTCGATTAAGTCCATGCGAGATCGCAGAAATGATGACGAAGGCTAAAAAGAAGTGTGCTCACTTGATAATGCCACAAATGATAGAGCAAAACAATCAGCTTTTTGGAGTGGCTAGTG	321	14659	KP455654.1 Bell pepper endornavirus isolate Maor, complete genome
TRINITY_DN998_c2_g1_i1	KX525267.1	97.196	321	9	0	1	321	7737	8057	1.51e-152	538	KX525267.1	596	312	312	0	97.2	1	1	ACATGATGGAGATAATCGAGCATGCATATGGAGGTCGCAAGCTACCAGCAGAAACAAGTAAAGAGAAAGAGGGTAGTAATAGACAAGACATTATGGAATGCGTCAACCTGCAATTAACAGAGGGACGTGGACCTTGGTACACCAATCAAACCCAAGAGACAGCAGAAATTGTGACGAACAATGTGTTGATGGGATTAGTGCAGTGTCGATTAAGTCCATGCGAAATCGCAGAAATGATGACGAAGGCTAAAAAGAAGTGTGCTCACTTGATAATGCCACAAATGATAGAGCAAAACAATCAGCTATATGGAGTGGCAAGTG	ACATGATGGAGAAAATGGAGCATGCATATGGAGTTGGCAAGCAACCAGCAGAAACAAGTAAAGAGAAAGAGGGTAGTAATAGACAAGACATTATGGAATGCGTCAACCTGCAATTAACAGAGGGACGTGGACCTTGGTACACCAATCAAACCCAAGAGACAGCAGAAATTGTGACGAACAATGTGTTGATGGGATTAGTGCAGTGTCGATTAAGTCCATGCGAGATCGCAGAAATGATGACGAAGGCTAAAAAGAAGTGTGCTCACTTGATAATGCCACAAATGATAGAGCAAAACAATCAGCTTTTTGGAGTGGCTAGTG	321	14790	KX525267.1 Bell pepper endornavirus isolate DR Polyprotein gene, complete cds
TRINITY_DN998_c2_g1_i1	KT149366.1	96.885	321	10	0	1	321	7733	8053	1.84e-151	535	KT149366.1	592	311	311	0	96.88	1	1	ACATGATGGAGATAATCGAGCATGCATATGGAGGTCGCAAGCTACCAGCAGAAACAAGTAAAGAGAAAGAGGGTAGTAATAGACAAGACATTATGGAATGCGTCAACCTGCAATTAACAGAGGGACGTGGACCTTGGTACACCAATCAAACCCAAGAGACAGCAGAAATTGTGACGAACAATGTGTTGATGGGATTAGTGCAGTGTCGATTAAGTCCATGCGAAATCGCAGAAATGATGACGAAGGCTAAAAAGAAGTGTGCTCACTTGATAATGCCACAAATGATAGAGCAAAACAATCAGCTATATGGAGTGGCAAGTG	ACATGATGGAGAAAATGGAGCATGCATATGGAGTTGGCAAGCAACCAGCAGAAACAAGTAAAGAGAAAGAGGGTAGTAATAGACAAGACATTATGGAATGCGTCAACCTGCAATTGACAGAGGGACGTGGACCTTGGTACACCAATCAAACCCAAGAGACAGCAGAAATTGTGACGAACAATGTGTTGATGGGATTAGTGCAGTGTCGATTAAGTCCATGCGAGATCGCAGAAATGATGACGAAGGCTAAAAAGAAGTGTGCTCACTTGATAATGCCACAAATGATAGAGCAAAACAATCAGCTTTTTGGAGTGGCTAGTG	321	14726	KT149366.1 Bell pepper endornavirus, complete genome
TRINITY_DN998_c2_g1_i1	KX977568.1	95.639	321	14	0	1	321	7740	8060	4.92e-146	517	KX977568.1	572	307	307	0	95.64	1	1	ACATGATGGAGATAATCGAGCATGCATATGGAGGTCGCAAGCTACCAGCAGAAACAAGTAAAGAGAAAGAGGGTAGTAATAGACAAGACATTATGGAATGCGTCAACCTGCAATTAACAGAGGGACGTGGACCTTGGTACACCAATCAAACCCAAGAGACAGCAGAAATTGTGACGAACAATGTGTTGATGGGATTAGTGCAGTGTCGATTAAGTCCATGCGAAATCGCAGAAATGATGACGAAGGCTAAAAAGAAGTGTGCTCACTTGATAATGCCACAAATGATAGAGCAAAACAATCAGCTATATGGAGTGGCAAGTG	ACATGATGGAGAAAATGGAGCATGCATATGGAGTTGGCAAGCAACCAGCAGAAACAAGCAAAGAGAAAGAGGGTAGTACTAGACAAGACATTATGGAATGCGTCAACCTGCAATTAACAGAGGGAAGTGGACCTTGGTACACCAATCAAACCCAAGATACAGCAGAAATTGTGACGAACAATGTGTTGATGGGATTAGTGCAGTGTCGATTAAGTCCATGTGAGATCGCAGAAATGATGACGAAGGCTAAAAAGAAGTGTGCTCACTTGATAATGCCACAAATGATAGAGCAAAACAATCAGCTTTTTGGAGTGGCTAGTG	321	14727	KX977568.1 Bell pepper endornavirus isolate Santa Fe, complete genome
TRINITY_DN998_c2_g1_i1	KX977569.1	95.639	321	14	0	1	321	7734	8054	4.92e-146	517	KX977569.1	572	307	307	0	95.64	1	1	ACATGATGGAGATAATCGAGCATGCATATGGAGGTCGCAAGCTACCAGCAGAAACAAGTAAAGAGAAAGAGGGTAGTAATAGACAAGACATTATGGAATGCGTCAACCTGCAATTAACAGAGGGACGTGGACCTTGGTACACCAATCAAACCCAAGAGACAGCAGAAATTGTGACGAACAATGTGTTGATGGGATTAGTGCAGTGTCGATTAAGTCCATGCGAAATCGCAGAAATGATGACGAAGGCTAAAAAGAAGTGTGCTCACTTGATAATGCCACAAATGATAGAGCAAAACAATCAGCTATATGGAGTGGCAAGTG	ACATGATGGAGAAAATGGAGCATGCATATGGAGTTGGCAAGCAACCAGCAGAAACAAGCAAAGAGAAAGAGGGTAGTACTAGACAAGACATTATGGAATGCGTCAACCTGCAATTAACAGAGGGAAGTGGACCTTGGTACACCAATCAAACCCAAGATACAGCAGAAATTGTGACGAACAATGTGTTGATGGGATTAGTGCAGTGTCGATTAAGTCCATGTGAGATCGCAGAAATGATGACGAAGGCTAAAAAGAAGTGTGCTCACTTGATAATGCCACAAATGATAGAGCAAAACAATCAGCTTTTTGGAGTGGCTAGTG	321	14714	KX977569.1 Bell pepper endornavirus isolate Penol, complete genome
TRINITY_DN998_c2_g1_i1	NC_015781.2	84.424	321	50	0	1	321	7734	8054	3.55e-97	354	NC_015781.2	392	271	271	0	84.42	1	1	ACATGATGGAGATAATCGAGCATGCATATGGAGGTCGCAAGCTACCAGCAGAAACAAGTAAAGAGAAAGAGGGTAGTAATAGACAAGACATTATGGAATGCGTCAACCTGCAATTAACAGAGGGACGTGGACCTTGGTACACCAATCAAACCCAAGAGACAGCAGAAATTGTGACGAACAATGTGTTGATGGGATTAGTGCAGTGTCGATTAAGTCCATGCGAAATCGCAGAAATGATGACGAAGGCTAAAAAGAAGTGTGCTCACTTGATAATGCCACAAATGATAGAGCAAAACAATCAGCTATATGGAGTGGCAAGTG	ACATGATGGAAAAAATGGAGCATGCTTATGGAGCTGGGAAACAACCAGCAGAAACAAGCAAAGATAAAGAAGGCAACACTAGACAGGACATTATGGAATGTGTTAACCTGCAGATAACAGAGGGAAAAGGGCCTTGGTACACCAATCAAACGCAGGAGGCAGCAGAAATTGTGGCAAACAACGTGTTAATGGGATTGGTACAATGTAGATTGAATCCATGCGAGATTGCAGAAATGATGACAAAGGCCAAAAAGAAATGCGTTCACTTAATAATGCCACAAATGATAGAGCAGAACAATCAACTTTTTGGAGTGGCAAGTG	321	14728	NC_015781.2 Bell pepper endornavirus, complete genome
TRINITY_DN998_c2_g1_i1	NC_027920.1	68.846	260	81	0	60	319	7790	8049	1.02e-21	104	NC_027920.1	114	179	179	0	68.85	1	1	AAAGAGAAAGAGGGTAGTAATAGACAAGACATTATGGAATGCGTCAACCTGCAATTAACAGAGGGACGTGGACCTTGGTACACCAATCAAACCCAAGAGACAGCAGAAATTGTGACGAACAATGTGTTGATGGGATTAGTGCAGTGTCGATTAAGTCCATGCGAAATCGCAGAAATGATGACGAAGGCTAAAAAGAAGTGTGCTCACTTGATAATGCCACAAATGATAGAGCAAAACAATCAGCTATATGGAGTGGCAAG	AAAGAAAAGGATGGGAATGGCAAACAGGACATTTTGGAATGCATTGAGTTGCAACACAAGGAAGGCAGGGGACCATGGTTCACTAACCAAGCAGATGAAAGGGTGAAAATTATGTCCCAAAATGTGCTTATGGGACTGGTACAATGTCGTCTCAACCCACATGAATTAGCAGAATTAATGAAGAATGGAAACAAAACTTGTGTGCATATGATAATGCCACAAATGATAGAACGCAACAATCAATTATTTGGAGTGGCCAG	321	14729	NC_027920.1 Hot pepper endornavirus isolate CS, complete genome
TRINITY_DN1025_c0_g1_i1	NC_027823.1	68.632	475	143	2	143	614	1417	946	9.77e-45	181	NC_027823.1	200	326	326	6	68.63	1	-1	ACTAACGCCAATCCATTTGGATGAATTCCGTTGCTCTCTGAATGACAGAGAGTGGTGTTGTAACCACCACACGGCGTGAGATTCCTCCAGAATAGATGGCTGTTGGAGGGAAACATGCTGCCAGAGAAAACTCCGGAGCAGAAAGAGCAAGGTGTGTCTTCACAATAGTGATCCCGTCACGGGTTTCCACTAAAGCCATCTGCGCCTGAGAACCAAGCGCAGAGTTTCGAGTCATTTGACTTGAAGACATCTCAAAGAATTTTGCGTAAGTCACCGACTTACGCGCCCAGGCATCAGAAAGTGTCGTGAACAATTCTTTTGCGTTGAAGTCCCAAGACACGTGATCCGCTCTTGGGTTGGGCCAACTCAATCCCAACTGAGTCAGCACTTC---TGGAT…	ACTAACGCCAATCCATCTGAACGAATTCAGTGGCTCTCTGCTCGACAGAGAGGGGCGTAGTTACTACCACGCGGCGGGTCAGCCCACCAGTAAAGATAACTGATGCGGGGAAGCATGCCACGAGTGAGAACTCGGGGGCCGACAAACCAAGATGAGTCTTGACGACGGTCACACCATCACGGGTGTTAACACGTGCCATCTGAGATTGACTCCCAGCCGACACGTTACGTGTCATCTGACTCGACGACAACTCGAAGAACAGGGCGTAGGTTGTGGACCTACGAGCCCAGGCATCCGAAAGGCGAGTGAACACTTCTTTCGGGTTAAAAGTCCAATCCACGTGACCCGCAGATGGACGGTCCCAGCTAAGATCCAACTCAGCCAACACGCCAGATGCAC…	648	1574	NC_027823.1 Verticillium dahliae partitivirus 1 isolate Vd-253 segment RNA2, complete sequence
TRINITY_DN1025_c0_g1_i1	NC_010350.1	72.425	301	79	2	145	443	1411	1113	2.62e-39	163	NC_010350.1	180	218	218	4	72.43	1	-1	TAACGCCAATCCATTTGGATGAATTCCGTTGCTCTCTGAATGACAGAGAGTGGTGTTGTAACCACCACACGGCGTG--AGATTCCTCCAGAATAGATGGCTGTTGGAGGGAAACATGCTGCCAGAGAAAACTCCGGAGCAGAAAGAGCAAGGTGTGTCTTCACAATAGTGATCCCGTCACGGGTTTCCACTAAAGCCATCTGCGCCTGAGAACCAAGCGCAGAGTTTCGAGTCATTTGACTTGAAGACATCTCAAAGAATTTTGCGTAAGTCACCGACTTACGCGCCCAGGCATCAGAAAG	TAACGCCAATCCAATTGGACGAATTCAGTAGCTCTCTGTGTCACAGAGAGTGGTGTAGTAACTACCACACGACGAGGTAGAT--CACCAGAAAACACTGCTGTTGGTGGAAAACACGCAGCAAGAGAGAATTCTGGCGCAGACAAGGCAAGATGGGTCTTGACAACAGTAACACTGTCAGTCGTGCTGACGACGCACATTTGCGATTGAGAACCAACCGCAGCAGAACGATTCGTCATGCCAGACGCCATTTCAAAGAACGCGGCGTATGTCGTCGACATACGCGCCCAGGAGTCAGAGAG	648	1566	NC_010350.1 Botryotinia fuckeliana partitivirus 1, complete segment 2, genomic RNA
TRINITY_DN1025_c0_g1_i1	NC_010351.1	72.093	301	80	2	145	443	1198	900	3.19e-38	159	NC_010351.1	176	217	217	4	72.09	1	-1	TAACGCCAATCCATTTGGATGAATTCCGTTGCTCTCTGAATGACAGAGAGTGGTGTTGTAACCACCACACGGCGTG--AGATTCCTCCAGAATAGATGGCTGTTGGAGGGAAACATGCTGCCAGAGAAAACTCCGGAGCAGAAAGAGCAAGGTGTGTCTTCACAATAGTGATCCCGTCACGGGTTTCCACTAAAGCCATCTGCGCCTGAGAACCAAGCGCAGAGTTTCGAGTCATTTGACTTGAAGACATCTCAAAGAATTTTGCGTAAGTCACCGACTTACGCGCCCAGGCATCAGAAAG	TAACGCCAATCCAATTGGACGAATTCAGTAGCTCTCTGTGTCACAGAGAGTGGTGTAGTAACTACCACACGACGAGGTAGAT--CACCAGAAAACACTGCTGTTGGTGGAAAACACGCAGCAAGAGAGAATTCTGGCGCAGACAAGGCAAGATGGGTCTTGACAACAGTAACACTGTCAGTCGTGCTGACGACGCACATTTGCGATTAAGAACCAACCGCAGCAGAACGATTCGTCATGCCAGACGCCATTTCAAAGAACGCGGCGTATGTCGTCGACATACGCGCCCAGGAGTCAGAGAG	648	1383	NC_010351.1 Botryotinia fuckeliana partitivirus 1 RNA 3, complete sequence
TRINITY_DN1025_c0_g1_i1	NC_010351.1	80.328	61	9	3	4	63	1348	1290	0.000507	46.4	NC_010351.1	50	49	49	3	80.33	1	-1	TTCACACACCTTT-GTTAAAAGTATTGTGGCCTGATACACAGGACGGTCTCAGATAGACTG	TTCACTCACCTTTTGTTAAAAGAAGAGAG-CCTGATACACAGGTTTTTC-CAGATAGACTG	648	1383	NC_010351.1 Botryotinia fuckeliana partitivirus 1 RNA 3, complete sequence
TRINITY_DN1025_c0_g1_i1	KC422243.1	69.382	356	98	5	142	491	1422	1072	1.04e-31	138	KC422243.1	152	247	247	11	69.38	1	-1	GACTAACGCCAATCCATTTGGATGAATTCCGTTGCTCTCTGAATGACAGAGAGTGGTGTTGTAACCACCACACGGCGTGAGATTCCTCCAGAATAGATGGCTGTTGGA----GGGA-AACATGCTGCCAGAGAAAACTCCGGAGCAGAAAGAGCAAGGTGTGTCTTCACAATAGTGATCCCGTCACGGGTTTCCACTAAAGCCATCTGCGCCTGAGAACCAAGCGCAGA-GTTTCGAGTCATTTGACTTGAAGACATCTCAAAGAATTTTGCGTAAGTCACCGACTTACGCGCCCAGGCATCAGAAAGTGTCGTGAACAATTCTTTTGCGTTGAAGTCCCAAGACACGTGATCCGC	GACTAGCGCCAATCCATCTGAACGAATTCAGTGGCTCTCTGTTCGACAGAGAGGGGCGTGGTCACCACCACGCGACGAG----TCAGCCCGGTTCGATCACACTTCTATGCGGGGATAACATGCCACGAGCGAGAACTCGGGGGCTGACAAACCAAGATGAGTCTTGACGACGGTCACACCATCACGGGTGTTCACACGCGCCATCTGGGACTGACTCCCA-GCTGACACGTTACGCGTCATCTGACTCGACGACAACTCGAAGAATAGGGCGTAGGTTGTGGACCTACGTGCCCAGGCATCCGAAAGGCGAGTAAACACTTCTTTCGGGTCAAAAGTCCAGTCCACGTGACCCGC	648	1587	KC422243.1 Verticillium dahliae partitivirus 1 strain Vd08284 truncated coat protein (CP) gene, complete cds
TRINITY_DN1025_c0_g1_i1	KC422243.1	78.689	61	12	1	15	75	1540	1481	0.000145	48.2	KC422243.1	52	48	48	1	78.69	1	-1	TTGTTAAAAGTATTGTGGCCTGATACACAGGACGGTCTCAGATAGACTGAGATAGGGTGTC	TTGTTAAAAGGTTGGGTGCCTGATACACAGGAC-TTCTCCGATACACGGAGTCACGGTGTC	648	1587	KC422243.1 Verticillium dahliae partitivirus 1 strain Vd08284 truncated coat protein (CP) gene, complete cds
TRINITY_DN1025_c0_g1_i1	NC_002800.1	69.822	338	97	5	140	474	1413	1078	4.44e-30	132	NC_002800.1	146	236	236	5	69.82	1	-1	TTGACTAACGCCAATCCATTTGGATGAATTCCGTTGCTCTCTGAATGACAGAGAGTGGTGTTGTAACCACCACACGGCGTGAGATTCCTCCAGAATAGATGGCTGTTGGAGGGAAACATGCTGCCAGAGAAAACTCCGGAGCAGAAAGAGCAAGGTGTGTCTTCACAATAGTGATCCCGTC-ACGGGTTTCCACTAAAGCCATCTGCGCCTGAGAACCAAGCGCAGAGTTTCGAGTCATTTGACTTGAAGACATCTCAAAGAATTTTGCGTAAGTCACCGACTTAC-GCGCCCAGGCATCAGAAAGTGTCGTGAACAATTCTTTTGCGTTGAA-GTCC	TTGATTAACGCCAGTCCATCTGCACGAACTCGGTCGCTCTTTGTAACACAGAGAGCGGTGTCGTTACCACGACACGTCTTGACAAGTTGCCGGAGTAAACTCCGGAAGCAGGAAAACAAGCCACAAGCGAAAACTCGGGAGCAGAAAGAGCAAGGTGCGTCTTCACGACCGTCACACTATCTACTGAAGT-CACAACAGCCATCTGTGACTGCGAACCAGTCGCAGCACTCCTGTTCGACTGGCTGGATGACAACTCAAAGAACAGCGCATAAGT-AGCGCTTTTCTTCGCCCACTCGTCTGATAGTCTATTAAAGACTTCTTTCGCGTTGAACGTCC	648	1585	NC_002800.1 Discula destructiva virus 1 segment 2, complete genome
TRINITY_DN1025_c0_g1_i1	NC_003711.1	70.213	329	86	8	148	470	1424	1102	1.89e-28	127	NC_003711.1	140	231	231	12	70.21	1	-1	CGCCAATCCATTTGGATGAATTCCGTTGCTCTCTGAATGACAGAGAGTGGTGTTGTAACCACCACACGGCGTGA-GATTCCTCCAGAATAGATGGCTGTTGGAGGGAAACATGCTGCCAGAGAAAACTCCGGAGCAGAAAGAGCAAGGTGTGTCTTCACAATAGTGATCCCGTCACGGGTTTCC--ACTAAAGCCATCTGCGCCTGAGAACCA--AGC-GCAGAGTTTCGAGTCATTTGACTTGAAGACATCTCAAAGAATTTTGCGTAAGTCACCGACTTACGCGCCCAGGCATCAGAAAGTGTCGTGAACAATTCTTTTGCGTTGAA	CGCCAATCCATCTGAACGAACTCAGTTGCTCTCTGTCGAACAGAGAGTGGTGTTGTAACCACAACAC-GCCTGACCAACTCGCCGGAATACAGGCAAGATGCTGGAAAGCAAGCCACCAGAGAAAACTCCGGTGGAGACAGCGCCAACGCTGTCTTCACGACTGTTATTCCGTCA--GATTCACTGACAAGAGCCATCTGCGACTGAGAACCAGTAGCTGCCGTCCTGTTAGACA-GTGAC--GACGATAGCTCGAAGAACTTTGCATACGTCGTGCTCTTTCGAGCCCAATTATCCGAGAGACGGGTGAACGCTTCTCTAGCGTTGAA	648	1611	NC_003711.1 Discula destructiva virus 2 segment 2, complete genome
TRINITY_DN1025_c0_g1_i1	NC_003711.1	86.047	43	6	0	573	615	999	957	1.19e-05	51.8	NC_003711.1	56	37	37	0	86.05	1	-1	GGCATCACGGTACGATTTAAACAAGAAGTCATACTTGTCACGT	GGCATCGTTGTACGATTTAAACAGGAAGTCAAACCTGTCACGT	648	1611	NC_003711.1 Discula destructiva virus 2 segment 2, complete genome
TRINITY_DN1025_c0_g1_i1	AM040149.1	67.808	146	47	0	145	290	1415	1270	1.19e-05	51.8	AM040149.1	56	99	99	0	67.81	1	-1	TAACGCCAATCCATTTGGATGAATTCCGTTGCTCTCTGAATGACAGAGAGTGGTGTTGTAACCACCACACGGCGTGAGATTCCTCCAGAATAGATGGCTGTTGGAGGGAAACATGCTGCCAGAGAAAACTCCGGAGCAGAAAGAGC	TAACGCCAATCCATCTGGCAGAATTCAGTCGCGCGTTGAGACACACTAAGAGAAGTAGTTACCACTACACGCCTAGTAATGCCACCCACAAAGATACAACTCGGTGGGAAACACGCAGCGAGGGAGAATTCAGGTGCCGAAAGAGC	648	1581	AM040149.1 Penicillium stoloniferum virus S mRNA for capsid protein (cp gene)
TRINITY_DN1025_c0_g1_i1	NC_005977.2	67.808	146	47	0	145	290	1416	1271	1.19e-05	51.8	NC_005977.2	56	99	99	0	67.81	1	-1	TAACGCCAATCCATTTGGATGAATTCCGTTGCTCTCTGAATGACAGAGAGTGGTGTTGTAACCACCACACGGCGTGAGATTCCTCCAGAATAGATGGCTGTTGGAGGGAAACATGCTGCCAGAGAAAACTCCGGAGCAGAAAGAGC	TAACGCCAATCCATCTGGCAGAATTCAGTCGCGCGTTGAGACACACTAAGAGAAGTAGTTACCACTACACGCCTAGTAATGCCACCCACAAAGATACAACTCGGTGGGAAACACGCAGCGAGGGAGAATTCAGGTGCCGAAAGAGC	648	1582	NC_005977.2 Penicillium stoloniferum virus S segment 2, complete genome
TRINITY_DN1025_c1_g1_i1	NC_010350.1	82.258	62	11	0	237	298	855	916	3.03e-09	62.6	NC_010350.1	68	51	51	0	82.26	1	1	AACGTGCTTGAGGAAGCCGTTCTTTCTGGAAACGTGCCCGATGAGTGGGAGCTCATCAAACC	AACGTGCTTGAGGAAGCCGTTCTCAGTGGAACAGTTCCTGATGCTTGGGAGAGCATCAAACC	312	1566	NC_010350.1 Botryotinia fuckeliana partitivirus 1, complete segment 2, genomic RNA
TRINITY_DN1025_c1_g1_i1	NC_010351.1	80.645	62	12	0	237	298	642	703	3.69e-08	59	NC_010351.1	64	50	50	0	80.65	1	1	AACGTGCTTGAGGAAGCCGTTCTTTCTGGAAACGTGCCCGATGAGTGGGAGCTCATCAAACC	AACGTGCTTGAGGAAGCCGTTCTCAGTGGAACAGTTCCTGATGCTTAGGAGAGCATCAAACC	312	1383	NC_010351.1 Botryotinia fuckeliana partitivirus 1 RNA 3, complete sequence
TRINITY_DN1033_c0_g1_i1	KY606993.1	93.103	29	2	0	91	119	140	168	0.000505	44.6	KY606993.1	48	27	27	0	93.1	1	1	CTTATTTTCTGTAATTTTCTTTCTTGTAA	CTTCTTTTCTTTAATTTTCTTTCTTGTAA	203	3586	KY606993.1 Broad bean wilt virus 2 isolate Anhui segment RNA2 polyprotein gene, complete cds
TRINITY_DN1036_c0_g1_i1	KT149366.1	96.983	232	7	0	1	232	10885	10654	4.27e-107	387	KT149366.1	428	225	225	0	96.98	1	-1	GTTCTATCACCTCTATCCCTGATTGTTCTAATGGTGTGCTGGATGTGTCTTTCGGCGCACCATATGTGTATTCATACACGCGTTTGGGTGGTACTTGTGGTCTAGGTCCTCCCCTTCTCGTGTCTGCGCTACCTAATGGTGGCAGTTGGGCACTGCTACCAGTTTTCTCAAATTGTGGTTTGAAGTGCGATTTCAGAAGCAAGTTCGGTGTTAGCTCCGCTTCATACTGCCA	GTTCTATCACCTCTATCCCTGATTGTTCTAATGGTGTGCTGGATGTGTCTTTCGGCGCACCATATGTGTATTCATACACGCGTTTGGGTGGTACTTGTGGTCTAGGTCCTCCCCTTCTCGTGTCTGCGCTACCTAATGGTGGCAGTTGGGCACTGCTACCAGTTTTCTCAAATTGTGGTTTGAAGTGCGATTTCAGAATCAATTTCGTTGTTAGCGCCGCTTCCGACTCCCA	235	14726	KT149366.1 Bell pepper endornavirus, complete genome
TRINITY_DN1036_c0_g1_i1	KP455654.1	96.983	232	7	0	1	232	10825	10594	4.27e-107	387	KP455654.1	428	225	225	0	96.98	1	-1	GTTCTATCACCTCTATCCCTGATTGTTCTAATGGTGTGCTGGATGTGTCTTTCGGCGCACCATATGTGTATTCATACACGCGTTTGGGTGGTACTTGTGGTCTAGGTCCTCCCCTTCTCGTGTCTGCGCTACCTAATGGTGGCAGTTGGGCACTGCTACCAGTTTTCTCAAATTGTGGTTTGAAGTGCGATTTCAGAAGCAAGTTCGGTGTTAGCTCCGCTTCATACTGCCA	GTTCTATCACCTCTATCCCTGATTGTTCTAATGGTGTGCTGGATGTGTCTTTCGGCGCACCATATGTGTATTCATACACGCGTTTGGGTGGTACTTGTGGTCTAGGTCCTCCCCTTCTCGTGTCTGCGCTACCTAATGGTGGCAGTTGGGCACTGCTACCAGTTTTCTCAAATTGTGGTTTGAAGTGCGATTTCAGAATCAATTTCGTTGTTAGCGCCGCTTCCGACTCCCA	235	14659	KP455654.1 Bell pepper endornavirus isolate Maor, complete genome
TRINITY_DN1036_c0_g1_i1	KX525267.1	96.983	232	7	0	1	232	10889	10658	4.27e-107	387	KX525267.1	428	225	225	0	96.98	1	-1	GTTCTATCACCTCTATCCCTGATTGTTCTAATGGTGTGCTGGATGTGTCTTTCGGCGCACCATATGTGTATTCATACACGCGTTTGGGTGGTACTTGTGGTCTAGGTCCTCCCCTTCTCGTGTCTGCGCTACCTAATGGTGGCAGTTGGGCACTGCTACCAGTTTTCTCAAATTGTGGTTTGAAGTGCGATTTCAGAAGCAAGTTCGGTGTTAGCTCCGCTTCATACTGCCA	GTTCTATCACCTCTATCCCTGATTGTTCTAATGGTGTGCTGGATGTGTCTTTCGGCGCACCATATGTGTATTCATACACGCGTTTGGGTGGTACTTGTGGTCTAGGTCCTCCCCTTCTCGTGTCTGCGCTACCTAATGGTGGCAGTTGGGCACTGCTACCAGTTTTCTCAAATTGTGGTTTGAAGTGCGATTTCAGAATCAATTTCGTTGTTAGCGCCGCTTCCGACTCCCA	235	14790	KX525267.1 Bell pepper endornavirus isolate DR Polyprotein gene, complete cds
TRINITY_DN1036_c0_g1_i1	AB597230.1	96.552	232	8	0	1	232	10885	10654	5.21e-106	383	AB597230.1	424	224	224	0	96.55	1	-1	GTTCTATCACCTCTATCCCTGATTGTTCTAATGGTGTGCTGGATGTGTCTTTCGGCGCACCATATGTGTATTCATACACGCGTTTGGGTGGTACTTGTGGTCTAGGTCCTCCCCTTCTCGTGTCTGCGCTACCTAATGGTGGCAGTTGGGCACTGCTACCAGTTTTCTCAAATTGTGGTTTGAAGTGCGATTTCAGAAGCAAGTTCGGTGTTAGCTCCGCTTCATACTGCCA	GTTCTATCACCTCTATCCCTGATTGTTCTAATGGTGTGCTGGATGTGTCTTTCGGCACACCATATGTGTATTCATACACGCGTTTGGGTGGTACTTGTGGTCTAGGTCCTCCCCTTCTCGTGTCTGCGCTACCTAATGGTGGCAGTTGGGCACTGCTACCAGTTTTCTCAAATTGTGGTTTGAAGTGCGATTTCAGAATCAATTTCGTTGTTAGCGCCGCTTCCGACTCCCA	235	14727	AB597230.1 Bell pepper endornavirus genomic RNA, complete genome, host: Capsicum annuum cv. Kyosuzu
TRINITY_DN1036_c0_g1_i1	KX977568.1	96.552	232	8	0	1	232	10892	10661	5.21e-106	383	KX977568.1	424	224	224	0	96.55	1	-1	GTTCTATCACCTCTATCCCTGATTGTTCTAATGGTGTGCTGGATGTGTCTTTCGGCGCACCATATGTGTATTCATACACGCGTTTGGGTGGTACTTGTGGTCTAGGTCCTCCCCTTCTCGTGTCTGCGCTACCTAATGGTGGCAGTTGGGCACTGCTACCAGTTTTCTCAAATTGTGGTTTGAAGTGCGATTTCAGAAGCAAGTTCGGTGTTAGCTCCGCTTCATACTGCCA	GTTCTATCACCTCTATCCCTGATTGTTCTAATGGTGTGCTGGATGTGTCTTTCGGCGCACCATATGTGTATTCATACACGCGTTTGGGTGGTACTTGTGGTCTAGGTCCTCCCCTTCTCGTGTCTGCGCTACCTGATGGTGGCAGTTGGGCACTGCTACCAGTTTTCTCAAATTGTGGTTTGAAGTGCGATTTCAGAATCAATTTCGTTGTTAGCGCCGCTTCCGACTCCCA	235	14727	KX977568.1 Bell pepper endornavirus isolate Santa Fe, complete genome
TRINITY_DN1036_c0_g1_i1	KX977569.1	96.552	232	8	0	1	232	10886	10655	5.21e-106	383	KX977569.1	424	224	224	0	96.55	1	-1	GTTCTATCACCTCTATCCCTGATTGTTCTAATGGTGTGCTGGATGTGTCTTTCGGCGCACCATATGTGTATTCATACACGCGTTTGGGTGGTACTTGTGGTCTAGGTCCTCCCCTTCTCGTGTCTGCGCTACCTAATGGTGGCAGTTGGGCACTGCTACCAGTTTTCTCAAATTGTGGTTTGAAGTGCGATTTCAGAAGCAAGTTCGGTGTTAGCTCCGCTTCATACTGCCA	GTTCTATCACCTCTATCCCTGATTGTTCTAATGGTGTGCTGGATGTGTCTTTCGGCGCACCATATGTGTATTCATACACGCGTTTGGGTGGTACTTGTGGTCTAGGTCCTCCCCTTCTCGTGTCTGCGCTACCTGATGGTGGCAGTTGGGCACTGCTACCAGTTTTCTCAAATTGTGGTTTGAAGTGCGATTTCAGAATCAATTTCGTTGTTAGCGCCGCTTCCGACTCCCA	235	14714	KX977569.1 Bell pepper endornavirus isolate Penol, complete genome
TRINITY_DN1036_c0_g1_i1	JQ951943.1	96.121	232	9	0	1	232	10885	10654	2.21e-104	378	JQ951943.1	418	223	223	0	96.12	1	-1	GTTCTATCACCTCTATCCCTGATTGTTCTAATGGTGTGCTGGATGTGTCTTTCGGCGCACCATATGTGTATTCATACACGCGTTTGGGTGGTACTTGTGGTCTAGGTCCTCCCCTTCTCGTGTCTGCGCTACCTAATGGTGGCAGTTGGGCACTGCTACCAGTTTTCTCAAATTGTGGTTTGAAGTGCGATTTCAGAAGCAAGTTCGGTGTTAGCTCCGCTTCATACTGCCA	GTTCTATCACCTGTATCCCTGATTGTTCTAATGGTGTGCTGGATGTGTCTTTCGGCGCACCATATGTGTATTGATACACGCGTTTGGGTGGTACTTGTGGTCTAGGTCCTCCCCTTCTCGTGTCTGCGCTACCTAATGGTGGCAGTTGGGCACTGCTACCAGTTTTCTCAAATTGTGGTTTGAAGTGCGATTTCAGAATCAATTTCGTTGTTAGCGCCGCTTCCGACTCCCA	235	14727	JQ951943.1 Bell pepper endornavirus strain IS RNA-dependent RNA polymerase (RdRp) gene, complete cds
TRINITY_DN1036_c0_g1_i1	NC_015781.2	80.435	230	45	0	3	232	10884	10655	1.95e-54	212	NC_015781.2	234	185	185	0	80.43	1	-1	TCTATCACCTCTATCCCTGATTGTTCTAATGGTGTGCTGGATGTGTCTTTCGGCGCACCATATGTGTATTCATACACGCGTTTGGGTGGTACTTGTGGTCTAGGTCCTCCCCTTCTCGTGTCTGCGCTACCTAATGGTGGCAGTTGGGCACTGCTACCAGTTTTCTCAAATTGTGGTTTGAAGTGCGATTTCAGAAGCAAGTTCGGTGTTAGCTCCGCTTCATACTGCCA	TCTATCACCTCTATTCCAGATTGTTCTAATGGCATGCTGGATGCGTCTTTGGGTGCACCATATGTGTACTCATACACGCGTTTGGGTGGTGCTTGTGGTCTAGGTTGTTCTTTCCTCGTATTTGTTCTGCCTAATGATGGCTGTTGTGTACTTTCACCAGACTTTTCAAGTTGTGGTTTGAAGTGAGATTTGAGAATTAACTTTGTCGTTAGTGACGCTTCTGACTCCCA	235	14728	NC_015781.2 Bell pepper endornavirus, complete genome
TRINITY_DN1036_c1_g1_i1	KP455654.1	99.789	475	1	0	2	476	11299	10825	0	852	KP455654.1	944	474	474	0	99.79	1	-1	GGCTTTTTGGTGCTAGCAACAATCTGGTTCTGCCAGGAGTTACAACTTCCATTGGGGGTCCCCAATCAGTTACTGGATTGAGTTCAAACATATTCAATAATAACATCGAGTTGCTGGTCAGCTCATTTGTTGCATCTACTGAAAATTGGATTTCTGGTGGACCCACCGTCTCTGGCATTGGCACATCTTCCACAACTTGTGTTGGCTCAGGTGGTGGTTGTTCAACACTAAAGCCCTCGGCATAATCTATTTCATCAGGTTCTGGTGGCTGCAAATCCATTTCAACATTATCATCATCCTTAGAAGAATTTGAATCGTCGTTGTTGTCAGTGGTTTGTGACGAGCTGTCTATTAGTTCAATTGGTACCTCTTCTGTTGTGGCCGCTACATCACTGAGCA…	GGCTTTTTGGTGCTAGCAACAATCTGGTTCTGCCAGGAGTTACAACTTCCATTGGGGGTCCCCAATCAGTTACTGGATTGAGTTCAAACATATTCAATAATAACATCGAGTTGCTGGTCAGCTCATTTGTTGCATCTACTGAAAATTGGATTTCTGGTGGACCCACCGTCTCTGGCATTGGCACATCTTCCACAACTTGTGTTGGCTCAGGTGGTGGTTGTTCAACACTAAAGCCCTCGGCATAATCTATTTCATCAGGTTCTGGTGGCTGCAAATCCATTTCAACATTATCATCCTCCTTAGAAGAATTTGAATCGTCGTTGTTGTCAGTGGTTTGTGACGAGCTGTCTATTAGTTCAATTGGTACCTCTTCTGTTGTGGCCGCTACATCACTGAGCA…	476	14659	KP455654.1 Bell pepper endornavirus isolate Maor, complete genome
TRINITY_DN1036_c1_g1_i1	KX525267.1	99.579	475	2	0	2	476	11363	10889	0	848	KX525267.1	940	473	473	0	99.58	1	-1	GGCTTTTTGGTGCTAGCAACAATCTGGTTCTGCCAGGAGTTACAACTTCCATTGGGGGTCCCCAATCAGTTACTGGATTGAGTTCAAACATATTCAATAATAACATCGAGTTGCTGGTCAGCTCATTTGTTGCATCTACTGAAAATTGGATTTCTGGTGGACCCACCGTCTCTGGCATTGGCACATCTTCCACAACTTGTGTTGGCTCAGGTGGTGGTTGTTCAACACTAAAGCCCTCGGCATAATCTATTTCATCAGGTTCTGGTGGCTGCAAATCCATTTCAACATTATCATCATCCTTAGAAGAATTTGAATCGTCGTTGTTGTCAGTGGTTTGTGACGAGCTGTCTATTAGTTCAATTGGTACCTCTTCTGTTGTGGCCGCTACATCACTGAGCA…	GGCTTTTTGGTGCTAGCAACAATCTGGTTCTGCCAGGAGTTACAACTTCCATTGGGGGTCCCCAATCAGTTACTGGATTGAGTTCAAACATATTCAATAATAACATCGAGTTGCTGGTCAGCTCATTTGTTGCATCTACTGAAAATTGGATTTCTGGTGGACCCACCGTCTCTGGCATTGGCACATCTTCCACAACTTGTGTTGGCTCAGGTGGTGGTTGTTCAATACTAAAGCCCTCGGCATAATCTATTTCATCAGGTTCTGGTGGCTGCAAATCCATTTCAACATTATCATCCTCCTTAGAAGAATTTGAATCGTCGTTGTTGTCAGTGGTTTGTGACGAGCTGTCTATTAGTTCAATTGGTACCTCTTCTGTTGTGGCCGCTACATCACTGAGCA…	476	14790	KX525267.1 Bell pepper endornavirus isolate DR Polyprotein gene, complete cds
TRINITY_DN1036_c1_g1_i1	KX977568.1	99.158	475	4	0	2	476	11366	10892	0	839	KX977568.1	930	471	471	0	99.16	1	-1	GGCTTTTTGGTGCTAGCAACAATCTGGTTCTGCCAGGAGTTACAACTTCCATTGGGGGTCCCCAATCAGTTACTGGATTGAGTTCAAACATATTCAATAATAACATCGAGTTGCTGGTCAGCTCATTTGTTGCATCTACTGAAAATTGGATTTCTGGTGGACCCACCGTCTCTGGCATTGGCACATCTTCCACAACTTGTGTTGGCTCAGGTGGTGGTTGTTCAACACTAAAGCCCTCGGCATAATCTATTTCATCAGGTTCTGGTGGCTGCAAATCCATTTCAACATTATCATCATCCTTAGAAGAATTTGAATCGTCGTTGTTGTCAGTGGTTTGTGACGAGCTGTCTATTAGTTCAATTGGTACCTCTTCTGTTGTGGCCGCTACATCACTGAGCA…	GGCTTTTTGGTGCTAGCAACAATCTGGTTCTGCCAGGAGTTACAACTTCCATTGGGGGTCCCCAATCAGTTACTGGATTGAGTTCAAACATATTCAATAATAACATCGAGTTGCTGGTCAGCTCATTTGTTGCATCTACTGAAAATTGGATTTCTGGTGGACCCACCGTCTCTGGCATTGGCACATCTTCCACAACTTGTGTTGGCTCAGGTGGTGGTTGTTCAACACTAAAGCCCTCGGCATAATCTATTTCATCAGGTTCTGGTGGCTGCAAGTCCATTTCAACATTATCATCCTCCTTAGAAGAATTTGAATCGTCGTTGTTGTCGGTGGTTTGTGACGAGCTGTCTATTAGTTCAATTGGTACCTCTTCTGTTGTGGCCGCTACATCACTGAGCA…	476	14727	KX977568.1 Bell pepper endornavirus isolate Santa Fe, complete genome
TRINITY_DN1036_c1_g1_i1	KX977569.1	99.158	475	4	0	2	476	11360	10886	0	839	KX977569.1	930	471	471	0	99.16	1	-1	GGCTTTTTGGTGCTAGCAACAATCTGGTTCTGCCAGGAGTTACAACTTCCATTGGGGGTCCCCAATCAGTTACTGGATTGAGTTCAAACATATTCAATAATAACATCGAGTTGCTGGTCAGCTCATTTGTTGCATCTACTGAAAATTGGATTTCTGGTGGACCCACCGTCTCTGGCATTGGCACATCTTCCACAACTTGTGTTGGCTCAGGTGGTGGTTGTTCAACACTAAAGCCCTCGGCATAATCTATTTCATCAGGTTCTGGTGGCTGCAAATCCATTTCAACATTATCATCATCCTTAGAAGAATTTGAATCGTCGTTGTTGTCAGTGGTTTGTGACGAGCTGTCTATTAGTTCAATTGGTACCTCTTCTGTTGTGGCCGCTACATCACTGAGCA…	GGCTTTTTGGTGCTAGCAACAATCTGGTTCTGCCAGGAGTTACAACTTCCATTGGGGGTCCCCAATCAGTTACTGGATTGAGTTCAAACATATTCAATAATAACATCGAGTTGCTGGTCAGCTCATTTGTTGCATCTACTGAAAATTGGATTTCTGGTGGACCCACCGTCTCTGGCATTGGCACATCTTCCACAACTTGTGTTGGCTCAGGTGGTGGTTGTTCAACACTAAAGCCCTCGGCATAATCTATTTCATCAGGTTCTGGTGGCTGCAAGTCCATTTCAACATTATCATCCTCCTTAGAAGAATTTGAATCGTCGTTGTTGTCGGTGGTTTGTGACGAGCTGTCTATTAGTTCAATTGGTACCTCTTCTGTTGTGGCCGCTACATCACTGAGCA…	476	14714	KX977569.1 Bell pepper endornavirus isolate Penol, complete genome
TRINITY_DN1036_c1_g1_i1	JQ951943.1	98.947	475	5	0	2	476	11359	10885	0	834	JQ951943.1	924	470	470	0	98.95	1	-1	GGCTTTTTGGTGCTAGCAACAATCTGGTTCTGCCAGGAGTTACAACTTCCATTGGGGGTCCCCAATCAGTTACTGGATTGAGTTCAAACATATTCAATAATAACATCGAGTTGCTGGTCAGCTCATTTGTTGCATCTACTGAAAATTGGATTTCTGGTGGACCCACCGTCTCTGGCATTGGCACATCTTCCACAACTTGTGTTGGCTCAGGTGGTGGTTGTTCAACACTAAAGCCCTCGGCATAATCTATTTCATCAGGTTCTGGTGGCTGCAAATCCATTTCAACATTATCATCATCCTTAGAAGAATTTGAATCGTCGTTGTTGTCAGTGGTTTGTGACGAGCTGTCTATTAGTTCAATTGGTACCTCTTCTGTTGTGGCCGCTACATCACTGAGCA…	GGCTTTTTGGTGCTAGCAACAATCTGGTTCTGCCAGGAGTTACAACTTCCATTGGGGGTCCCCAATCAGTTACTGGATTGAGTTCAAACATATTCAATAATAACTTCGAGTTGCTGGTCAGCTCATTTGTTGCATCTACTGAAAATTGAATTTCTGGTGGACCCACCGTCTCTGGCATTGGCACATCTTCCACAACTTGTGTTGGCTCAGGTGGTGGTTGTTCAACACTAAAGCCCTCGGCATAATCTATTTCATCAGGTTCTGGTGGCTGCAAATCCATTTCAACATTATCATCCTCCTTAGAAGAATTTGAATCGTCGTTGTTGTCGGTGGTTTGTGACGAGCTGTCTATTAGTTCAATTGGTACCTCTTCTGTTGTGGCCGCTACATCACTGAGCA…	476	14727	JQ951943.1 Bell pepper endornavirus strain IS RNA-dependent RNA polymerase (RdRp) gene, complete cds
TRINITY_DN1036_c1_g1_i1	AB597230.1	98.737	475	6	0	2	476	11359	10885	0	830	AB597230.1	920	469	469	0	98.74	1	-1	GGCTTTTTGGTGCTAGCAACAATCTGGTTCTGCCAGGAGTTACAACTTCCATTGGGGGTCCCCAATCAGTTACTGGATTGAGTTCAAACATATTCAATAATAACATCGAGTTGCTGGTCAGCTCATTTGTTGCATCTACTGAAAATTGGATTTCTGGTGGACCCACCGTCTCTGGCATTGGCACATCTTCCACAACTTGTGTTGGCTCAGGTGGTGGTTGTTCAACACTAAAGCCCTCGGCATAATCTATTTCATCAGGTTCTGGTGGCTGCAAATCCATTTCAACATTATCATCATCCTTAGAAGAATTTGAATCGTCGTTGTTGTCAGTGGTTTGTGACGAGCTGTCTATTAGTTCAATTGGTACCTCTTCTGTTGTGGCCGCTACATCACTGAGCA…	GGCTTTTTGGTGCTAGCAACAATCTGGTTCTGCCAGGAGTTACAACTTCCATTGGGGGTCCCCAATCAGTTACTGGATTGAGTTCAAACATATTCAATAATAACATCGAGTTGCTGGTCAGCTCATTTGTTGCATCTACTGAGAATTGAATTTCTGGTGGACCCACCGTCTCTGGCATTGGCACATCTTCCACAACTTGTGTTGGCTCAGGTGGTGGTTGTTCAACACTAAAGCCCTCGGCATAATCTATTTCATCAGGTTCTGGTGGCTGCAAATCCATTTCAACATCATCATCCTCCTTAGAAGAATTTGAATCGTCGTTGTTGTCGGTGGTTTGTGACGAGCTGTCTATTAGTTCAATTGGTACCTCTTCTGTTGTGGCCGCTACATCACTGAGCA…	476	14727	AB597230.1 Bell pepper endornavirus genomic RNA, complete genome, host: Capsicum annuum cv. Kyosuzu
TRINITY_DN1036_c1_g1_i1	KT149366.1	98.737	475	6	0	2	476	11359	10885	0	830	KT149366.1	920	469	469	0	98.74	1	-1	GGCTTTTTGGTGCTAGCAACAATCTGGTTCTGCCAGGAGTTACAACTTCCATTGGGGGTCCCCAATCAGTTACTGGATTGAGTTCAAACATATTCAATAATAACATCGAGTTGCTGGTCAGCTCATTTGTTGCATCTACTGAAAATTGGATTTCTGGTGGACCCACCGTCTCTGGCATTGGCACATCTTCCACAACTTGTGTTGGCTCAGGTGGTGGTTGTTCAACACTAAAGCCCTCGGCATAATCTATTTCATCAGGTTCTGGTGGCTGCAAATCCATTTCAACATTATCATCATCCTTAGAAGAATTTGAATCGTCGTTGTTGTCAGTGGTTTGTGACGAGCTGTCTATTAGTTCAATTGGTACCTCTTCTGTTGTGGCCGCTACATCACTGAGCA…	GGCTTTTTGGTGCTAGCAACAATCTGGTTCTGCCAGGAATTACAACTTCCATTGGGGGTCCCCAATCAGTTACTGGATTGAGTTCAAACATATTCAATAATAACTTCGAGTTGCTGGTCAGCTCATTTGTTGCATCTACTGAAAATTGAATTTCTGGTGGACCCACCGTCTCTGGCATTGGCACATCTTCCACAACTTGTGTTGGCTCAGGTGGTGGTTGTTCAACACTAAAGCCCTCGGCATAATCTATTTCATCAGGTTCTGGTGGCTGCAAATCCATTTCAACATTATCATCCTCCTTAGAAGAATTTGAATCGTCGTTGTTGTCGGTGGTTTGTGACGAGCTGTCTATTAGTTCAATTGGTACCTCTTCTGTTGTGGCCGCTACATCACTGAGCA…	476	14726	KT149366.1 Bell pepper endornavirus, complete genome
TRINITY_DN1036_c1_g1_i1	NC_015781.2	73.069	479	121	4	2	476	11360	10886	5.09e-72	271	NC_015781.2	300	350	350	8	73.07	1	-1	GGCTTTTTGGTGCTAGCAACAATCTGGTTCTGCCAGGAGTTACAACTTCCATTGGGGGTCCCCAATCAGTTACTGGATTGAGTTCAAACATATTCAATAATAACATCGAGTTGCTGGTCAGCTCATTTGTTGCATCTACTGAAAATTGGATTTCTGGTGGACCCACCGTCTCTGGCATTGGCACATCTTCCACAACTTGTGTTGGCTCAGGTGGTGGTTGTT---CAACACTAAAGCCCTCGGCATAATCTATTTCATCAGGTTCTGGTGGCTGCAAATCCATTTCAACATTATCATCATCCTTAGAAGAATTTGAATCGTCGTTGTTGTCAGTGGTTTGTGACGAGCTGTCTATTAGTTCAATTGGTACCTCTTCTGTTGTGGCCGCTACATCACTGA…	GGCTTTTTGGCGCTAGCAACAGTCTAGTTCTGCCGGGAGTCACCACCTCCATTGGTGGTCCCCAGTCAGTTATTGGGTTGAGTTCAAACATGTTTAACATTAACATGGGGTTGCTGGTCATTTCATTTGTTTCGTCTATCGAAAATGGAATTTCTGGCAGACTTGTTGTCTCTGGCATTGGTACCTCTTTCTCAACTTGTATTATTTCAAGTGGGTCTTGATTAGCAGCGCTA---CTCCCTGCTTGCTCTGCATCGTCAAGTTCTTGAGTTTGGACATCTGTCACGACATCATTGTTTGCTGCAGAAACATTCGAGTCCTCTTTATTTTCGGAGAGTTCCGAAGAGTTGTCTGTTAAATCAATCGGAGCTTCTTCTGTCGTTGTTGCTACGTCACTAA…	476	14728	NC_015781.2 Bell pepper endornavirus, complete genome
TRINITY_DN1036_c1_g2_i1	KP455654.1	99.368	475	3	0	2	476	11299	10825	0	843	KP455654.1	934	472	472	0	99.37	1	-1	GGCTTTTTGGTGCTAGCAACAATCTGGTTCTGCCAGGAGTTACAACTTCCATTGGGGGTCCCCAATCAGTTACTGGATTGAGTTCAAACATATTCAATAATAACATCGAGTTGCTGGTCAGCTCATTTGTTGCATCTACTGAAAATTGGATTTCTGGTGGACCCACCGTCTCTGGCATTGGCACATCTTCCACAACTTGTGTTGGCTCAGGTGGTGGTTGTTCAACACTAAAGCCCTCGGCATAATCTATTTCATCAGGTTCTGGTGGCTGCAAATCCATTTCAACATTATCATCATCCTTAGAAGAATTTGAATCGTCGTTGTTGTCGGTAGTTTGTGACGAGCTGTCTATTAGTTCAATTGGTACCTCTTCTGTTGTGGCCGCTACATCACTGAGCA…	GGCTTTTTGGTGCTAGCAACAATCTGGTTCTGCCAGGAGTTACAACTTCCATTGGGGGTCCCCAATCAGTTACTGGATTGAGTTCAAACATATTCAATAATAACATCGAGTTGCTGGTCAGCTCATTTGTTGCATCTACTGAAAATTGGATTTCTGGTGGACCCACCGTCTCTGGCATTGGCACATCTTCCACAACTTGTGTTGGCTCAGGTGGTGGTTGTTCAACACTAAAGCCCTCGGCATAATCTATTTCATCAGGTTCTGGTGGCTGCAAATCCATTTCAACATTATCATCCTCCTTAGAAGAATTTGAATCGTCGTTGTTGTCAGTGGTTTGTGACGAGCTGTCTATTAGTTCAATTGGTACCTCTTCTGTTGTGGCCGCTACATCACTGAGCA…	476	14659	KP455654.1 Bell pepper endornavirus isolate Maor, complete genome
TRINITY_DN1036_c1_g2_i1	KX977568.1	99.158	475	4	0	2	476	11366	10892	0	839	KX977568.1	930	471	471	0	99.16	1	-1	GGCTTTTTGGTGCTAGCAACAATCTGGTTCTGCCAGGAGTTACAACTTCCATTGGGGGTCCCCAATCAGTTACTGGATTGAGTTCAAACATATTCAATAATAACATCGAGTTGCTGGTCAGCTCATTTGTTGCATCTACTGAAAATTGGATTTCTGGTGGACCCACCGTCTCTGGCATTGGCACATCTTCCACAACTTGTGTTGGCTCAGGTGGTGGTTGTTCAACACTAAAGCCCTCGGCATAATCTATTTCATCAGGTTCTGGTGGCTGCAAATCCATTTCAACATTATCATCATCCTTAGAAGAATTTGAATCGTCGTTGTTGTCGGTAGTTTGTGACGAGCTGTCTATTAGTTCAATTGGTACCTCTTCTGTTGTGGCCGCTACATCACTGAGCA…	GGCTTTTTGGTGCTAGCAACAATCTGGTTCTGCCAGGAGTTACAACTTCCATTGGGGGTCCCCAATCAGTTACTGGATTGAGTTCAAACATATTCAATAATAACATCGAGTTGCTGGTCAGCTCATTTGTTGCATCTACTGAAAATTGGATTTCTGGTGGACCCACCGTCTCTGGCATTGGCACATCTTCCACAACTTGTGTTGGCTCAGGTGGTGGTTGTTCAACACTAAAGCCCTCGGCATAATCTATTTCATCAGGTTCTGGTGGCTGCAAGTCCATTTCAACATTATCATCCTCCTTAGAAGAATTTGAATCGTCGTTGTTGTCGGTGGTTTGTGACGAGCTGTCTATTAGTTCAATTGGTACCTCTTCTGTTGTGGCCGCTACATCACTGAGCA…	476	14727	KX977568.1 Bell pepper endornavirus isolate Santa Fe, complete genome
TRINITY_DN1036_c1_g2_i1	KX977569.1	99.158	475	4	0	2	476	11360	10886	0	839	KX977569.1	930	471	471	0	99.16	1	-1	GGCTTTTTGGTGCTAGCAACAATCTGGTTCTGCCAGGAGTTACAACTTCCATTGGGGGTCCCCAATCAGTTACTGGATTGAGTTCAAACATATTCAATAATAACATCGAGTTGCTGGTCAGCTCATTTGTTGCATCTACTGAAAATTGGATTTCTGGTGGACCCACCGTCTCTGGCATTGGCACATCTTCCACAACTTGTGTTGGCTCAGGTGGTGGTTGTTCAACACTAAAGCCCTCGGCATAATCTATTTCATCAGGTTCTGGTGGCTGCAAATCCATTTCAACATTATCATCATCCTTAGAAGAATTTGAATCGTCGTTGTTGTCGGTAGTTTGTGACGAGCTGTCTATTAGTTCAATTGGTACCTCTTCTGTTGTGGCCGCTACATCACTGAGCA…	GGCTTTTTGGTGCTAGCAACAATCTGGTTCTGCCAGGAGTTACAACTTCCATTGGGGGTCCCCAATCAGTTACTGGATTGAGTTCAAACATATTCAATAATAACATCGAGTTGCTGGTCAGCTCATTTGTTGCATCTACTGAAAATTGGATTTCTGGTGGACCCACCGTCTCTGGCATTGGCACATCTTCCACAACTTGTGTTGGCTCAGGTGGTGGTTGTTCAACACTAAAGCCCTCGGCATAATCTATTTCATCAGGTTCTGGTGGCTGCAAGTCCATTTCAACATTATCATCCTCCTTAGAAGAATTTGAATCGTCGTTGTTGTCGGTGGTTTGTGACGAGCTGTCTATTAGTTCAATTGGTACCTCTTCTGTTGTGGCCGCTACATCACTGAGCA…	476	14714	KX977569.1 Bell pepper endornavirus isolate Penol, complete genome
TRINITY_DN1036_c1_g2_i1	KX525267.1	99.158	475	4	0	2	476	11363	10889	0	839	KX525267.1	930	471	471	0	99.16	1	-1	GGCTTTTTGGTGCTAGCAACAATCTGGTTCTGCCAGGAGTTACAACTTCCATTGGGGGTCCCCAATCAGTTACTGGATTGAGTTCAAACATATTCAATAATAACATCGAGTTGCTGGTCAGCTCATTTGTTGCATCTACTGAAAATTGGATTTCTGGTGGACCCACCGTCTCTGGCATTGGCACATCTTCCACAACTTGTGTTGGCTCAGGTGGTGGTTGTTCAACACTAAAGCCCTCGGCATAATCTATTTCATCAGGTTCTGGTGGCTGCAAATCCATTTCAACATTATCATCATCCTTAGAAGAATTTGAATCGTCGTTGTTGTCGGTAGTTTGTGACGAGCTGTCTATTAGTTCAATTGGTACCTCTTCTGTTGTGGCCGCTACATCACTGAGCA…	GGCTTTTTGGTGCTAGCAACAATCTGGTTCTGCCAGGAGTTACAACTTCCATTGGGGGTCCCCAATCAGTTACTGGATTGAGTTCAAACATATTCAATAATAACATCGAGTTGCTGGTCAGCTCATTTGTTGCATCTACTGAAAATTGGATTTCTGGTGGACCCACCGTCTCTGGCATTGGCACATCTTCCACAACTTGTGTTGGCTCAGGTGGTGGTTGTTCAATACTAAAGCCCTCGGCATAATCTATTTCATCAGGTTCTGGTGGCTGCAAATCCATTTCAACATTATCATCCTCCTTAGAAGAATTTGAATCGTCGTTGTTGTCAGTGGTTTGTGACGAGCTGTCTATTAGTTCAATTGGTACCTCTTCTGTTGTGGCCGCTACATCACTGAGCA…	476	14790	KX525267.1 Bell pepper endornavirus isolate DR Polyprotein gene, complete cds
TRINITY_DN1036_c1_g2_i1	JQ951943.1	98.947	475	5	0	2	476	11359	10885	0	834	JQ951943.1	924	470	470	0	98.95	1	-1	GGCTTTTTGGTGCTAGCAACAATCTGGTTCTGCCAGGAGTTACAACTTCCATTGGGGGTCCCCAATCAGTTACTGGATTGAGTTCAAACATATTCAATAATAACATCGAGTTGCTGGTCAGCTCATTTGTTGCATCTACTGAAAATTGGATTTCTGGTGGACCCACCGTCTCTGGCATTGGCACATCTTCCACAACTTGTGTTGGCTCAGGTGGTGGTTGTTCAACACTAAAGCCCTCGGCATAATCTATTTCATCAGGTTCTGGTGGCTGCAAATCCATTTCAACATTATCATCATCCTTAGAAGAATTTGAATCGTCGTTGTTGTCGGTAGTTTGTGACGAGCTGTCTATTAGTTCAATTGGTACCTCTTCTGTTGTGGCCGCTACATCACTGAGCA…	GGCTTTTTGGTGCTAGCAACAATCTGGTTCTGCCAGGAGTTACAACTTCCATTGGGGGTCCCCAATCAGTTACTGGATTGAGTTCAAACATATTCAATAATAACTTCGAGTTGCTGGTCAGCTCATTTGTTGCATCTACTGAAAATTGAATTTCTGGTGGACCCACCGTCTCTGGCATTGGCACATCTTCCACAACTTGTGTTGGCTCAGGTGGTGGTTGTTCAACACTAAAGCCCTCGGCATAATCTATTTCATCAGGTTCTGGTGGCTGCAAATCCATTTCAACATTATCATCCTCCTTAGAAGAATTTGAATCGTCGTTGTTGTCGGTGGTTTGTGACGAGCTGTCTATTAGTTCAATTGGTACCTCTTCTGTTGTGGCCGCTACATCACTGAGCA…	476	14727	JQ951943.1 Bell pepper endornavirus strain IS RNA-dependent RNA polymerase (RdRp) gene, complete cds
TRINITY_DN1036_c1_g2_i1	AB597230.1	98.737	475	6	0	2	476	11359	10885	0	830	AB597230.1	920	469	469	0	98.74	1	-1	GGCTTTTTGGTGCTAGCAACAATCTGGTTCTGCCAGGAGTTACAACTTCCATTGGGGGTCCCCAATCAGTTACTGGATTGAGTTCAAACATATTCAATAATAACATCGAGTTGCTGGTCAGCTCATTTGTTGCATCTACTGAAAATTGGATTTCTGGTGGACCCACCGTCTCTGGCATTGGCACATCTTCCACAACTTGTGTTGGCTCAGGTGGTGGTTGTTCAACACTAAAGCCCTCGGCATAATCTATTTCATCAGGTTCTGGTGGCTGCAAATCCATTTCAACATTATCATCATCCTTAGAAGAATTTGAATCGTCGTTGTTGTCGGTAGTTTGTGACGAGCTGTCTATTAGTTCAATTGGTACCTCTTCTGTTGTGGCCGCTACATCACTGAGCA…	GGCTTTTTGGTGCTAGCAACAATCTGGTTCTGCCAGGAGTTACAACTTCCATTGGGGGTCCCCAATCAGTTACTGGATTGAGTTCAAACATATTCAATAATAACATCGAGTTGCTGGTCAGCTCATTTGTTGCATCTACTGAGAATTGAATTTCTGGTGGACCCACCGTCTCTGGCATTGGCACATCTTCCACAACTTGTGTTGGCTCAGGTGGTGGTTGTTCAACACTAAAGCCCTCGGCATAATCTATTTCATCAGGTTCTGGTGGCTGCAAATCCATTTCAACATCATCATCCTCCTTAGAAGAATTTGAATCGTCGTTGTTGTCGGTGGTTTGTGACGAGCTGTCTATTAGTTCAATTGGTACCTCTTCTGTTGTGGCCGCTACATCACTGAGCA…	476	14727	AB597230.1 Bell pepper endornavirus genomic RNA, complete genome, host: Capsicum annuum cv. Kyosuzu
TRINITY_DN1036_c1_g2_i1	KT149366.1	98.737	475	6	0	2	476	11359	10885	0	830	KT149366.1	920	469	469	0	98.74	1	-1	GGCTTTTTGGTGCTAGCAACAATCTGGTTCTGCCAGGAGTTACAACTTCCATTGGGGGTCCCCAATCAGTTACTGGATTGAGTTCAAACATATTCAATAATAACATCGAGTTGCTGGTCAGCTCATTTGTTGCATCTACTGAAAATTGGATTTCTGGTGGACCCACCGTCTCTGGCATTGGCACATCTTCCACAACTTGTGTTGGCTCAGGTGGTGGTTGTTCAACACTAAAGCCCTCGGCATAATCTATTTCATCAGGTTCTGGTGGCTGCAAATCCATTTCAACATTATCATCATCCTTAGAAGAATTTGAATCGTCGTTGTTGTCGGTAGTTTGTGACGAGCTGTCTATTAGTTCAATTGGTACCTCTTCTGTTGTGGCCGCTACATCACTGAGCA…	GGCTTTTTGGTGCTAGCAACAATCTGGTTCTGCCAGGAATTACAACTTCCATTGGGGGTCCCCAATCAGTTACTGGATTGAGTTCAAACATATTCAATAATAACTTCGAGTTGCTGGTCAGCTCATTTGTTGCATCTACTGAAAATTGAATTTCTGGTGGACCCACCGTCTCTGGCATTGGCACATCTTCCACAACTTGTGTTGGCTCAGGTGGTGGTTGTTCAACACTAAAGCCCTCGGCATAATCTATTTCATCAGGTTCTGGTGGCTGCAAATCCATTTCAACATTATCATCCTCCTTAGAAGAATTTGAATCGTCGTTGTTGTCGGTGGTTTGTGACGAGCTGTCTATTAGTTCAATTGGTACCTCTTCTGTTGTGGCCGCTACATCACTGAGCA…	476	14726	KT149366.1 Bell pepper endornavirus, complete genome
TRINITY_DN1036_c1_g2_i1	NC_015781.2	73.069	479	121	4	2	476	11360	10886	5.09e-72	271	NC_015781.2	300	350	350	8	73.07	1	-1	GGCTTTTTGGTGCTAGCAACAATCTGGTTCTGCCAGGAGTTACAACTTCCATTGGGGGTCCCCAATCAGTTACTGGATTGAGTTCAAACATATTCAATAATAACATCGAGTTGCTGGTCAGCTCATTTGTTGCATCTACTGAAAATTGGATTTCTGGTGGACCCACCGTCTCTGGCATTGGCACATCTTCCACAACTTGTGTTGGCTCAGGTGGTGGTTGTT---CAACACTAAAGCCCTCGGCATAATCTATTTCATCAGGTTCTGGTGGCTGCAAATCCATTTCAACATTATCATCATCCTTAGAAGAATTTGAATCGTCGTTGTTGTCGGTAGTTTGTGACGAGCTGTCTATTAGTTCAATTGGTACCTCTTCTGTTGTGGCCGCTACATCACTGA…	GGCTTTTTGGCGCTAGCAACAGTCTAGTTCTGCCGGGAGTCACCACCTCCATTGGTGGTCCCCAGTCAGTTATTGGGTTGAGTTCAAACATGTTTAACATTAACATGGGGTTGCTGGTCATTTCATTTGTTTCGTCTATCGAAAATGGAATTTCTGGCAGACTTGTTGTCTCTGGCATTGGTACCTCTTTCTCAACTTGTATTATTTCAAGTGGGTCTTGATTAGCAGCGCTA---CTCCCTGCTTGCTCTGCATCGTCAAGTTCTTGAGTTTGGACATCTGTCACGACATCATTGTTTGCTGCAGAAACATTCGAGTCCTCTTTATTTTCGGAGAGTTCCGAAGAGTTGTCTGTTAAATCAATCGGAGCTTCTTCTGTCGTTGTTGCTACGTCACTAA…	476	14728	NC_015781.2 Bell pepper endornavirus, complete genome
TRINITY_DN1061_c1_g1_i1	KY883335.1	75	108	27	0	307	414	1938	2045	4.48e-12	73.4	KY883335.1	80	81	81	0	75	1	1	CTCGCAGGCTCATTCTTCAAAAGGCACGCTGTCACCCCACAAGGAGGCTCCAACGGTTTGTAGGCACATGGTTTCAGGTACTATTTCACTCCCCTCCCGGGGTACTTT	CTCGCCGGCTCATTCTTCAACAGGCACGCGGTCAGAGCCCAGGGCTCCTCCCACTGCTTGGGAGCTTACGGTTTCATGTTCTATTTCACTCCCCGATGGGGGTTCTTT	790	2045	KY883335.1 Prunus necrotic ringspot virus isolate Q15R3N segment RNA3, complete sequence
TRINITY_DN1061_c1_g1_i1	JX997952.1	85.714	42	6	0	748	789	77	36	5.11e-05	50	JX997952.1	54	36	36	0	85.71	1	-1	TTGATGTCTTTTCCTCCAGCTACTGAGATGTTTCAGTTCGCC	TTGGTTTGTTTTCCTCTGGCTACTAAGATGTTTCAGTTCGCC	790	8677	JX997952.1 Garlic virus A isolate WA7, complete genome
TRINITY_DN1154_c0_g1_i1	KC422244.1	80.952	504	94	2	2	504	1069	567	1.04e-131	470	KC422244.1	520	408	408	2	80.95	1	-1	GTGTTAATGAAATACCACACCATAGCATCCCAAACGTTTCGCCATTTCTGGGCATCTTCTTTACCTACTGGTTTTCCCTCGAAGGTAGAAAAGTTGACATTCTGCTTCACAATGTCAAAAGCCACACGAATCAGCCACGCTGGTACTTTTGTGTCAAAAGACGAAAAGTCGATGCCATATAGTGTCTCCCCTTCCCTTAGTTTGCAACACCATTCGGTGTAAAGGCGTTGCGCACTTTTTCCATTTAGCATCGGTGAGTTGGGATCGTTCATAAAGTCACGATACATCAAAGGAGCGTAGAATCCTTCGACAACTAGCATCTCTGCTGGATATACCCAAACCAGGCGCGTTTTTGGCTCATCAATCTCTGACATGCCACCACGCTGTCCTGCAAGACAC…	GTATTTATAAAATACCACACCATGGCATCCCAAACGTTTCGCCACTTCTGAGCATCTCGCTTCTCGACTGGTTTTCCACCGAACGTCTCGAAGTTGACATTCTGTCGCAGAATATCAAATGCTACACGAATCAACCACGCTGGGACTTTTGTGTCAAAGGCACTAAAGTCAATACCATATAGTGTTTCCCCATCCCTTAGCTTGCAGCACCATTCGGTGTACAAACGCTGCGCGCTCTTCCCGTTCAACATCGGTGAATTTGGATCGCTCATAAAGTCACGATACATTAAAGGGGCGTAGAACCCTTCAACTACCAACATCTCTGCGGGGTAAATCCAAACCAGGCGCGTTTTGGGGTCGTCAATCTCCGACATACCCCCACGCTGGCCTGCCAAACAA…	506	1768	KC422244.1 Verticillium dahliae partitivirus 1 strain Vd08284 RNA-dependent RNA polymerase gene, complete cds
TRINITY_DN1154_c0_g1_i1	NC_027822.1	79.555	494	101	0	2	495	1069	576	2.16e-121	435	NC_027822.1	482	393	393	0	79.55	1	-1	GTGTTAATGAAATACCACACCATAGCATCCCAAACGTTTCGCCATTTCTGGGCATCTTCTTTACCTACTGGTTTTCCCTCGAAGGTAGAAAAGTTGACATTCTGCTTCACAATGTCAAAAGCCACACGAATCAGCCACGCTGGTACTTTTGTGTCAAAAGACGAAAAGTCGATGCCATATAGTGTCTCCCCTTCCCTTAGTTTGCAACACCATTCGGTGTAAAGGCGTTGCGCACTTTTTCCATTTAGCATCGGTGAGTTGGGATCGTTCATAAAGTCACGATACATCAAAGGAGCGTAGAATCCTTCGACAACTAGCATCTCTGCTGGATATACCCAAACCAGGCGCGTTTTTGGCTCATCAATCTCTGACATGCCACCACGCTGTCCTGCAAGACAC…	GTATTTATAAAATACCACACCATGGCATCCCAAACGTTCCGCCACTTCTGTGCATCCTGCTTGTCGACTGGTTTGCCACCGAACGTCTCAAAGTTTATATTCTGCCGCAGAATATCGAATGCTACACGAATTAGCCACGCAGGGACCTTCGTGTCAAAGGAACTGAAGTCAATGCCATATAGTGTTTCCCCATCCCTTAGCTTGCAGCACCATTCGGTGTACAAACGCTGCGCGCTCTTCCCGTTCAACATTGGTGAATTTGGATCGCTCATAAAGTCACGGTACATTAAAGGAGCGTAGAATCCTTCAACTACCAACATCTCAGCAGGGTAAATCCAAACCAGGCGCGTTTTGGGGTCGTCAATCTCCGACATACCCCCACGCTGGCCTGCCAAACAA…	506	1767	NC_027822.1 Verticillium dahliae partitivirus 1 isolate Vd-253 segment RNA1, complete sequence
TRINITY_DN1154_c0_g1_i1	NC_010349.1	78.024	496	109	0	1	496	1072	577	1.27e-111	403	NC_010349.1	446	387	387	0	78.02	1	-1	AGTGTTAATGAAATACCACACCATAGCATCCCAAACGTTTCGCCATTTCTGGGCATCTTCTTTACCTACTGGTTTTCCCTCGAAGGTAGAAAAGTTGACATTCTGCTTCACAATGTCAAAAGCCACACGAATCAGCCACGCTGGTACTTTTGTGTCAAAAGACGAAAAGTCGATGCCATATAGTGTCTCCCCTTCCCTTAGTTTGCAACACCATTCGGTGTAAAGGCGTTGCGCACTTTTTCCATTTAGCATCGGTGAGTTGGGATCGTTCATAAAGTCACGATACATCAAAGGAGCGTAGAATCCTTCGACAACTAGCATCTCTGCTGGATATACCCAAACCAGGCGCGTTTTTGGCTCATCAATCTCTGACATGCCACCACGCTGTCCTGCAAGACA…	AGTGTTGATAAAGTACCACACCATTCCGTCCCAAACGTTCCTCCACTTTTGCGCGTCTTTCTTAGAAACTGGTTTTCCTTGAAAGGTCGAAAATTCGATATTCTGGCGAAGAATATCGAACGCAATGCGGATTAACCACGCTGGTACTTTGGTGTCGAAACTCGAAAAATCGATTCCGTACAATGTCTCTCCTTCCCTCAGTTTGCAACACCATTCGGTGTACAAGCGTTGGGCACTCTTCCCGTTCAACATTGGCGAATTGGGATCGTTCATAAAGTCACGATACATTAGGGGGGCGTAGAAACCCTCCACTGTCAACATCTCTGCGGGGTAGATCCACACAAGCCGCGTTTTCGGATCGTCACGTTCTGACATTCCGCCACGCTGACCTGCCAAGCA…	506	1793	NC_010349.1 Botryotinia fuckeliana partitivirus 1, complete segment 1, genomic RNA
TRINITY_DN1154_c0_g1_i1	NC_002797.1	77.165	508	112	4	1	506	1072	567	1.45e-104	379	NC_002797.1	420	392	392	4	77.17	1	-1	AGTGTTAATGAAATACCACACCATAGCATCCCAAACGTTTCGCCATTTCTGGGCATCTTCTTTACCTACTGGTTTTCCCTCGAAGGTAGAAAAGTTGACATTCTGCTTCACAATGTCAAAAGCCACACGAATCAGCCACGCTGGTACTTTTGTGTCAAAAGACGAAAAGTCGATGCCATATAGTGTCTCCCCTTCCCTTAGTTTGCAACACCATTCGGTGTAAAGGCGTTGCGCACTTTTTCCATTTAGCATCGGTGAGTTGGGATCGTTCATAAAGTCACGATACATCAAAGGAGCGTAGAATCCTTCGACAACTAGCATCTCTGCTGGATATACCCAAACCAGGCGCGTTTTTGGCTCATCAATCTCTGACATGCCACCACGCTGTCCTGCAAGACA…	AGTATTGATAAAATACCAAACCATTGCTTCCCAAACGTTAGACCATTTTTGCGCATCATGCTTATCCACAGGCTTACCTTCGAAGGTCTCGAAGTTAATATTCTGTTTTACGATATCAAACGCAACACGGATCAACCACGCTGGTACTTTTGAGTCAAAAGCTGAAAAATCAATTCCATACAATGTCTCTCCGTCCCTCAGTCCGCAACACCACTCGGTGTACAACCGTTGCGCACTCTTCCCGTTCAACATTGGTGACTTTGGATCATTCATATAGTCATGATACATCAAAGGGGCGTAGAACCCTTCGACTACCAACATTTCTGCGGGGTAAATCCACACGAGCCGCGTTTTTGGATCAGTCCTGTCAGACATACCACCACGCTGACCCGCCAAGCA…	506	1787	NC_002797.1 Discula destructiva virus 1 segment 1, complete genome
TRINITY_DN1154_c0_g1_i1	NC_003710.1	76.518	494	116	0	2	495	1068	575	2.63e-101	369	NC_003710.1	408	378	378	0	76.52	1	-1	GTGTTAATGAAATACCACACCATAGCATCCCAAACGTTTCGCCATTTCTGGGCATCTTCTTTACCTACTGGTTTTCCCTCGAAGGTAGAAAAGTTGACATTCTGCTTCACAATGTCAAAAGCCACACGAATCAGCCACGCTGGTACTTTTGTGTCAAAAGACGAAAAGTCGATGCCATATAGTGTCTCCCCTTCCCTTAGTTTGCAACACCATTCGGTGTAAAGGCGTTGCGCACTTTTTCCATTTAGCATCGGTGAGTTGGGATCGTTCATAAAGTCACGATACATCAAAGGAGCGTAGAATCCTTCGACAACTAGCATCTCTGCTGGATATACCCAAACCAGGCGCGTTTTTGGCTCATCAATCTCTGACATGCCACCACGCTGTCCTGCAAGACAC…	GTATTTATAAAATACCACACCATGGCATCCCAGACGTTCTTCCATTTTTGCGCGTCAACCTTATTCACTGGCTTTCCTTCGAATGTTTCAAAGTTTATGTTTTGTTTCACAATATCAAAAGCCGTTCTGATCAACCACGCTGGAACCTTTGAATCAAAGGCGCTGAAATCGATTCCATATAGTGTTTCGCCTTCCCTCAAGTTACAGCACCATTCGGTGTACAAGCGCTGAGAACTCTTCCCGTTCAACATTGGTGAGTTTGGATCGCTCATATAGTCACGATACATCAAAGGAGCGTAAAAACCTTCGACACACAACATCTCTGCAGGGTAAATCCATATCAGGCGCGTTTTCGGGTCATCCCTGTCGGACATGCCCCCACGCTGACCTGCCAAGCAA…	506	1781	NC_003710.1 Discula destructiva virus 2 segment 1, complete genome
TRINITY_DN1154_c0_g1_i1	NC_028499.1	76.087	506	119	2	2	506	1059	555	1.36e-98	360	NC_028499.1	398	385	385	2	76.09	1	-1	GTGTTAATGAAATACCACACCATAGCATCCCAAACGTTTCGCCATTTCTGGGCATCTTCTTTACCTACTGGTTTTCCCTCGAAGGTAGAAAAGTTGACATTCTGCTTCACAATGTCAAAAGCCACACGAATCAGCCACGCTGGTACTTTTGTGTCAAAAGACGAAAAGTCGATGCCATATAGTGTCTCCCCTTCCCTTAGTTTGCAACACCATTCGGTGTAAAGGCGTTGCGCACTTTTTCCATTTAGCATCGGTGAGTTGGGATCGTTCATAAAGTCACGATACATCAAAGGAGCGTAGAATCCTTCGACAACTAGCATCTCTGCTGGATATACCCAAACCAGGCGCGTTTTTGGCTCATCAATCTCTGACATGCCACCACGCTGTCCTGCAAGACAC…	GTGTTCACAAAGTACCAGACCATTCCATCCCAAACGTTTCGCCACTTTTGGGCATCCTGTTTACTCACAGGTTTGCCTTGAAAAGTAGACCACTCAATATTCTGCCTCAATATGTCGAAAGCAGTATAGATGAGCCACGTCGGCACCTTCGTATCGAAGGCAGAAAAGTCGAGACCGTACAAAGTTTCACCTTCCCTTAAACCGCAGCACCACTCAGCGTACAAGCGAGGGGCACTCTTCCCGTTCAACATCGGCGAATTTGGATCGTTCATAAAGTCCCGATACATTAAAGGAGCGTAGAATCCTTCTATCACCAACATCTCCGCAGGGTAGATCCACACAAGCCGCGTTTTCGGATCATCTCTTTCAGACATTCCGCCACGCTGGCCTGCCAAGCAC…	506	1762	NC_028499.1 Penicillium aurantiogriseum partitivirus 1 RNA 1, complete sequence
TRINITY_DN1154_c0_g1_i1	KY207543.1	73.939	495	127	2	2	495	1072	579	9.18e-82	304	KY207543.1	336	366	366	2	73.94	1	-1	GTGTTAATGAAATACCACACCATAGCATCCCAAACGTTTCGCCATTTCTGGGCATCTTCTTTACCTACTGGTTTTCCCTCGAAGGTAGAAAAGTTGACATTCTGCTTCACAATGTCAAAAGCCACACGAATCAGCCACGCTGGTACTTTTGTGTCAAAAGACGAAAAGTCGATGCCATATAGTGTCTCCCCTTCCCTTAGTTTGCAACACCATTCGGTGTAAAGGCGTTGCGCACTTTTTCCATTTAGCATCGGTGAGTTGGGATCGTTCATAAAGTCACGATACATCAAAGGAGCGTAGAATCCTTCGACAACTAGCATCTCTGCTGGATATACCCAAACCAGGCGCGTTTTTGGCTCATCAATCTCTGACATGCCACCACGCTGTCCTGCAAGACAC…	GTGTTTATAAAGTAATAGACCATAGCATCCCAAACGTTACGCCACTTCTGGGCCTCACGCTTGGACACTTTCTCTCCACGGAACGTTGACCACTCAATATTCTGACGAAGAATATCAAATGCCACACGAATTAACCAAGAAGGTACTTTTGAATCAAAGCTTGAAAAGTCTAAACCATATAGTTTTTCGCCTTCCCTTAGTCCAACACACCATTCAGTGTATAGGCGTTGAGAACTCTTCCCGTTCAACATTGGTGTATGACGATCGTTCATGAAATCACGATACATCTGAGGAGCGTAAAACCCCTCCACACACAACATCTCTGCGGGGTAAACCCAAACGAGCCGGGTCTTTGGTGTATCACGTTCTGACATGTGACCACGTTGACCAGCTAGACAA…	506	1761	KY207543.1 Pseudogymnoascus destructans partitivirus-pa isolate LB-01 segment RNA1, complete sequence
TRINITY_DN1154_c0_g1_i1	NC_030480.1	73.939	495	127	2	2	495	1015	522	9.18e-82	304	NC_030480.1	336	366	366	2	73.94	1	-1	GTGTTAATGAAATACCACACCATAGCATCCCAAACGTTTCGCCATTTCTGGGCATCTTCTTTACCTACTGGTTTTCCCTCGAAGGTAGAAAAGTTGACATTCTGCTTCACAATGTCAAAAGCCACACGAATCAGCCACGCTGGTACTTTTGTGTCAAAAGACGAAAAGTCGATGCCATATAGTGTCTCCCCTTCCCTTAGTTTGCAACACCATTCGGTGTAAAGGCGTTGCGCACTTTTTCCATTTAGCATCGGTGAGTTGGGATCGTTCATAAAGTCACGATACATCAAAGGAGCGTAGAATCCTTCGACAACTAGCATCTCTGCTGGATATACCCAAACCAGGCGCGTTTTTGGCTCATCAATCTCTGACATGCCACCACGCTGTCCTGCAAGACAC…	GTGTTTATAAAGTAATAGACCATAGCATCCCAAACGTTACGCCACTTCTGGGCCTCACGCTTGGACACTTTCTCTCCACGGAACGTTGACCACTCAATATTCTGACGAAGAATATCAAATGCCACACGAATTAACCAAGAAGGTACTTTTGAATCAAAGCTTGAAAAGTCTAAACCATATAGTTTTTCGCCTTCCCTTAGTCCAACACACCATTCAGTGTATAGGCGTTGAGAACTCTTCCCGTTCAACATTGGTGTATGACGATCGTTCATGAAATCACGATACATCTGAGGAGCGTAAAACCCCTCCACACACAACATCTCTGCGGGGTAAACCCAAACGAGCCGGGTCTTTGGTGTATCACGTTCTGACATGTGACCACGTTGACCAGCTAGACAA…	506	1682	NC_030480.1 Pseudogymnoascus destructans virus isolate PdV80251 RNA-dependent RNA polymerase gene, complete cds
TRINITY_DN1154_c0_g1_i1	AY615211.1	70.624	497	140	3	2	495	1072	579	1.66e-59	230	AY615211.1	254	351	351	6	70.62	1	-1	GTGTTAATGAAATACCACACCATAGCATCCCAAACGTTTCGCCATTTCTGGGCATCTTCTTTACCTACTGGTTTTCCCTCGAAGGTAGAAAAGTTGACATTCTGCTTCACAATGTCAAAAGCCACACGAATCAGCCACGCTGGTACTTTTGTGTCAAAAGACGAAAAGTCGATGCCATATAGTGTCTCCCCTTCCCTTAGTTTGCAA--CA-CCATTCGGTGTAAAGGCGTTGCGCACTTTTTCCATTTAGCATCGGTGAGTTGGGATCGTTCATAAAGTCACGATACATCAAAGGAGCGTAGAATCCTTCGACAACTAGCATCTCTGCTGGATATACCCAAACCAGGCGCGTTTTTGGCTCATCAATCTCTGACATGCCACCACGCTGTCCTGCAAGA…	GTGTTGATGAAGTACCAAACCATACCATCCCAAACGTTACGCCACTTTTGGCGATCACGTTTAGACACCTTCTCTCCTTGCCACGTTTCCCACTCAATATTCTGACGAAGAATATCAAATGCCACGCGGATTAACCAAGAAGGTACCTTGGTGTCGAAGCTCGAAAAGTCGAGACCATAGAGAGTCTCGCCTTCGC---GTCTGCCAACCAGCCACTCGGTATACAAGCGCTGTGAGCTGGCTCCGTTGAGCATCGGAGTATCTGGTTGGTCCATGAACGCCCTGTACATCACAGGAGCGTACTGACCTTCAACTACCAGCATCTCTGCCGGATAAACCCACACCAAACGTGTCTTCGGCGCGTCCCTTTCGGACATGCCGCCACGTTGGCCGGCCAAA…	506	1781	AY615211.1 Gremmeniella abietina RNA virus MS2 unnamed segment, complete sequence
TRINITY_DN1154_c0_g1_i1	KJ786413.1	70.276	508	145	3	2	506	1072	568	5.8e-59	228	KJ786413.1	252	357	357	6	70.28	1	-1	GTGTTAATGAAATACCACACCATAGCATCCCAAACGTTTCGCCATTTCTGGGCATCTTCTTTACCTACTGGTTTTCCCTCGAAGGTAGAAAAGTTGACATTCTGCTTCACAATGTCAAAAGCCACACGAATCAGCCACGCTGGTACTTTTGTGTCAAAAGACGAAAAGTCGATGCCATATAGTGTCTCCCCTTCCCTTAGTTTGC-AACA--CCATTCGGTGTAAAGGCGTTGCGCACTTTTTCCATTTAGCATCGGTGAGTTGGGATCGTTCATAAAGTCACGATACATCAAAGGAGCGTAGAATCCTTCGACAACTAGCATCTCTGCTGGATATACCCAAACCAGGCGCGTTTTTGGCTCATCAATCTCTGACATGCCACCACGCTGTCCTGCAAGA…	GTGTTGATAAAGTACCAAACCATACCATCCCAAACGTTACGCCACTTTTGGCGATCACGTTTAGACACCTTCTCTCCTTGCCACGTTTCCCACTCAATATTCTGGCGAAGAATATCGAATGCCACGCGGATTAACCAAGAAGGTACTTTGGTGTCGAAGCTCGAAAAGTCAAGACCATGGAGAGTCTCACCTTCCC---GTCTGCCAACAAGCCACTCGGTATACAAGCGCTGTGAGCTGGCTCCGTTGAGCATCGGAGTATCTGGTTGGTCCATGAACGCCCTGTACATCACAGGAGCGTACTGACCTTCAACTACCAGCATCTCTGCCGGATAAACCCACACCAAACGTGTCTTCGGCGTATCCCTTTCGGACATGCCGCCACGTTGGCCGGCCAAA…	506	1781	KJ786413.1 Gremmeniella abietina RNA virus MS1 RNA-dependent RNA polymerase gene, complete cds
TRINITY_DN1154_c0_g1_i1	NC_004018.1	70.06	501	136	5	2	495	1072	579	1.05e-55	217	NC_004018.1	240	351	351	14	70.06	1	-1	GTGTTAATGAAATACCACACCATAGCATCCCAAACGTTTCGCCATTTCTGGGCATCTTCTTT----ACCTACTGGTTTTCCCTCGAAGGTAGAAAAGTTGACATTCTGCTTCACAATGTCAAAAGCCACACGAATCAGCCACGCTGGTACTTTTGTGTCAAAAGACGAAAAGTCGATGCCATATAGTGTCTCCCCTTCCCTTAGTTTGC-AACA--CCATTCGGTGTAAAGGCGTTGCGCACTTTTTCCATTTAGCATCGGTGAGTTGGGATCGTTCATAAAGTCACGATACATCAAAGGAGCGTAGAATCCTTCGACAACTAGCATCTCTGCTGGATATACCCAAACCAGGCGCGTTTTTGGCTCATCAATCTCTGACATGCCACCACGCTGTCCTGC…	GTGTTGATGAAGTACCAAACCATACCATCCCAAACGTTACGCCACTTTTGGCGATCACGTTTTGACACCTTCTCTCCTTGCCACG----TTTCCCACTCAATATTCTGGCGAAGAATATCGAATGCCACGCGGATTAACCAAGAAGGTACTTTGGTGTCGAAGCTCGAAAAGTCGAGACCATGGAGAGTCTCGCCTTCGC---GTCTGCCAACTAGCCACTCGGTATACAAGCGCTGTGAGCTGGCTCCGGTGAGCATCGGAGTATCTGGTTGGTCCATGAACGCCCTGTACATCACAGGAGCGTACTGACCTTCAACTACCAGCATCTCTGCCGGATAAACCCACACCAAACGTGTCTTCGGCGCATCCCTTTTGGACATGCCGCCACGTTGGCCGGC…	506	1782	NC_004018.1 Gremmeniella abietina RNA virus MS1 RNA 1, complete genome
TRINITY_DN1154_c0_g1_i1	NC_005976.2	69.08	511	148	6	1	506	1073	568	4.17e-48	192	NC_005976.2	212	353	353	10	69.08	1	-1	AGTGTTAATGAAATACCACACCATAGCATCCCAAACGTTTCGCCATTTCTGGGCATCTTCTTTACCTACTGGTTTTC-CCTCG-AAGGTAGAAAAGTTGACATTCTGCTTCACAATGTCAAAAGCCACACGAATCAGCCACGCTGGTACTTTTGTGTCAAAAGACGAAAAGTCGATGCCATATAGTGTCTCCCCTTCCCTTAGTTTGCAACACCATTCGGTGTAAAGGCGTTGCGCACTTTTTCCATTTAGCATCGGTGAGTTGGGATCGTTCATAAAGTCACGATACATCAAAGGAGCGTAGAATCCTTCGACAACTAGCATCTCTGCTGGATATACCCAAACCAGGCGCGTTTTTGGCTCATCAATCTCTGACATGCCACCACGCTGTCCTGCAAGA…	AGTATTAATGAAGTACCACACCATGCCGTCCCACACGTTTCGCCACTTTTGAGCGTCACGTTTTGAGACT--TTCTCACCTCGGAACGAATCCCAACGAATATTCTGTCGCAGAATATCGAACGCGACTCGAATTAACCAAGCTGGTACTTTGGTGTCAAATCCTGAAAAATCAAGACCGTACAACATTTCACCGTCCCTCAGTCCACAGGTCCACTCGGTATACAAGCGCTGCGAACTCTTCCCGTTCAACATCGGCGATAGGGGATCATCCATGTAAGCATGGTACATCTCAGGTGCGTAAAAACCTTCAATCGCCAACATCTCAGCGGGGTAGATCCAAACTAAACGGGTCTTAGGGTCGGAGGCTTCTGACATGCCTCCTCTCTGCCCGGCAAGA…	506	1754	NC_005976.2 Penicillium stoloniferum virus S segment 1, complete genome
TRINITY_DN1154_c0_g1_i1	AM040148.1	68.701	508	155	3	1	506	1072	567	1.46e-47	190	AM040148.1	210	349	349	4	68.7	1	-1	AGTGTTAATGAAATACCACACCATAGCATCCCAAACGTTTCGCCATTTCTGGGCATCTTCTTTACCTACTGGTTTTC-CCTCG-AAGGTAGAAAAGTTGACATTCTGCTTCACAATGTCAAAAGCCACACGAATCAGCCACGCTGGTACTTTTGTGTCAAAAGACGAAAAGTCGATGCCATATAGTGTCTCCCCTTCCCTTAGTTTGCAACACCATTCGGTGTAAAGGCGTTGCGCACTTTTTCCATTTAGCATCGGTGAGTTGGGATCGTTCATAAAGTCACGATACATCAAAGGAGCGTAGAATCCTTCGACAACTAGCATCTCTGCTGGATATACCCAAACCAGGCGCGTTTTTGGCTCATCAATCTCTGACATGCCACCACGCTGTCCTGCAAGA…	AGTATTAATGAAGTACCACACCATGCCGTCCCACACGTTTCGCCACTTTTGAGCGTCACGTTTTGAGACT--TTCTCACCTCGGAACGAATCCCAACGAATATTCTGTCGCAGAATATCGAACGCGACTCGAATTAACCAAGCTGGTACTTTGGTGTCAAATCCTGAAAAATCAAGACCGTACAACATTTCACCGTCCCTCAGTCCACAGGTCCACTCGGTATACAAGCGCTGCGAACTCTTCCCGTTCAACATCGGCGATAGGGGATCATCCATGTAAGCATGGTACATCTCAGGTGCGTAAAAACCTTCAATCGCCAACATCTCAGCGGGGTAGATCCAAACTAAACGGGTCTTAGGGTCGGAGGCTTCTGACATGCCTCCTCTCTGCCCGGCAAGA…	506	1753	AM040148.1 Penicillium stoloniferum virus S mRNA for RNA-dependent RNA polymerase (rdRp gene)
TRINITY_DN1154_c0_g2_i1	KC422244.1	80.952	504	94	2	2	504	1069	567	1.04e-131	470	KC422244.1	520	408	408	2	80.95	1	-1	GTGTTAATGAAATACCACACCATAGCATCCCAAACGTTTCGCCATTTCTGGGCATCTTCTTTACCTACTGGTTTTCCCTCGAAGGTAGAAAAGTTGACATTCTGCTTCACAATGTCAAAAGCCACACGAATCAGCCACGCTGGTACTTTTGTGTCAAAAGACGAAAAGTCGATACCATACAGTGTCTCCCCTTCCCTTAGTTTGCAACACCATTCGGTGTAAAGGCGTTGCGCACTTTTTCCATTTAGCATCGGTGAGTTGGGATCGTTCATAAAGTCACGATACATCAAAGGAGCGTAGAATCCTTCGACAACTAGCATCTCTGCTGGATATACCCAAACCAGGCGCGTTTTTGGCTCATCAATCTCTGACATGCCACCACGCTGTCCTGCAAGACAC…	GTATTTATAAAATACCACACCATGGCATCCCAAACGTTTCGCCACTTCTGAGCATCTCGCTTCTCGACTGGTTTTCCACCGAACGTCTCGAAGTTGACATTCTGTCGCAGAATATCAAATGCTACACGAATCAACCACGCTGGGACTTTTGTGTCAAAGGCACTAAAGTCAATACCATATAGTGTTTCCCCATCCCTTAGCTTGCAGCACCATTCGGTGTACAAACGCTGCGCGCTCTTCCCGTTCAACATCGGTGAATTTGGATCGCTCATAAAGTCACGATACATTAAAGGGGCGTAGAACCCTTCAACTACCAACATCTCTGCGGGGTAAATCCAAACCAGGCGCGTTTTGGGGTCGTCAATCTCCGACATACCCCCACGCTGGCCTGCCAAACAA…	506	1768	KC422244.1 Verticillium dahliae partitivirus 1 strain Vd08284 RNA-dependent RNA polymerase gene, complete cds
TRINITY_DN1154_c0_g2_i1	NC_027822.1	79.15	494	103	0	2	495	1069	576	1.12e-118	426	NC_027822.1	472	391	391	0	79.15	1	-1	GTGTTAATGAAATACCACACCATAGCATCCCAAACGTTTCGCCATTTCTGGGCATCTTCTTTACCTACTGGTTTTCCCTCGAAGGTAGAAAAGTTGACATTCTGCTTCACAATGTCAAAAGCCACACGAATCAGCCACGCTGGTACTTTTGTGTCAAAAGACGAAAAGTCGATACCATACAGTGTCTCCCCTTCCCTTAGTTTGCAACACCATTCGGTGTAAAGGCGTTGCGCACTTTTTCCATTTAGCATCGGTGAGTTGGGATCGTTCATAAAGTCACGATACATCAAAGGAGCGTAGAATCCTTCGACAACTAGCATCTCTGCTGGATATACCCAAACCAGGCGCGTTTTTGGCTCATCAATCTCTGACATGCCACCACGCTGTCCTGCAAGACAC…	GTATTTATAAAATACCACACCATGGCATCCCAAACGTTCCGCCACTTCTGTGCATCCTGCTTGTCGACTGGTTTGCCACCGAACGTCTCAAAGTTTATATTCTGCCGCAGAATATCGAATGCTACACGAATTAGCCACGCAGGGACCTTCGTGTCAAAGGAACTGAAGTCAATGCCATATAGTGTTTCCCCATCCCTTAGCTTGCAGCACCATTCGGTGTACAAACGCTGCGCGCTCTTCCCGTTCAACATTGGTGAATTTGGATCGCTCATAAAGTCACGGTACATTAAAGGAGCGTAGAATCCTTCAACTACCAACATCTCAGCAGGGTAAATCCAAACCAGGCGCGTTTTGGGGTCGTCAATCTCCGACATACCCCCACGCTGGCCTGCCAAACAA…	506	1767	NC_027822.1 Verticillium dahliae partitivirus 1 isolate Vd-253 segment RNA1, complete sequence
TRINITY_DN1154_c0_g2_i1	NC_010349.1	78.226	496	108	0	1	496	1072	577	3e-113	408	NC_010349.1	452	388	388	0	78.23	1	-1	AGTGTTAATGAAATACCACACCATAGCATCCCAAACGTTTCGCCATTTCTGGGCATCTTCTTTACCTACTGGTTTTCCCTCGAAGGTAGAAAAGTTGACATTCTGCTTCACAATGTCAAAAGCCACACGAATCAGCCACGCTGGTACTTTTGTGTCAAAAGACGAAAAGTCGATACCATACAGTGTCTCCCCTTCCCTTAGTTTGCAACACCATTCGGTGTAAAGGCGTTGCGCACTTTTTCCATTTAGCATCGGTGAGTTGGGATCGTTCATAAAGTCACGATACATCAAAGGAGCGTAGAATCCTTCGACAACTAGCATCTCTGCTGGATATACCCAAACCAGGCGCGTTTTTGGCTCATCAATCTCTGACATGCCACCACGCTGTCCTGCAAGACA…	AGTGTTGATAAAGTACCACACCATTCCGTCCCAAACGTTCCTCCACTTTTGCGCGTCTTTCTTAGAAACTGGTTTTCCTTGAAAGGTCGAAAATTCGATATTCTGGCGAAGAATATCGAACGCAATGCGGATTAACCACGCTGGTACTTTGGTGTCGAAACTCGAAAAATCGATTCCGTACAATGTCTCTCCTTCCCTCAGTTTGCAACACCATTCGGTGTACAAGCGTTGGGCACTCTTCCCGTTCAACATTGGCGAATTGGGATCGTTCATAAAGTCACGATACATTAGGGGGGCGTAGAAACCCTCCACTGTCAACATCTCTGCGGGGTAGATCCACACAAGCCGCGTTTTCGGATCGTCACGTTCTGACATTCCGCCACGCTGACCTGCCAAGCA…	506	1793	NC_010349.1 Botryotinia fuckeliana partitivirus 1, complete segment 1, genomic RNA
TRINITY_DN1154_c0_g2_i1	NC_002797.1	77.362	508	111	4	1	506	1072	567	1.19e-105	383	NC_002797.1	424	393	393	4	77.36	1	-1	AGTGTTAATGAAATACCACACCATAGCATCCCAAACGTTTCGCCATTTCTGGGCATCTTCTTTACCTACTGGTTTTCCCTCGAAGGTAGAAAAGTTGACATTCTGCTTCACAATGTCAAAAGCCACACGAATCAGCCACGCTGGTACTTTTGTGTCAAAAGACGAAAAGTCGATACCATACAGTGTCTCCCCTTCCCTTAGTTTGCAACACCATTCGGTGTAAAGGCGTTGCGCACTTTTTCCATTTAGCATCGGTGAGTTGGGATCGTTCATAAAGTCACGATACATCAAAGGAGCGTAGAATCCTTCGACAACTAGCATCTCTGCTGGATATACCCAAACCAGGCGCGTTTTTGGCTCATCAATCTCTGACATGCCACCACGCTGTCCTGCAAGACA…	AGTATTGATAAAATACCAAACCATTGCTTCCCAAACGTTAGACCATTTTTGCGCATCATGCTTATCCACAGGCTTACCTTCGAAGGTCTCGAAGTTAATATTCTGTTTTACGATATCAAACGCAACACGGATCAACCACGCTGGTACTTTTGAGTCAAAAGCTGAAAAATCAATTCCATACAATGTCTCTCCGTCCCTCAGTCCGCAACACCACTCGGTGTACAACCGTTGCGCACTCTTCCCGTTCAACATTGGTGACTTTGGATCATTCATATAGTCATGATACATCAAAGGGGCGTAGAACCCTTCGACTACCAACATTTCTGCGGGGTAAATCCACACGAGCCGCGTTTTTGGATCAGTCCTGTCAGACATACCACCACGCTGACCCGCCAAGCA…	506	1787	NC_002797.1 Discula destructiva virus 1 segment 1, complete genome
TRINITY_DN1154_c0_g2_i1	NC_028499.1	76.482	506	117	2	2	506	1059	555	2.63e-101	369	NC_028499.1	408	387	387	2	76.48	1	-1	GTGTTAATGAAATACCACACCATAGCATCCCAAACGTTTCGCCATTTCTGGGCATCTTCTTTACCTACTGGTTTTCCCTCGAAGGTAGAAAAGTTGACATTCTGCTTCACAATGTCAAAAGCCACACGAATCAGCCACGCTGGTACTTTTGTGTCAAAAGACGAAAAGTCGATACCATACAGTGTCTCCCCTTCCCTTAGTTTGCAACACCATTCGGTGTAAAGGCGTTGCGCACTTTTTCCATTTAGCATCGGTGAGTTGGGATCGTTCATAAAGTCACGATACATCAAAGGAGCGTAGAATCCTTCGACAACTAGCATCTCTGCTGGATATACCCAAACCAGGCGCGTTTTTGGCTCATCAATCTCTGACATGCCACCACGCTGTCCTGCAAGACAC…	GTGTTCACAAAGTACCAGACCATTCCATCCCAAACGTTTCGCCACTTTTGGGCATCCTGTTTACTCACAGGTTTGCCTTGAAAAGTAGACCACTCAATATTCTGCCTCAATATGTCGAAAGCAGTATAGATGAGCCACGTCGGCACCTTCGTATCGAAGGCAGAAAAGTCGAGACCGTACAAAGTTTCACCTTCCCTTAAACCGCAGCACCACTCAGCGTACAAGCGAGGGGCACTCTTCCCGTTCAACATCGGCGAATTTGGATCGTTCATAAAGTCCCGATACATTAAAGGAGCGTAGAATCCTTCTATCACCAACATCTCCGCAGGGTAGATCCACACAAGCCGCGTTTTCGGATCATCTCTTTCAGACATTCCGCCACGCTGGCCTGCCAAGCAC…	506	1762	NC_028499.1 Penicillium aurantiogriseum partitivirus 1 RNA 1, complete sequence
TRINITY_DN1154_c0_g2_i1	NC_003710.1	76.316	494	117	0	2	495	1068	575	1.12e-99	363	NC_003710.1	402	377	377	0	76.32	1	-1	GTGTTAATGAAATACCACACCATAGCATCCCAAACGTTTCGCCATTTCTGGGCATCTTCTTTACCTACTGGTTTTCCCTCGAAGGTAGAAAAGTTGACATTCTGCTTCACAATGTCAAAAGCCACACGAATCAGCCACGCTGGTACTTTTGTGTCAAAAGACGAAAAGTCGATACCATACAGTGTCTCCCCTTCCCTTAGTTTGCAACACCATTCGGTGTAAAGGCGTTGCGCACTTTTTCCATTTAGCATCGGTGAGTTGGGATCGTTCATAAAGTCACGATACATCAAAGGAGCGTAGAATCCTTCGACAACTAGCATCTCTGCTGGATATACCCAAACCAGGCGCGTTTTTGGCTCATCAATCTCTGACATGCCACCACGCTGTCCTGCAAGACAC…	GTATTTATAAAATACCACACCATGGCATCCCAGACGTTCTTCCATTTTTGCGCGTCAACCTTATTCACTGGCTTTCCTTCGAATGTTTCAAAGTTTATGTTTTGTTTCACAATATCAAAAGCCGTTCTGATCAACCACGCTGGAACCTTTGAATCAAAGGCGCTGAAATCGATTCCATATAGTGTTTCGCCTTCCCTCAAGTTACAGCACCATTCGGTGTACAAGCGCTGAGAACTCTTCCCGTTCAACATTGGTGAGTTTGGATCGCTCATATAGTCACGATACATCAAAGGAGCGTAAAAACCTTCGACACACAACATCTCTGCAGGGTAAATCCATATCAGGCGCGTTTTCGGGTCATCCCTGTCGGACATGCCCCCACGCTGACCTGCCAAGCAA…	506	1781	NC_003710.1 Discula destructiva virus 2 segment 1, complete genome
TRINITY_DN1154_c0_g2_i1	KY207543.1	73.939	495	127	2	2	495	1072	579	9.18e-82	304	KY207543.1	336	366	366	2	73.94	1	-1	GTGTTAATGAAATACCACACCATAGCATCCCAAACGTTTCGCCATTTCTGGGCATCTTCTTTACCTACTGGTTTTCCCTCGAAGGTAGAAAAGTTGACATTCTGCTTCACAATGTCAAAAGCCACACGAATCAGCCACGCTGGTACTTTTGTGTCAAAAGACGAAAAGTCGATACCATACAGTGTCTCCCCTTCCCTTAGTTTGCAACACCATTCGGTGTAAAGGCGTTGCGCACTTTTTCCATTTAGCATCGGTGAGTTGGGATCGTTCATAAAGTCACGATACATCAAAGGAGCGTAGAATCCTTCGACAACTAGCATCTCTGCTGGATATACCCAAACCAGGCGCGTTTTTGGCTCATCAATCTCTGACATGCCACCACGCTGTCCTGCAAGACAC…	GTGTTTATAAAGTAATAGACCATAGCATCCCAAACGTTACGCCACTTCTGGGCCTCACGCTTGGACACTTTCTCTCCACGGAACGTTGACCACTCAATATTCTGACGAAGAATATCAAATGCCACACGAATTAACCAAGAAGGTACTTTTGAATCAAAGCTTGAAAAGTCTAAACCATATAGTTTTTCGCCTTCCCTTAGTCCAACACACCATTCAGTGTATAGGCGTTGAGAACTCTTCCCGTTCAACATTGGTGTATGACGATCGTTCATGAAATCACGATACATCTGAGGAGCGTAAAACCCCTCCACACACAACATCTCTGCGGGGTAAACCCAAACGAGCCGGGTCTTTGGTGTATCACGTTCTGACATGTGACCACGTTGACCAGCTAGACAA…	506	1761	KY207543.1 Pseudogymnoascus destructans partitivirus-pa isolate LB-01 segment RNA1, complete sequence
TRINITY_DN1154_c0_g2_i1	NC_030480.1	73.939	495	127	2	2	495	1015	522	9.18e-82	304	NC_030480.1	336	366	366	2	73.94	1	-1	GTGTTAATGAAATACCACACCATAGCATCCCAAACGTTTCGCCATTTCTGGGCATCTTCTTTACCTACTGGTTTTCCCTCGAAGGTAGAAAAGTTGACATTCTGCTTCACAATGTCAAAAGCCACACGAATCAGCCACGCTGGTACTTTTGTGTCAAAAGACGAAAAGTCGATACCATACAGTGTCTCCCCTTCCCTTAGTTTGCAACACCATTCGGTGTAAAGGCGTTGCGCACTTTTTCCATTTAGCATCGGTGAGTTGGGATCGTTCATAAAGTCACGATACATCAAAGGAGCGTAGAATCCTTCGACAACTAGCATCTCTGCTGGATATACCCAAACCAGGCGCGTTTTTGGCTCATCAATCTCTGACATGCCACCACGCTGTCCTGCAAGACAC…	GTGTTTATAAAGTAATAGACCATAGCATCCCAAACGTTACGCCACTTCTGGGCCTCACGCTTGGACACTTTCTCTCCACGGAACGTTGACCACTCAATATTCTGACGAAGAATATCAAATGCCACACGAATTAACCAAGAAGGTACTTTTGAATCAAAGCTTGAAAAGTCTAAACCATATAGTTTTTCGCCTTCCCTTAGTCCAACACACCATTCAGTGTATAGGCGTTGAGAACTCTTCCCGTTCAACATTGGTGTATGACGATCGTTCATGAAATCACGATACATCTGAGGAGCGTAAAACCCCTCCACACACAACATCTCTGCGGGGTAAACCCAAACGAGCCGGGTCTTTGGTGTATCACGTTCTGACATGTGACCACGTTGACCAGCTAGACAA…	506	1682	NC_030480.1 Pseudogymnoascus destructans virus isolate PdV80251 RNA-dependent RNA polymerase gene, complete cds
TRINITY_DN1154_c0_g2_i1	AY615211.1	70.825	497	139	3	2	495	1072	579	3.91e-61	235	AY615211.1	260	352	352	6	70.82	1	-1	GTGTTAATGAAATACCACACCATAGCATCCCAAACGTTTCGCCATTTCTGGGCATCTTCTTTACCTACTGGTTTTCCCTCGAAGGTAGAAAAGTTGACATTCTGCTTCACAATGTCAAAAGCCACACGAATCAGCCACGCTGGTACTTTTGTGTCAAAAGACGAAAAGTCGATACCATACAGTGTCTCCCCTTCCCTTAGTTTGCAA--CA-CCATTCGGTGTAAAGGCGTTGCGCACTTTTTCCATTTAGCATCGGTGAGTTGGGATCGTTCATAAAGTCACGATACATCAAAGGAGCGTAGAATCCTTCGACAACTAGCATCTCTGCTGGATATACCCAAACCAGGCGCGTTTTTGGCTCATCAATCTCTGACATGCCACCACGCTGTCCTGCAAGA…	GTGTTGATGAAGTACCAAACCATACCATCCCAAACGTTACGCCACTTTTGGCGATCACGTTTAGACACCTTCTCTCCTTGCCACGTTTCCCACTCAATATTCTGACGAAGAATATCAAATGCCACGCGGATTAACCAAGAAGGTACCTTGGTGTCGAAGCTCGAAAAGTCGAGACCATAGAGAGTCTCGCCTTCGC---GTCTGCCAACCAGCCACTCGGTATACAAGCGCTGTGAGCTGGCTCCGTTGAGCATCGGAGTATCTGGTTGGTCCATGAACGCCCTGTACATCACAGGAGCGTACTGACCTTCAACTACCAGCATCTCTGCCGGATAAACCCACACCAAACGTGTCTTCGGCGCGTCCCTTTCGGACATGCCGCCACGTTGGCCGGCCAAA…	506	1781	AY615211.1 Gremmeniella abietina RNA virus MS2 unnamed segment, complete sequence
TRINITY_DN1154_c0_g2_i1	KJ786413.1	70.472	508	144	3	2	506	1072	568	4.76e-60	232	KJ786413.1	256	358	358	6	70.47	1	-1	GTGTTAATGAAATACCACACCATAGCATCCCAAACGTTTCGCCATTTCTGGGCATCTTCTTTACCTACTGGTTTTCCCTCGAAGGTAGAAAAGTTGACATTCTGCTTCACAATGTCAAAAGCCACACGAATCAGCCACGCTGGTACTTTTGTGTCAAAAGACGAAAAGTCGATACCATACAGTGTCTCCCCTTCCCTTAGTTTGC-AACA--CCATTCGGTGTAAAGGCGTTGCGCACTTTTTCCATTTAGCATCGGTGAGTTGGGATCGTTCATAAAGTCACGATACATCAAAGGAGCGTAGAATCCTTCGACAACTAGCATCTCTGCTGGATATACCCAAACCAGGCGCGTTTTTGGCTCATCAATCTCTGACATGCCACCACGCTGTCCTGCAAGA…	GTGTTGATAAAGTACCAAACCATACCATCCCAAACGTTACGCCACTTTTGGCGATCACGTTTAGACACCTTCTCTCCTTGCCACGTTTCCCACTCAATATTCTGGCGAAGAATATCGAATGCCACGCGGATTAACCAAGAAGGTACTTTGGTGTCGAAGCTCGAAAAGTCAAGACCATGGAGAGTCTCACCTTCCC---GTCTGCCAACAAGCCACTCGGTATACAAGCGCTGTGAGCTGGCTCCGTTGAGCATCGGAGTATCTGGTTGGTCCATGAACGCCCTGTACATCACAGGAGCGTACTGACCTTCAACTACCAGCATCTCTGCCGGATAAACCCACACCAAACGTGTCTTCGGCGTATCCCTTTCGGACATGCCGCCACGTTGGCCGGCCAAA…	506	1781	KJ786413.1 Gremmeniella abietina RNA virus MS1 RNA-dependent RNA polymerase gene, complete cds
TRINITY_DN1154_c0_g2_i1	NC_004018.1	70.259	501	135	5	2	495	1072	579	2.47e-57	223	NC_004018.1	246	352	352	14	70.26	1	-1	GTGTTAATGAAATACCACACCATAGCATCCCAAACGTTTCGCCATTTCTGGGCATCTTCTTT----ACCTACTGGTTTTCCCTCGAAGGTAGAAAAGTTGACATTCTGCTTCACAATGTCAAAAGCCACACGAATCAGCCACGCTGGTACTTTTGTGTCAAAAGACGAAAAGTCGATACCATACAGTGTCTCCCCTTCCCTTAGTTTGC-AACA--CCATTCGGTGTAAAGGCGTTGCGCACTTTTTCCATTTAGCATCGGTGAGTTGGGATCGTTCATAAAGTCACGATACATCAAAGGAGCGTAGAATCCTTCGACAACTAGCATCTCTGCTGGATATACCCAAACCAGGCGCGTTTTTGGCTCATCAATCTCTGACATGCCACCACGCTGTCCTGC…	GTGTTGATGAAGTACCAAACCATACCATCCCAAACGTTACGCCACTTTTGGCGATCACGTTTTGACACCTTCTCTCCTTGCCACG----TTTCCCACTCAATATTCTGGCGAAGAATATCGAATGCCACGCGGATTAACCAAGAAGGTACTTTGGTGTCGAAGCTCGAAAAGTCGAGACCATGGAGAGTCTCGCCTTCGC---GTCTGCCAACTAGCCACTCGGTATACAAGCGCTGTGAGCTGGCTCCGGTGAGCATCGGAGTATCTGGTTGGTCCATGAACGCCCTGTACATCACAGGAGCGTACTGACCTTCAACTACCAGCATCTCTGCCGGATAAACCCACACCAAACGTGTCTTCGGCGCATCCCTTTTGGACATGCCGCCACGTTGGCCGGC…	506	1782	NC_004018.1 Gremmeniella abietina RNA virus MS1 RNA 1, complete genome
TRINITY_DN1154_c0_g2_i1	NC_005976.2	69.472	511	146	6	1	506	1073	568	8.06e-51	201	NC_005976.2	222	355	355	10	69.47	1	-1	AGTGTTAATGAAATACCACACCATAGCATCCCAAACGTTTCGCCATTTCTGGGCATCTTCTTTACCTACTGGTTTTC-CCTCG-AAGGTAGAAAAGTTGACATTCTGCTTCACAATGTCAAAAGCCACACGAATCAGCCACGCTGGTACTTTTGTGTCAAAAGACGAAAAGTCGATACCATACAGTGTCTCCCCTTCCCTTAGTTTGCAACACCATTCGGTGTAAAGGCGTTGCGCACTTTTTCCATTTAGCATCGGTGAGTTGGGATCGTTCATAAAGTCACGATACATCAAAGGAGCGTAGAATCCTTCGACAACTAGCATCTCTGCTGGATATACCCAAACCAGGCGCGTTTTTGGCTCATCAATCTCTGACATGCCACCACGCTGTCCTGCAAGA…	AGTATTAATGAAGTACCACACCATGCCGTCCCACACGTTTCGCCACTTTTGAGCGTCACGTTTTGAGACT--TTCTCACCTCGGAACGAATCCCAACGAATATTCTGTCGCAGAATATCGAACGCGACTCGAATTAACCAAGCTGGTACTTTGGTGTCAAATCCTGAAAAATCAAGACCGTACAACATTTCACCGTCCCTCAGTCCACAGGTCCACTCGGTATACAAGCGCTGCGAACTCTTCCCGTTCAACATCGGCGATAGGGGATCATCCATGTAAGCATGGTACATCTCAGGTGCGTAAAAACCTTCAATCGCCAACATCTCAGCGGGGTAGATCCAAACTAAACGGGTCTTAGGGTCGGAGGCTTCTGACATGCCTCCTCTCTGCCCGGCAAGA…	506	1754	NC_005976.2 Penicillium stoloniferum virus S segment 1, complete genome
TRINITY_DN1154_c0_g2_i1	AM040148.1	69.094	508	153	3	1	506	1072	567	2.81e-50	199	AM040148.1	220	351	351	4	69.09	1	-1	AGTGTTAATGAAATACCACACCATAGCATCCCAAACGTTTCGCCATTTCTGGGCATCTTCTTTACCTACTGGTTTTC-CCTCG-AAGGTAGAAAAGTTGACATTCTGCTTCACAATGTCAAAAGCCACACGAATCAGCCACGCTGGTACTTTTGTGTCAAAAGACGAAAAGTCGATACCATACAGTGTCTCCCCTTCCCTTAGTTTGCAACACCATTCGGTGTAAAGGCGTTGCGCACTTTTTCCATTTAGCATCGGTGAGTTGGGATCGTTCATAAAGTCACGATACATCAAAGGAGCGTAGAATCCTTCGACAACTAGCATCTCTGCTGGATATACCCAAACCAGGCGCGTTTTTGGCTCATCAATCTCTGACATGCCACCACGCTGTCCTGCAAGA…	AGTATTAATGAAGTACCACACCATGCCGTCCCACACGTTTCGCCACTTTTGAGCGTCACGTTTTGAGACT--TTCTCACCTCGGAACGAATCCCAACGAATATTCTGTCGCAGAATATCGAACGCGACTCGAATTAACCAAGCTGGTACTTTGGTGTCAAATCCTGAAAAATCAAGACCGTACAACATTTCACCGTCCCTCAGTCCACAGGTCCACTCGGTATACAAGCGCTGCGAACTCTTCCCGTTCAACATCGGCGATAGGGGATCATCCATGTAAGCATGGTACATCTCAGGTGCGTAAAAACCTTCAATCGCCAACATCTCAGCGGGGTAGATCCAAACTAAACGGGTCTTAGGGTCGGAGGCTTCTGACATGCCTCCTCTCTGCCCGGCAAGA…	506	1753	AM040148.1 Penicillium stoloniferum virus S mRNA for RNA-dependent RNA polymerase (rdRp gene)
TRINITY_DN1154_c1_g1_i1	NC_002797.1	77.578	669	148	2	6	673	986	1653	7.28e-148	524	NC_002797.1	580	519	519	2	77.58	1	1	ACCTTCGAGGGAAAACCTGTTGGTAAAGAAGATGCTCAGAAATGGCGCAACGTTTGGGATGCCATGGTGTGGTATTTCATTAACACTCCCATTTTGATGCCGGACGGACGTATGTTCCGTAAGTACCGGGGTGTACCTTCCGGATCTTGGTGGACGCAGATTATCGACTCAGTAGTGAACCACATACTTATCGATTATCTTGCAGACTGCCAGCAAGTAGAGATCCGAAACCTGAGGGTTCTGGGCGACGACAGTGCGTTCAGAGCAAACGACCAGTTTGATCTGGAAGTTGCAAAACTAGATTGCGTTCCAACTGGAATGATCATCAAACCTGAGAAGTGTGAGAGAACAAAGGATCCATCCGAGTTCAAACTTTTAGGTACGAAGTATCGTGACGGT…	ACCTTCGAAGGTAAGCCTGTGGATAAGCATGATGCGCAAAAATGGTCTAACGTTTGGGAAGCAATGGTTTGGTATTTTATCAATACTCCGATTTTGATGCCTGATGGAAGAATGTTCCGAAAGTATCGAGGTGTGCCTTCCGGATCCTGGTGGACGCAGATAATTGACTCAGTTGTGAATAACATCTTGATAGATTATCTTGCGGACTGCCAGCAGCTAGAGATCCGAAACCTGAAGGTGCTGGGCGACGACAGTGCGTTTCGTTCGACCGACCAGTTCGATCTGGAGGTGGCGAAGGACGATTGTGTACCTACCGGGATGGTAATAAAACCTGAGAAGTGCGAACGGACGGAAGACCCTAATGATTTCAAGTTGTTAGGGACGAAGTACCGTGACGGA…	673	1787	NC_002797.1 Discula destructiva virus 1 segment 1, complete genome
TRINITY_DN1154_c1_g1_i1	NC_028499.1	77.049	671	154	0	3	673	971	1641	1.08e-145	517	NC_028499.1	572	517	517	0	77.05	1	1	TCTACCTTCGAGGGAAAACCTGTTGGTAAAGAAGATGCTCAGAAATGGCGCAACGTTTGGGATGCCATGGTGTGGTATTTCATTAACACTCCCATTTTGATGCCGGACGGACGTATGTTCCGTAAGTACCGGGGTGTACCTTCCGGATCTTGGTGGACGCAGATTATCGACTCAGTAGTGAACCACATACTTATCGATTATCTTGCAGACTGCCAGCAAGTAGAGATCCGAAACCTGAGGGTTCTGGGCGACGACAGTGCGTTCAGAGCAAACGACCAGTTTGATCTGGAAGTTGCAAAACTAGATTGCGTTCCAACTGGAATGATCATCAAACCTGAGAAGTGTGAGAGAACAAAGGATCCATCCGAGTTCAAACTTTTAGGTACGAAGTATCGTGAC…	TCTACTTTTCAAGGCAAACCTGTGAGTAAACAGGATGCCCAAAAGTGGCGAAACGTTTGGGATGGAATGGTCTGGTACTTTGTGAACACACCAATTTTAATGCCGGACGGACGCATGTTCCGTAAATACCGGGGTGTCCCTTCGGGTTCCTGGTGGACGCAGATGATCGATTCAGTTGTGAATTACATACTGATAGATTATCTCGCTGAATGCCAGGAAGTAGAAATCCGAAACCTTAGGGTGCTGGGTGATGACAGTGCATTCCGATCAACCGACCAGTTCAGTCTGGAACAAGCCAAGGTTGATTGTGAACCAACGCATATGTTACTGAAGCCGGAAAAGTGTGAGAAAACGAAAGACCCGTGTGAGTTCAAGTTACTTGGAACGACGTATCGGGAC…	673	1762	NC_028499.1 Penicillium aurantiogriseum partitivirus 1 RNA 1, complete sequence
TRINITY_DN1154_c1_g1_i1	NC_003710.1	77.66	658	143	4	6	661	983	1638	1.6e-143	509	NC_003710.1	564	511	511	4	77.66	1	1	ACCTTCGAGGGAAAACCTGTTGGTAAAGAAGATGCTCAGAAATGGCGCAACGTTTGGGATGCCATGGTGTGGTATTTCATTAACACTCCCATTTTGATGCCGGACGGACGTATGTTCCGTAAGTACCGGGGTGTACCTTCCGGATCTTGGTGGACGCAGATTATCGACTCAGTAGTGAACCACATACTTATCGATTATCTTGCAGACTGCCAGCAAGTAGAGAT-CCGAAACCTGAGGGTTCTGGGCGACGACAGTGCGTTCAGAGCAAACGACCAGTTTGATCTGGAAGTTGCAAAACTAGATTGCGTTCCAACTGGAATGATCATCAAACCTGAGAAGTGTGAGAGAACAAAGGATCCATCCGAGTTCAAACTTTTAGGTACGAAGTATCGTGACGG…	ACATTCGAAGGAAAGCCAGTGAATAAGGTTGACGCGCAAAAATGGAAGAACGTCTGGGATGCCATGGTGTGGTATTTTATAAATACGCCTATCTTGATGCCTGATGGAAGAATGTTCCGAAAGTATCGTGGTGTACCTTCCGGATCTTGGTGGACGCAGATTATCGATTCAGTTGTGAATAACATCCTAATTGACTATCTTGCAGACTGCCAAAGTGTGAAGATCCCGAAACCTGA-GGTACTGGGCGACGACAGTGCGTTTCGTTCTAACGACCAGTTCGATCTGGAAGTGGCGAAGGACGATTGTGTACCTACTGGAATGGTGATAAGACCGGAGAAGTGCGAGAAAACTGAAGACCCAGCAGAGTTCAAGCTCCTGGGTACCAAGTATCGTAGCGG…	673	1781	NC_003710.1 Discula destructiva virus 2 segment 1, complete genome
TRINITY_DN1154_c1_g1_i1	NC_027822.1	76.497	668	157	0	6	673	984	1651	1.01e-139	497	NC_027822.1	550	511	511	0	76.5	1	1	ACCTTCGAGGGAAAACCTGTTGGTAAAGAAGATGCTCAGAAATGGCGCAACGTTTGGGATGCCATGGTGTGGTATTTCATTAACACTCCCATTTTGATGCCGGACGGACGTATGTTCCGTAAGTACCGGGGTGTACCTTCCGGATCTTGGTGGACGCAGATTATCGACTCAGTAGTGAACCACATACTTATCGATTATCTTGCAGACTGCCAGCAAGTAGAGATCCGAAACCTGAGGGTTCTGGGCGACGACAGTGCGTTCAGAGCAAACGACCAGTTTGATCTGGAAGTTGCAAAACTAGATTGCGTTCCAACTGGAATGATCATCAAACCTGAGAAGTGTGAGAGAACAAAGGATCCATCCGAGTTCAAACTTTTAGGTACGAAGTATCGTGACGGT…	ACGTTCGGTGGCAAACCAGTCGACAAGCAGGATGCACAGAAGTGGCGGAACGTTTGGGATGCCATGGTGTGGTATTTTATAAATACACCTATACTTATGCCGGACGGCCGGATGTTCCGGAAGTTCCGGGGTGTACCCTCCGGATCATGGTGGACCCAGATGATCGATTCAGTCGTAAATCATATCCTGATTGATTATCTTGCGGATTGCCAGCGTGTAGAGATCCGAAACCTGAGGGTGTTGGGAGATGATAGCGCCTTTTGCTCTGGTGACCAGTTTGATCTGGAATTAGCGAAGGGCGATTGCGAGCCTACTGGTATGGTGATAAAGCCCGAGAAGTGTGAACGAACCAAAGACCCAGGTGAGTTCAAACTGCTGGGTACGACATATCGGGGGGGC…	673	1767	NC_027822.1 Verticillium dahliae partitivirus 1 isolate Vd-253 segment RNA1, complete sequence
TRINITY_DN1154_c1_g1_i1	KC422244.1	76.048	668	160	0	6	673	984	1651	6.38e-136	484	KC422244.1	536	508	508	0	76.05	1	1	ACCTTCGAGGGAAAACCTGTTGGTAAAGAAGATGCTCAGAAATGGCGCAACGTTTGGGATGCCATGGTGTGGTATTTCATTAACACTCCCATTTTGATGCCGGACGGACGTATGTTCCGTAAGTACCGGGGTGTACCTTCCGGATCTTGGTGGACGCAGATTATCGACTCAGTAGTGAACCACATACTTATCGATTATCTTGCAGACTGCCAGCAAGTAGAGATCCGAAACCTGAGGGTTCTGGGCGACGACAGTGCGTTCAGAGCAAACGACCAGTTTGATCTGGAAGTTGCAAAACTAGATTGCGTTCCAACTGGAATGATCATCAAACCTGAGAAGTGTGAGAGAACAAAGGATCCATCCGAGTTCAAACTTTTAGGTACGAAGTATCGTGACGGT…	ACGTTCGGTGGAAAACCAGTCGAGAAGCGAGATGCTCAGAAGTGGCGAAACGTTTGGGATGCCATGGTGTGGTATTTTATAAATACACCCATACTTATGCCGGACGGCCGGATGTTCCGGAAGTTCCGGGGTGTACCCTCCGGGTCGTGGTGGACCCAGATGATCGATTCAGTCGTAAATCATATCCTGATTGATTATCTTGCGGATTGCCAGCGTGTAGAGATCCGAAACCTGAGGGTGTTGGGAGATGATAGCGCCTTTTGCTCTGGTGGCCAGTTTGATCTGGAATTGGCGAAAGGCGACTGCGAGAACACCGGTATGGTGATAAAGCCTGAGAAGTGTGAACGAACCAAAGACCCAGGTGAGTTCAAACTATTAGGTACGACGTACCGAGGGGGC…	673	1768	KC422244.1 Verticillium dahliae partitivirus 1 strain Vd08284 RNA-dependent RNA polymerase gene, complete cds
TRINITY_DN1154_c1_g1_i1	NC_010349.1	75.632	673	164	0	1	673	981	1653	3.31e-133	475	NC_010349.1	526	509	509	0	75.63	1	1	TTTCTACCTTCGAGGGAAAACCTGTTGGTAAAGAAGATGCTCAGAAATGGCGCAACGTTTGGGATGCCATGGTGTGGTATTTCATTAACACTCCCATTTTGATGCCGGACGGACGTATGTTCCGTAAGTACCGGGGTGTACCTTCCGGATCTTGGTGGACGCAGATTATCGACTCAGTAGTGAACCACATACTTATCGATTATCTTGCAGACTGCCAGCAAGTAGAGATCCGAAACCTGAGGGTTCTGGGCGACGACAGTGCGTTCAGAGCAAACGACCAGTTTGATCTGGAAGTTGCAAAACTAGATTGCGTTCCAACTGGAATGATCATCAAACCTGAGAAGTGTGAGAGAACAAAGGATCCATCCGAGTTCAAACTTTTAGGTACGAAGTATCGTG…	TTTCGACCTTTCAAGGAAAACCAGTTTCTAAGAAAGACGCGCAAAAGTGGAGGAACGTTTGGGACGGAATGGTGTGGTACTTTATCAACACTCCCATTCTCATGCCTGATGGACGAATGTTTCGTAAGTTCAGGGGTGTACCTTCCGGATCGTGGTGGACGCAGATGATTGATAGTGTGGTTAATCACATACTAATTGATTATTTGGCAGACTGCCAAGATGTAGAGATCCGAAACCTTAAGGTATTGGGTGACGACAGCGCTTTTCGTTCCAGTGACGAGTTTCAACTCGAAACGGCGAAGCTTGATTGTAAACCTACGGGTATGGTTATCAAACCCGAGAAATGTGAGAAAACAGCTGATCCAGCTGACTTCAAACTTCTTGGAACCAAATATCGTA…	673	1793	NC_010349.1 Botryotinia fuckeliana partitivirus 1, complete segment 1, genomic RNA
TRINITY_DN1154_c1_g1_i1	AM040148.1	70.533	638	178	4	36	668	1016	1648	6.4e-79	295	AM040148.1	326	450	450	10	70.53	1	1	GATGCTCAGAAATGGCGCAACGTTTGGGATGCCATGGTGTGGTATTTCATTAACACTCCCATTTTGATGCCGGACGGACGTATGTTCCGTAAGTACCGGGGTGTACCTTCCGGATCTTGGTGGACGCAGATTATCGACTCAGTAGTGAACCACATACTTATCGATTATCTTGCAGACTGCCAGCAAGTAGAGATCCGAAACCTGAGGGTTCTGGGCGACGACAGTGCGTTCAGAGCAAACGACCAGTTTGATCTGGAAGTTGCAAAACTAGATTGCGTTCCAACTGGAA---TGATCATCAAACCTGAGAAGTGTGAGAGAACAAAGGATCCATCCGAGTTCAAACTTTTAGGTACGAAGTATCGTGACGGTCGCGTTCATCGTGACACCAGTGAGTGG…	GACGCTCAAAAGTGGCGAAACGTGTGGGACGGCATGGTGTGGTACTTCATTAATACTCCCATTCTGATGCCAGATGGCCGGATGTTCCGGAAATATCGAGGTGTTCCCTCTGGCTCTTGGTTTACCCAAATGATCGACAGTGTTGTGAATTACATCCTGGTTGATTACCTCGCTGCTTGCCAGCAGTGTGAGATCCGTGCACTACGGGTCTTAGGCGACGACAGCGCTTTCCGTTCTTGCGATCCTTTCTCTTTGGACCTCGCAAGCCATGAT---GCTGAATGTGTAAACATGATCTTACACCCTGAAAAGTGTGAGAAGACTAAGGACCCAACGGCGTTCAAGCTGTTGGGTACAACTTACCGGAACGGGCGCCCTCATCGTGAAACGAATGAGTGG…	673	1753	AM040148.1 Penicillium stoloniferum virus S mRNA for RNA-dependent RNA polymerase (rdRp gene)
TRINITY_DN1154_c1_g1_i1	NC_005976.2	70.533	638	178	4	36	668	1017	1649	6.4e-79	295	NC_005976.2	326	450	450	10	70.53	1	1	GATGCTCAGAAATGGCGCAACGTTTGGGATGCCATGGTGTGGTATTTCATTAACACTCCCATTTTGATGCCGGACGGACGTATGTTCCGTAAGTACCGGGGTGTACCTTCCGGATCTTGGTGGACGCAGATTATCGACTCAGTAGTGAACCACATACTTATCGATTATCTTGCAGACTGCCAGCAAGTAGAGATCCGAAACCTGAGGGTTCTGGGCGACGACAGTGCGTTCAGAGCAAACGACCAGTTTGATCTGGAAGTTGCAAAACTAGATTGCGTTCCAACTGGAA---TGATCATCAAACCTGAGAAGTGTGAGAGAACAAAGGATCCATCCGAGTTCAAACTTTTAGGTACGAAGTATCGTGACGGTCGCGTTCATCGTGACACCAGTGAGTGG…	GACGCTCAAAAGTGGCGAAACGTGTGGGACGGCATGGTGTGGTACTTCATTAATACTCCCATTCTGATGCCAGATGGCCGGATGTTCCGGAAATATCGAGGTGTTCCCTCTGGCTCTTGGTTTACCCAAATGATCGACAGTGTTGTGAATTACATCCTGGTTGATTACCTCGCTGCTTGCCAGCAGTGTGAGATCCGTGCACTACGGGTCTTAGGCGACGACAGCGCTTTCCGTTCTTGCGATCCTTTCTCTTTGGACCTCGCAAGCCATGAT---GCTGAATGTGTAAACATGATCTTACACCCTGAAAAGTGTGAGAAGACTAAGGACCCAACGGCGTTCAAGCTGTTGGGTACAACTTACCGGAACGGGCGCCCTCATCGTGAAACGAATGAGTGG…	673	1754	NC_005976.2 Penicillium stoloniferum virus S segment 1, complete genome
TRINITY_DN1154_c1_g1_i1	KJ786413.1	70.942	616	171	6	42	653	1023	1634	1.16e-75	284	KJ786413.1	314	437	437	8	70.94	1	1	CAGAAATGGCGCAACGTTTGGGATGCCATGGTGTGGTATTTCATTAACACTCCCATTTTGATGCCGGACGGACGTATGTTCCGTAAGTACCGGGGTGTACCTTCCGGATCTTGGTGGACGCAGATTATCGACTCAGTAGTGAACCACATACTTA-TCGATTATCTTGCAGACTGCCAGCAAGTAGAGATCCGAAACCTGAGGGTTCTGGGCGACGACAGTGCGTTCAGAGCAAACGACCAGTTTGATCTGGAAGTTGCAAAACTAGATTGCGTTCCAACTGGAATGATCATCAAACCTGAGAAGTGTGAGAGAACAAAGGATCCATCCGAGTTCAAACTTTTAGGTACGAAGTATCGTGACGGTCGCGT--TCATCGTGACACCAGTGAGTGGTTCAAG…	CAAAAGTGGCGTAACGTTTGGGATGGTATGGTTTGGTACTTTATCAACACGCCAATCTTAATGCCTGACGGCCGCATGTTTCGCAAGAGACGTGGCGTGCCTTCTGGGTCGTGGTGGACTCAGATGGTCGACTCAGTTGTGAATTACAT-CTTAGTCGAATACCTAACAGAGTGTCAGGGTGTCGAGGCGCGTGGATTACGTGTTCTTGGTGACGACAGTGCTTTCCGTTCAGCGGTCGAGTTCAGCCTCGAAAAAGCACAATCTGACTGTGAGCCAACTGGTATGATACTCAAGCCTGAGAAGTGCGAGAAAACAGAGGATCCCTCTGACTTCAAACTGCTTGGGACAACATACCGTG--GGTGCCATCCTCATCGTGATACGAATGAGTGGTTCAAG…	673	1781	KJ786413.1 Gremmeniella abietina RNA virus MS1 RNA-dependent RNA polymerase gene, complete cds
TRINITY_DN1154_c1_g1_i1	AY615211.1	70.521	614	177	4	42	653	1023	1634	1.72e-73	277	AY615211.1	306	433	433	4	70.52	1	1	CAGAAATGGCGCAACGTTTGGGATGCCATGGTGTGGTATTTCATTAACACTCCCATTTTGATGCCGGACGGACGTATGTTCCGTAAGTACCGGGGTGTACCTTCCGGATCTTGGTGGACGCAGATTATCGACTCAGTAGTGAACCACATACTTA-TCGATTATCTTGCAGACTGCCAGCAAGTAGAGATCCGAAACCTGAGGGTTCTGGGCGACGACAGTGCGTTCAGAGCAAACGACCAGTTTGATCTGGAAGTTGCAAAACTAGATTGCGTTCCAACTGGAATGATCATCAAACCTGAGAAGTGTGAGAGAACAAAGGATCCATCCGAGTTCAAACTTTTAGGTACGAAGTATCGTGACGGTCGCGTTCATCGTGACACCAGTGAGTGGTTCAAGCT…	CAAAAGTGGCGTAACGTTTGGGATGGTATGGTTTGGTACTTCATCAACACGCCTATCTTAAATCCTGACGGCCGCATGTTTCGCAAGAGACGTGGCGTGCCTTCTGGGTCGTGGTGGACCCAGATGGTCGACTCAGTTGTGAATTACAT-CTTAGTCGAATACCTTACAGAGTGTCAGGGTGTCGAAGCACGTGGATTACGCGTGCTTGGCGACGACAGTGCTTTCCGTTCACCGGTCGAGTTCAGCCTCGAACAAGCACAATCTGACTGTGAGCCAACGGGTATGATACTCAAGCCTGAGAAGTGCGAGAAAACAGAGGATCCCTCTGACTTCAAATTGCTTGGTACGACATACCGTGAGTGCCATCCTCATCGTGATACGAATGAGTGGTTCAAGCT…	673	1781	AY615211.1 Gremmeniella abietina RNA virus MS2 unnamed segment, complete sequence
TRINITY_DN1154_c1_g1_i1	NC_004018.1	70.617	616	173	6	42	653	1023	1634	6e-73	275	NC_004018.1	304	435	435	8	70.62	1	1	CAGAAATGGCGCAACGTTTGGGATGCCATGGTGTGGTATTTCATTAACACTCCCATTTTGATGCCGGACGGACGTATGTTCCGTAAGTACCGGGGTGTACCTTCCGGATCTTGGTGGACGCAGATTATCGACTCAGTAGTGAACCACATACTTA-TCGATTATCTTGCAGACTGCCAGCAAGTAGAGATCCGAAACCTGAGGGTTCTGGGCGACGACAGTGCGTTCAGAGCAAACGACCAGTTTGATCTGGAAGTTGCAAAACTAGATTGCGTTCCAACTGGAATGATCATCAAACCTGAGAAGTGTGAGAGAACAAAGGATCCATCCGAGTTCAAACTTTTAGGTACGAAGTATCGTGACGGTCGCGT--TCATCGTGACACCAGTGAGTGGTTCAAG…	CAAAAGTGGCGTAACGTTTGGGATGGTATGGTTTGGTACTTCATCAACACGCCTATCTTAATGCCTGACGGCCGCATGTTTCGCAAGAGACGTGGCGTGCCTTCTGGGTCGTGGTGGACCCAGATGGTCGACTCAGTTGTGAATTACAT-CTTAGTCGAATACCTTACAGAGTGTCAGGGTGTCGAAGCACGTGGGTTACGCGTGCTTGGCGACGACAGTGCTTTCCGTTCACCGGTCGAGTTCAGCCTCGAACAAGCGCAATCTGACTGTGAGCCAACGGGTATGATACTCAAGCCTGAGAAGTGCGAGAAAACAGAGGATCCCTCTGACTTCAAACTGCTTGGGACGACATACCGTG--GGTGCCATCCTCATCGTGATACGAATGAGTGGTTCAAG…	673	1782	NC_004018.1 Gremmeniella abietina RNA virus MS1 RNA 1, complete genome
TRINITY_DN1154_c1_g1_i1	KY207543.1	67.395	641	203	4	36	673	1017	1654	1.08e-50	201	KY207543.1	222	432	432	6	67.39	1	1	GATGCTCAGAAATGGCGCAACGTTTGGGATGCCATGGTGTGGTATTTCATTAACACTCCCATTTTGATGCCGGACGGACGTATGTTCCGTAAGTACCGGGGTGTACCTTCCGGATCTTGGTGGACGCAGATTATCGACTCAGTAGTGAACCACATACTTATCGATTATCTTGCAGACTGCCAGCAAGTAG-AGATCCGAAACCTGAGGGTTCTGGGCGACGACAGTGCGTTCAGAGCAAACGACCAGTTTGATCTGGAAGTTGCAAAACTAGATTGCGTTCCA--ACTGGAATGATCATCAAACCTGAGAAGTGTGAGAGAACAAAGGATCCATCCGAGTTCAAACTTTTAGGTACGAAGTATCGTGACGGTCGCGTTCATCGTGACACCAGTGAGTGG…	GAGGCCCAGAAGTGGCGTAACGTTTGGGATGCTATGGTCTATTACTTTATAAACACACCGATGCTCATGCCTGACGGAAGAATGTTCCGTAAGAGGAGAGGTGTACCATCCGGATCGTGGTGGACCCAGATGATTGACAGTGTTGTGAATTACATACTTGTTGATTATCTGACTCAATGTCAA-ACGTGTCAGATACGTGGACTCAGAGTGTTAGGTGACGATTCAGCGTTTCGTTCTTGCCATGATTTTAGCTTAGATCAGGCGAGCGCTGATGCAGCAGCAGTATTG--ATGATACTGAATCCCGATAAATGTGAGGTTACTCTGGACCCCACAAAATTCAAGTTGCTTGGAACAACGTATGAGGACGGCCATCCTCATCGTGAAACAATCGACTGG…	673	1761	KY207543.1 Pseudogymnoascus destructans partitivirus-pa isolate LB-01 segment RNA1, complete sequence
TRINITY_DN1154_c1_g1_i1	NC_030480.1	67.395	641	203	4	36	673	960	1597	1.08e-50	201	NC_030480.1	222	432	432	6	67.39	1	1	GATGCTCAGAAATGGCGCAACGTTTGGGATGCCATGGTGTGGTATTTCATTAACACTCCCATTTTGATGCCGGACGGACGTATGTTCCGTAAGTACCGGGGTGTACCTTCCGGATCTTGGTGGACGCAGATTATCGACTCAGTAGTGAACCACATACTTATCGATTATCTTGCAGACTGCCAGCAAGTAG-AGATCCGAAACCTGAGGGTTCTGGGCGACGACAGTGCGTTCAGAGCAAACGACCAGTTTGATCTGGAAGTTGCAAAACTAGATTGCGTTCCA--ACTGGAATGATCATCAAACCTGAGAAGTGTGAGAGAACAAAGGATCCATCCGAGTTCAAACTTTTAGGTACGAAGTATCGTGACGGTCGCGTTCATCGTGACACCAGTGAGTGG…	GAGGCCCAGAAGTGGCGTAACGTTTGGGATGCTATGGTCTATTACTTTATAAACACACCGATGCTCATGCCTGACGGAAGAATGTTCCGTAAGAGGAGAGGTGTACCATCCGGATCGTGGTGGACCCAGATGATTGACAGTGTTGTGAATTACATACTTGTTGATTATCTGACTCAATGTCAA-ACGTGTCAGATACGTGGACTCAGAGTGTTAGGTGACGATTCAGCGTTTCGTTCTTGCCATGATTTTAGCTTAGATCAGGCGAGCGCTGATGCAGCAGCAGTATTG--ATGATACTGAATCCCGATAAATGTGAGGTTACTCTGGACCCCACAAAATTCAAGTTGCTTGGAACAACGTATGAGGACGGCCATCCTCATCGTGAAACAATCGACTGG…	673	1682	NC_030480.1 Pseudogymnoascus destructans virus isolate PdV80251 RNA-dependent RNA polymerase gene, complete cds
TRINITY_DN1154_c1_g1_i1	NC_003885.1	73.026	152	41	0	54	205	928	1079	4.93e-17	89.7	NC_003885.1	98	111	111	0	73.03	1	1	AACGTTTGGGATGCCATGGTGTGGTATTTCATTAACACTCCCATTTTGATGCCGGACGGACGTATGTTCCGTAAGTACCGGGGTGTACCTTCCGGATCTTGGTGGACGCAGATTATCGACTCAGTAGTGAACCACATACTTATCGATTATCT	AATGTGTGGGATGGTATGGTGTACTACTTTATCAATACCCCCATCTTGATGCCTGATGGAAGGATGTTCCGCAAGAGACGCGGTGTGCCTTCTGGCTCTTGGTGGACCCAACTTGTTGACAGCGTGGTCAACTGGATACTTGTGAAGTATCT	673	1645	NC_003885.1 Mycovirus FusoV RNA 1, complete sequence
TRINITY_DN1122_c0_g1_i1	KF438736.1	78.947	57	12	0	16	72	833	889	5.44e-05	50	KF438736.1	54	45	45	0	78.95	1	1	ATAAAAAATTAGACCAATATAAAAAAAAAAAAAAAAAAAAAAAGAAGAAGAAGAAGG	ATAAAAAAAGACAAAAAAACAAAAAAACACAAAAAGACAAAAAAAAGAAGAAGAAGG	839	3972	KF438736.1 Rice grassy stunt virus isolate KL013 P2 (P2) and membrane protein (Pc2) genes, complete cds
TRINITY_DN1122_c0_g1_i1	NC_023015.1	88.571	35	4	0	36	70	771	805	0.000663	46.4	NC_023015.1	50	31	31	0	88.57	1	1	AAAAAAAAAAAAAAAAAAAAAAAGAAGAAGAAGAA	AAAAAGAAGAAAAAAAAATAAAAAAAGAAGAAGAA	839	1348	NC_023015.1 Hedyotis uncinella yellow mosaic betasatellite isolate VN1, complete genome
TRINITY_DN1122_c0_g1_i1	KF438700.1	88.571	35	4	0	36	70	850	884	0.000663	46.4	KF438700.1	50	31	31	0	88.57	1	1	AAAAAAAAAAAAAAAAAAAAAAAGAAGAAGAAGAA	AAAAACACAAAAAGACAAAAAAAGAAGAAGAAGAA	839	3952	KF438700.1 Rice grassy stunt virus isolate SK004 P2 (P2) and membrane protein (Pc2) genes, complete cds
TRINITY_DN1122_c0_g1_i1	KF438688.1	88.571	35	4	0	36	70	850	884	0.000663	46.4	KF438688.1	50	31	31	0	88.57	1	1	AAAAAAAAAAAAAAAAAAAAAAAGAAGAAGAAGAA	AAAAACACAAAAAGATAAAAAAAGAAGAAGAAGAA	839	3951	KF438688.1 Rice grassy stunt virus isolate KL003 P2 (P2) and membrane protein (Pc2) genes, complete cds
TRINITY_DN1171_c2_g1_i1	KY883335.1	71.818	110	24	2	2529	2634	1939	2045	1.4e-06	57.2	KY883335.1	62	79	79	7	71.82	1	1	TCGCTGACCCATTATACAAAAGGTACGCCGTCACCCGTTTCCAGG----CTCCGACTGTTTGTATGCATGCGGTTTCAGGATCTATTTCACTCCCCTCCCGGGGTTCTTT	TCGCCGGCTCATTCTTCAACAGGCACGCGGTCA---GAGCCCAGGGCTCCTCCCACTGCTTGGGAGCTTACGGTTTCATGTTCTATTTCACTCCCCGATGGGGGTTCTTT	3131	2045	KY883335.1 Prunus necrotic ringspot virus isolate Q15R3N segment RNA3, complete sequence
TRINITY_DN1171_c2_g1_i2	KY883335.1	71.818	110	24	2	2538	2643	1939	2045	1.41e-06	57.2	KY883335.1	62	79	79	7	71.82	1	1	TCGCTGACCCATTATACAAAAGGTACGCCGTCACCCGTTTCCAGG----CTCCGACTGTTTGTATGCATGCGGTTTCAGGATCTATTTCACTCCCCTCCCGGGGTTCTTT	TCGCCGGCTCATTCTTCAACAGGCACGCGGTCA---GAGCCCAGGGCTCCTCCCACTGCTTGGGAGCTTACGGTTTCATGTTCTATTTCACTCCCCGATGGGGGTTCTTT	3140	2045	KY883335.1 Prunus necrotic ringspot virus isolate Q15R3N segment RNA3, complete sequence
TRINITY_DN1134_c0_g1_i1	AJ418777.1	88.095	42	2	2	1424	1462	1598	1639	0.000369	48.2	AJ418777.1	52	37	37	3	88.1	1	1	AAACCATAAAA--AAAAATACACTAG-AATAAAAATCAAAAA	AAACCATAAAACAAAAAATAAAATAGGAATAAAAATCAAAAA	1605	2958	AJ418777.1 Tomato spotted wilt virus NSs gene and N gene, genomic RNA, isolate BS97
TRINITY_DN1185_c0_g1_i1	NC_003688.1	92.201	1295	101	0	1	1295	5435	4141	0	1880	NC_003688.1	2084	1194	1194	0	92.2	1	-1	CGTTGATATTGCACTCACTCACCAGTTGTTAACATGGCGAGTTTTTCTGACTGTGCGCTAAGCTTCTTCAATGCTCCGCCAGTAAGAGAGGAAGTTGAGGAAAGAAATCCCCATTTCTTCCTGCTATCCATTACTTTTGCTTCTCTACGCTCGAGCATATCTCTTCCCTCGTGAATACTCCCTCCTGCGAGTACTGTTGCTGCGGCGACGTCCGCTTTGGAGTATCCAGGTGCTAGATCGGGCCTCCACGCCTCAATCAAATCAGGTTCGGGATTGAACTCAGTGATGGTTCGAGTAGGCTGTGGTCTTGGTAAGCCCTTTGGCTTGAGGTTGCCACGAAGACGAGAGCTTGTAGACGCTCGATCATCCTCAGTGGTCCCGGCTACAGAAGCACGGGAA…	CGTTGATATTGCACTCGCTCGCCAGTTGTCAATGTGGCGAGCTTTTCCGATTGTGCGCTGAGCTTCTTCAATGCTCCGCTAGTAAGAGAGGAAGTTGAGGAGAGGATTCCCCATTTCTTCCTACTATCCATTACTTTTGCTTCTCTACGCTCGAGCATATCTCTTCCCTCGTGGACACTTCCTCCTGCGAGCACTGTCGCTGCGGCGACGTCCGCTTTGGAGTATCCAGGTGCTAGATCGGGCCTCCACACCTCTATCAAATCAGGTCCAGGATTGAACTCGGTAATGGTTCGAGTAGGCTGTGGTTTTGGTAGCCCCTTTGGCTTGAGGTTGCCGCGAAGACGAGAGCTTGTAGACGCTCGATCATCCTCGGCAGTCCCGGCTTCGGAGGCACGGGAA…	1296	5669	NC_003688.1 Cucurbit aphid-borne yellows virus, complete genome
TRINITY_DN1185_c0_g1_i1	JF939813.1	91.224	1299	111	1	1	1296	5441	4143	0	1828	JF939813.1	2026	1185	1185	3	91.22	1	-1	CGTTGATATTGCACTCACTCACCAGTTGTTAACATGGCGAGTTTTTCTGACTGTGCGCTAAGCTTCTTCAATGCTCCGCCAGTAAGAGAGGAAGTTGAGGAAAGAAATCCCCATTTCTTCCTGCTATCCATTACTTTTGCTTCTCTACGCTCGAGCATATCTCTTCCCTCGTGAATACTCCCTCCTGCGAGTACTGTTGCTGCGGCGACGTCCGCTTTGGAGTATCCAGGTGCTAGATCGGGCCTCCACGCCTCAATCAAATCAGGTTCGGGATTGAACTCAGTGATGGTTCGAGTAGGCTGTGGTCTTGGTAAGCCCTTTGGCTTGAGGTTGCCACGAAGACGAGAGCTTGTAGACGCTCGATCATCCTCAGTGGTCCCGGCTACAGAAGCACGGGAA…	CGTTGATATTGCACTCGCTCGCCAGTTGATAACATGGCAAGCTTTTCCGACTGTGCGCTGAGCTTCTTCAATGCTCCGCTAGTAAGAGAGGATGTTGAGGAAAGGATTCCCCATTTCTTCCTACTATCCATTACTTTTGCTTCTCTACGCTCGAGCATATCTCTGCCCTCGTGGATACTCCCTCCTGCGATCACTGTCGCTGCGGCGACGTCCGCTTTGGAATATCCAGGTGCTAGATCAGGCCTCCACGCCTCTATTAGATCAGGTTCAGGATTGAACTCAGTGATGGTTCGAGTAGGCTGTGGTTTTGGTAGGCCTTTTGGCTTGAGGTTGCCACGAAGACGAGAGCTTGTAGACGCTCGATCATCCTCAGTGGTCCCGGCTGCTGAGGCGCGGGAA…	1296	5675	JF939813.1 Cucurbit aphid-borne yellows virus strain Sq/2005/9.2, complete genome
TRINITY_DN1185_c0_g1_i1	JF939814.1	91.281	1296	113	0	1	1296	5438	4143	0	1828	JF939814.1	2026	1183	1183	0	91.28	1	-1	CGTTGATATTGCACTCACTCACCAGTTGTTAACATGGCGAGTTTTTCTGACTGTGCGCTAAGCTTCTTCAATGCTCCGCCAGTAAGAGAGGAAGTTGAGGAAAGAAATCCCCATTTCTTCCTGCTATCCATTACTTTTGCTTCTCTACGCTCGAGCATATCTCTTCCCTCGTGAATACTCCCTCCTGCGAGTACTGTTGCTGCGGCGACGTCCGCTTTGGAGTATCCAGGTGCTAGATCGGGCCTCCACGCCTCAATCAAATCAGGTTCGGGATTGAACTCAGTGATGGTTCGAGTAGGCTGTGGTCTTGGTAAGCCCTTTGGCTTGAGGTTGCCACGAAGACGAGAGCTTGTAGACGCTCGATCATCCTCAGTGGTCCCGGCTACAGAAGCACGGGAA…	CGTTGATATTGCACTCGCTCGCCAGTTGATAACATGGCAAGCTTTTCCGACTGTGCGCTGAGCTTCTTCAATGCTCCGCTAGTAAGAGAGGAAGTTGAAGAAAGGATTCCCCATTTCTTCCTACTATCCATTACTTTTGCTTCTCTACGCTCGAGCATATCTCTTCCCTCGTGGATACTCCCTCCTGCGATCACTGTCGCTGCGGCGACGTCCGCTTTGGAGTATCCAGGTGCTAGATCAGGCCTCCACGCCTCTATTAGATCAGGTTCAGGATTGAACTCAGCGATGGTTCGAGTAGGCTGTGGTTTTGGTAGGCCTTTTGGCTTGAGGTTGCCACGAAGACGAGAGCTTGTAGACGCTCGATCATCCTCAGTGGTCCCGGCTGCTGAGGCACGGGAA…	1296	5672	JF939814.1 Cucurbit aphid-borne yellows virus strain Sq/2004/1.9, complete genome
TRINITY_DN1185_c0_g1_i1	JF939812.1	90.972	1296	117	0	1	1296	5438	4143	0	1810	JF939812.1	2006	1179	1179	0	90.97	1	-1	CGTTGATATTGCACTCACTCACCAGTTGTTAACATGGCGAGTTTTTCTGACTGTGCGCTAAGCTTCTTCAATGCTCCGCCAGTAAGAGAGGAAGTTGAGGAAAGAAATCCCCATTTCTTCCTGCTATCCATTACTTTTGCTTCTCTACGCTCGAGCATATCTCTTCCCTCGTGAATACTCCCTCCTGCGAGTACTGTTGCTGCGGCGACGTCCGCTTTGGAGTATCCAGGTGCTAGATCGGGCCTCCACGCCTCAATCAAATCAGGTTCGGGATTGAACTCAGTGATGGTTCGAGTAGGCTGTGGTCTTGGTAAGCCCTTTGGCTTGAGGTTGCCACGAAGACGAGAGCTTGTAGACGCTCGATCATCCTCAGTGGTCCCGGCTACAGAAGCACGGGAA…	CGTTGATATTGCACTCGCTCGCCAGTTGATAACATGGCAAGCTTTTCCGACTGTGCGCTGAGCTTCTTCAATGCTCCGCTAGTAAGAGAGGAAGTTGAGGAAAGGATTCCCCATTTCTTCCTACTATCCATTACTTTTGCTTCTCTACGCTCGAGCATATCTCTTCCCTCGTGGATACTCCCTCCTGCGATCACTGTCGCTGCGGCGACGTCCGCTTTGGAATATCCAGGTGCTAGATCAGGCCTCCACGCCTCTATCAAATCAGGTTCAGGATTGAACTCAGTGATGGTTCGAGTAGGCTGTGGTTTTGGGAGGCCCTTTGGCTTGAGGTTTCCACGAAGACGAGAGCTTGTTGACGCTCGATCATCCTCAGTGGTCCCGGCTGCCGAGGCACGGGAA…	1296	5672	JF939812.1 Cucurbit aphid-borne yellows virus strain Sq/2003/7.2, complete genome
TRINITY_DN1185_c0_g1_i1	EU636992.1	87.988	1282	151	1	18	1296	5427	4146	0	1617	EU636992.1	1792	1128	1128	3	87.99	1	-1	CTCACCAGTTGTTAACATGGCGAGTTTTTCTGACTGTGCGCTAAGCTTCTTCAATGCTCCGCCAGTAAGAGAGGAAGTTGAGGAAAGAAATCCCCATTTCTTCCTGCTATCCATTACTTTTGCTTCTCTACGCTCGAGCATATCTCTTCCCTCGTGAATACTCCCTCCTGCGAGTACTGTTGCTGCGGCGACGTCCGCTTTGGAGTATCCAGGTGCTAGATCGGGCCTCCACGCCTCAATCAAATCAGGTTCGGGATTGAACTCAGTGATGGTTCGAGTAGGCTGTGGTCTTGGTAAGCCCTTTGGCTTGAGGTTGCCACGAAGACGAGAGCTTGTAGACGCTCGATCATCCTCAGTGGTCCCGGCTACAGAAGCACGGGAAATACCCTTCCATAAATC…	CTCACCAGTTGTCAACTTGGCAAGCTTCTCCGACTGCGCGCTGAGTTTCTTTAGAGAACCGCTAGTGAGAGAGGAGGCTGAGGAAAGAATTCCCCATTTCTTCCTGCTATCCATCACTTTCTCGTCTCTTCGCCTGAGCATATCTCGTCCCTCGTGGATGCTCCCTCCTGCGATCACGGTCGCTGCTGCGACGTCCGCTTTGGAGTATCCAGGTGCTAGGTCAGGCCTCCACGCCTCCACCAAATCTGGATTAGGATTGAACTTAGTTATAGTCCGGGTGGGCTGTGGTTTTGGCAGGCCTTGTGGCTTGAGGTTACCACGAAGACGAGAGCTTGTTGACGCTCGATCATCTTCTGTGGTCCCGGTTTCAGAACCCCGGGAAATACCCTTCCAAATATC…	1296	5682	EU636992.1 Cucurbit aphid-borne yellows virus from China: Xinjiang, complete genome
TRINITY_DN1185_c0_g1_i1	KR231947.1	87.988	1282	151	1	18	1296	5427	4146	0	1617	KR231947.1	1792	1128	1128	3	87.99	1	-1	CTCACCAGTTGTTAACATGGCGAGTTTTTCTGACTGTGCGCTAAGCTTCTTCAATGCTCCGCCAGTAAGAGAGGAAGTTGAGGAAAGAAATCCCCATTTCTTCCTGCTATCCATTACTTTTGCTTCTCTACGCTCGAGCATATCTCTTCCCTCGTGAATACTCCCTCCTGCGAGTACTGTTGCTGCGGCGACGTCCGCTTTGGAGTATCCAGGTGCTAGATCGGGCCTCCACGCCTCAATCAAATCAGGTTCGGGATTGAACTCAGTGATGGTTCGAGTAGGCTGTGGTCTTGGTAAGCCCTTTGGCTTGAGGTTGCCACGAAGACGAGAGCTTGTAGACGCTCGATCATCCTCAGTGGTCCCGGCTACAGAAGCACGGGAAATACCCTTCCATAAATC…	CTCACCAGTTGTTAACTTGGCAAGTTTCTCCGACTGTGCGCTGAGCTTCTTTAGAGAACCGCTAGTGAGAGAGGAAGCTGAGGAAAGAATTCCCCATTTCTTCCTGCTATCCATCACTTTCTCGTCCCTTCGTCTGAGCATATCTCGTCCCTCGTGGATACTCCCTCCCGCGATCACGGTCGCTGCTGCGACGTCCGCTTTGGAATATCCGGGTGCTAGATCAGGCCTCCACGCCTCAATCAAATCTGGATTAGGATTAAATTCGGTTATAGTCCTGGTGGGCTGTGGTTTTGGTAGGCCTCGTGGCTTGAGGTTACCACGAAGACGAGAGCTGGTTGACGCTCGATCATCTTCCGTGGTCCCGGTTCCAGAACCCCGGGAAATACCCTTCCAAATGTC…	1296	5682	KR231947.1 Cucurbit aphid-borne yellows virus isolate GS1, complete genome
TRINITY_DN1185_c0_g1_i1	KR231949.1	87.91	1282	152	1	18	1296	5427	4146	0	1611	KR231949.1	1786	1127	1127	3	87.91	1	-1	CTCACCAGTTGTTAACATGGCGAGTTTTTCTGACTGTGCGCTAAGCTTCTTCAATGCTCCGCCAGTAAGAGAGGAAGTTGAGGAAAGAAATCCCCATTTCTTCCTGCTATCCATTACTTTTGCTTCTCTACGCTCGAGCATATCTCTTCCCTCGTGAATACTCCCTCCTGCGAGTACTGTTGCTGCGGCGACGTCCGCTTTGGAGTATCCAGGTGCTAGATCGGGCCTCCACGCCTCAATCAAATCAGGTTCGGGATTGAACTCAGTGATGGTTCGAGTAGGCTGTGGTCTTGGTAAGCCCTTTGGCTTGAGGTTGCCACGAAGACGAGAGCTTGTAGACGCTCGATCATCCTCAGTGGTCCCGGCTACAGAAGCACGGGAAATACCCTTCCATAAATC…	CTCACCAGTTGTCAGCTTGGCAAGCTTCTCCGACTGTGCGCTGAGTTTCTTTAGAGAACCGCTAGTGAGAGAGGAGGCTGAGGAAAGAATTCCCCATTTCTTCCTGCTATCCATCACTTTCTCGTCTCTTCGCCTAAGCATATCTCGTCCCTCGTGGATGCTCCCTCCTGCGATCACGGTCGCCGCTGCGACGTCCGCTTTGGAGTATCCAGGTGCTAGGTCAGGCCTCCACGCCTCCACCAAATCTGGATTAGGATTGAACTTGGTTATAGTCCGGGTGGGCTGTGGTTTTGGCAGGCCTTGTGGCTTGAGGTTACCACGAAGACGAGAGCTCGTTGACGCTCGATCATCTTCTGTGGTCCCGGTTTCAGAACCCCGGGAAATACCCTTCCAAATGTC…	1296	5682	KR231949.1 Cucurbit aphid-borne yellows virus isolate GS6, complete genome
TRINITY_DN1185_c0_g1_i1	HQ439023.1	87.52	1282	157	1	18	1296	5436	4155	0	1590	HQ439023.1	1762	1122	1122	3	87.52	1	-1	CTCACCAGTTGTTAACATGGCGAGTTTTTCTGACTGTGCGCTAAGCTTCTTCAATGCTCCGCCAGTAAGAGAGGAAGTTGAGGAAAGAAATCCCCATTTCTTCCTGCTATCCATTACTTTTGCTTCTCTACGCTCGAGCATATCTCTTCCCTCGTGAATACTCCCTCCTGCGAGTACTGTTGCTGCGGCGACGTCCGCTTTGGAGTATCCAGGTGCTAGATCGGGCCTCCACGCCTCAATCAAATCAGGTTCGGGATTGAACTCAGTGATGGTTCGAGTAGGCTGTGGTCTTGGTAAGCCCTTTGGCTTGAGGTTGCCACGAAGACGAGAGCTTGTAGACGCTCGATCATCCTCAGTGGTCCCGGCTACAGAAGCACGGGAAATACCCTTCCATAAATC…	CTCACCAGTAGTCAACTTGGCAAGCTTCTCCGACTGTGCGCTGAGTTTCTTTAGAGAACCGCTAGTGAGAGAGGAAGCTGAGGAAAGAATTCCCCATTTCTTCCTGCTATCCATCACTTTCTCGTCTCTTCGCCTAAGCATATCTCGTCCCTCGTGGATGCTCCCTCCTGCGATCACGGTCGCTGCTGCGACGTCCGCTTTGGAGTATCCAGGTGCTAGGTCAGGCCTCCACGCCTCAATCAAATCTGGATTAGGTTCAAACTTGGTTATAGTCCGGGTGGGCTGTGGTTTTGGTAGGCCTTGTGGCTTGAGGTTACCACGAAGACGAGAGCTTGTTGATGCTCGATCATCTTCTGTGGTCCCGGTTTCAGAACCCCGGGAAATACCCTTCCAAATGTC…	1296	5691	HQ439023.1 Cucurbit aphid-borne yellows virus strain CABYV-CZ, complete genome
TRINITY_DN1185_c0_g1_i1	KR231952.1	87.441	1282	158	1	18	1296	5427	4146	0	1584	KR231952.1	1756	1121	1121	3	87.44	1	-1	CTCACCAGTTGTTAACATGGCGAGTTTTTCTGACTGTGCGCTAAGCTTCTTCAATGCTCCGCCAGTAAGAGAGGAAGTTGAGGAAAGAAATCCCCATTTCTTCCTGCTATCCATTACTTTTGCTTCTCTACGCTCGAGCATATCTCTTCCCTCGTGAATACTCCCTCCTGCGAGTACTGTTGCTGCGGCGACGTCCGCTTTGGAGTATCCAGGTGCTAGATCGGGCCTCCACGCCTCAATCAAATCAGGTTCGGGATTGAACTCAGTGATGGTTCGAGTAGGCTGTGGTCTTGGTAAGCCCTTTGGCTTGAGGTTGCCACGAAGACGAGAGCTTGTAGACGCTCGATCATCCTCAGTGGTCCCGGCTACAGAAGCACGGGAAATACCCTTCCATAAATC…	CTCACCAGTTGTTAACTTGGCAAGCTTCTCAGACTGCGCGCTGAGTTTCTTTAGAGAACCGCTAGTGAGAGAGGAGGCTGAGGAAAGAATTCCCCATTTCTTCCTGCTGTCCATCACTTTCTCGTCTCTTCGCCTAAGCATATCTCGTCCCTCGTGGATGCTCCCTCCTGCGATCACAGTTGCTGCTGCGACGTCCGCTTTGGAGTATCCAGGTGCTAGGTCAGGCCTCCACGCCTCCACCAAATCTGGATCAGGATTGAACTTGGTTATAGTCCGGGTGGGCTGTGGTTTTGGTAGGCCTTGTGGCTTGAGGTTACCACGGAGACGAGAGCTGGTTGACGCTCGATCATCTTCTGTGGTCCCGGTGTCAGAACCCCGGGAAATACCCTTCCAAATGTC…	1296	5682	KR231952.1 Cucurbit aphid-borne yellows virus isolate HS1, complete genome
TRINITY_DN1185_c0_g1_i1	EU000535.1	87.363	1282	159	1	18	1296	5427	4146	0	1581	EU000535.1	1752	1120	1120	3	87.36	1	-1	CTCACCAGTTGTTAACATGGCGAGTTTTTCTGACTGTGCGCTAAGCTTCTTCAATGCTCCGCCAGTAAGAGAGGAAGTTGAGGAAAGAAATCCCCATTTCTTCCTGCTATCCATTACTTTTGCTTCTCTACGCTCGAGCATATCTCTTCCCTCGTGAATACTCCCTCCTGCGAGTACTGTTGCTGCGGCGACGTCCGCTTTGGAGTATCCAGGTGCTAGATCGGGCCTCCACGCCTCAATCAAATCAGGTTCGGGATTGAACTCAGTGATGGTTCGAGTAGGCTGTGGTCTTGGTAAGCCCTTTGGCTTGAGGTTGCCACGAAGACGAGAGCTTGTAGACGCTCGATCATCCTCAGTGGTCCCGGCTACAGAAGCACGGGAAATACCCTTCCATAAATC…	CTCACCAGTAGTCAACTTGGCAAGCTTCTCTGACTGCGCGCTAAGCTTCCTTAGAGAACCGCTAGTGAGAGAGGAAGCTGAAGAAAGAACTCCCCATTTCTTCCTGCTATCCATCACTTTCTCGTCTCTTCGTCTGAGCATATCTCGTCCCTCGTGAATACTCCCTCCAGCGATCACAGTCGCCGCTGCGACGTCCGCTTTGGAGTATTCGGGTGCTAGGTCGGGCCTCCACGCCTCCACCAAATCCGGATTAGGATTGAACTGAGTTATAGTCCGGGTGGGCTGTGGTTTTGGAAGGCCCCGTGGCTTGAGGTTGCCACGAAGACGCGAGCTAGTAGATGCTCGGTCGTCTTCTGCGGTCCCGGATTCAGAACCTCGGGAAATACCCTTCCAAATGTC…	1296	5682	EU000535.1 Cucurbit aphid-borne yellows virus, complete genome
TRINITY_DN1185_c0_g1_i1	KR231950.1	87.363	1282	159	1	18	1296	5424	4143	0	1581	KR231950.1	1752	1120	1120	3	87.36	1	-1	CTCACCAGTTGTTAACATGGCGAGTTTTTCTGACTGTGCGCTAAGCTTCTTCAATGCTCCGCCAGTAAGAGAGGAAGTTGAGGAAAGAAATCCCCATTTCTTCCTGCTATCCATTACTTTTGCTTCTCTACGCTCGAGCATATCTCTTCCCTCGTGAATACTCCCTCCTGCGAGTACTGTTGCTGCGGCGACGTCCGCTTTGGAGTATCCAGGTGCTAGATCGGGCCTCCACGCCTCAATCAAATCAGGTTCGGGATTGAACTCAGTGATGGTTCGAGTAGGCTGTGGTCTTGGTAAGCCCTTTGGCTTGAGGTTGCCACGAAGACGAGAGCTTGTAGACGCTCGATCATCCTCAGTGGTCCCGGCTACAGAAGCACGGGAAATACCCTTCCATAAATC…	CTCACCAGTTGTCAACTTGGCAAGCTTCTCCGACTGCGCGCTGAGTTTCTTCAGAGAACCGCTAGTGAGAGAGGAGGCTGAGGAAAGAATTCCCCATTTCTTCCTGCTATCCATCACTTTCTCGTCTCTTCGACTAAGCATATCTCGTCCCTCGTGGATGCTCCCTCCTGCGATCACAGTCGCTGCTGCGACGTCCGCTTTGGAGTATCCAGGTGCTAGGTCAGGCCTCCACGCCTCCACCAAATCTGGATTAGGATTGAACTTGGTTATAGTCCGGGTGGGCTGTGGTTTTGGTAGGCCTTGTGGCTTAAGGTTACCACGAAGACGAGAGCTGGTTGACGCTCGATCATCTTCTGTGGTCCCGGTTTCAGAACCCCGGGAAATACCCTTCCAAATGTC…	1296	5680	KR231950.1 Cucurbit aphid-borne yellows virus isolate HD1, complete genome
TRINITY_DN1185_c0_g1_i1	KR231951.1	87.285	1282	160	1	18	1296	5427	4146	0	1575	KR231951.1	1746	1119	1119	3	87.29	1	-1	CTCACCAGTTGTTAACATGGCGAGTTTTTCTGACTGTGCGCTAAGCTTCTTCAATGCTCCGCCAGTAAGAGAGGAAGTTGAGGAAAGAAATCCCCATTTCTTCCTGCTATCCATTACTTTTGCTTCTCTACGCTCGAGCATATCTCTTCCCTCGTGAATACTCCCTCCTGCGAGTACTGTTGCTGCGGCGACGTCCGCTTTGGAGTATCCAGGTGCTAGATCGGGCCTCCACGCCTCAATCAAATCAGGTTCGGGATTGAACTCAGTGATGGTTCGAGTAGGCTGTGGTCTTGGTAAGCCCTTTGGCTTGAGGTTGCCACGAAGACGAGAGCTTGTAGACGCTCGATCATCCTCAGTGGTCCCGGCTACAGAAGCACGGGAAATACCCTTCCATAAATC…	CTCACCAGTTGTCAACTTGGCAAGCTTCTCCGACTGCGCGCTGAGTTTCTTCAGAGAACCGCTAGTGAGAGAGGAGGCTGAGGAAAGAATTCCCCATTTCTTCCTGCTATCCATCACTTTCTCGTCTCTTCGACTAAGCATATCTCGTCCCTCGTGGATGCTCCCTCCTGCGATCACAGTCGCTGCTGCGACGTCCGCTTTGGAGTATCCAGGTGCTAGGTCAGGCCTCCACGCCTCCACCAAATCTGGATTAGGATTGAACTTGGTTATAGTCCGGGTGGGCTGTGGTTTTGGTAGGCCTTGTGGCTTAAGGTTACCACGAAGACGAGAGCTGGTTGACGCTCGATCATCTTCTGTGGTCCCGGTTTCAGAACCCCGGGAAATACCCTTCCAAATGTC…	1296	5683	KR231951.1 Cucurbit aphid-borne yellows virus isolate HD118, complete genome
TRINITY_DN1185_c0_g1_i1	LC082306.1	87.137	1275	161	1	18	1289	5427	4153	0	1559	LC082306.1	1728	1111	1111	3	87.14	1	-1	CTCACCAGTTGTTAACATGGCGAGTTTTTCTGACTGTGCGCTAAGCTTCTTCAATGCTCCGCCAGTAAGAGAGGAAGTTGAGGAAAGAAATCCCCATTTCTTCCTGCTATCCATTACTTTTGCTTCTCTACGCTCGAGCATATCTCTTCCCTCGTGAATACTCCCTCCTGCGAGTACTGTTGCTGCGGCGACGTCCGCTTTGGAGTATCCAGGTGCTAGATCGGGCCTCCACGCCTCAATCAAATCAGGTTCGGGATTGAACTCAGTGATGGTTCGAGTAGGCTGTGGTCTTGGTAAGCCCTTTGGCTTGAGGTTGCCACGAAGACGAGAGCTTGTAGACGCTCGATCATCCTCAGTGGTCCCGGCTACAGAAGCACGGGAAATACCCTTCCATAAATC…	CTCGCCAGTTGTTAACTTGGCAAGCTTTTCCGACTGCGCGCTGAGTTTCTTTAGAGAACCGCTAGTGAGAGAGGAAGCTGAGGAAAGAATTCCCCATTTCTTCCTACTATCCATCACTTTCTCATCTCTTCGCCTAAGCATATCTCGTCCTTCGTGGATGCTCCCTCCTGCGATCACAGTCGCTGCTGCGACGTCCGCTTTGGAGTATCCAGGTGCTAGGTCAGGCCTCCACGCCTCCACCAAATCTGGATTAGGATTGAACTTGGTTATAGTCCGGGTGGGCTGTGGTTTTGGTAGGCCTTGTGGCTTGAGGTTACCACGAAGACGAGAGCTGGTTGATGCTCGATCATCTTCTGTGGTCCCGGTTTCAGAACCCCGGGAAATACCCTTCCAAATGTC…	1296	5688	LC082306.1 Cucurbit aphid-borne yellows virus genomic RNA, complete genome, isolate: K1
TRINITY_DN1185_c0_g1_i1	GQ221223.1	86.661	1282	168	1	18	1296	5427	4146	0	1539	GQ221223.1	1706	1111	1111	3	86.66	1	-1	CTCACCAGTTGTTAACATGGCGAGTTTTTCTGACTGTGCGCTAAGCTTCTTCAATGCTCCGCCAGTAAGAGAGGAAGTTGAGGAAAGAAATCCCCATTTCTTCCTGCTATCCATTACTTTTGCTTCTCTACGCTCGAGCATATCTCTTCCCTCGTGAATACTCCCTCCTGCGAGTACTGTTGCTGCGGCGACGTCCGCTTTGGAGTATCCAGGTGCTAGATCGGGCCTCCACGCCTCAATCAAATCAGGTTCGGGATTGAACTCAGTGATGGTTCGAGTAGGCTGTGGTCTTGGTAAGCCCTTTGGCTTGAGGTTGCCACGAAGACGAGAGCTTGTAGACGCTCGATCATCCTCAGTGGTCCCGGCTACAGAAGCACGGGAAATACCCTTCCATAAATC…	CTCACCAGTTGTCAACTTGGCAAGCTTCTCCGACTGCGCGCTGAGTTTCTTTAGAGAACCGCTAGTGAGAGAGGAGGCTGAGGAAAGAATTCCCCATTTCTTCCTGCTATCCATCACTTTCTCGTCTCTTCGCCTAAGCATATCTCGTCCCTCGTGGATGCTCCCTCCTGCGATCACGGTCGCTGCTGCGACGTCCGCTTTGGAGTATCCAGGTGCTAGGTCAGGCCTCCACGCCTCTACCAAATCTGGATCAGGATCAAATTTGGTTATAGTCCGGGTAGGCTGTGGTTTTGGTAGGCCTTGTGGCTTGAGGTTACCACGAAGACGAGAGCTGGTTGACGCTCGATCATCTTCTGTGGTCCCGGTTTCAGAGCCCCGGGAAATACCCTTCCAAATGTC…	1296	5682	GQ221223.1 Cucurbit aphid-borne yellows virus isolate CABYV-FJ, complete genome
TRINITY_DN1185_c0_g1_i1	KR231955.1	86.271	1282	173	1	18	1296	5427	4146	0	1517	KR231955.1	1682	1106	1106	3	86.27	1	-1	CTCACCAGTTGTTAACATGGCGAGTTTTTCTGACTGTGCGCTAAGCTTCTTCAATGCTCCGCCAGTAAGAGAGGAAGTTGAGGAAAGAAATCCCCATTTCTTCCTGCTATCCATTACTTTTGCTTCTCTACGCTCGAGCATATCTCTTCCCTCGTGAATACTCCCTCCTGCGAGTACTGTTGCTGCGGCGACGTCCGCTTTGGAGTATCCAGGTGCTAGATCGGGCCTCCACGCCTCAATCAAATCAGGTTCGGGATTGAACTCAGTGATGGTTCGAGTAGGCTGTGGTCTTGGTAAGCCCTTTGGCTTGAGGTTGCCACGAAGACGAGAGCTTGTAGACGCTCGATCATCCTCAGTGGTCCCGGCTACAGAAGCACGGGAAATACCCTTCCATAAATC…	CTCGCCAGTTGTCAACTTGGCGAGCTTTTCTGACTGTGCACTGAGTTTCTTTAAAGAGCCACTAGTGAGAGTGGAAACTGAGGAGAGAACTCCCCATTTCTTCCTGCTATCCATCACTGACTCTTCTCTTCGCCTTAGCATATCTCGTCCCTCGTGGATACTCCCTCCTGCGATCACGGTCGCTGCTGCGACGTCCGCTTTGGAGTATCCAGGTGCTAGATCAGGCCTCCACGCCTCCACCAAATCTGGATTAGGGTTGAACTGGGTTATAGTCCGGGTGGGCTGTGGTTTGGGTAGGCCTTGTGGCTTGAGGTTGCCGCGGAGACGAGAGCTTGTTGATGCTCGATCGTCTTCAGTGGTTTCGGTTTCCGAACCTCGAGAAATACCCTTCCAGATGTC…	1296	5682	KR231955.1 Cucurbit aphid-borne yellows virus isolate NW2, complete genome
TRINITY_DN1185_c0_g1_i1	KR231960.1	86.271	1282	173	1	18	1296	5427	4146	0	1517	KR231960.1	1682	1106	1106	3	86.27	1	-1	CTCACCAGTTGTTAACATGGCGAGTTTTTCTGACTGTGCGCTAAGCTTCTTCAATGCTCCGCCAGTAAGAGAGGAAGTTGAGGAAAGAAATCCCCATTTCTTCCTGCTATCCATTACTTTTGCTTCTCTACGCTCGAGCATATCTCTTCCCTCGTGAATACTCCCTCCTGCGAGTACTGTTGCTGCGGCGACGTCCGCTTTGGAGTATCCAGGTGCTAGATCGGGCCTCCACGCCTCAATCAAATCAGGTTCGGGATTGAACTCAGTGATGGTTCGAGTAGGCTGTGGTCTTGGTAAGCCCTTTGGCTTGAGGTTGCCACGAAGACGAGAGCTTGTAGACGCTCGATCATCCTCAGTGGTCCCGGCTACAGAAGCACGGGAAATACCCTTCCATAAATC…	CTCGCCAGTTGTCAGCTTGGCGAGCTTTTCTGACTGTGCACTGAGTTTCTTTAAAGAGCCACTAGTGAGAGTGGAAGCTGAGGAGAGAACTCCCCATTTCTTCCTGCTATCCATCACTAACTCTTCTCTTCGCCTGAGCATATCTCGTCCCTCGTGGATACTCCCTCCTGCGATCACGGTCGCTGCTGCGACGTCCGCTTTGGAGTATCCAGGTGCTAGATCAGGCCTCCACGCCTCCACCAAATCTGGATTAGGGTTGAACTGGGTTATAGTCCGGGTGGGCTGTGGTTTGGGTAGGCCTTGTGGCTTGAGGTTGCCGCGGAGACGAGAGCTTGTTGATGCTCGATCGTCTTCAGTGGTTTCGGTTTCCGAACCTCGAGAAATACCCTTCCAGATGTC…	1296	5682	KR231960.1 Cucurbit aphid-borne yellows virus isolate SW1(14), complete genome
TRINITY_DN1185_c0_g1_i1	KR231943.1	86.193	1282	174	1	18	1296	5427	4146	0	1512	KR231943.1	1676	1105	1105	3	86.19	1	-1	CTCACCAGTTGTTAACATGGCGAGTTTTTCTGACTGTGCGCTAAGCTTCTTCAATGCTCCGCCAGTAAGAGAGGAAGTTGAGGAAAGAAATCCCCATTTCTTCCTGCTATCCATTACTTTTGCTTCTCTACGCTCGAGCATATCTCTTCCCTCGTGAATACTCCCTCCTGCGAGTACTGTTGCTGCGGCGACGTCCGCTTTGGAGTATCCAGGTGCTAGATCGGGCCTCCACGCCTCAATCAAATCAGGTTCGGGATTGAACTCAGTGATGGTTCGAGTAGGCTGTGGTCTTGGTAAGCCCTTTGGCTTGAGGTTGCCACGAAGACGAGAGCTTGTAGACGCTCGATCATCCTCAGTGGTCCCGGCTACAGAAGCACGGGAAATACCCTTCCATAAATC…	CTCGCCAGTTGTCAACTTGGCGAGCTTTTCTGACTGTGCACTGAGTTTCTTTAAAGAGCCACTAGTGAGAGTGGAAGCTGAGGAGAGAACTCCCCATTTCTTCCTGCTATCCATCACTGACTCTTCTCTTCGCCTTAACATATCTCGTCCCTCGTGGATACTCCCTCCTGCGATCACGGTCGCTGCTGCGACGTCCGCTTTGGAGTATCCAGGTGCTAGATCAGGCCTCCACGCCTCCACCAAATCTGGATTAGGGTTGAACTGGGTTATAGTCCGGGTGGGCTGTGATTTGGGTAGGCCTTGTGGCTTGAGGTTGCCGCGGAGACGAGAGCTTGTTGATGCTCGATCGTCTTCAGTGGTTTCGGTTTCCGAACCTCGAGAAATACCCTTCCAGATGTC…	1296	5682	KR231943.1 Cucurbit aphid-borne yellows virus isolate CY4, complete genome
TRINITY_DN1185_c0_g1_i1	KR231944.1	86.193	1282	174	1	18	1296	5427	4146	0	1512	KR231944.1	1676	1105	1105	3	86.19	1	-1	CTCACCAGTTGTTAACATGGCGAGTTTTTCTGACTGTGCGCTAAGCTTCTTCAATGCTCCGCCAGTAAGAGAGGAAGTTGAGGAAAGAAATCCCCATTTCTTCCTGCTATCCATTACTTTTGCTTCTCTACGCTCGAGCATATCTCTTCCCTCGTGAATACTCCCTCCTGCGAGTACTGTTGCTGCGGCGACGTCCGCTTTGGAGTATCCAGGTGCTAGATCGGGCCTCCACGCCTCAATCAAATCAGGTTCGGGATTGAACTCAGTGATGGTTCGAGTAGGCTGTGGTCTTGGTAAGCCCTTTGGCTTGAGGTTGCCACGAAGACGAGAGCTTGTAGACGCTCGATCATCCTCAGTGGTCCCGGCTACAGAAGCACGGGAAATACCCTTCCATAAATC…	CTCGCCAGTTGTCAACTTGGCGAGCTTTTCTGATTGTGCACTGAGTTTCTTTAAAGAGCCAACAGTGAGAGTGGAAGCTGAGGAGAGAACTCCCCATTTCTTCCTGCTATCCATCACTGACTCTTCTCTTCGCCTGAGCATATCTCGTCCCTCGTGGATACTCCCTCCTGCGATCACGGTCGCTGCTGCGACGTCCGCTTTGGAGTATCCAGGTGCTAAATCAGGCCTCCACGCCTCCACCAAATCTGGATTAGGGTTGAACTGGGTTATAGTCCGGGTGGGCTGTGGTTTGGGTAGGCCTTGTGGCTTGAGGTTGCCGCGGAGACGAGAGCTTGTTGATGCTCGATCGTCTTCAGTGGTTTCGGTTTCCGAACCTCGAGAAATACCCTTCCAGATGTC…	1296	5684	KR231944.1 Cucurbit aphid-borne yellows virus isolate CY6, complete genome
TRINITY_DN1185_c0_g1_i1	KR231946.1	86.193	1282	174	1	18	1296	5424	4143	0	1512	KR231946.1	1676	1105	1105	3	86.19	1	-1	CTCACCAGTTGTTAACATGGCGAGTTTTTCTGACTGTGCGCTAAGCTTCTTCAATGCTCCGCCAGTAAGAGAGGAAGTTGAGGAAAGAAATCCCCATTTCTTCCTGCTATCCATTACTTTTGCTTCTCTACGCTCGAGCATATCTCTTCCCTCGTGAATACTCCCTCCTGCGAGTACTGTTGCTGCGGCGACGTCCGCTTTGGAGTATCCAGGTGCTAGATCGGGCCTCCACGCCTCAATCAAATCAGGTTCGGGATTGAACTCAGTGATGGTTCGAGTAGGCTGTGGTCTTGGTAAGCCCTTTGGCTTGAGGTTGCCACGAAGACGAGAGCTTGTAGACGCTCGATCATCCTCAGTGGTCCCGGCTACAGAAGCACGGGAAATACCCTTCCATAAATC…	CTCGCCAGTTGTCAACTTGGCGAGCTTTTCTGACTGTGCACTGAGTTTCTTTAAAGAGCCACTAGTGAGAGTGGAAGCTGAGGAGAGAACTCCCCATTTCTTCCTGCTATCCATCACTGACTCTTCTCTTCGCCTTAGCATATCTCGTCCCTCGTGGATACTCCCTCCTGCGATCACGGTCGCTGCTGCGACGTCCGCTTTGGAGTATCCAGGTGCTAGATCAGGCCTCCACGCCTCCACCAAATCTGGATTAGGGTTGAACTGGGTTATAGTCCGGGTGGGCTGTGGTTTGGGTAGGCCTTGTGGCTTGAGGTTGCCGCGGAGACGAGAGCTTGTTGATGCTCGATCGTCTTCAGTGGTTTCGGTTTCCGAACCTCGAGAAATACCCTTCCAGATGTC…	1296	5681	KR231946.1 Cucurbit aphid-borne yellows virus isolate GM16, complete genome
TRINITY_DN1185_c0_g1_i1	KR231948.1	86.193	1282	174	1	18	1296	5427	4146	0	1512	KR231948.1	1676	1105	1105	3	86.19	1	-1	CTCACCAGTTGTTAACATGGCGAGTTTTTCTGACTGTGCGCTAAGCTTCTTCAATGCTCCGCCAGTAAGAGAGGAAGTTGAGGAAAGAAATCCCCATTTCTTCCTGCTATCCATTACTTTTGCTTCTCTACGCTCGAGCATATCTCTTCCCTCGTGAATACTCCCTCCTGCGAGTACTGTTGCTGCGGCGACGTCCGCTTTGGAGTATCCAGGTGCTAGATCGGGCCTCCACGCCTCAATCAAATCAGGTTCGGGATTGAACTCAGTGATGGTTCGAGTAGGCTGTGGTCTTGGTAAGCCCTTTGGCTTGAGGTTGCCACGAAGACGAGAGCTTGTAGACGCTCGATCATCCTCAGTGGTCCCGGCTACAGAAGCACGGGAAATACCCTTCCATAAATC…	CTCGCCAGTTGTCAACTTGGCGAGCTTTTCTGACTGTGCGCTGAGTTTCTTTAAAGAGCCACTAGTGAGAGTGGAAGCTGAGGAGAGAACTCCCCATTTCTTCCTGCTATCCATCACTGACTCTTCTCTTCGCCTGAGCATATCTCGTCCCTCGTGGATACTCCCTCCTGCGATCACGGTCGCTGCTGCGACGTCCGCTTTGGAGTATCCAGGTGCTAAATCAGGCCTCCACGCCTCCACCAAATCTGGATTAGGGTTGAACTGGGTTATAGTCCGGGTGGGCTGTGGTTTGGGTAGGCCTTGTGGCTTGAGGTTGCCGCGGAGACGAGAGCTTGTTGATGCTCGATCGTCTTCAGTGGTTTCGGTTTCCGAACCTCGAGAAATACCCTTCCAGATGTC…	1296	5683	KR231948.1 Cucurbit aphid-borne yellows virus isolate GS2, complete genome
TRINITY_DN1185_c0_g1_i1	KR231953.1	86.193	1282	174	1	18	1296	5427	4146	0	1512	KR231953.1	1676	1105	1105	3	86.19	1	-1	CTCACCAGTTGTTAACATGGCGAGTTTTTCTGACTGTGCGCTAAGCTTCTTCAATGCTCCGCCAGTAAGAGAGGAAGTTGAGGAAAGAAATCCCCATTTCTTCCTGCTATCCATTACTTTTGCTTCTCTACGCTCGAGCATATCTCTTCCCTCGTGAATACTCCCTCCTGCGAGTACTGTTGCTGCGGCGACGTCCGCTTTGGAGTATCCAGGTGCTAGATCGGGCCTCCACGCCTCAATCAAATCAGGTTCGGGATTGAACTCAGTGATGGTTCGAGTAGGCTGTGGTCTTGGTAAGCCCTTTGGCTTGAGGTTGCCACGAAGACGAGAGCTTGTAGACGCTCGATCATCCTCAGTGGTCCCGGCTACAGAAGCACGGGAAATACCCTTCCATAAATC…	CTCGCCAGTTGTCAGCTTGGCGAGCTTTTCTGACTGTGCACTGAGTTTCTTTAAAGAGCCACTAGTGAGAGTGGAAGCTGAGGAGAGAACTCCCCATTTCTTCCTGCTATCCATCACTGACTCTTCTCTTCGCCTGAGCATATCTCGTCCCTCGTGGATACTCCCTCCTGCGATCACGGTCGCTGCTGCGACGTCCGCTTTGGAGTATCCAGGTGCTAGATCAGGCCTCCACGCCTCCACCAAATCTGGATTAGGGTTGAACTGGGTTATAGTCCGGGTGGGCTGTGGTTTGGGTAGGCCTCGTGGCTTGAGGTTGCCGCGGAGACGAGAGCTTGTTGATGCTCGATCGTCTTCAGTGGTTTCGGTTTCCGAACCTCGAGAAATACCCTTCCAGATGTC…	1296	5682	KR231953.1 Cucurbit aphid-borne yellows virus isolate HS2, complete genome
TRINITY_DN1185_c0_g1_i1	KR231954.1	86.193	1282	174	1	18	1296	5427	4146	0	1512	KR231954.1	1676	1105	1105	3	86.19	1	-1	CTCACCAGTTGTTAACATGGCGAGTTTTTCTGACTGTGCGCTAAGCTTCTTCAATGCTCCGCCAGTAAGAGAGGAAGTTGAGGAAAGAAATCCCCATTTCTTCCTGCTATCCATTACTTTTGCTTCTCTACGCTCGAGCATATCTCTTCCCTCGTGAATACTCCCTCCTGCGAGTACTGTTGCTGCGGCGACGTCCGCTTTGGAGTATCCAGGTGCTAGATCGGGCCTCCACGCCTCAATCAAATCAGGTTCGGGATTGAACTCAGTGATGGTTCGAGTAGGCTGTGGTCTTGGTAAGCCCTTTGGCTTGAGGTTGCCACGAAGACGAGAGCTTGTAGACGCTCGATCATCCTCAGTGGTCCCGGCTACAGAAGCACGGGAAATACCCTTCCATAAATC…	CTCGCCAGTTGTCAACTTGGCGAGCTTTTCTGACTGTGCACTGAGTTTCTTTAAAGAGCCACTAGTGAGAGTGGAAGCTGAGGAGAGAACTCCCCATTTCTTCCTGCTATCCATCACTGACTCTTCTCTTCGCCTTAGCATATCTCGTCCCTCGTGGATACTCCCTCCTGCGATCACGGTCGCTGCTGCGACGTCCGCTTTGGAGTATCCAGGTGCTAGATCAGGCCTCCACGCCTCCACCAAATCTGGATTAGGGTTGAACTGGGTTATAGTCCGGGTGGGCTGTGGTTTAGGTAGGCCTTGTGGCTTGAGGTTGCCGCGGAGACGAGAGCTTGTTGATGCTCGATCGTCTTCAGTGGTTTCGGTTTCCGAACCTCGAGAAATACCCTTCCAGATGTC…	1296	5683	KR231954.1 Cucurbit aphid-borne yellows virus isolate NW1, complete genome
TRINITY_DN1185_c0_g1_i1	KR231958.1	86.193	1282	174	1	18	1296	5427	4146	0	1512	KR231958.1	1676	1105	1105	3	86.19	1	-1	CTCACCAGTTGTTAACATGGCGAGTTTTTCTGACTGTGCGCTAAGCTTCTTCAATGCTCCGCCAGTAAGAGAGGAAGTTGAGGAAAGAAATCCCCATTTCTTCCTGCTATCCATTACTTTTGCTTCTCTACGCTCGAGCATATCTCTTCCCTCGTGAATACTCCCTCCTGCGAGTACTGTTGCTGCGGCGACGTCCGCTTTGGAGTATCCAGGTGCTAGATCGGGCCTCCACGCCTCAATCAAATCAGGTTCGGGATTGAACTCAGTGATGGTTCGAGTAGGCTGTGGTCTTGGTAAGCCCTTTGGCTTGAGGTTGCCACGAAGACGAGAGCTTGTAGACGCTCGATCATCCTCAGTGGTCCCGGCTACAGAAGCACGGGAAATACCCTTCCATAAATC…	CTCGCCAGTTGTCAACTTGGCGAGCTTTTCTGACTGTGCACTGAGTTTCTTTAAAGAGCCACTAGTGAGAGTGGAAGCTGAGGAGAGAACTCCCCATTTCTTCCTGCTATCCATCACTGACTCTTCTCTTCGCCTTAGCATATCTCGTCCCTCGTGGATACTCCCTCCTGCGATCACGGTCGCTGCTGCGACGTCCGCTTTGGAGTATCCAGGTGCTAGATCAGGCCTCCACGCCTCCACCAAATCTGGATTAGGGTTGAACTGGGTTATAGTCCGGGTGGGCTGTGGTTTAGGTAGGCCTTGTGGCTTGAGGTTGCCGCGGAGACGAGAGCTTGTTGATGCTCGATCGTCTTCAGTGGTTTCGGTTTCCGAACCTCGAGAAATACCCTTCCAGATGTC…	1296	5683	KR231958.1 Cucurbit aphid-borne yellows virus isolate NW18, complete genome
TRINITY_DN1185_c0_g1_i1	KR231962.1	86.193	1282	174	1	18	1296	5427	4146	0	1512	KR231962.1	1676	1105	1105	3	86.19	1	-1	CTCACCAGTTGTTAACATGGCGAGTTTTTCTGACTGTGCGCTAAGCTTCTTCAATGCTCCGCCAGTAAGAGAGGAAGTTGAGGAAAGAAATCCCCATTTCTTCCTGCTATCCATTACTTTTGCTTCTCTACGCTCGAGCATATCTCTTCCCTCGTGAATACTCCCTCCTGCGAGTACTGTTGCTGCGGCGACGTCCGCTTTGGAGTATCCAGGTGCTAGATCGGGCCTCCACGCCTCAATCAAATCAGGTTCGGGATTGAACTCAGTGATGGTTCGAGTAGGCTGTGGTCTTGGTAAGCCCTTTGGCTTGAGGTTGCCACGAAGACGAGAGCTTGTAGACGCTCGATCATCCTCAGTGGTCCCGGCTACAGAAGCACGGGAAATACCCTTCCATAAATC…	CTCGCCAGTTGTCAGCTTGGCGAGCTTTTCTGACTGTGCACTGAGTTTCTTTAAAGAGCCACTAGTGAGAGTGGAAGCTGAGGAGAGAACTCCCCATTTCTTCCTGCTATCCATCACTAACTCTTCTCTTCGCCTGAGCATATCTCGTCCCTCGTGGATACTCCCTCCTGCGATCACGGTCGCTGCTGCGACGTCCGCTTTGGAGTATCCAGGTGCTAGATCAGGCCTCCACGCCTCCACCAAATCTGGATTAGGGTTGAACTGGGTTATAGTCCGGGTGGGCTGTGGTTTGGGTAGGCCTTGTGGCTTGAGGTTGCCGCGGAGACGAGAGCTTGTTGATGCTCGATCGTCTTCAGTGGTTTCGGTTTCCGAACCTCGAGAAATACCCTTCCAGATGTC…	1296	5682	KR231962.1 Cucurbit aphid-borne yellows virus isolate SW25, complete genome
TRINITY_DN1185_c0_g1_i1	KR231959.1	85.923	1300	178	3	1	1296	5444	4146	0	1510	KR231959.1	1674	1117	1117	5	85.92	1	-1	CGTTGATATTGCACT-CACTCACCAGTTGTTAACATGGCGAGTTTTTCTGACTGTGCGCTAAGCTTCTTCAATGCTCCGCCAGTAAGAGAGGAAGTTGAGGAAAGAAATCCCCATTTCTTCCTGCTATCCATTACTTTTGCTTCTCTACGCTCGAGCATATCTCTTCCCTCGTGAATACTCCCTCCTGCGAGTACTGTTGCTGCGGCGACGTCCGCTTTGGAGTATCCAGGTGCTAGATCGGGCCTCCACGCCTCAATCAAATCAGGTTCGGGATTGAACTCAGTGATGGTTCGAGTAGGCTGTGGTCTTGGTAAGCCCTTTGGCTTGAGGTTGCCACGAAGACGAGAGCTTGTAGACGCTCGATCATCCTCAGTGGTCCCGGCTACAGAAGCACGGGA…	CGTTCATATT-CTCTACGCTCGCCAGTTGTCAACTTGGCGAGCTTTTCTGACTGTGCACTGAGTTTCTTTAAAGAGCCACTAGTGAGAGTGGAAGCTGAGGAGAGAACTCCCCATTTCTTCCTGCTATCCATCACTGACTCTCCTCTTCGCCTTAGCATGTCTCGTCCCTCGTGGATACTCCCTCCTGCGATCACGGTCGCTGCTGCGACGTCCGCTTTGGAGTATCCAGGTGCTAGATCAGGCCTCCACGCCTCCACCAAATCTGGATCAGGGTTGAACTGGGTTATAGTCCGGGTGGGCTGTGGTTTGGGTAGGCCTTGTGGCTTGAGGTTGCCGCGGAGACGAGAGCTTGTTGATGCTCGATCGTCTTCAGTGGTTTCGGTTTCCGAACCTCGAGA…	1296	5683	KR231959.1 Cucurbit aphid-borne yellows virus isolate SW1, complete genome
TRINITY_DN1185_c0_g1_i1	KR231961.1	85.923	1300	178	3	1	1296	5444	4146	0	1510	KR231961.1	1674	1117	1117	5	85.92	1	-1	CGTTGATATTGCACT-CACTCACCAGTTGTTAACATGGCGAGTTTTTCTGACTGTGCGCTAAGCTTCTTCAATGCTCCGCCAGTAAGAGAGGAAGTTGAGGAAAGAAATCCCCATTTCTTCCTGCTATCCATTACTTTTGCTTCTCTACGCTCGAGCATATCTCTTCCCTCGTGAATACTCCCTCCTGCGAGTACTGTTGCTGCGGCGACGTCCGCTTTGGAGTATCCAGGTGCTAGATCGGGCCTCCACGCCTCAATCAAATCAGGTTCGGGATTGAACTCAGTGATGGTTCGAGTAGGCTGTGGTCTTGGTAAGCCCTTTGGCTTGAGGTTGCCACGAAGACGAGAGCTTGTAGACGCTCGATCATCCTCAGTGGTCCCGGCTACAGAAGCACGGGA…	CGTTCATATT-CTCTACGCTCGCCAGTTGTCAACTTGGCGAGCTTTTCTGACTGTGCACTGAGTTTCTTTAAAGAGCCACTAGTGAGAGTGGAAGCTGAGGAGAGAACTCCCCATTTCTTCCTGCTATCCATCACTGACTCTCCTCTTCGCCTTAGCATGTCTCGTCCCTCGTGGATACTCCCTCCTGCGATCACGGTCGCTGCTGCGACGTCCGCTTTGGAGTATCCAGGTGCTAGATCAGGCCTCCACGCCTCCACCAAATCTGGATCAGGGTTGAACTGGGTTATAGTCCGGGTGGGCTGTGGTTTGGGTAGGCCTTGTGGCTTGAGGTTGCCGCGGAGACGAGAGCTTGTTGATGCTCGATCGTCTTCAGTGGTTTCGGTTTCCGAACCTCGAGA…	1296	5683	KR231961.1 Cucurbit aphid-borne yellows virus isolate SW2, complete genome
TRINITY_DN1185_c0_g1_i1	GQ221224.1	86.115	1282	175	1	18	1296	5427	4146	0	1508	GQ221224.1	1672	1104	1104	3	86.12	1	-1	CTCACCAGTTGTTAACATGGCGAGTTTTTCTGACTGTGCGCTAAGCTTCTTCAATGCTCCGCCAGTAAGAGAGGAAGTTGAGGAAAGAAATCCCCATTTCTTCCTGCTATCCATTACTTTTGCTTCTCTACGCTCGAGCATATCTCTTCCCTCGTGAATACTCCCTCCTGCGAGTACTGTTGCTGCGGCGACGTCCGCTTTGGAGTATCCAGGTGCTAGATCGGGCCTCCACGCCTCAATCAAATCAGGTTCGGGATTGAACTCAGTGATGGTTCGAGTAGGCTGTGGTCTTGGTAAGCCCTTTGGCTTGAGGTTGCCACGAAGACGAGAGCTTGTAGACGCTCGATCATCCTCAGTGGTCCCGGCTACAGAAGCACGGGAAATACCCTTCCATAAATC…	CTCGCCAGTTGTCAACTTGGCGAGCTTTTCTGACTGTGCACTAAGTTTCTTTAAAGAGCCACTAGTGAGAGTAGAAGCCGAGGAGAGAACTCCCCATTTCTTCCTGCTATCCATCACTGACTCTTCTCTTCGCCTGAGCATATCTCGTCCCTCGTGGATGCTCCCTCCTGCGATCACGGTCGCTGCTGCGACGTCCGCTTTGGAGTATCCAGGTGCTAGATCAGGCCTCCACGCCTCCACCAAATCTGGATTAGGGTTGAACTGGGTTATAGTCCGGGTGGGCTGTGGTTTAGGTAGGCCTTGTGGCTTGAGGTTACCGCGAAGACGAGAGCTTGTTGATGCTCGATCGTCTTCAGTGGTTTCGGTTTCCGAACCTCGAGAAATACCCTTCCAGATGTC…	1296	5682	GQ221224.1 Cucurbit aphid-borne yellows virus isolate CABYV-JAN, complete genome
TRINITY_DN1185_c0_g1_i1	KR231942.1	86.115	1282	175	1	18	1296	5427	4146	0	1508	KR231942.1	1672	1104	1104	3	86.12	1	-1	CTCACCAGTTGTTAACATGGCGAGTTTTTCTGACTGTGCGCTAAGCTTCTTCAATGCTCCGCCAGTAAGAGAGGAAGTTGAGGAAAGAAATCCCCATTTCTTCCTGCTATCCATTACTTTTGCTTCTCTACGCTCGAGCATATCTCTTCCCTCGTGAATACTCCCTCCTGCGAGTACTGTTGCTGCGGCGACGTCCGCTTTGGAGTATCCAGGTGCTAGATCGGGCCTCCACGCCTCAATCAAATCAGGTTCGGGATTGAACTCAGTGATGGTTCGAGTAGGCTGTGGTCTTGGTAAGCCCTTTGGCTTGAGGTTGCCACGAAGACGAGAGCTTGTAGACGCTCGATCATCCTCAGTGGTCCCGGCTACAGAAGCACGGGAAATACCCTTCCATAAATC…	CTCGCCAGTTGTCAACTTGGCGAGCTTTTCAGACTGTGCACTGAGTTTCTTTAAAGAGCCACTAGTGAGAGTGGAAGCTGAGGAGAGAACTCCCCATTTCTTCCTGCTATCCATCACTGACTCTTCTCTTCGCCTTAGCATATCTCGTCCCTCGTGGACACTCCCTCCTGCGATCACGGTCGCTGCTGCAACGTCCGCTTTGGAGTATCCAGGTGCTAGATCAGGCCTCCACGCCTCCACCAAATCTGGATCAGGGTTGAACTGGGTTATAGTCCGGGTGGGCTGTGGTTTGGGTAGGCCTTGTGGCTTGAGGTTGCCGCGGAGACGAGAGCTTGTTGATGCTCGATCGTCTTCAGTGGTTTCGGTTTCCGAACCTCGAGAAATACCCTTCCAGATGTC…	1296	5683	KR231942.1 Cucurbit aphid-borne yellows virus isolate CY3, complete genome
TRINITY_DN1185_c0_g1_i1	KR231963.1	86.115	1282	175	1	18	1296	5427	4146	0	1508	KR231963.1	1672	1104	1104	3	86.12	1	-1	CTCACCAGTTGTTAACATGGCGAGTTTTTCTGACTGTGCGCTAAGCTTCTTCAATGCTCCGCCAGTAAGAGAGGAAGTTGAGGAAAGAAATCCCCATTTCTTCCTGCTATCCATTACTTTTGCTTCTCTACGCTCGAGCATATCTCTTCCCTCGTGAATACTCCCTCCTGCGAGTACTGTTGCTGCGGCGACGTCCGCTTTGGAGTATCCAGGTGCTAGATCGGGCCTCCACGCCTCAATCAAATCAGGTTCGGGATTGAACTCAGTGATGGTTCGAGTAGGCTGTGGTCTTGGTAAGCCCTTTGGCTTGAGGTTGCCACGAAGACGAGAGCTTGTAGACGCTCGATCATCCTCAGTGGTCCCGGCTACAGAAGCACGGGAAATACCCTTCCATAAATC…	CTCGCCAGTTGTCAGCTTGGCGAGCTTTTCTGACTGTGCACTGAGTTTCTTTAAAGAGCCACTAGTGAGAGTGGAAGCTGAGGAGAGAACTCCCCATTTCTTCCTGCTATCCATCACTGACTCTTCTCTCCGCCTGAGCATATCTCGTCCCTCGTGGATACTCCCTCCTGCGATCACGGTCGCTGCTGCGACGTCCGCTTTGGAGTATCCAGGTGCTAGATCAGGCCTCCACGCCTCCACCAAATCTGGATTAGGGTTGAACTGGGTTATAGTCCGGGTGGGCTGTGGTTTGGGTAGGCCTTGTGGCTTGAGGTTGCCGCGGAGACGAGAGCTTGTTGATGCTCGATCGTCTTCAGTGGTTTCGGTTTCCGAACCTCGAGAAATACCCTTCCAGATGTC…	1296	5681	KR231963.1 Cucurbit aphid-borne yellows virus isolate SW64, complete genome
TRINITY_DN1185_c0_g1_i1	KR231945.1	86.037	1282	176	1	18	1296	5427	4146	0	1503	KR231945.1	1666	1103	1103	3	86.04	1	-1	CTCACCAGTTGTTAACATGGCGAGTTTTTCTGACTGTGCGCTAAGCTTCTTCAATGCTCCGCCAGTAAGAGAGGAAGTTGAGGAAAGAAATCCCCATTTCTTCCTGCTATCCATTACTTTTGCTTCTCTACGCTCGAGCATATCTCTTCCCTCGTGAATACTCCCTCCTGCGAGTACTGTTGCTGCGGCGACGTCCGCTTTGGAGTATCCAGGTGCTAGATCGGGCCTCCACGCCTCAATCAAATCAGGTTCGGGATTGAACTCAGTGATGGTTCGAGTAGGCTGTGGTCTTGGTAAGCCCTTTGGCTTGAGGTTGCCACGAAGACGAGAGCTTGTAGACGCTCGATCATCCTCAGTGGTCCCGGCTACAGAAGCACGGGAAATACCCTTCCATAAATC…	CTCGCCAGTTGTCAACTTGGCGAGCTTTTCTGACTGTGCACTGAGTTTCTTTAAAGAGCCACTAGTGAGAGTGGAAGCTGAGGAGAGAACTCCCCATTTCTTCCTGCTATCCATCACTGACTCTTCTCTTCGCCTTAACATATCTCGTCCCTCATGGATACTCCCTCCTGCGATCACGGTCGCTGCTGCGACGTCCGCTTTGGAGTATCCAGGTGCTAGATCAGGCCTCCACGCCTCCACTAAATCTGGATTAGGGTTGAACTGGGTTATAGTCCGGGTGGGCTGTGGTTTGGGTAGGCCTTGTGGCTTGAGGTTGCCGCGGAGACGAGAGCTTGTTGATGCTCGATCGTCTTCAGTGGTTTCGGTTTCCGAACCTCGAGAAATACCCTTCCAGATGTC…	1296	5683	KR231945.1 Cucurbit aphid-borne yellows virus isolate GM7, complete genome
TRINITY_DN1185_c0_g1_i1	KR231956.1	86.037	1282	176	1	18	1296	5427	4146	0	1503	KR231956.1	1666	1103	1103	3	86.04	1	-1	CTCACCAGTTGTTAACATGGCGAGTTTTTCTGACTGTGCGCTAAGCTTCTTCAATGCTCCGCCAGTAAGAGAGGAAGTTGAGGAAAGAAATCCCCATTTCTTCCTGCTATCCATTACTTTTGCTTCTCTACGCTCGAGCATATCTCTTCCCTCGTGAATACTCCCTCCTGCGAGTACTGTTGCTGCGGCGACGTCCGCTTTGGAGTATCCAGGTGCTAGATCGGGCCTCCACGCCTCAATCAAATCAGGTTCGGGATTGAACTCAGTGATGGTTCGAGTAGGCTGTGGTCTTGGTAAGCCCTTTGGCTTGAGGTTGCCACGAAGACGAGAGCTTGTAGACGCTCGATCATCCTCAGTGGTCCCGGCTACAGAAGCACGGGAAATACCCTTCCATAAATC…	CTCGCCAGTTGTCAACTTGGCGAGCTTTTCTGACTGTGCGCTGAGTTTCTTTAAAGAGCCACTAGTGAGAGTGGAAGCTGAGGAGAGAACTCCCCATTTCTTCCTGCTATCCATCACTGACTCTTCTCTTCGCCTGAGCATATCTCGTCCCTCGTGGATACTCCCTCCTGGGATCACGGTAGCTGCTGCGACGTCCGCTTTGGAGTATCCAGGTGCTAAATCAGGCCTCCACGCCTCCACCAAATCTGGATTAGGGTTGAACTGGGTTATAGTCCGGATGGGCTGTGGTTTGGGTAGGCCTTGTGGCTTGAGGTTGCCGCGGAGACGAGAGCTTGTTGATGCTCGATCGTCTTCAGTGGTTTCGGTTTCCGAACCTCGAGAAATACCCTTCCAGATGTC…	1296	5683	KR231956.1 Cucurbit aphid-borne yellows virus isolate NW2(14), complete genome
TRINITY_DN1185_c0_g1_i1	KR231957.1	85.881	1282	178	1	18	1296	5427	4146	0	1494	KR231957.1	1656	1101	1101	3	85.88	1	-1	CTCACCAGTTGTTAACATGGCGAGTTTTTCTGACTGTGCGCTAAGCTTCTTCAATGCTCCGCCAGTAAGAGAGGAAGTTGAGGAAAGAAATCCCCATTTCTTCCTGCTATCCATTACTTTTGCTTCTCTACGCTCGAGCATATCTCTTCCCTCGTGAATACTCCCTCCTGCGAGTACTGTTGCTGCGGCGACGTCCGCTTTGGAGTATCCAGGTGCTAGATCGGGCCTCCACGCCTCAATCAAATCAGGTTCGGGATTGAACTCAGTGATGGTTCGAGTAGGCTGTGGTCTTGGTAAGCCCTTTGGCTTGAGGTTGCCACGAAGACGAGAGCTTGTAGACGCTCGATCATCCTCAGTGGTCCCGGCTACAGAAGCACGGGAAATACCCTTCCATAAATC…	CTCGCCAGTTGTCAACTTGGCGAGCTTTTCTGACTGTGCACTGAGTTTCTTTAAAGAGCCACTAGTGAGAGTGGAAGCTGAGGAGGGAACTCCCCATTTCTTTCTGCTATCCATCACTGACTCTTCTCTTCGCCTGAGCATATCTCGTCCCTCGTGGATACTCCCTCCTGCGATCACGGTCGCTGCTGCGACGTCCGCTTTAGAGTATCCAGGTGCTAAATCAGGCCTCCACGCCTCCACCAAATCTGGATTAGGGTTGAACTGGGTTATAGTCCGGGTGGGCTGTGGTTTGGGTAGGCCTTGTGGCTTGAGGTTGCCGCGGAGACGAGAGCTTGTTGATGCTCGATCGTCTTCAGTGGTTTCGGTTTCCGAACCTCGAGAAATACCCTTCCAGATGTC…	1296	5683	KR231957.1 Cucurbit aphid-borne yellows virus isolate NW5, complete genome
TRINITY_DN1185_c0_g1_i1	JQ700306.1	84.784	1275	185	3	18	1289	5423	4155	0	1420	JQ700306.1	1574	1081	1081	9	84.78	1	-1	CTCACCAGTTGTTAACATGGCGAGTTTTTCTGACTGTGCGCTAAGCTTCTTCAATGCTCCGCCAGTAAGAGAGGAAGTTGAGGAAAGAAATCCCCATTTCTTCCTGCTATCCATTACTTTTGCTTCTCTACGCTCGAGCATATCTCTTCCCTCGTGAATACTCCCTCCTGCGAGTACTGTTGCTGCGGCGACGTCCGCTTTGGAGTATCCAGGTGCTAGATCGGGCCTCCACGCCTCAATCAAATCAGGTTCGGGATTGAACTCAGTGATGGTTCGAGTAGGCTGTGGTCTTGGTAAGCCCTTTGGCTTGAGGTTGCCACGAAGACGAGAGCTTGTAGACGCTCGATCATCCTCAGTGGTCCCGGCTACAGAAGCACGGGAAATACCCTTCCATAAATC…	CTCACCAGTTGTTAACTTGGCGAGCTTCTCTGACTGCGCGCTGAGCTTCTTTAAGGAACCGCTAGTGAGGGAAGAAGCTGAGGAAAGAATTCCCCATTTCTTCCTGCTTTCCATCACTTTCTCGTCCCTTCGTCTGAGCATATCTCGTCCCTCGTGGATACTCCCTCCAGCGATGACGGTCGCTGCTGCGACGTCCGCTTTGGAGTATTCGGGTGCTAGATCAGGCCTCCACGCTTCCACCAAATCTGGATCTGGATTAAACTTTGTTATCGTCCGGGTGGGTTGTGGCTGTGGTAAGCCTTTTGGCTTGAGATTGCCACGAAGACGAGAGCTGGTCGATGCTCGATCGCCTTCAGTGGTTGCTGCTGTAGATCCGAGAGGTATACCCGTCCAGTAATC…	1296	5679	JQ700306.1 Cucurbit aphid-borne yellows virus isolate CABYV-R-TW82, complete genome
TRINITY_DN1185_c0_g1_i1	KY617826.1	83.697	1282	206	1	18	1296	5417	4136	0	1368	KY617826.1	1516	1073	1073	3	83.7	1	-1	CTCACCAGTTGTTAACATGGCGAGTTTTTCTGACTGTGCGCTAAGCTTCTTCAATGCTCCGCCAGTAAGAGAGGAAGTTGAGGAAAGAAATCCCCATTTCTTCCTGCTATCCATTACTTTTGCTTCTCTACGCTCGAGCATATCTCTTCCCTCGTGAATACTCCCTCCTGCGAGTACTGTTGCTGCGGCGACGTCCGCTTTGGAGTATCCAGGTGCTAGATCGGGCCTCCACGCCTCAATCAAATCAGGTTCGGGATTGAACTCAGTGATGGTTCGAGTAGGCTGTGGTCTTGGTAAGCCCTTTGGCTTGAGGTTGCCACGAAGACGAGAGCTTGTAGACGCTCGATCATCCTCAGTGGTCCCGGCTACAGAAGCACGGGAAATACCCTTCCATAAATC…	CTCGCCAGATGTTAACTGAGCGAGTTTTTCCGACTGTGCGCTAAGTTTCTTTAGGGCTCCACTGGTGAGAGAGGAAGAAGAGGACAGAATTCCCCATTTCTTCCTACTATCCATCACCTTTTCTTCTCTTCGTTGAAGCATTTCACGCCCTTCATGGATACTCCCTCCAGCGATCACAGTCGCTGCTGCGACGTCCGCTTTGGAGTACCCTGGTGCTAAGTCAGGCCTCCACGCCTCCACCAGATCTGGTTTAGGTTTGAACTCAGTTATAGTTCGGGTGGGCTGTGGTTTTGGTAGGCCTCGTGGCTTGAGGTTGCCGCGAAGACGAGAACTCGTAGATGCTCGATCGTCTTCAGTGGTGCCAGCTGGTGATCCCAGGGCAATACCCTTCCAGAGATC…	1296	5677	KY617826.1 Cucurbit aphid-borne yellows virus, partial genome
TRINITY_DN1185_c0_g1_i1	JQ700305.1	81.24	1274	227	5	19	1289	5414	4150	0	1209	JQ700305.1	1340	1035	1035	12	81.24	1	-1	TCACCAGTTGTTAACATGGCGAGTTTTTCTGACTGTGCGCTAAGCTTCTTCAATGCTCCGCCAGTAAGAGAGGAAGTTGAGGAAAGAAATCCCCATTTCTTCCTGCTATCCATTACTTTTGCTTCTCTACGCTCGAGCATATCTCTTCCCTCGTGAATACTCCCTCCTGCGAGTACTGTTGCTGCGGCGACGTCCGCTTTGGAGTATCCAGGTGCTAGATCGGGCCTCCACGCCTCAATCAAATCAGGTTCGGGATTGAACTCAGTGATGGTTCGAGTAGGCTGTGGTCTTGGTAAGCCCTTTGGCTTGAGGTTGCCACGAAGACGAGAGCTTGTAGACGCTCGATCATCCTCAGTGGTCCCGGCTACAGAAGCACGGGAAATACCCTTCCATAAATCA…	TCGCCGGTCGTAAGCTTTGCGAGTTTCTCAGACTGGGCGCTCACCTTAAG-AGTGC--CGCCTGTTAAGGAGGAGACCGTTGAAAGCGGTCCCCATTTCTTTCTGCTATCCATGACGGCATCATCTCTTCTCTTAAGGTGTTCTCGTCCTTCATGTACGGAACCTCCGGCGATCACAGTCGCTGCTGCGACGTCCGCCTTGGAGTATGTCGGTGCTAGGTCGGGTCGCCACGCCTCAACCAAATCAGGGTTTGGCTTGAAATCGGTTATAGTGCGAGTAGGCTGTGGCTTAGGTAAACCCGGTGGCTTGAGGTTACCACGAAGACGAGAGCTCGTGGAAGCTCGATCGCCTTCAGTGGTTGCTGCTGTAGATCCCAGAGGTATACCTTTCCAAAAATCT…	1296	5670	JQ700305.1 Cucurbit aphid-borne yellows virus isolate CABYV-C-TW20, complete genome
TRINITY_DN1185_c0_g1_i1	KP326573.1	80.88	659	126	0	580	1238	5001	4343	6.92e-177	621	KP326573.1	688	533	533	0	80.88	1	-1	GACCACGTCATTGCCCCCTTGCGTGGTATTCTTCTTGGCTCGTTCCCATTATTATCTTCGTCGATTGATACCGAGATTGCCCCCCACTCGCAATATTTCTCCGTGTAATTCCCGTATGAAACGGTGTAATTATATGAAGAATCCTTCTGTATAGGGGGGGGGTATATAGCCCAGCTTCCTTCCTCATCATCACATTCTAATTCGAAGGAAGCGGACCAATCGACTTCAACGGCCCGCGCAGTGTCAAAACTTTTACCATTCATTGTTGCGTCGGGATGTCCTGCCACAAAAGCTGTGTTAGATTGGTAATTTGTGATTTTACAGCCTTTGTAATTTCCTATATTCCAACCTCTTTGAGAAACATCGTAAGCGATATTTCCAAGCCAACTACCATCCAGT…	GACCACGCCATTTCCCCCTTGCGCGGTATTCTTCTTGCTGCATACCCCTCATTATCTTCATCAATAGAAACAGAAATGGCTCCCCACTCACAATACTTCTCCGTATAATTTCCGTAGGACACGGTGTAATTATAAGAGGCATCTTTCTGGATCGGGGGGGGATAAATCATCCAGCTTCCTTCTTCATCATCACATTCAAGTTCAAAGGAAGCGAACCAATCAACTTCTACTGCCCGGGCATTGTCGAAAGTTTTACCATTCATCTTTGCATCCGGGTGCCCCGCTACAAAAGTTGTGTTGGTTTGAAAATTTTTAATCTTGCAACCTTTGTAATTCCCCACTGTCCAACCGCGTTGAGAGACATCATAGGCAATGTTGCCAAGCCAACTACCATCCAAA…	1296	6244	KP326573.1 Pepper vein yellows virus isolate HN, complete genome
TRINITY_DN1185_c0_g1_i1	KP300822.1	80.121	659	131	0	580	1238	5001	4343	7.9e-170	598	KP300822.1	662	528	528	0	80.12	1	-1	GACCACGTCATTGCCCCCTTGCGTGGTATTCTTCTTGGCTCGTTCCCATTATTATCTTCGTCGATTGATACCGAGATTGCCCCCCACTCGCAATATTTCTCCGTGTAATTCCCGTATGAAACGGTGTAATTATATGAAGAATCCTTCTGTATAGGGGGGGGGTATATAGCCCAGCTTCCTTCCTCATCATCACATTCTAATTCGAAGGAAGCGGACCAATCGACTTCAACGGCCCGCGCAGTGTCAAAACTTTTACCATTCATTGTTGCGTCGGGATGTCCTGCCACAAAAGCTGTGTTAGATTGGTAATTTGTGATTTTACAGCCTTTGTAATTTCCTATATTCCAACCTCTTTGAGAAACATCGTAAGCGATATTTCCAAGCCAACTACCATCCAGT…	GACCACACCATTTACACCTTGCGCGGTATTCTTCTTGCTGCATACCCCTCATTATCTTCATCAATAGAAACAGAAATGGCTCCCCACTCACAATACTTCTCTGTATAATTTCCGTAGGACACGGTGTAATTATAAGAGGCATCTTTTTGGATCGGGGGGGGATAAATCATCCAGCTTCCTTCTTCGTCATCACATTCTAGTTCGAAGGAAGCGAACCAATCTACTTCTACTGCCCGGGCATTGTCGAAAGTTTTACCATTCATCTTTGCATCCGGGTGCCCCGCTACAAAAGTTGTGTTGGTTTGAAAATTTTTAATCTTGCAACCTTTGTAATTCCCCACTGTCCAACCGCGTTGAGAGACATCATAGGCAATGTTGCCAAGCCAACTACCATCCAAA…	1296	6244	KP300822.1 UNVERIFIED: Pepper vein yellows virus isolate HN genomic sequence
TRINITY_DN1185_c0_g1_i1	NC_015050.1	79.638	663	135	0	579	1241	5002	4340	1.43e-166	587	NC_015050.1	650	528	528	0	79.64	1	-1	AGACCACGTCATTGCCCCCTTGCGTGGTATTCTTCTTGGCTCGTTCCCATTATTATCTTCGTCGATTGATACCGAGATTGCCCCCCACTCGCAATATTTCTCCGTGTAATTCCCGTATGAAACGGTGTAATTATATGAAGAATCCTTCTGTATAGGGGGGGGGTATATAGCCCAGCTTCCTTCCTCATCATCACATTCTAATTCGAAGGAAGCGGACCAATCGACTTCAACGGCCCGCGCAGTGTCAAAACTTTTACCATTCATTGTTGCGTCGGGATGTCCTGCCACAAAAGCTGTGTTAGATTGGTAATTTGTGATTTTACAGCCTTTGTAATTTCCTATATTCCAACCTCTTTGAGAAACATCGTAAGCGATATTTCCAAGCCAACTACCATCCAG…	AGACCACGCCATTTCCCCCTTGCGCGGAATTCTTCTTGGTGCGTACCCCTCGTTGTCTTCGTCTATAGAGACGGATATGGCTCCCCATTCACAATACTTCTCCGTATAATTCCCGTATGACACGGTGTAGTTATAGGAGGAATCCTTCTGGATCGGCGGGGGATAAATCATCCAGCTTCCTTCTTCATCATCACACTCAAGTTCAAAGGAAGCGAACCAATCAACTTCAACTGCCCGGGCGCTGTCAAAAGCTTTGCCATTCATTTTAGCCTCCGGGTGCCCCGCTACAAAGGTGATATTCGTCTGATAATTCTTTATTTTACACCCTTTGTAATTTCCCACAGTCCAGCCTCTTTGCGAGACATCATAGGCAATATTGCCGAGCCAACTACCATCGAG…	1296	6244	NC_015050.1 Pepper vein yellows virus genomic RNA, complete genome
TRINITY_DN1185_c0_g1_i1	KU999109.1	79.638	663	135	0	579	1241	5001	4339	1.43e-166	587	KU999109.1	650	528	528	0	79.64	1	-1	AGACCACGTCATTGCCCCCTTGCGTGGTATTCTTCTTGGCTCGTTCCCATTATTATCTTCGTCGATTGATACCGAGATTGCCCCCCACTCGCAATATTTCTCCGTGTAATTCCCGTATGAAACGGTGTAATTATATGAAGAATCCTTCTGTATAGGGGGGGGGTATATAGCCCAGCTTCCTTCCTCATCATCACATTCTAATTCGAAGGAAGCGGACCAATCGACTTCAACGGCCCGCGCAGTGTCAAAACTTTTACCATTCATTGTTGCGTCGGGATGTCCTGCCACAAAAGCTGTGTTAGATTGGTAATTTGTGATTTTACAGCCTTTGTAATTTCCTATATTCCAACCTCTTTGAGAAACATCGTAAGCGATATTTCCAAGCCAACTACCATCCAG…	AGACCACGCCATTTCCCCCTTGCGCGGAATTCTTCTTGGTGCGTACCCCTCGTTGTCTTCGTCTATAGAGACGGATATGGCTCCCCATTCACAATACTTCTCCGTATAATTCCCGTATGACACGGTGTAGTTATAGGAGGAATCCTTCTGGATCGGCGGGGGATAAATCATCCAGCTTCCTTCTTCATCATCACACTCAAGTTCAAAGGAAGCGAACCAATCAACTTCAACTGCCCGGGCGCTGTCAAAAGCTTTGCCATTCATTTTAGCCTCCGGGTGCCCCGCTACAAAGGTGATATTCGTCTGATAATTCTTTATTTTACACCCTTTGTAATTTCCCACAGTCCAGCCTCTTTGCGAGACATCATAGGCAATATTGCCGAGCCAACTACCATCGAG…	1296	6244	KU999109.1 Pepper vein yellows virus isolate 12KNX1, complete genome
TRINITY_DN1185_c0_g1_i1	KF359946.1	77.027	666	148	3	580	1241	4973	4309	4.67e-141	502	KF359946.1	556	513	513	5	77.03	1	-1	GACCACGTCATTGCCCCCTTGCGTGGTATTCTTCTTGGCTCGTTCCCATT---ATTATCTTCGTCGATTGATACCGAGATTGCCCCCCACTCGCAATATTTCTCCGTGTAATTCCCGTATGAAACGGTGTAATTATATGAAGAATCCTTCTGTATAGGGGGGGGGTATATA-GCCCAGCTTCCTTCCTCATCATCACATTCTAATTCGAAGGAAGCGGACCAATCGACTTCAACGGCCCGCGCAGTGTCAAAACTTTTACCATTCATTGTTGCGTCGGGATGTCCTGCCACAAAAGCTGTGTTAGATTGGTAATTTGTGATTTTACAGCCTTTGTAATTTCCTATATTCCAACCTCTTTGAGAAACATCGTAAGCGATATTTCCAAGCCAACTACCATC…	GACCACATCATTGCCCCCTTATGTGGTTTAATTCTTGATTTGGTCCCTGTGGAATTGTCTTCATCTATAGAGACCGAGACAGCTCCCCACTCGCAATATTTCTCAGTATACTCACCGTAGGATACAGTGTAGTTATATGAGCTATCTTTTTGTATGGGGGGAGGGTAGATTCGCCAAGCT-CCATCTTCATCGTCACATGTAAGCTCAAAAGAGGCGAACCAATCCACTTCCACTGCGCGTGCAGCATCAAAGTGCTTGCCATTCATTTCCGCGTCCGGGTGTCCAGCCACAAAAACCGTGTTTGACTGGTAGTTGCTAATTTTGCAACCTTTATAGTCTCCAATATTCCAACCTCTTTGGGAAACGTCATAAGCGATATTGCCCAGCCAGTTACCATC…	1296	5866	KF359946.1 Cotton leafroll dwarf virus isolate M3 atypical, complete genome
TRINITY_DN1185_c0_g1_i1	KX588248.1	77.074	663	147	3	580	1238	4969	4308	4.67e-141	502	KX588248.1	556	511	511	5	77.07	1	-1	GACCACGTCATTGCCCCCTTGCGTGGTATTCTTCTTGGCTCGTTCCCATT---ATTATCTTCGTCGATTGATACCGAGATTGCCCCCCACTCGCAATATTTCTCCGTGTAATTCCCGTATGAAACGGTGTAATTATATGAAGAATCCTTCTGTATAGGGGGGGGGTATATA-GCCCAGCTTCCTTCCTCATCATCACATTCTAATTCGAAGGAAGCGGACCAATCGACTTCAACGGCCCGCGCAGTGTCAAAACTTTTACCATTCATTGTTGCGTCGGGATGTCCTGCCACAAAAGCTGTGTTAGATTGGTAATTTGTGATTTTACAGCCTTTGTAATTTCCTATATTCCAACCTCTTTGAGAAACATCGTAAGCGATATTTCCAAGCCAACTACCATC…	GACCACACCATTGCCCCCTTGTGTGGTTTGATTCGTGATTTGGTCCCTGTGGAATTGTCTTCGTCTATAGAGACCGAGACAGCTCCCCACTCGCAATATTTCTCAGTATAATCACCGTATGATACAGTATAATTATACGAGCTGTCTTTTTGTATGGGGGGAGGGTAGATTCGCCAAGCT-CCATCTTCATCATCACATGTAAGCTCGAAAGAGGCGAACCAATCCACTTCCACTGCACGCGCAGCATCAAAGTGCTTGCCATTCATCTCTGCGTCCGGGTGACCAGCCACAAAAACAGTGTTGGACTGGTAGTTGCTGATTTTGCAACCTTTATAATCTCCTATGTTCCAACCTCTTTGGGATACGTCGTAAGCAATATTGCCCAACCAGTTACCATC…	1296	5841	KX588248.1 Cotton leafroll dwarf virus isolate CN-S5, partial genome
TRINITY_DN1185_c0_g1_i1	KX588248.1	73.256	86	23	0	187	272	5476	5391	2.44e-05	51.8	KX588248.1	56	63	63	0	73.26	1	-1	GCGAGTACTGTTGCTGCGGCGACGTCCGCTTTGGAGTATCCAGGTGCTAGATCGGGCCTCCACGCCTCAATCAAATCAGGTTCGGG	GCGAGAATAGTTGCAGCAGCAACATCCTCCTTAGAGTATCCAGGACCTGTCCCTGGCTTCCAAGCCTCAACTAAATCTGGTTCCGG	1296	5841	KX588248.1 Cotton leafroll dwarf virus isolate CN-S5, partial genome
TRINITY_DN1185_c0_g1_i1	NC_014545.1	76.877	666	149	3	580	1241	4972	4308	5.69e-140	499	NC_014545.1	552	512	512	5	76.88	1	-1	GACCACGTCATTGCCCCCTTGCGTGGTATTCTTCTTGGCTCGTTCCCATT---ATTATCTTCGTCGATTGATACCGAGATTGCCCCCCACTCGCAATATTTCTCCGTGTAATTCCCGTATGAAACGGTGTAATTATATGAAGAATCCTTCTGTATAGGGGGGGGGTATATA-GCCCAGCTTCCTTCCTCATCATCACATTCTAATTCGAAGGAAGCGGACCAATCGACTTCAACGGCCCGCGCAGTGTCAAAACTTTTACCATTCATTGTTGCGTCGGGATGTCCTGCCACAAAAGCTGTGTTAGATTGGTAATTTGTGATTTTACAGCCTTTGTAATTTCCTATATTCCAACCTCTTTGAGAAACATCGTAAGCGATATTTCCAAGCCAACTACCATC…	GACCACATCATTACCCCCTTATGTGGTTTAATTCTTGATTTGGTCCCTGTGGAATTGTCTTCGTCTACAGAGACCGAGACAGCTCCCCACTCGCAATATTTCTCAGTATAATCGCCGTAGGATACAGTGTAATTATACGAGCTATCTTTTTGTATGGGGGGAGGGTAGATTCGCCAAGCT-CCATCTTCATCATCACATGTAAGCTCAAAAGAGGCAAACCAATCCACTTCCACTGCGCGTGCAGCATCAAAGTGCTTGCCATCCATTTCCGCGTCCGGGTGTCCAGCCACAAAAACCGCGTTTGACTGGTAGTTGCTAATTCTGCAACCTTTGTAATCTCCAATATTCCAACCTCTCTGGGAAACGTCATAAGCGATATTGCCCAGCCAGTTACCATC…	1296	5866	NC_014545.1 Cotton leafroll dwarf virus, complete genome
TRINITY_DN1185_c0_g1_i1	HQ827780.2	76.969	673	147	6	575	1241	4978	4308	6.93e-139	495	HQ827780.2	548	518	518	8	76.97	1	-1	GGGTA-GACCACGTCATTGCCCCCTTGCGTGGTATTCTTCTTGGCTCGTTCCCATT---ATTATCTTCGTCGATTGATACCGAGATTGCCCCCCACTCGCAATATTTCTCCGTGTAATTCCCGTATGAAACGGTGTAATTATATGAAGAATCCTTCTGTATAGGGGGGGGGTATATA-GCCCAGCTTCCTTCCTCATCATCACATTCTAATTCGAAGGAAGCGGACCAATCGACTTCAACGGCCCGCGCAGTGTCAAAACTTTTACCATTCATTGTTGCGTCGGGATGTCCTGCCACAAAAGCTGTGTTAGATTGGTAATTTGTGATTTTACAGCCTTTGTAATTTCCTATATTCCAACCTCTTTGAGAAACATCGTAAGCGATATTTCCAAGCCAACT…	GGGTATGACCACATCATTACCCCCTTATGTGGTTTAATTCTTGATTTGGTCCCTGTGGAATTGTCTTCGTCTATAGAGACCGAGACAGCTCCCCACTCGCAATATTTCTCAGTATAATCGCCGTAGGATACAGTGTAATTATACGAGCTATCTTTTTGTATGGGGGGAGGGTAGATTCGCCAAGCT-CCATCTTCATCATCACATGTAAGCTCAAAAGAGGCAAACCAATCCACTTCCACTGCGCGTGCAGCATCAAAGTGCTTGCCATTCATTTCCGCGTCCGGGTGTCCAGCCACAAAAACCGTGTTTGACTGGTAGTTGCTAATCCTGCAACCTTTATAGTCTCCAATATTCCAACCTCTCTGGGAAACGTCATAAGCGATATTGCCCAGCCAGTT…	1296	5865	HQ827780.2 Cotton leafroll dwarf virus, complete genome
TRINITY_DN1185_c0_g1_i1	KF906261.1	76.727	666	150	3	580	1241	4972	4308	2.42e-138	493	KF906261.1	546	511	511	5	76.73	1	-1	GACCACGTCATTGCCCCCTTGCGTGGTATTCTTCTTGGCTCGTTCCCATT---ATTATCTTCGTCGATTGATACCGAGATTGCCCCCCACTCGCAATATTTCTCCGTGTAATTCCCGTATGAAACGGTGTAATTATATGAAGAATCCTTCTGTATAGGGGGGGGGTATATA-GCCCAGCTTCCTTCCTCATCATCACATTCTAATTCGAAGGAAGCGGACCAATCGACTTCAACGGCCCGCGCAGTGTCAAAACTTTTACCATTCATTGTTGCGTCGGGATGTCCTGCCACAAAAGCTGTGTTAGATTGGTAATTTGTGATTTTACAGCCTTTGTAATTTCCTATATTCCAACCTCTTTGAGAAACATCGTAAGCGATATTTCCAAGCCAACTACCATC…	GACCACATCATTGCCCCCTTATGTGGTTTAATTCTTGATTTGGTCCCTGTGGAATTGTCTTCGTCTATAGAGACTGAGACAGCTCCCCACTCGCAATATTTCTCAGTATACTCACCGTAGGATACAGTGTAGTTATACGAGCTATCTTTTTGTATGGGGGGAGGGTAGATTCGCCAAGCT-CCATCTTCATCATCACATGTAAGCTCGAAAGAGGCAAACCAATCTACTTCCACTGCGCGTGCAGCATCAAAGTGCTTGCCATTCATTTCCGCGTCCGGGTGTCCAGCCACAAAAACCGTGTTTGACTGGTAGTTGCTAATCCTGCAACCTTTATAGTCTCCAATATTCCAACCTCTTTGGGAAACGTCATAAGCGATATTGCCCAGCCAGTTACCATC…	1296	5865	KF906261.1 Cotton atypical red leaf virus isolate DeltaOpal, complete genome
TRINITY_DN1185_c0_g1_i1	NC_018571.2	76.065	681	157	2	567	1241	5009	4329	2.95e-137	489	NC_018571.2	542	518	518	6	76.06	1	-1	TGGTTCAGGGGTAGACCACGTCATTGCCCCCTTGCGTGGTATTCTTCT---TGGCTCGTTCCCATTA---TTATCTTCGTCGATTGATACCGAGATTGCCCCCCACTCGCAATATTTCTCCGTGTAATTCCCGTATGAAACGGTGTAATTATATGAAGAATCCTTCTGTATAGGGGGGGGGTATATAGCCCAGCTTCCTTCCTCATCATCACATTCTAATTCGAAGGAAGCGGACCAATCGACTTCAACGGCCCGCGCAGTGTCAAAACTTTTACCATTCATTGTTGCGTCGGGATGTCCTGCCACAAAAGCTGTGTTAGATTGGTAATTTGTGATTTTACAGCCTTTGTAATTTCCTATATTCCAACCTCTTTGAGAAACATCGTAAGCGATATTTCC…	TGGCTCGGGCATTGACCACGTCATAACCCCCTTACGTGGCTTTATACTCTGTGGTGCCCTCCCTGTAGGGTTGTCCTCATCGATGGAAATTGAAACAGCTCCCCATTCGCAGTATTTATCAGTATAATTACCGTATGAAACGGTGTAATTATACGAACTGTCTTTTTGGATGGGGGGGGGATAAATCCGCCAGCTGCCTCCATCATCATCACATTCTAATTCAAATGAGGCATACCAATCTACTTCCACTGCCCGCGCTTTGTCAAATTGTTTGCCATTCATAGTCGCGTCGGGGTGGCCAGCAACAAAGGATGTGTTTGATTGATAATTCTTGATATTGCATCCTTTGTGATTACCAACATTCCAACCTCGCTGGGACACATCATAAGCTATATTTCC…	1296	5843	NC_018571.2 Suakwa aphid-borne yellows virus isolate SABYV-TW19, complete genome
TRINITY_DN1185_c0_g1_i1	KF906260.1	76.426	666	152	3	580	1241	4972	4308	1.25e-135	484	KF906260.1	536	509	509	5	76.43	1	-1	GACCACGTCATTGCCCCCTTGCGTGGTATTCTTCTTGGCTCGTTCCCATT---ATTATCTTCGTCGATTGATACCGAGATTGCCCCCCACTCGCAATATTTCTCCGTGTAATTCCCGTATGAAACGGTGTAATTATATGAAGAATCCTTCTGTATAGGGGGGGGGTATATA-GCCCAGCTTCCTTCCTCATCATCACATTCTAATTCGAAGGAAGCGGACCAATCGACTTCAACGGCCCGCGCAGTGTCAAAACTTTTACCATTCATTGTTGCGTCGGGATGTCCTGCCACAAAAGCTGTGTTAGATTGGTAATTTGTGATTTTACAGCCTTTGTAATTTCCTATATTCCAACCTCTTTGAGAAACATCGTAAGCGATATTTCCAAGCCAACTACCATC…	GACCACATCATTGCCCCCTTATGTGGTTTAATTCTTGATTTGGTCCCTGTGGAATTGTCTTCGTCTATAGAGACTGAGACAGCTCCCCACTCGCAATATTTCTCAGTATACTCACCGTAGGATACAGTGTAGTTATACGAGCTATCTTTTTGTATGGGGGGAGGGTAGATTCGCCAAGCT-CCATCTTCATCATCACATGTAAGCTCAAAAGAGGCAAACCAATCTACTTCCACTGCGCGTGCAGCATCAAAGTGCTTGCCATTCATTTCCGCGTCCGGGTGTCCAGCCACAAAAACCGTGTTTGACTGGTAGTTGCTAATCCTGCAACCTTTATAGTCTCCAATGTTCCAACCTCTTTGGGAAACGTCATAAGCGATATTGCCCAGCCAGTTACCATC…	1296	5865	KF906260.1 Cotton atypical red leaf virus isolate IAC25RMD, complete genome
TRINITY_DN1185_c0_g1_i1	KF359947.1	76.426	666	152	3	580	1241	4973	4309	1.25e-135	484	KF359947.1	536	509	509	5	76.43	1	-1	GACCACGTCATTGCCCCCTTGCGTGGTATTCTTCTTGGCTCGTTCCCATT---ATTATCTTCGTCGATTGATACCGAGATTGCCCCCCACTCGCAATATTTCTCCGTGTAATTCCCGTATGAAACGGTGTAATTATATGAAGAATCCTTCTGTATAGGGGGGGGGTATATA-GCCCAGCTTCCTTCCTCATCATCACATTCTAATTCGAAGGAAGCGGACCAATCGACTTCAACGGCCCGCGCAGTGTCAAAACTTTTACCATTCATTGTTGCGTCGGGATGTCCTGCCACAAAAGCTGTGTTAGATTGGTAATTTGTGATTTTACAGCCTTTGTAATTTCCTATATTCCAACCTCTTTGAGAAACATCGTAAGCGATATTTCCAAGCCAACTACCATC…	GACCACATCATTGCCCCCTTATGTGGTTTAATTCTTGATTTGGTCCCTGTGGAATTGTCTTCATCTATAGAGACCGAGACAGCTCCCCACTCGCAATATTTCTCAGTATACTCACCGTAGGATACAGTGTAGTTATACGAGCTATCTTTTTGTATGGGGGGAGGGTAGATTCGCCAAGCT-CCATCTTCATCGTCACATGTAAGCTCAAAAGAGGCGAACCAATCCACTTCCACTGCGCGTGCAGCATCAAAGTGCTTGCCATTCATTTCCGCGTCCGGGTGTCCAGCCACAAAGACCGTGTTTGACTGGTAGTTGCTAATTTTGCAACCTTTATAGTCTCCAATATTCCAACCTCTTTGGGAAACGTCATAAGCGATATTGCCCAGCCAGTTACCATC…	1296	5866	KF359947.1 Cotton leafroll dwarf virus isolate M5 atypical, complete genome
TRINITY_DN1185_c0_g1_i1	KX122023.1	75.934	669	155	2	579	1241	4998	4330	1.86e-133	477	KX122023.1	528	508	508	6	75.93	1	-1	AGACCACGTCATTGCCCCCTTGCGTGGTATTCTTCT---TGGCTCGTTCCCATTA---TTATCTTCGTCGATTGATACCGAGATTGCCCCCCACTCGCAATATTTCTCCGTGTAATTCCCGTATGAAACGGTGTAATTATATGAAGAATCCTTCTGTATAGGGGGGGGGTATATAGCCCAGCTTCCTTCCTCATCATCACATTCTAATTCGAAGGAAGCGGACCAATCGACTTCAACGGCCCGCGCAGTGTCAAAACTTTTACCATTCATTGTTGCGTCGGGATGTCCTGCCACAAAAGCTGTGTTAGATTGGTAATTTGTGATTTTACAGCCTTTGTAATTTCCTATATTCCAACCTCTTTGAGAAACATCGTAAGCGATATTTCCAAGCCAACTACC…	AGACCACGTCATAACCCCCTTACGTGGTTTAATACTCTGTGGTGCCCTCCCTGTAGGGTTGTCCTCGTCAATGGAAATGGAAACAGCTCCCCACTCGCAGTATTTATCTGTATAATTTCCGTACGAAACGGTGTAATTATACGAACTGTCTTTTTGAATGGGGGGGGGATAAATCCGCCAGCTGCCTCCATCTTCATTACATTCTAATTCAAAAGAGGCATACCAATCTACTTCCACAGCCCGTGCTTTGTCAAATTGTTTTCCATTCATAGTAGCATCGGGGTGGCCAGCAACAAAGGTCGTGTTTGTTTGGTAGTTCTTAATATTACAACCTTTGTGATTTCCAACATTCCATCCTCGCTGGGACACGTCATAAGCTATATTTCCAAGCCAGCTGCC…	1296	5845	KX122023.1 Suakwa aphid-borne yellows virus isolate DL76, complete genome
TRINITY_DN1185_c0_g1_i1	JQ700307.1	75.588	680	160	2	568	1241	4882	4203	6.49e-133	475	JQ700307.1	526	514	514	6	75.59	1	-1	GGTTCAGGGGTAGACCACGTCATTGCCCCCTTGCGTGGT---ATTCTTCTTGGCTCGTTCCCATTA---TTATCTTCGTCGATTGATACCGAGATTGCCCCCCACTCGCAATATTTCTCCGTGTAATTCCCGTATGAAACGGTGTAATTATATGAAGAATCCTTCTGTATAGGGGGGGGGTATATAGCCCAGCTTCCTTCCTCATCATCACATTCTAATTCGAAGGAAGCGGACCAATCGACTTCAACGGCCCGCGCAGTGTCAAAACTTTTACCATTCATTGTTGCGTCGGGATGTCCTGCCACAAAAGCTGTGTTAGATTGGTAATTTGTGATTTTACAGCCTTTGTAATTTCCTATATTCCAACCTCTTTGAGAAACATCGTAAGCGATATTTCCA…	GGCTCGGGCGTTGACCACGTCATTACCCCCTTACGTGGTTTAATTCTTTGTGGCACCCTCCCTGTGGCGTTGTCCTCATCAATAGAGATGGAAACGGCTCCCCATTCACAGTATTTCTCTGTGTAGTTTCCGTACGAGACAGTGTAATTATACGAACTGTCCTTCTGTATGGGGGGAGGATAGATCCTCCAACTGCCTTCGTCATCATCACATTCTAGTTCAAATGAGGCGAACCAATCAACTTCCACTGCCCTAGCCGCATCAAAGTTCTTTCCATTCATGGATGCGTCAGGGTGTCCAGCTACAAAGGTCGTTTTCGACTGATAGTTCTTTATGCTGCAACCTTTGTAATTCCCAATATTCCAACCTCGCTGGGATACATCATACGCGATGTTTCCA…	1296	5676	JQ700307.1 Melon aphid-borne yellows virus isolate MABYV-TW1, complete genome
TRINITY_DN1185_c0_g1_i1	NC_010809.1	75.294	680	162	3	568	1241	4879	4200	1.43e-128	461	NC_010809.1	510	512	512	6	75.29	1	-1	GGTTCAGGGGTAGACCACGTCATTGCCCCCTTGCGTGGTAT--TCTTCT-TGGCTCGTTCCCATTA---TTATCTTCGTCGATTGATACCGAGATTGCCCCCCACTCGCAATATTTCTCCGTGTAATTCCCGTATGAAACGGTGTAATTATATGAAGAATCCTTCTGTATAGGGGGGGGGTATATAGCCCAGCTTCCTTCCTCATCATCACATTCTAATTCGAAGGAAGCGGACCAATCGACTTCAACGGCCCGCGCAGTGTCAAAACTTTTACCATTCATTGTTGCGTCGGGATGTCCTGCCACAAAAGCTGTGTTAGATTGGTAATTTGTGATTTTACAGCCTTTGTAATTTCCTATATTCCAACCTCTTTGAGAAACATCGTAAGCGATATTTCCA…	GGCTCGGGCGTTGACCACGTCATTACCCCCTTACGTGGTTTAATTTTCTGTGGCACCCTCCCTGTGGCGTTGTCCTCATCAATAGAGATGGAAACGGCTCCCCATTCACAGTATTTTTCTGTGTAGTTTCCGTACGAGACAGTGTAATTATATGAACTGTCCTTCTGTATGGGGGGAGGATAAATCCTCCAACTGCCTTCGTCATCATCACATTCTAGTTCAAATGAGGCGAACCAATCAACTTCCACTGCCCTGGCTGCATCAAAGTTCTTTCCATTCATGGATGCGTCAGGGTGTCCAGCTACAAAGGTCGTTTTCGATTGATAGTTCTTTATGCTGCAACCTTTGTAATTCCCAATATTCCAACCGCGCTGGGATACATCATACGCGATGTTTCCA…	1296	5674	NC_010809.1 Melon aphid-borne yellows virus, complete genome
TRINITY_DN1185_c0_g1_i1	NC_029691.1	72.194	784	199	8	522	1291	5258	4480	6.5e-114	412	NC_029691.1	456	566	566	19	72.19	1	-1	AGGAGTGTTAAAGTCTTGTCTTTGACTATTATCCCCTGAAAAAGATGGTTCAGGG--------GTAGACCACGTCATTGCCCCCTTGCGTGGTATTCTTCTTGGCTCGTTCCCATTA---TTATCTTCGTCGATTGATACCGAGATTGCCCCCCACTCGCAATATTTCTCCGTGTAATTCCCGTATGAAACGGTGTAATTATATGAAGAATCCTTCTGTATAGGGGGGGGGTATATAGCCCAGCTTCCTTCCTCATCATCACATTCTAATTCGAAGGAAGCGGACCAATCGACTTCAACGGCCCGCGCAGTGTCAAAACTTTTACCATTCATTGTTGCGTCGGGATGTCCTGCCACAAAAGCTGTGTTA-GATTGGTAATTTGTGATTTTACAGCCTTT…	AGGAGTGTTATAGTCTGGTCTTTGACTCAAATCCTCTGGCA--GATCGTTCAGGGCCAGAGGTGTAGCCGGCGTCATTGCCCCCTTACGCGGCTTGAATTTTGGTGCCTTCCCTTTAGGGTTTTCCTCGTCAATTGAGATTGAGACAGTTCCCCACTCACAATACTTTTCAGTGTAATTTCCATAGGAGACAGTGTAATTATACGAACTGTCCTTTTGGATGGGTGGGGGATAGATTCTCCAACTGCCTTCATCATCATCACATTCCATTTCAAACGAGGCAAACCAATCAACTTGTATGACCCGATTGCTATCGAATTGTTTTGCATTCATTCTAGCATCGGGGTGTCCAGGTACATAGG-TGAGTTGTGCTTGGTAATTTGAGATTTTGCAACCTTT…	1296	6017	NC_029691.1 Ixeridium yellow mottle virus 1 isolate Bonghwa, complete genome
TRINITY_DN1185_c0_g1_i1	HM804471.1	67.582	1311	356	34	18	1296	5448	4175	1.26e-97	358	HM804471.1	396	886	886	69	67.58	1	-1	CTCACCAGTTGTTAACATGGCGAGTTTTTCTGACTGTGCGCT-AAGCTTCTTCAATGCTCCGCCAGTAAGAGAGGAAGTTGAGGAAAGAAATCCCCATTTCTTCCTGCTATCCATTACTTTTGCTTCTCTACGCTCGAGCATATCTCTTCCCTCGTGAATACTCCCTCCTGCGAGTACTGTTGCTGCGGCGACGTCCGCTTTGGAGTATCCAGGTGCTAGATCGGGCCTCCACGCCTCAATCAAATCAGGTTCGGGATTGAACTCAGTGATGGTTCGAGTAGGCTGTGGTCTTGGTAAGCCCTTTGGCTTGAGGTTGCCACGAAGACGAGAGCTTGTAGACGCTCGATCATCCTCAGTGGTCCCGGCTACAGAAGCACGGGAAATACCCTTCCATAAAT…	CTCGCTAGTTGTAAGCTTGGCGAGCTTCTCAGACTGAGCGCTCAAACT----CAGAGTGCCGCCGGTTAAGGAGGAAACCGCTGAAAGTGGTCCCCACCTCTCTCTGTTGTTCAAGACGGCTTCTTCTCTCCTCTTGAGGTGTTCTCGTCCCTCATGAACGGAACCTCCGGCGATCACTGTTGCTGCTGCAACGTCCGCCTTGGAGTATGTCGGTGCTAGATCGGGCCGCCACGCCTCAACCAAATCAGGATTTGGTCTAAATTCAGTTATGGTGCGGGTGGGCTGTGGCTTTGGAAGACCCGGTGGCTTGAGGGTGCCACGAAGGCGAGAGCCTGTGGAGGCTCGATCGCCTTCTGTAGTTGACG-TGGACCTG-ACAGG-CATACCTTCCCAGAA--…	1296	5674	HM804471.1 Beet western yellows virus strain BJ genotype A, complete genome
TRINITY_DN1185_c0_g1_i1	HM804472.1	67.378	1312	357	32	18	1296	5400	4127	4.38e-97	356	HM804472.1	394	884	884	71	67.38	1	-1	CTCACCAGTTGTTAACATGGCGAGTTTTTCTGACTGTGCGCTAAGCTTCTTCAATGCTCCGCCAGTAAGAGAGGAAGTTGAGGAAAGAAATCCCCATTTCTTCCTGCTATCCATTACTTTTGCTTCTCTACGCTCGAGCATATCTCTTCCCTCGTGAATACTCCCTCCTGCGAGTACTGTTGCTGCGGCGACGTCCGCTTTGGAGTATCCAGGTGCTAGATCGGGCCTCCACGCCTCAATCAAATCAGGTTCGGGATTGAACTCAGTGATGGTTCGAGTAGGCTGTGGTCTTGGTAAGCCCTTTGGCTTGAGGTTGCCACGAAGACGAGAGCTTGTAGACGCTCGATCATCCTC---AGTGGTCCCGGCTACAGAAGCACGGGAAATACCCTTCCATAA…	CTCGCTAGTTGTAAGCTTGGCGAGCTTCTCAGACTGAGCGCTCAACCTCAG-AGTGC--CGCCGGTTAAGGAGGAAACCGCTGAAAGTGGTCCCCACCTCTCTCTGTTGTTCAAGACGGCTTCTTCTCTCCTCTTGAGGTGTTCTCGTCCCTCATGAACGGAACCTCCGGCGATCACTGTTGCTGCTGCAACGTCCGCCTTGGAGTATGTCGGTGCTAGATCGGGCCGCCACGCCTCAACCAAATCAGGATTTGGTCTAAATTCAGTTATGGTGCGGGTGGGCTGTGGCTTTGGAAGACCCGGTGGCTTGAGGGTGCCACGAAGGCGAGAGCCTGTGGAGGCTCGATCGCCTTCTGTAGTTGACGTGGAT-CTGA-----TAGGCATACCTTCCCAGAA…	1296	5626	HM804472.1 Beet western yellows virus strain BJ genotype B, complete genome
TRINITY_DN1185_c0_g1_i1	KU315177.1	72.086	652	171	6	595	1238	4879	4231	1.18e-91	338	KU315177.1	374	470	470	11	72.09	1	-1	CCCTTGCGTGGTATTCTTCT---TGGCTCGTTCCCATTATTATCTTCGTCG---ATTGATACCGAGATTGCCCCCCACTCGCAATATTTCTCCGTGTAATTCCCGTATGAAACGGTGTAATTATATGAAGAATCCTTCTGTATAGGGGGGGGGTATATAGCCCAGCTTCCTTCCTCATCATCACATTCTAATTCGAAGGAAGCGGACCAATCGACTTCAACGGCCCGCGCAGTGTCAAAACTTTTACCATTCATTGTTGCGTCGGGATGTCCTGCCACAAAAGCTGTGTTAGATTGGTAATTTGTGATTTTACAGCCTTTGTAATTTCCTATATTCCAACCTCTTTGAGAAACATCGTAAGCGATATTTCCAAGCCAACTACCATCCAGTTCACCGCCA…	CCCTT-CGAGGGATTCTCCTGTTTGGCACGTTCCCGTTTTCATCGTCCTCATCTATTGAAACTGAAATCGCCCCCCATTCACAGTATTTCTCTGTATAATTTCCATATGATACTGTGTAATTGTACGAACTATCCTTTTGGATAGGGGGAGGGTATAATAACCAGCCTCCTTCGTCGTCATCGCATATGAGGTGGAATGAGGCGAACCAATCAACCTCTACAACCCGAGCTGTGTCAAAATGTTTTCCATTCATAGTTGCATCGGGGTGGCCGGGGACAAAGGTGGTGTTGTTTTGAAAGTTTTCTATCTTACAACCTTTGTACTCTCCGACCGTCCAACTCCGTTGAGATCTATCGTATGCGATGTTCCCCAGCCAACTCCCATCAATATCTCCGCCT…	1296	5813	KU315177.1 Pepo aphid-borne yellows virus isolate RSA_Pattypan, complete genome
TRINITY_DN1185_c0_g1_i1	KU315177.1	89.744	39	4	0	509	547	5056	5018	6.98e-06	53.6	KU315177.1	58	35	35	0	89.74	1	-1	GCTCTTCAAGCGAAGGAGTGTTAAAGTCTTGTCTTTGAC	GCACTTCTTGCGAAGGAGTGTTAAGGTCTTGTCTTTGAC	1296	5813	KU315177.1 Pepo aphid-borne yellows virus isolate RSA_Pattypan, complete genome
TRINITY_DN1185_c0_g1_i1	NC_030225.1	71.626	652	174	6	595	1238	4879	4231	7.42e-88	325	NC_030225.1	360	467	467	11	71.63	1	-1	CCCTTGCGTGGTATTCTTCT---TGGCTCGTTCCCATTATTATCTTCGTCG---ATTGATACCGAGATTGCCCCCCACTCGCAATATTTCTCCGTGTAATTCCCGTATGAAACGGTGTAATTATATGAAGAATCCTTCTGTATAGGGGGGGGGTATATAGCCCAGCTTCCTTCCTCATCATCACATTCTAATTCGAAGGAAGCGGACCAATCGACTTCAACGGCCCGCGCAGTGTCAAAACTTTTACCATTCATTGTTGCGTCGGGATGTCCTGCCACAAAAGCTGTGTTAGATTGGTAATTTGTGATTTTACAGCCTTTGTAATTTCCTATATTCCAACCTCTTTGAGAAACATCGTAAGCGATATTTCCAAGCCAACTACCATCCAGTTCACCGCCA…	CCCTT-CGAGGGATTCTCCTGTTTGGCACGTTCCCGTTTTCATCGTCCTCATCTATTGAAACTGAAATCGCCCCCCATTCACAGTATTTCTCTGTATAATTTCCATATGATACTGTGTAATTGTACGAACTATCCTTTTGGATAGGGGGAGGGTATAATAACCAGCCTCCTTCGTCGTCATCGCATATGAGGTGGAATGAGGCGAACCAATCAACCTCTACAACCCGAGCTGTGTCAAAATGTTTTCCATTCATAGTTGCATCGGGGTGGCCGGGGACAAAGGTGGTGTTGTTTTGAAAGTTTTCTATCTTGCAACCTTTGTACTCTCCGACCGTCCAACTCCGTTGAGATCTATCGTATGCGATGTTCCCCAGCCAACTCCCATCAATATCTCCGCCT…	1296	5813	NC_030225.1 Pepo aphid-borne yellows virus isolate RSA BB Marrow, complete genome
TRINITY_DN1185_c0_g1_i1	NC_030225.1	89.744	39	4	0	509	547	5056	5018	6.98e-06	53.6	NC_030225.1	58	35	35	0	89.74	1	-1	GCTCTTCAAGCGAAGGAGTGTTAAAGTCTTGTCTTTGAC	GCACTTCTTGCGAAGGAGTGTTAAGGTCTTGTCTTTGAC	1296	5813	NC_030225.1 Pepo aphid-borne yellows virus isolate RSA BB Marrow, complete genome
TRINITY_DN1185_c0_g1_i1	KT963000.1	66.85	727	216	13	523	1238	5119	4407	1.34e-46	188	KT963000.1	208	486	486	25	66.85	1	-1	GGAGTGTTAAAGTCTTGTCTTTGACTATTATCCCCTGAAAAAGATGG-TTCAGGGGTAGACCACGTCATTGCCCCCTTGCGTGGTATTCTTCTTGGCT-CGTTCCCATTATTATCTTCGTCGATTGATACCGAGATTGCCCCCCACTCGCA-ATATTTCTCCGTGTAATTCCCGTATGAAACGGTGTAATTATATGAAGAATCCTTCTGTATAGGGGGGGGGTATATAGCCCAGCTTCCTTCCTCATCATCACATTCTAATTCGAAGGAAGCGGACCAATCGACTTCAACGGCCCGCGCAGTGTCAAAACTTTTAC---CATTCATTGTTGCGTCGGGATGTCCTGCCACAAAAGCTGTGTTAGATTGGTAATTTGTGATTTTACAGCCTTTGTAATTT…	GGAGTTTTAAAGTCTTGTCTTTGACTCT----CCCAGAAGTACTCCGCTTCTGGCTCAGACCAACGCAATTCCCCCTTCGTTGGT-TTGATCTTGATTTCGTTCCCCTGATTATCTTCATCAACTGATATGGAGACGGTACCCCATTCACACATATT-CTCAGTGTATTCGCCATAGGAGACAGTGTAATTATATAAACTGTCTTTAGGGATGGGGGGAGCGTAAAGAATCCACGCTCCATCATCGTCATCACAAGTCAGTTGGAAGGAAGCATACCAATCAGCTTCCATACCCCGGGCTGCATCAAA---TTTACAGCCATTTATATTTAGATCGGGGTGACCCAGCACAAAGTTGGTTTTAGATTTATAATTTTCAATAACACAACTTTTGTAATTT…	1296	5855	KT963000.1 Phasey bean mild yellows virus isolate ESPCL15, complete genome
TRINITY_DN1185_c0_g1_i1	KT963000.1	74.648	71	18	0	196	266	5437	5367	0.000297	48.2	KT963000.1	52	53	53	0	74.65	1	-1	GTTGCTGCGGCGACGTCCGCTTTGGAGTATCCAGGTGCTAGATCGGGCCTCCACGCCTCAATCAAATCAGG	GTTGCAGCAGCTACGTCTTCCTTAGAGTATCCGACATTAATATCGGGCCTCCAAGCCTCAACTAAATCAGG	1296	5855	KT963000.1 Phasey bean mild yellows virus isolate ESPCL15, complete genome
TRINITY_DN1185_c0_g1_i1	NC_028793.1	66.621	728	216	15	523	1238	5115	4403	1.64e-45	185	NC_028793.1	204	485	485	27	66.62	1	-1	GGAGTGTTAAAGTCTTGTCTTTGACTATTATCCCCTGAA-AAAGATGGTTCAGGGGTAGACCACGTCATTGCCCCCTTGCGTGGTATTCTTCTTGGCT-CGTTCCCATTATTATCTTCGTCGATTGATACCGAGATTGCCCCCCACTCGCA-ATATTTCTCCGTGTAATTCCCGTATGAAACGGTGTAATTATATGAAGAATCCTTCTGTATAGGGGGGGGGTATATAGCCCAGCTTCCTTCCTCATCATCACATTCTAATTCGAAGGAAGCGGACCAATCGACTTCAACGGCCCGCGCAGTGTCAAAACTTTTAC---CATTCATTGTTGCGTCGGGATGTCCTGCCACAAAAGCTGTGTTAGATTGGTAATTTGTGATTTTACAGCCTTTGTAATTT…	GGAGTTTTAAAGTCTTGTCTTTGACTCT----CTCGGAAGAAATCTGCTTCCGGGTAAGACCAACGCAATTCCCCCTT-CGTTGGCTTGATCTTGATTTCGTTCCCCTGATTGTCTTCATCAACTGATATGGACACGGTACCCCATTCACACATATT-CTCAGTGTACTCACCATAAGAGACAGTGTAATTATACAAACTGTCCTTAGGGATGGGGGGAGCGTAAAGAATCCACGCTCCATCGTCGTCATCACAAGTCAGTTGGAAGGAAGCATACCAATCAGCTTCCATACCCCTGGCTGAATCAAA---TTTACAGCCATTTATATTTAAATCGGGGTGACCCAGCACAAAGTTGGTTTTAGATTTATAATTTTCAATAACACAACTTTTATAATTT…	1296	5867	NC_028793.1 Phasey bean mild yellows virus isolate NSWCP15, complete genome
TRINITY_DN1185_c0_g1_i1	NC_028793.1	70	110	33	0	196	305	5433	5324	8.5e-05	50	NC_028793.1	54	77	77	0	70	1	-1	GTTGCTGCGGCGACGTCCGCTTTGGAGTATCCAGGTGCTAGATCGGGCCTCCACGCCTCAATCAAATCAGGTTCGGGATTGAACTCAGTGATGGTTCGAGTAGGCTGTGG	GTTGCAGCAGCTACGTCTTCCTTAGAGTATCCGACATTAATATCGGGCCTCCAAGCCTCAACTAAATCAGGATTTGGTTCAAATTTTGTGATTGTTCTTGTTGGTTGAGG	1296	5867	NC_028793.1 Phasey bean mild yellows virus isolate NSWCP15, complete genome
TRINITY_DN1185_c0_g1_i1	NC_031747.1	64.697	694	220	10	619	1295	5240	4555	1.35e-27	125	NC_031747.1	138	449	449	25	64.7	1	-1	TCGTTCCCATTA------TTATCTTCGTCGATTGATACCGAGATTGCCCCCCACTCGCA-ATATTTCTCCGTGTAATTCCCGTATGAAACGGTGTAATTATATGAAGAATCCTTCTGTATAGGGGGGGGGTATA-TAGCCCAGCTTCCTTCCTCATCATCACATTCTAATTCGAAGGAAGCGGACCAATCGACTTCAACGGCCCGCGCAGTGTCAAAACTTTTACCATTCATTGTTGCGTCGGGATGTCCTGCCACAAAAGCTGTGTTAGATTGGTAATTTGTGATTTTACAGCCTTTGTAATTTCCTATATTCCAACCTCTTTGAGAAACATCGTAAGCGATATTTCCAAGCCAACTACCATCCAGTTCACCGCCAATATGCTTGACGACAAACTTAC…	TCGTTCCCAGTAGAGCCGTTGTCCTCATCTATAGATATTGAGACGGCACCCCATTCACACATATTT-TCTGTGTACTCACCATAAGAGACAGTGTAATTATACAAACTGTCCTTTGGGATTGGAGGTGCGTAAAGGAGCCAAG-AGCCCTCATCGTCATCACAAGTTAATTGAAATGAGGCATACCAGTCGGCTTCTACTCCCCTGGCTTTGTCAAACTTACAATCATTTAATTCTACATCAGGGTGACCATTCACAAAGGTGCTACTCATTTTATAATTTTCTATTACACATCCTTTGTAATTTCCGACATTCCACATTCTTCGAGAAGTGTCATACGCTATCAAACCTCTCCAGGTATTATCCGCTTTTCCACCTACACTCTTGACAGCCATCTGTC…	1296	6205	NC_031747.1 White clover mottle virus genomic RNA, complete genome, strain: CD
TRINITY_DN1185_c0_g1_i1	NC_034246.1	65.686	612	181	13	572	1167	4910	4312	1.35e-27	125	NC_034246.1	138	402	402	29	65.69	1	-1	CAGGGGTAGACCA--CGTCATTGCCCCCTTGCGTGGTATTCTTCTTGGCT-CGTTCCCATTA---TTATCTTCGTCGATTGATACCGAGATTGCCCCCCACTCGCAATATTTCTCCGTGTAATTCCCGTATGAAACGGTGTAATTATATGAAGAATCCTTCTGTATAGGGGGGGGGTATATAGCCCAGCTTCCTTCCTCATCATCACATTCTAATTCGAAGGAAGCGGACCAATCGACTTCAACGGCCCGCGCAGTGTCAAAACTTTTACCATTCATT--GTTG--CGTCGGGATGTCCTGCCACAAAAGCTGTGTTAGATTGGTAATTTGTGATTTTACAGCCTTTGTAATTTCCTATATTCCAACCT---CTTTGAGAAACATCGTAAGCGATATTT…	CAGGAGAAGCCCAGTCGTAATTTCCCCCT--CTGGGCTTTCTT-TTGACTTCGTTCCCTGTGCCGTTGTCCTCATCTATTGATATCGAGACTGAGGCCCATTCACAGTTTCTTTCTGTGTAAGCTCCATAGGAGACGGTATAGTTGAACCGATCATCCTTGGGAATAGGAGGGGCGTACAAACACCACGCTCCATCCTCGTCATCGCATGTTAATTGAAAAGAGAGGTAACAATCACACTCTACACCTCGGTCGCTCTCAAA---TTTGCAATT-ATTCAGTTCGACATCGGGGTGTCCGGCTACAAAGGTATTATTCTTTTGGTAATTCTCAATTACACAACCTTTGTAATTCCCAACATCCCAGGCTTTCCTGTGCGTATCAT---ACGCAATCAAT…	1296	5845	NC_034246.1 Cowpea polerovirus 1 isolate BE167, complete genome
TRINITY_DN1185_c0_g1_i1	NC_008249.1	65.278	720	216	18	591	1289	5011	4305	1.64e-26	122	NC_008249.1	134	470	470	34	65.28	1	-1	TGCCCCCTTGCGTGGTATTCTTCTTGGCT-CGTTCCCATTA------TTATCTTCGTCGATTGATACCGAGATTGCCCCCCACTCGCA-ATATTTCTCCGTGTAATTCCCGTATGAAACGGTGTAATTATATGAAGAATCCTTCTGTATAGGGGGGGGGTATATAGCCCAGCTTCCTTCCTCATCATCACATTCTAATTCGAAGGAAGCGGACCAATCGACTTCAACGGCCCGCGCAGTGTCAAAACTTTTACCATTCATTG--TTG--CGTCGGGATGTCCTGCCACAAAAGCTGT--GTTAGATTGGTAATTTGTGATTTTACAGCCTTTGTAATTTCCTATATTCCAACCTCTTTGAGAAACATCGTAAGCGATATTTCCAAGCCAACTACCATCC…	TGCCCCCTTCCG-GGTTTAATT-TTGACTTCGTTCCCTGTAGAGCTGTTGTCTTCATCAATTGATATTGATACGGCGCCCCATTCACACATATTT-TCTGTATATTCTCCATAAGAGACAGTATAGTTATACAAGCTGTCCTTTGGGATAGGTGGGGCGTACAGGATCCAAGATCCTTCGTCGTCATCACAAGTTAACTGGAACGACGCGTACCAATCTGCTTCTACTCCCCTGGCTTTATCAAA----TTTGCAATCATTGACTTCAACATCAGGGTGACCAAGCACAAA-GCTGTCCGTTTTCCTA-TAATTTTCTATGGTACAGCCTTTGTAATTACCAACATTCCACATTCTTCTGGAGGTGTCATACGCAATCAAGCCTCTCCAGGAATTATCC…	1296	5900	NC_008249.1 Chickpea chlorotic stunt virus, complete genome
TRINITY_DN1185_c0_g1_i1	NC_034247.1	64.573	796	236	21	523	1295	5041	4269	2.96e-23	111	NC_034247.1	122	514	514	46	64.57	1	-1	GGAGTGTTAAAGTCTTGTCTTTGACTATTATCCCCTGAAAAAGATGGTTCAGGGGTAGACCACGTCATTGCCCCCTTGCGTGGTATTCTTCTTGGC-TCGTTCCCATT---ATTATCTTCGTCGATTGATACCGAGATTGCCCCCCACTCGCA-ATATTTCTCCGTGTAATTCCCGTATGAAACGGTGTAATTATATGAAGAATCCTTCTGTATAGGGGGGGGGTATATAGCCCAGCTTCCTTCCTCATCATCACATTCTAA-TTCGAAGGAAGCGGACCAATCGACTTCAACGGCCCGCGCAGTGTCAAAACTTTTACCATTCATTGTT----GCGTCGGGATGTCCTGCCACAAAAGCTGTGTTAGATTGGTAATTTGTGATTTTACAGCCTTTGTA…	GGAGTTTTAGAGTCTTGTCTTTGACC----TCCCGGGAGTTCTTT--TTCCGGGGTTGACCACAGCATTTCCCCCTTCTGTGGTTTTAA----GGCATTGTTCCCCTGCTGATTGTCTTCGTCGATCGAAATCGAGACGGTACCCCATTCACACATGTTT-TCTGTGTACTCTCCATAGGATACAGTGTAATTGTACAAGCTGTCCTTAGGGATGGGGGGAGCGTATAGAACCCACGCTCCATCATCGTCATCACA-ACTAAGTTGGAAAGAAGCGTACCAATCAGCTTCCATCCCTCTGGCTTTGTCGAA---TTTGCAATT-ATTGATCACCAGATCAGGATGCCCCAAGACAAACTGGGTCTTCGATTTATAACTTTCGAAAACACAACCCTTCCA…	1296	5945	NC_034247.1 Cowpea polerovirus 2 isolate BE179, complete genome
TRINITY_DN1185_c0_g1_i1	AF352025.1	70.4	125	37	0	193	317	5349	5225	1.64e-07	59	AF352025.1	64	88	88	0	70.4	1	-1	ACTGTTGCTGCGGCGACGTCCGCTTTGGAGTATCCAGGTGCTAGATCGGGCCTCCACGCCTCAATCAAATCAGGTTCGGGATTGAACTCAGTGATGGTTCGAGTAGGCTGTGGTCTTGGTAAGCC	ACAGTGGCTGCTGCCACGTCTTCTTTGGAATATCCGGGATTCACGTCAGGTCGCCATGCCTCAACTAAGTCCGGTTTTGGATCGAAATCTCTGATTGTCCTAACTGGTTGTGGTCTTGGCAATCC	1296	5742	AF352025.1 Beet chlorosis virus isolate BChV-CR, complete genome
TRINITY_DN1185_c0_g1_i1	AF352025.1	80.303	66	10	3	485	548	5079	5015	8.5e-05	50	AF352025.1	54	53	53	3	80.3	1	-1	CCGA-TTCCAGAGCATCGGAACC-TCGCTCTTCAAGCGAAGGAGTGTTAAAGTCTTGTCTTTGACT	CCGACTTCCAGAGGGTCGGAACCCTCACTAATGTGGAGA-GGAGTTTTAAAGTCTTGTCTTTGACT	1296	5742	AF352025.1 Beet chlorosis virus isolate BChV-CR, complete genome
TRINITY_DN1185_c0_g1_i1	EU636990.1	100	28	0	0	522	549	4966	4939	2.44e-05	51.8	EU636990.1	56	28	28	0	100	1	-1	AGGAGTGTTAAAGTCTTGTCTTTGACTA	AGGAGTGTTAAAGTCTTGTCTTTGACTA	1296	5668	EU636990.1 Beet western yellows virus from China: Gansu, complete genome
TRINITY_DN1185_c0_g1_i1	EU636991.1	100	28	0	0	522	549	4966	4939	2.44e-05	51.8	EU636991.1	56	28	28	0	100	1	-1	AGGAGTGTTAAAGTCTTGTCTTTGACTA	AGGAGTGTTAAAGTCTTGTCTTTGACTA	1296	5668	EU636991.1 Beet western yellows virus from China: Inner Mongolia, complete genome
TRINITY_DN1185_c0_g1_i1	NC_004756.1	78.378	74	13	3	477	548	5010	4938	2.44e-05	51.8	NC_004756.1	56	58	58	3	78.38	1	-1	CTCTTCTTCCGA-TTCCAGAGCATCGGAAC-CTCGCTCTTCAAGCGAAGGAGTGTTAAAGTCTTGTCTTTGACT	CTCCTTTACCGACTTCCAGAGGGTCGGAACTCTCACTAATGTGGAGA-GGAGTTTTAAAGTCTTGTCTTTGACT	1296	5666	NC_004756.1 Beet western yellows virus, complete genome
TRINITY_DN1185_c0_g1_i1	AB903032.1	100	28	0	0	522	549	4969	4942	2.44e-05	51.8	AB903032.1	56	28	28	0	100	1	-1	AGGAGTGTTAAAGTCTTGTCTTTGACTA	AGGAGTGTTAAAGTCTTGTCTTTGACTA	1296	5670	AB903032.1 Beet western yellows virus genomic RNA, complete genome, strain: BWYV-Shimizu
TRINITY_DN1185_c0_g1_i1	AB903033.1	100	28	0	0	522	549	4908	4881	2.44e-05	51.8	AB903033.1	56	28	28	0	100	1	-1	AGGAGTGTTAAAGTCTTGTCTTTGACTA	AGGAGTGTTAAAGTCTTGTCTTTGACTA	1296	5545	AB903033.1 Beet western yellows virus genomic RNA, nearly complete genome, strain: BWYV-Memuro
TRINITY_DN1185_c0_g1_i1	AB903034.1	100	28	0	0	522	549	4908	4881	2.44e-05	51.8	AB903034.1	56	28	28	0	100	1	-1	AGGAGTGTTAAAGTCTTGTCTTTGACTA	AGGAGTGTTAAAGTCTTGTCTTTGACTA	1296	5545	AB903034.1 Beet western yellows virus genomic RNA, nearly complete genome, strain: BWYV-Kunneppu
TRINITY_DN1185_c0_g1_i1	AB903035.1	100	28	0	0	522	549	4908	4881	2.44e-05	51.8	AB903035.1	56	28	28	0	100	1	-1	AGGAGTGTTAAAGTCTTGTCTTTGACTA	AGGAGTGTTAAAGTCTTGTCTTTGACTA	1296	5545	AB903035.1 Beet western yellows virus genomic RNA, nearly complete genome, strain: BWYV-Otofukke
TRINITY_DN1185_c0_g1_i1	AB903036.1	100	28	0	0	522	549	4908	4881	2.44e-05	51.8	AB903036.1	56	28	28	0	100	1	-1	AGGAGTGTTAAAGTCTTGTCTTTGACTA	AGGAGTGTTAAAGTCTTGTCTTTGACTA	1296	5545	AB903036.1 Beet western yellows virus genomic RNA, nearly complete genome, strain: BWYV-Ikeda
TRINITY_DN1185_c0_g1_i1	AB903037.1	100	28	0	0	522	549	4908	4881	2.44e-05	51.8	AB903037.1	56	28	28	0	100	1	-1	AGGAGTGTTAAAGTCTTGTCTTTGACTA	AGGAGTGTTAAAGTCTTGTCTTTGACTA	1296	5545	AB903037.1 Beet western yellows virus genomic RNA, nearly complete genome, strain: BWYV-Kiyosato
TRINITY_DN1185_c0_g1_i1	AB903038.1	100	28	0	0	522	549	4908	4881	2.44e-05	51.8	AB903038.1	56	28	28	0	100	1	-1	AGGAGTGTTAAAGTCTTGTCTTTGACTA	AGGAGTGTTAAAGTCTTGTCTTTGACTA	1296	5545	AB903038.1 Beet western yellows virus genomic RNA, nearly complete genome, strain: BWYV-Ashoro
TRINITY_DN1185_c0_g1_i1	KM076647.1	80.303	66	10	3	485	548	5006	4942	8.5e-05	50	KM076647.1	54	53	53	3	80.3	1	-1	CCGA-TTCCAGAGCATCGGAACCTCGCTCTTCAAGCGA-AGGAGTGTTAAAGTCTTGTCTTTGACT	CCGACTTCCAGAGAGTCGGAAC-TCTCATTAACATCGAGAGGAGTTTTAAAGTCTTGTCTTTGACT	1296	5740	KM076647.1 Beet western yellows virus isolate LS, complete genome
TRINITY_DN1185_c0_g1_i1	LC198684.1	80.303	66	10	3	485	548	5006	4942	8.5e-05	50	LC198684.1	54	53	53	3	80.3	1	-1	CCGA-TTCCAGAGCATCGGAACCTCGCTCTTCAAGCGA-AGGAGTGTTAAAGTCTTGTCTTTGACT	CCGACTTCCAGAGAGTCGGAAC-TCTCATTAACATCGAGAGGAGTTTTAAAGTCTTGTCTTTGACT	1296	5750	LC198684.1 Beet western yellows virus genomic RNA, complete genome, isolate: Korea
TRINITY_DN1185_c0_g2_i1	NC_003688.1	92.675	1529	111	1	1	1529	5668	4141	0	2250	NC_003688.1	2494	1417	1417	1	92.67	1	-1	CACCGAAACGCCAGGGGGAATCCCCCTGTTTCCACATGAGTGGGAACGTTCGTTGCCTATCCTTTCGGAGTCGTTAACGTTTATACTCTCGTTCTTGAGTTTCCGGATTGAGCTTCGCCGCGTATTCCGGTGCCGCGCTACTTTAGGGTAGTAGGAACCCTTTAGGAGGTTTTATCAGCTAGCACTTTTTCGAGGTACTCGGCTGCGACAGTCGAACCCATTGAATTTTTAAGTCGTTGATATTGCACTCGCTCACCAGTTGTTAACATGGCGAGTTTTTCTGACTGTGCGCTAAGCTTCTTCAATGCTCCGCCAGTAAGAGAGGAAGTTGAGGAAAGAAATCCCCATTTCTTCCTGCTATCCATTACTTTTGCTTCTCTACGCTCGAGCATATCTCTT…	CACCGAAACGCCAGGGGGAATCCCCCTGTTTCCAC-TACGTGGGAACGTTCGTTGCCTATCCTTTCGGAGTCGTTAACGTTTATACTCTCGTTCTTGAGTTTCCGGATTGAGCTTCGCCGCGTATTCCGGTGCCGCGCTACTTCAGAGTAGTAGGAACTCTTTAGGAGGTTTTATCAGCAAGCACCTTTTCGAGATACTCAGCTGCAACAGTCGAACCCATTGAGTTTTTAAGTCGTTGATATTGCACTCGCTCGCCAGTTGTCAATGTGGCGAGCTTTTCCGATTGTGCGCTGAGCTTCTTCAATGCTCCGCTAGTAAGAGAGGAAGTTGAGGAGAGGATTCCCCATTTCTTCCTACTATCCATTACTTTTGCTTCTCTACGCTCGAGCATATCTCTT…	1530	5669	NC_003688.1 Cucurbit aphid-borne yellows virus, complete genome
TRINITY_DN1185_c0_g2_i1	JF939814.1	91.765	1530	125	1	1	1530	5671	4143	0	2188	JF939814.1	2426	1404	1404	1	91.76	1	-1	CACCGAAACGCCAGGGGGAATCCCCCTGTTTCCACATGAGTGGGAACGTTCGTTGCCTATCCTTTCGGAGTCGTTAACGTTTATACTCTCGTTCTTGAGTTTCCGGATTGAGCTTCGCCGCGTATTCCGGTGCCGCGCTACTTTAGGGTAGTAGGAACCCTTTAGGAGGTTTTATCAGCTAGCACTTTTTCGAGGTACTCGGCTGCGACAGTCGAACCCATTGAATTTTTAAGTCGTTGATATTGCACTCGCTCACCAGTTGTTAACATGGCGAGTTTTTCTGACTGTGCGCTAAGCTTCTTCAATGCTCCGCCAGTAAGAGAGGAAGTTGAGGAAAGAAATCCCCATTTCTTCCTGCTATCCATTACTTTTGCTTCTCTACGCTCGAGCATATCTCTT…	CACCGAAACGCCAGGGGGAATCCCTCTGTTTCCAC-TGAGTGGGAACGTTCGTTGCCTATCCTTTCGGAGTCGTTAACGTTTATACTCTCGTTCTTGAGTTTCCGGATTGAGCTTCGCCGCGTATTCCGGTGCCGCGCTACTTCAGAGTAGTAGGAACTCTTCAGGAGGTTTTATCAGCTAACACCTTTTCGAGGTACTCAGCCGCGACAGTTGAACCCATTGAATTCTTCAATCGTTGATATTGCACTCGCTCGCCAGTTGATAACATGGCAAGCTTTTCCGACTGTGCGCTGAGCTTCTTCAATGCTCCGCTAGTAAGAGAGGAAGTTGAAGAAAGGATTCCCCATTTCTTCCTACTATCCATTACTTTTGCTTCTCTACGCTCGAGCATATCTCTT…	1530	5672	JF939814.1 Cucurbit aphid-borne yellows virus strain Sq/2004/1.9, complete genome
TRINITY_DN1185_c0_g2_i1	JF939813.1	91.65	1533	124	2	1	1530	5674	4143	0	2183	JF939813.1	2420	1405	1405	4	91.65	1	-1	CACCGAAACGCCAGGGGGAATCCCCCTGTTTCCACATGAGTGGGAACGTTCGTTGCCTATCCTTTCGGAGTCGTTAACGTTTATACTCTCGTTCTTGAGTTTCCGGATTGAGCTTCGCCGCGTATTCCGGTGCCGCGCTACTTTAGGGTAGTAGGAACCCTTTAGGAGGTTTTATCAGCTAGCACTTTTTCGAGGTACTCGGCTGCGACAGTCGAACCCATTGAATTTTTAAGTCGTTGATATTGCACTCGCTCACCAGTTGTTAACATGGCGAGTTTTTCTGACTGTGCGCTAAGCTTCTTCAATGCTCCGCCAGTAAGAGAGGAAGTTGAGGAAAGAAATCCCCATTTCTTCCTGCTATCCATTACTTTTGCTTCTCTACGCTCGAGCATATCTCTT…	CACCGAAACGCCAGGGGGAATCCCTCTGTTTCCAC-TGAGTGGGAACGTTCGTTGCCTATCCTTTCGGAGTCGTTAACGTTTATACTCTCGTTCTTGAGTTTCCGGATTGAGCTTCGCCGCGTATTCCGGTGCCGCGCTACTTCAGAGTAGTAGGAACTCTTCAGGAGGTTTTATCAGCCAACACCTTTTCGAGGTACTCAGCCGCGACAGTTGAACCCATTGAATTCTTCAATCGTTGATATTGCACTCGCTCGCCAGTTGATAACATGGCAAGCTTTTCCGACTGTGCGCTGAGCTTCTTCAATGCTCCGCTAGTAAGAGAGGATGTTGAGGAAAGGATTCCCCATTTCTTCCTACTATCCATTACTTTTGCTTCTCTACGCTCGAGCATATCTCTG…	1530	5675	JF939813.1 Cucurbit aphid-borne yellows virus strain Sq/2005/9.2, complete genome
TRINITY_DN1185_c0_g2_i1	JF939812.1	91.503	1530	129	1	1	1530	5671	4143	0	2170	JF939812.1	2406	1400	1400	1	91.5	1	-1	CACCGAAACGCCAGGGGGAATCCCCCTGTTTCCACATGAGTGGGAACGTTCGTTGCCTATCCTTTCGGAGTCGTTAACGTTTATACTCTCGTTCTTGAGTTTCCGGATTGAGCTTCGCCGCGTATTCCGGTGCCGCGCTACTTTAGGGTAGTAGGAACCCTTTAGGAGGTTTTATCAGCTAGCACTTTTTCGAGGTACTCGGCTGCGACAGTCGAACCCATTGAATTTTTAAGTCGTTGATATTGCACTCGCTCACCAGTTGTTAACATGGCGAGTTTTTCTGACTGTGCGCTAAGCTTCTTCAATGCTCCGCCAGTAAGAGAGGAAGTTGAGGAAAGAAATCCCCATTTCTTCCTGCTATCCATTACTTTTGCTTCTCTACGCTCGAGCATATCTCTT…	CACCGAAACGCCAGGGGGAATCCCTCTGTTTCCAC-TGAGTGGGAACGTTCGTTGCCTATCCTTTCGGAGTCGTTAACGTTTATACTCTCGTTCTTGAGTTTCCGGATTGAGCTTCGCCGCGTATTCCGGTGCCGCGCTACTTCAGAGTAGTAGGAACTCTTCAGGAGGTTTTATCAGCTAACACCTTTTCGAGGTACTCAGCCGCGACAGTTGAACCCATTGAATTCTTCAATCGTTGATATTGCACTCGCTCGCCAGTTGATAACATGGCAAGCTTTTCCGACTGTGCGCTGAGCTTCTTCAATGCTCCGCTAGTAAGAGAGGAAGTTGAGGAAAGGATTCCCCATTTCTTCCTACTATCCATTACTTTTGCTTCTCTACGCTCGAGCATATCTCTT…	1530	5672	JF939812.1 Cucurbit aphid-borne yellows virus strain Sq/2003/7.2, complete genome
TRINITY_DN1185_c0_g2_i1	KR231949.1	85.055	1539	218	7	1	1530	5681	4146	0	1718	KR231949.1	1904	1309	1309	12	85.06	1	-1	CACCGAAACGCCAGGGGGAATCCCCCTGTTTCCACATGAGTGGGAACGTTCGTTGCCTATCCTTTCGGAGTCGTTAACGTTTATAC-TCTCGTTCTTGAGTTTCCGGATTGAGCTTCGCCGCGTATTCCGG-TGCCGCGCTACTTTAGGGTAGTAGGAAC----CCTTTAGGAGGTTTTATCAGCTAGCACTTTTTCGAGGTACTCGGCTGCGACAGTCGAACCCATTGAATTTTTAAGTCGTTGATATTGCACTCGCTCACCAGTTGTTAACATGGCGAGTTTTTCTGACTGTGCGCTAAGCTTCTTCAATGCTCCGCCAGTAAGAGAGGAAGTTGAGGAAAGAAATCCCCATTTCTTCCTGCTATCCATTACTTTTGCTTCTCTACGCTCGAGCATA…	CACCGAAACGCCAGGGGGAATCCCCCTGTTTCCACTAAGGTGGGAACGTTCGTTGCCTATCCTTTCGGAGTCGTTCCAATTT-TACATCTTTGGCTTGA-TGTCATCAGTGAT-TTGGTCGGGCCCACTGGATGCCGGGTGGAGTCACGCTCGTCTCCACAGAGCGGTTATGAGGTTTTATCAGCTAGCACCACTTCGAGATACTCTGCTGCAACAGTCTTGCCATGCGAATTCTTGATTCGCTCAAATTCTGCACGCTCACCAGTTGTCAGCTTGGCAAGCTTCTCCGACTGTGCGCTGAGTTTCTTTAGAGAACCGCTAGTGAGAGAGGAGGCTGAGGAAAGAATTCCCCATTTCTTCCTGCTATCCATCACTTTCTCGTCTCTTCGCCTAAGCATA…	1530	5682	KR231949.1 Cucurbit aphid-borne yellows virus isolate GS6, complete genome
TRINITY_DN1185_c0_g2_i1	EU636992.1	84.99	1539	219	7	1	1530	5681	4146	0	1714	EU636992.1	1900	1308	1308	12	84.99	1	-1	CACCGAAACGCCAGGGGGAATCCCCCTGTTTCCACATGAGTGGGAACGTTCGTTGCCTATCCTTTCGGAGTCGTTAACGTTTATAC-TCTCGTTCTTGAGTTTCCGGATTGAGCTTCGCCGCGTATTCCGG-TGCCGCGCTACTTTAGGGTAGTAGGAAC----CCTTTAGGAGGTTTTATCAGCTAGCACTTTTTCGAGGTACTCGGCTGCGACAGTCGAACCCATTGAATTTTTAAGTCGTTGATATTGCACTCGCTCACCAGTTGTTAACATGGCGAGTTTTTCTGACTGTGCGCTAAGCTTCTTCAATGCTCCGCCAGTAAGAGAGGAAGTTGAGGAAAGAAATCCCCATTTCTTCCTGCTATCCATTACTTTTGCTTCTCTACGCTCGAGCATA…	CACCGAAATGCCAGGGGGAGTCCCCCTGTTTCCACTAAGGTGGGAACGTTCGTTGCCTATCCTTTCGGAGTCGTTCCAATTT-TACATCTTTGGCTTGA-TGTCATCAGTGAT-TTGGTCGGGCCCACTGGATGCCGGGTGGAGTCACGCTCGTCTCCACAGAGCGGTTATGAGGTTTTATCAGCTAGCACCACTTCGAGATACTCTGCTGCAACAGTCTTGCCATGCGAGTTCTTGATTCGCTCAAATTCCGCACGCTCACCAGTTGTCAACTTGGCAAGCTTCTCCGACTGCGCGCTGAGTTTCTTTAGAGAACCGCTAGTGAGAGAGGAGGCTGAGGAAAGAATTCCCCATTTCTTCCTGCTATCCATCACTTTCTCGTCTCTTCGCCTGAGCATA…	1530	5682	EU636992.1 Cucurbit aphid-borne yellows virus from China: Xinjiang, complete genome
TRINITY_DN1185_c0_g2_i1	KR231947.1	84.99	1539	219	7	1	1530	5681	4146	0	1714	KR231947.1	1900	1308	1308	12	84.99	1	-1	CACCGAAACGCCAGGGGGAATCCCCCTGTTTCCACATGAGTGGGAACGTTCGTTGCCTATCCTTTCGGAGTCGTTAACGTTTATAC-TCTCGTTCTTGAGTTTCCGGATTGAGCTTCGCCGCGTATTCCGG-TGCCGCGCTACTTTAGGGTAGTAGGAAC----CCTTTAGGAGGTTTTATCAGCTAGCACTTTTTCGAGGTACTCGGCTGCGACAGTCGAACCCATTGAATTTTTAAGTCGTTGATATTGCACTCGCTCACCAGTTGTTAACATGGCGAGTTTTTCTGACTGTGCGCTAAGCTTCTTCAATGCTCCGCCAGTAAGAGAGGAAGTTGAGGAAAGAAATCCCCATTTCTTCCTGCTATCCATTACTTTTGCTTCTCTACGCTCGAGCATA…	CACCGAAACGCCAGGGGGAATCCCCCTGTTTCCACTAAAGTGGGAACGTTCGTTGCCTATCCTTTCGGAGTCGTTCCAATTT-TACATCTTTGGCTTGA-TGTCATCAGTG-GTTTGGTCAGGCTCACTGGATGCCGGGTGGAGTCACGCTCGTCTCCACAGAGCGGTTATGAGGTTTTGTCAGCTAGCACCATTTCGAGATACTCAGCGGCAACAGTCTTGCCATGCGAATTCTTGATTCGCTCGTATTCTGTGCGCTCACCAGTTGTTAACTTGGCAAGTTTCTCCGACTGTGCGCTGAGCTTCTTTAGAGAACCGCTAGTGAGAGAGGAAGCTGAGGAAAGAATTCCCCATTTCTTCCTGCTATCCATCACTTTCTCGTCCCTTCGTCTGAGCATA…	1530	5682	KR231947.1 Cucurbit aphid-borne yellows virus isolate GS1, complete genome
TRINITY_DN1185_c0_g2_i1	KR231952.1	84.73	1539	223	7	1	1530	5681	4146	0	1696	KR231952.1	1880	1304	1304	12	84.73	1	-1	CACCGAAACGCCAGGGGGAATCCCCCTGTTTCCACATGAGTGGGAACGTTCGTTGCCTATCCTTTCGGAGTCGTTAACGTTTATAC-TCTCGTTCTTGAGTTTCCGGATTGAGCTTCGCCGCGTATTCCGG-TGCCGCGCTACTTTAGGGTAGTAGGAAC----CCTTTAGGAGGTTTTATCAGCTAGCACTTTTTCGAGGTACTCGGCTGCGACAGTCGAACCCATTGAATTTTTAAGTCGTTGATATTGCACTCGCTCACCAGTTGTTAACATGGCGAGTTTTTCTGACTGTGCGCTAAGCTTCTTCAATGCTCCGCCAGTAAGAGAGGAAGTTGAGGAAAGAAATCCCCATTTCTTCCTGCTATCCATTACTTTTGCTTCTCTACGCTCGAGCATA…	CACCGAAACGCCAGGGGGAATCCCCCTGTTTCCACCAGGGTGGGAACGTTCGTTGCCTATCCTTTCGGAGTCGTTCCAATTT-TACATCTTTGGCTTGA-TGTCATCAGTGAT-TTGGTCGGGCCCACTGGATGCCGGGTGGAGTCACGCTCGTCTCCACAGAGCGGTTATGAGGTTTTATCAGCTAGCACCATTTCGAGATACTCTGCTGCAACAGTCTTGCCATGCGAATTCTTGATCCGCTCAAATTCTGCACGCTCACCAGTTGTTAACTTGGCAAGCTTCTCAGACTGCGCGCTGAGTTTCTTTAGAGAACCGCTAGTGAGAGAGGAGGCTGAGGAAAGAATTCCCCATTTCTTCCTGCTGTCCATCACTTTCTCGTCTCTTCGCCTAAGCATA…	1530	5682	KR231952.1 Cucurbit aphid-borne yellows virus isolate HS1, complete genome
TRINITY_DN1185_c0_g2_i1	EU000535.1	84.675	1540	222	8	1	1530	5681	4146	0	1691	EU000535.1	1874	1304	1304	14	84.68	1	-1	CACCGAAACGCCAGGGGGAATCCCCCTGTTTCCACATGAGTGGGAACGTTCGTTGCCTATCCTTTCGGAGTCGTTAACGTTTATAC-TCTCGTTCTTGAGTTTCCGGATTGAGCTTCGCC--GCGTATTCCGGTGCCGCGCTACTTTAGGGTAGTAGGAAC----CCTTTAGGAGGTTTTATCAGCTAGCACTTTTTCGAGGTACTCGGCTGCGACAGTCGAACCCATTGAATTTTTAAGTCGTTGATATTGCACTCGCTCACCAGTTGTTAACATGGCGAGTTTTTCTGACTGTGCGCTAAGCTTCTTCAATGCTCCGCCAGTAAGAGAGGAAGTTGAGGAAAGAAATCCCCATTTCTTCCTGCTATCCATTACTTTTGCTTCTCTACGCTCGAGCAT…	CACCGAAACGCCAGGGGGAATCCCCCTGTTTCCACTAAAGTGGGAACGTTCGTTGCCTATCCTTTCGGAGTCGTTCCAATTT-TACATCTTTGGCTTGA-TGTCATCAGTGAT-TTGGACAGGCTCACTGGGG-GCCGGGTGGAGTCACGCTTGTCCCCACAGAGCGATTATGAGGTTTTATCAGCTAGCACCATCTCGAGATACTCAGCTGCAACAGTCTTACCATGCGAATTCTTGATTCGCTCATATTCTGTACGCTCACCAGTAGTCAACTTGGCAAGCTTCTCTGACTGCGCGCTAAGCTTCCTTAGAGAACCGCTAGTGAGAGAGGAAGCTGAAGAAAGAACTCCCCATTTCTTCCTGCTATCCATCACTTTCTCGTCTCTTCGTCTGAGCAT…	1530	5682	EU000535.1 Cucurbit aphid-borne yellows virus, complete genome
TRINITY_DN1185_c0_g2_i1	KR231950.1	84.61	1540	224	8	1	1530	5679	4143	0	1685	KR231950.1	1868	1303	1303	13	84.61	1	-1	CACCGAAACGCCAGGGGGAATCCCCCTGTTTCCACATGAGTGGGAA-CGTTCGTTGCCTATCCTTTCGGAGTCGTTAACGTTTATAC-TCTCGTTCTTGAGTTTCCGGATTGAGCTTCGCCGCGTATTCCGG-TGCCGCGCTACTTTAGGGTAGTAGGAAC----CCTTTAGGAGGTTTTATCAGCTAGCACTTTTTCGAGGTACTCGGCTGCGACAGTCGAACCCATTGAATTTTTAAGTCGTTGATATTGCACTCGCTCACCAGTTGTTAACATGGCGAGTTTTTCTGACTGTGCGCTAAGCTTCTTCAATGCTCCGCCAGTAAGAGAGGAAGTTGAGGAAAGAAATCCCCATTTCTTCCTGCTATCCATTACTTTTGCTTCTCTACGCTCGAGCAT…	CACCGAAACGCCAGGGGGAATCCCCCTGTTTCCACTAAGGTGGGAAACGTTCGTTGCCTATCCTTTCGGAGTCGTTCCAATTT-TACATCTTTGGCTTGA-TGTCATCAGTGAT-TTGGTCGGGCTCACTGGATGCCGGGTGGAGTCACGCTCGTCTCCACAGAGCGGTTATGAGGTTTTATCAGCTAGCACCAATTCGAGATACTCTGCTGCGACAGTCTTGCCATGCGAATTCTTGATTCGCTCAAATTCTGCACGCTCACCAGTTGTCAACTTGGCAAGCTTCTCCGACTGCGCGCTGAGTTTCTTCAGAGAACCGCTAGTGAGAGAGGAGGCTGAGGAAAGAATTCCCCATTTCTTCCTGCTATCCATCACTTTCTCGTCTCTTCGACTAAGCAT…	1530	5680	KR231950.1 Cucurbit aphid-borne yellows virus isolate HD1, complete genome
TRINITY_DN1185_c0_g2_i1	HQ439023.1	84.545	1540	224	8	1	1530	5690	4155	0	1682	HQ439023.1	1864	1302	1302	14	84.55	1	-1	CACCGAAACGCCAGGGGGAATCCCCCTGTTTCCACATGAGTGGGAACGTTCGTTGCCTATCCTTTCGGAGTCGTTA-ACGTTTATA-CTCTCGTTCTTGAGTTTCCGGATTGAGCTTCGCCGCGTATTCCGGT-GCCGCGCTACTTTAGGGTAGTAGGAAC----CCTTTAGGAGGTTTTATCAGCTAGCACTTTTTCGAGGTACTCGGCTGCGACAGTCGAACCCATTGAATTTTTAAGTCGTTGATATTGCACTCGCTCACCAGTTGTTAACATGGCGAGTTTTTCTGACTGTGCGCTAAGCTTCTTCAATGCTCCGCCAGTAAGAGAGGAAGTTGAGGAAAGAAATCCCCATTTCTTCCTGCTATCCATTACTTTTGCTTCTCTACGCTCGAGCAT…	CACCGAAACGCCAGGGGGAATCCCCCTGTTTCCACTAAGGTGGGAACGTTCGTTGCCTATCCTTTCGGAGTCGTTCCAATTTTACATCTTTGGTT--TGA-TGTCATCAGTGAT-TTGGTCAGGCTCACTGGACGCCGGGTGGAGTCACGCTCGTCTCCACAGAGCGGTTATGAGGTTTTGTCAGCTAGCACCATCTCGAGATACTCAGCTGCAACAGTCTTGCCATGCGAATTCTTGATTCGCTCAAATTCTGCACGCTCACCAGTAGTCAACTTGGCAAGCTTCTCCGACTGTGCGCTGAGTTTCTTTAGAGAACCGCTAGTGAGAGAGGAAGCTGAGGAAAGAATTCCCCATTTCTTCCTGCTATCCATCACTTTCTCGTCTCTTCGCCTAAGCAT…	1530	5691	HQ439023.1 Cucurbit aphid-borne yellows virus strain CABYV-CZ, complete genome
TRINITY_DN1185_c0_g2_i1	KR231951.1	84.545	1540	225	8	1	1530	5682	4146	0	1680	KR231951.1	1862	1302	1302	13	84.55	1	-1	CACCGAAACGCCAGGGGGAATCCCCCTGTTTCCACATGAGTGGGAA-CGTTCGTTGCCTATCCTTTCGGAGTCGTTAACGTTTATAC-TCTCGTTCTTGAGTTTCCGGATTGAGCTTCGCCGCGTATTCCGG-TGCCGCGCTACTTTAGGGTAGTAGGAAC----CCTTTAGGAGGTTTTATCAGCTAGCACTTTTTCGAGGTACTCGGCTGCGACAGTCGAACCCATTGAATTTTTAAGTCGTTGATATTGCACTCGCTCACCAGTTGTTAACATGGCGAGTTTTTCTGACTGTGCGCTAAGCTTCTTCAATGCTCCGCCAGTAAGAGAGGAAGTTGAGGAAAGAAATCCCCATTTCTTCCTGCTATCCATTACTTTTGCTTCTCTACGCTCGAGCAT…	CACCGAAACGCCAGGGGGAATCCCCCTGTTTCCACTAAGGTGGGAAACGTTCGTTGCCTATCCTTTCGGAGTCGTTCCAATTT-TACATCTTTGGCTTGA-TGTCATCAGTGAT-TTGGTCGGGCTCACTGGATGCCGGGTGGAGTCACGCTCGTCTCCACAGAGCGGTTATGAGGTTTTATCAGCTAGCACCAATTCGAGATACTCTGCTGCGACAGTCTTGCCATGCGAATTCTTGATTCGCTCAAATTCTGCACGCTCACCAGTTGTCAACTTGGCAAGCTTCTCCGACTGCGCGCTGAGTTTCTTCAGAGAACCGCTAGTGAGAGAGGAGGCTGAGGAAAGAATTCCCCATTTCTTCCTGCTATCCATCACTTTCTCGTCTCTTCGACTAAGCAT…	1530	5683	KR231951.1 Cucurbit aphid-borne yellows virus isolate HD118, complete genome
TRINITY_DN1185_c0_g2_i1	LC082306.1	84.465	1532	226	7	1	1523	5681	4153	0	1669	LC082306.1	1850	1294	1294	12	84.46	1	-1	CACCGAAACGCCAGGGGGAATCCCCCTGTTTCCACATGAGTGGGAACGTTCGTTGCCTATCCTTTCGGAGTCGTTAACGTTTATAC-TCTCGTTCTTGAGTTTCCGGATTGAGCTTCGCCGCGTATTCCGGT-GCCGCGCTACTTTAGGGTAGTAGGAAC----CCTTTAGGAGGTTTTATCAGCTAGCACTTTTTCGAGGTACTCGGCTGCGACAGTCGAACCCATTGAATTTTTAAGTCGTTGATATTGCACTCGCTCACCAGTTGTTAACATGGCGAGTTTTTCTGACTGTGCGCTAAGCTTCTTCAATGCTCCGCCAGTAAGAGAGGAAGTTGAGGAAAGAAATCCCCATTTCTTCCTGCTATCCATTACTTTTGCTTCTCTACGCTCGAGCATA…	CACCGAAACGCCAGGGGGAATCCCCCTGTTTCCACTAAGGTGGGAACGTTCGTTGCCTATCCTTTCGGAGTCGTTCCAATTT-TACATCTTTGGCTTGA-TGTCATCAGTGAT-TTGGTCGGGCACACTGATAGCCGGGTGGAGTCACGCTCGTCTCCACAGAGCGGTTATGAGGTTTTATCAGCTAGCACCACTTCGAGATACTCAGCTGCAACAGTCTTGCCATGCGAATTCTTGATTCGTTCAAATTCTGCACGCTCGCCAGTTGTTAACTTGGCAAGCTTTTCCGACTGCGCGCTGAGTTTCTTTAGAGAACCGCTAGTGAGAGAGGAAGCTGAGGAAAGAATTCCCCATTTCTTCCTACTATCCATCACTTTCTCATCTCTTCGCCTAAGCATA…	1530	5688	LC082306.1 Cucurbit aphid-borne yellows virus genomic RNA, complete genome, isolate: K1
TRINITY_DN1185_c0_g2_i1	GQ221223.1	83.951	1539	235	7	1	1530	5681	4146	0	1642	GQ221223.1	1820	1292	1292	12	83.95	1	-1	CACCGAAACGCCAGGGGGAATCCCCCTGTTTCCACATGAGTGGGAACGTTCGTTGCCTATCCTTTCGGAGTCGTTAACGTTTATAC-TCTCGTTCTTGAGTTTCCGGATTGAGCTTCGCCGCGTATTCCGG-TGCCGCGCTACTTTAGGGTAGTAGGAAC----CCTTTAGGAGGTTTTATCAGCTAGCACTTTTTCGAGGTACTCGGCTGCGACAGTCGAACCCATTGAATTTTTAAGTCGTTGATATTGCACTCGCTCACCAGTTGTTAACATGGCGAGTTTTTCTGACTGTGCGCTAAGCTTCTTCAATGCTCCGCCAGTAAGAGAGGAAGTTGAGGAAAGAAATCCCCATTTCTTCCTGCTATCCATTACTTTTGCTTCTCTACGCTCGAGCATA…	CACCGAAACGCCAGGGGGAATTCCCCTGTTTCCACTAAGGTGGGAACGTTCGTTGCCTATCCTTCCGGAGTCGTTCCAATTT-TACATCTTTGGCTTGA-TGTCATCAGTGAT-TTGGTCGGGCCCACTGGCTGCCGGGTGGAGTCACGCTCGTCTCCACAGAGCGGTTATGAGGTTTTATCAGCTAGCACCACTTCGAGATACTCTGCTGCAACAGTCTTACCACGCGAATTCTTGATTCGCTCAAATTCTGCACGCTCACCAGTTGTCAACTTGGCAAGCTTCTCCGACTGCGCGCTGAGTTTCTTTAGAGAACCGCTAGTGAGAGAGGAGGCTGAGGAAAGAATTCCCCATTTCTTCCTGCTATCCATCACTTTCTCGTCTCTTCGCCTAAGCATA…	1530	5682	GQ221223.1 Cucurbit aphid-borne yellows virus isolate CABYV-FJ, complete genome
TRINITY_DN1185_c0_g2_i1	GQ221224.1	83.831	1540	235	9	1	1530	5681	4146	0	1627	GQ221224.1	1804	1291	1291	14	83.83	1	-1	CACCGAAACGCCAGGGGGAATCCCCCTGTTTCCACATGAGTGGGAACGTTCGTTGCCTATCCTTTCGGAGTCGTTAACGTTTATAC-TCTCGTTCTTGAGTTTCCGGATTGAGCTTCGCCGCGTATTCCGG-TGCCGCGCTACTTTAGGGTAGTAGGAAC----CCTTTAGGAGGTTTTATCAGCTAGCACTTTTTCGAGGTACTCGGCTGCGACAGTCGAACCCATTGAATTTTTAAGTCGTTGATATTGCACT-CGCTCACCAGTTGTTAACATGGCGAGTTTTTCTGACTGTGCGCTAAGCTTCTTCAATGCTCCGCCAGTAAGAGAGGAAGTTGAGGAAAGAAATCCCCATTTCTTCCTGCTATCCATTACTTTTGCTTCTCTACGCTCGAGCAT…	CACCGAAACGCCAGGGGGAATCCCCCTGTCTCCACTAAAGTGGGAACGTTCGTTGCCTATCCTTTCGGAGTCGTTCCAATTT-TACATCTTTGGCTTGA-TGTCATCAGTGAT-TTGGTCGGGCTCACTGGATGCCGGGTGGAGTCACGCTTGTCTCCACAGAGCGGTTATGAGGTTTTGTCAGCTAGCACCAGTTCGAGATACTCGGCTGCAACAGTCTTACCTTGCGAGTTTTTAATTCGCTCATATT-CTCTACGCTCGCCAGTTGTCAACTTGGCGAGCTTTTCTGACTGTGCACTAAGTTTCTTTAAAGAGCCACTAGTGAGAGTAGAAGCCGAGGAGAGAACTCCCCATTTCTTCCTGCTATCCATCACTGACTCTTCTCTTCGCCTGAGCAT…	1530	5682	GQ221224.1 Cucurbit aphid-borne yellows virus isolate CABYV-JAN, complete genome
TRINITY_DN1185_c0_g2_i1	KR231955.1	83.549	1544	232	12	1	1530	5681	4146	0	1606	KR231955.1	1780	1290	1290	22	83.55	1	-1	CACCGAAACGCCAGGGGGAATCCCCCTGTTTCCACATGAGTGGGAACGTTCGTTGCCTATCCTTTCGGAGTCGTTAACGTTTATAC-TCTCGTTCTTGAGTT--TCCG-GATTGAGCTTCGC-CGC-GTATTCC----GGTGCCGCGCTACTTTAGGGTAGTAGGAACCCTTTAGGAGGTTTTATCAGCTAGCACTTTTTCGAGGTACTCGGCTGCGACAGTCGAACCCATTGAATTTTTAAGTCGTTGATATTGCACT-CGCTCACCAGTTGTTAACATGGCGAGTTTTTCTGACTGTGCGCTAAGCTTCTTCAATGCTCCGCCAGTAAGAGAGGAAGTTGAGGAAAGAAATCCCCATTTCTTCCTGCTATCCATTACTTTTGCTTCTCTACGCTCGA…	CACCGAAACGCCAGGGGGGGTCCCCCTGTTTCCACTAAAGTGGTAACGTTCGCTGCCTATCCTTTCGGAGTCGTTCCAATTT-TACATCTTTGGCTTGATGTCATCAGTGATTAGGACGGGCTCACTGGAAGCCAGATGGAGTCACGC-ACGTCTCCACAG-----AGCGGTTATGAGGTTTTGTCAGCTAGCACCAGTTCGAGATACTCGGCTGCAACAGTCTTACCTTGCGAGTTTTTAATTCGCTCATATT-CTCTACGCTCGCCAGTTGTCAACTTGGCGAGCTTTTCTGACTGTGCACTGAGTTTCTTTAAAGAGCCACTAGTGAGAGTGGAAACTGAGGAGAGAACTCCCCATTTCTTCCTGCTATCCATCACTGACTCTTCTCTTCGCCTTA…	1530	5682	KR231955.1 Cucurbit aphid-borne yellows virus isolate NW2, complete genome
TRINITY_DN1185_c0_g2_i1	KR231960.1	83.549	1544	232	12	1	1530	5681	4146	0	1606	KR231960.1	1780	1290	1290	22	83.55	1	-1	CACCGAAACGCCAGGGGGAATCCCCCTGTTTCCACATGAGTGGGAACGTTCGTTGCCTATCCTTTCGGAGTCGTTAACGTTTATAC-TCTCGTTCTTGAGTT--TCCG-GATTGAGCTTCGC-CGC-GTATTCC----GGTGCCGCGCTACTTTAGGGTAGTAGGAACCCTTTAGGAGGTTTTATCAGCTAGCACTTTTTCGAGGTACTCGGCTGCGACAGTCGAACCCATTGAATTTTTAAGTCGTTGATATTGCACT-CGCTCACCAGTTGTTAACATGGCGAGTTTTTCTGACTGTGCGCTAAGCTTCTTCAATGCTCCGCCAGTAAGAGAGGAAGTTGAGGAAAGAAATCCCCATTTCTTCCTGCTATCCATTACTTTTGCTTCTCTACGCTCGA…	CACCGAAACGCCAGGGGGGGTCCCCCTGTTTCCACTAAAGTGGTAACGTTCGTTGCCTATCCTTTCGGAGTCGTTCCAATTT-TACATCTTTGGCTTGATGTCATCAGTGATTAGGACGGGCTCACTGGAAGCCAGATGGAGTCACGC-ACGTCTCCACAG-----AGCGGTTATGAGGTTTTGTCAGCTAGCACCAGTTCGAGATACTCAGCTGCAACAGTCTTACCTTGCGAGTTTTTAATTCGCTCATATT-CTCTACGCTCGCCAGTTGTCAGCTTGGCGAGCTTTTCTGACTGTGCACTGAGTTTCTTTAAAGAGCCACTAGTGAGAGTGGAAGCTGAGGAGAGAACTCCCCATTTCTTCCTGCTATCCATCACTAACTCTTCTCTTCGCCTGA…	1530	5682	KR231960.1 Cucurbit aphid-borne yellows virus isolate SW1(14), complete genome
TRINITY_DN1185_c0_g2_i1	KR231959.1	83.56	1545	231	13	1	1530	5682	4146	0	1604	KR231959.1	1778	1291	1291	23	83.56	1	-1	CACCGAAACGCCAGGGGGAATCCCCC-TGTTTCCACATGAGTGGGAACGTTCGTTGCCTATCCTTTCGGAGTCGTTAACGTTTATAC-TCTCGTTCTTGAGTT--TCCG-GATTGAGCTTCGC-CGC-GTATTCC----GGTGCCGCGCTACTTTAGGGTAGTAGGAACCCTTTAGGAGGTTTTATCAGCTAGCACTTTTTCGAGGTACTCGGCTGCGACAGTCGAACCCATTGAATTTTTAAGTCGTTGATATTGCACT-CGCTCACCAGTTGTTAACATGGCGAGTTTTTCTGACTGTGCGCTAAGCTTCTTCAATGCTCCGCCAGTAAGAGAGGAAGTTGAGGAAAGAAATCCCCATTTCTTCCTGCTATCCATTACTTTTGCTTCTCTACGCTCG…	CACCGAAACGCCAGGGGGGGTCCCCCCTGTTTCCACTAAAGTGGTAACGTTCGTTGCCTATCCTTTCGGAGTCGTTCCAATTT-TACATCTTTGGCTTGATGTCATCAGTGATTAGGACGGGCTCACTGGAAGCCAGATGGAGTCACGC-ACGTCTCCACAG-----AGCGGTTATGAGGTTTTGTCAGCTAGCACCAGTTCGAGATACTCGGCTGCGACAGTCTTACCTTGCGAGTTTTTAATTCGTTCATATT-CTCTACGCTCGCCAGTTGTCAACTTGGCGAGCTTTTCTGACTGTGCACTGAGTTTCTTTAAAGAGCCACTAGTGAGAGTGGAAGCTGAGGAGAGAACTCCCCATTTCTTCCTGCTATCCATCACTGACTCTCCTCTTCGCCTT…	1530	5683	KR231959.1 Cucurbit aphid-borne yellows virus isolate SW1, complete genome
TRINITY_DN1185_c0_g2_i1	KR231961.1	83.56	1545	231	13	1	1530	5682	4146	0	1604	KR231961.1	1778	1291	1291	23	83.56	1	-1	CACCGAAACGCCAGGGGGAATCCCCC-TGTTTCCACATGAGTGGGAACGTTCGTTGCCTATCCTTTCGGAGTCGTTAACGTTTATAC-TCTCGTTCTTGAGTT--TCCG-GATTGAGCTTCGC-CGC-GTATTCC----GGTGCCGCGCTACTTTAGGGTAGTAGGAACCCTTTAGGAGGTTTTATCAGCTAGCACTTTTTCGAGGTACTCGGCTGCGACAGTCGAACCCATTGAATTTTTAAGTCGTTGATATTGCACT-CGCTCACCAGTTGTTAACATGGCGAGTTTTTCTGACTGTGCGCTAAGCTTCTTCAATGCTCCGCCAGTAAGAGAGGAAGTTGAGGAAAGAAATCCCCATTTCTTCCTGCTATCCATTACTTTTGCTTCTCTACGCTCG…	CACCGAAACGCCAGGGGGGGTCCCCCCTGTTTCCACTAAAGTGGTAACGTTCGTTGCCTATCCTTTCGGAGTCGTTCCAATTT-TACATCTTTGGCTTGATGTCATCAGTGATTAGGACGGGCTCACTGGAAGCCAGATGGAGTCACGC-ACGTCTCCACAG-----AGCGGTTATGAGGTTTTGTCAGCTAGCACCAGTTCGAGATACTCGGCTGCGACAGTCTTACCTTGCGAGTTTTTAATTCGTTCATATT-CTCTACGCTCGCCAGTTGTCAACTTGGCGAGCTTTTCTGACTGTGCACTGAGTTTCTTTAAAGAGCCACTAGTGAGAGTGGAAGCTGAGGAGAGAACTCCCCATTTCTTCCTGCTATCCATCACTGACTCTCCTCTTCGCCTT…	1530	5683	KR231961.1 Cucurbit aphid-borne yellows virus isolate SW2, complete genome
TRINITY_DN1185_c0_g2_i1	KR231963.1	83.431	1539	242	8	1	1530	5680	4146	0	1602	KR231963.1	1776	1284	1284	13	83.43	1	-1	CACCGAAACGCCAGGGGGAATCCCCCTGTTTCCACATGAGTGGGAACGTTCGTTGCCTATCCTTTCGGAGTCGTTAACGTTTATAC-TCTCGTTCTTGAGTTTCCGGATTGAGCTTCGCCGCGTATTCCGGTGCCGCGCTACTTTAGGGTAGT----AGGAACCCTTTAGGAGGTTTTATCAGCTAGCACTTTTTCGAGGTACTCGGCTGCGACAGTCGAACCCATTGAATTTTTAAGTCGTTGATATTGCACT-CGCTCACCAGTTGTTAACATGGCGAGTTTTTCTGACTGTGCGCTAAGCTTCTTCAATGCTCCGCCAGTAAGAGAGGAAGTTGAGGAAAGAAATCCCCATTTCTTCCTGCTATCCATTACTTTTGCTTCTCTACGCTCGAGCATA…	CACCGAAACGCCAGGGGGGGTCCCCCTGTTTCCACTAAAGTGGTAACGTTCGTTGCCTATCCTTTCGGAGTCGTTCCAATTT-TACATCTTTGGCTTGA-TGTCATCAGTGAT-TAGGACGGGCTCACTGGAGCCAGATGGAGTCACGCACGTCTCCACAAAGCGGTTATGAGGTTTTGTCAGCTAGCACCAGTTCGAGATACTCAGCTGCAACAGTCTTACCTTGCGAGTTTTTAATTCGCTCATATT-CTCTACGCTCGCCAGTTGTCAGCTTGGCGAGCTTTTCTGACTGTGCACTGAGTTTCTTTAAAGAGCCACTAGTGAGAGTGGAAGCTGAGGAGAGAACTCCCCATTTCTTCCTGCTATCCATCACTGACTCTTCTCTCCGCCTGAGCATA…	1530	5681	KR231963.1 Cucurbit aphid-borne yellows virus isolate SW64, complete genome
TRINITY_DN1185_c0_g2_i1	KR231943.1	83.484	1544	233	12	1	1530	5681	4146	0	1600	KR231943.1	1774	1289	1289	22	83.48	1	-1	CACCGAAACGCCAGGGGGAATCCCCCTGTTTCCACATGAGTGGGAACGTTCGTTGCCTATCCTTTCGGAGTCGTTAACGTTTATAC-TCTCGTTCTTGAGTT--TCCG-GATTGAGCTTCGC-CGC-GTATTCC----GGTGCCGCGCTACTTTAGGGTAGTAGGAACCCTTTAGGAGGTTTTATCAGCTAGCACTTTTTCGAGGTACTCGGCTGCGACAGTCGAACCCATTGAATTTTTAAGTCGTTGATATTGCACT-CGCTCACCAGTTGTTAACATGGCGAGTTTTTCTGACTGTGCGCTAAGCTTCTTCAATGCTCCGCCAGTAAGAGAGGAAGTTGAGGAAAGAAATCCCCATTTCTTCCTGCTATCCATTACTTTTGCTTCTCTACGCTCGA…	CACCGAAACGCCAGGGGGGGTCCCCCTGTTTCCACTAAAGTGGTAACGTTCGTTGCCTATCCTTTCGGAGTCGTTCCAATTT-TACATCTTTGGCTTGATGTCATCAGTGATTAGGACGGGCTCACTGGAAGCCAGATGGAGTCACGC-ACGTCTCCACAG-----AGCGGTTATGAGGTTTTGTCAGCTAGCACCAGTTCGAGAAACTCGGCTGCAACAGTCTTACCTTGCGAGTTTTTAATTCGCTCATATT-CTCTACGCTCGCCAGTTGTCAACTTGGCGAGCTTTTCTGACTGTGCACTGAGTTTCTTTAAAGAGCCACTAGTGAGAGTGGAAGCTGAGGAGAGAACTCCCCATTTCTTCCTGCTATCCATCACTGACTCTTCTCTTCGCCTTA…	1530	5682	KR231943.1 Cucurbit aphid-borne yellows virus isolate CY4, complete genome
TRINITY_DN1185_c0_g2_i1	KR231953.1	83.484	1544	233	12	1	1530	5681	4146	0	1600	KR231953.1	1774	1289	1289	22	83.48	1	-1	CACCGAAACGCCAGGGGGAATCCCCCTGTTTCCACATGAGTGGGAACGTTCGTTGCCTATCCTTTCGGAGTCGTTAACGTTTATAC-TCTCGTTCTTGAGTT--TCCG-GATTGAGCTTCGC-CGC-GTATTCC----GGTGCCGCGCTACTTTAGGGTAGTAGGAACCCTTTAGGAGGTTTTATCAGCTAGCACTTTTTCGAGGTACTCGGCTGCGACAGTCGAACCCATTGAATTTTTAAGTCGTTGATATTGCACT-CGCTCACCAGTTGTTAACATGGCGAGTTTTTCTGACTGTGCGCTAAGCTTCTTCAATGCTCCGCCAGTAAGAGAGGAAGTTGAGGAAAGAAATCCCCATTTCTTCCTGCTATCCATTACTTTTGCTTCTCTACGCTCGA…	CACCGAAACGCCAGGGGGGGTCCCCCTGTTTCCACTAAAGTGGTAACGTTCGTTGCCTATCCTTTCGGAGTCGTTCCAATTT-TACATCTTTGGCTTGATGTCATCAGTGATTAGGACGGGCTCACTGGAAGCCAGATGGAGTCACGC-ACGTCTCCACAG-----AGCGGTTATGAGGTTTTGTCAGCTAGCACCAGTTCGAGATACTCAGCTGCAACAGTCTTACCTTGCGAGTTTTTAATTCGCTCATATT-CTCTACGCTCGCCAGTTGTCAGCTTGGCGAGCTTTTCTGACTGTGCACTGAGTTTCTTTAAAGAGCCACTAGTGAGAGTGGAAGCTGAGGAGAGAACTCCCCATTTCTTCCTGCTATCCATCACTGACTCTTCTCTTCGCCTGA…	1530	5682	KR231953.1 Cucurbit aphid-borne yellows virus isolate HS2, complete genome
TRINITY_DN1185_c0_g2_i1	KR231962.1	83.484	1544	233	12	1	1530	5681	4146	0	1600	KR231962.1	1774	1289	1289	22	83.48	1	-1	CACCGAAACGCCAGGGGGAATCCCCCTGTTTCCACATGAGTGGGAACGTTCGTTGCCTATCCTTTCGGAGTCGTTAACGTTTATAC-TCTCGTTCTTGAGTT--TCCG-GATTGAGCTTCGC-CGC-GTATTCC----GGTGCCGCGCTACTTTAGGGTAGTAGGAACCCTTTAGGAGGTTTTATCAGCTAGCACTTTTTCGAGGTACTCGGCTGCGACAGTCGAACCCATTGAATTTTTAAGTCGTTGATATTGCACT-CGCTCACCAGTTGTTAACATGGCGAGTTTTTCTGACTGTGCGCTAAGCTTCTTCAATGCTCCGCCAGTAAGAGAGGAAGTTGAGGAAAGAAATCCCCATTTCTTCCTGCTATCCATTACTTTTGCTTCTCTACGCTCGA…	CACCGAAACGCCAGGGGGGGTCCCCCTGTTTCCACTAAAGTGGTAACGTTCGTTGCCTATCCTTTCGGAGTCGTTCCAATTT-TACATCTTTGGCTTGATGTCATCAGTGATTAGGACGGGCTCACTGGAAGCCAGATGGAGTCACGC-ACGTCTCCACAG-----AGCGGTTATGAGGTTTTGTCAGCTAGCACCAGTTCGAGATACTCAGCTGCAACAGTCTTACCTTGCGAGTTTTTAATTCGCTCATATT-CTCTACGCTCGCCAGTTGTCAGCTTGGCGAGCTTTTCTGACTGTGCACTGAGTTTCTTTAAAGAGCCACTAGTGAGAGTGGAAGCTGAGGAGAGAACTCCCCATTTCTTCCTGCTATCCATCACTAACTCTTCTCTTCGCCTGA…	1530	5682	KR231962.1 Cucurbit aphid-borne yellows virus isolate SW25, complete genome
TRINITY_DN1185_c0_g2_i1	KY617826.1	83.333	1536	249	5	1	1530	5670	4136	0	1600	KY617826.1	1774	1280	1280	7	83.33	1	-1	CACCGAAACGCCAGGGGGAATC-CCCCTGTTTCCACATGAGTGGGAA-CGTTCGTTGCCTATCCTTTCGGAGTCGTT-AACGTTTATACTCTCGTTCTTGAGTTTCCGGATTGAGCTTCGCCGCGTATTCCGGTGCCGCGCTACTTTAGGGTAGTAGGAACCCTTTAGGAGGTTTTATCAGCTAGCACTTTTTCGAGGTACTCGGCTGCGACAGTCGAACCCATTGAATTTTTAAGTCGTTGATATTGCACTCGCTCACCAGTTGTTAACATGGCGAGTTTTTCTGACTGTGCGCTAAGCTTCTTCAATGCTCCGCCAGTAAGAGAGGAAGTTGAGGAAAGAAATCCCCATTTCTTCCTGCTATCCATTACTTTTGCTTCTCTACGCTCGAGCATATCT…	CACCGAA-CGGCTGGGGAGGTCTCCCCTGTTTTCACCAAAGTGAGAAACGTTCGCTGCCTATCCTTTCGGAGTCGTTCAACGTTTATACTCGCGTTCTTGAGTTTCCGGATTGAGCTTCGCCGCGTATTCCGGTGCCGCGCTACTTCAGAGTAGTAGGAACTCATTGAGAGGTTTTGTCAGCAAGCACCATTTCAAGAAACTCAGCTGCTACAGTCTTACCGTGCGAATTTTTGATTCGCTCATACTCTCGACGCTCGCCAGATGTTAACTGAGCGAGTTTTTCCGACTGTGCGCTAAGTTTCTTTAGGGCTCCACTGGTGAGAGAGGAAGAAGAGGACAGAATTCCCCATTTCTTCCTACTATCCATCACCTTTTCTTCTCTTCGTTGAAGCATTTCA…	1530	5677	KY617826.1 Cucurbit aphid-borne yellows virus, partial genome
TRINITY_DN1185_c0_g2_i1	KR231948.1	83.495	1545	232	13	1	1530	5682	4146	0	1599	KR231948.1	1772	1290	1290	23	83.5	1	-1	CACCGAAACGCCAGGGGGAATCCCCC-TGTTTCCACATGAGTGGGAACGTTCGTTGCCTATCCTTTCGGAGTCGTTAACGTTTATAC-TCTCGTTCTTGAGTT--TCCG-GATTGAGCTTCGC-CGC-GTATTCC----GGTGCCGCGCTACTTTAGGGTAGTAGGAACCCTTTAGGAGGTTTTATCAGCTAGCACTTTTTCGAGGTACTCGGCTGCGACAGTCGAACCCATTGAATTTTTAAGTCGTTGATATTGCACT-CGCTCACCAGTTGTTAACATGGCGAGTTTTTCTGACTGTGCGCTAAGCTTCTTCAATGCTCCGCCAGTAAGAGAGGAAGTTGAGGAAAGAAATCCCCATTTCTTCCTGCTATCCATTACTTTTGCTTCTCTACGCTCG…	CACCGAAACGCCAGGGGGGGTCCCCCCTGTTTCCACTAAAGTGGTAACGTTCGTTGCCTATCCTTTCGGAGTCGTTCCAATTT-TACATCTTTGGCTTGATGTCATCAGTGATTAGGACGGGCTCACTGGAAGCCAGATGGAGTCACGC-ACGTCTCCACAG-----AGCGGTTATGAGGTTTTGTCAGCTAGCACCAGTTCGAGATACTCGGCTGCAACAGTCTTACCTTGCGAGTTTTTAATTCGCTCATATT-CTCTACGCTCGCCAGTTGTCAACTTGGCGAGCTTTTCTGACTGTGCGCTGAGTTTCTTTAAAGAGCCACTAGTGAGAGTGGAAGCTGAGGAGAGAACTCCCCATTTCTTCCTGCTATCCATCACTGACTCTTCTCTTCGCCTG…	1530	5683	KR231948.1 Cucurbit aphid-borne yellows virus isolate GS2, complete genome
TRINITY_DN1185_c0_g2_i1	KR231954.1	83.495	1545	232	13	1	1530	5682	4146	0	1599	KR231954.1	1772	1290	1290	23	83.5	1	-1	CACCGAAACGCCAGGGGGAATCCCCC-TGTTTCCACATGAGTGGGAACGTTCGTTGCCTATCCTTTCGGAGTCGTTAACGTTTATAC-TCTCGTTCTTGAGTT--TCCG-GATTGAGCTTCGC-CGC-GTATTCC----GGTGCCGCGCTACTTTAGGGTAGTAGGAACCCTTTAGGAGGTTTTATCAGCTAGCACTTTTTCGAGGTACTCGGCTGCGACAGTCGAACCCATTGAATTTTTAAGTCGTTGATATTGCACT-CGCTCACCAGTTGTTAACATGGCGAGTTTTTCTGACTGTGCGCTAAGCTTCTTCAATGCTCCGCCAGTAAGAGAGGAAGTTGAGGAAAGAAATCCCCATTTCTTCCTGCTATCCATTACTTTTGCTTCTCTACGCTCG…	CACCGAAACGCCAGGGGGGGTCCCCCCTGTTTCCACTAAAGTGGTAACGTTCGTTGCCTATCCTTTCGGAGTCGTTCCAATTT-TACATCTTTGGCTTGATGTCATCAGTGATTAGGACGGGCTCACTGGAAGCCAGATGGAGTCACGC-ACGTCTCCACAG-----AGCGGTTATGAGGTTTTGTCAGCTAGCACCAGTTCGAGATACTCGGCTGCAACAGTCTTACCTTGCGAGTTTTTAATTCGCTCATATT-CTCTACGCTCGCCAGTTGTCAACTTGGCGAGCTTTTCTGACTGTGCACTGAGTTTCTTTAAAGAGCCACTAGTGAGAGTGGAAGCTGAGGAGAGAACTCCCCATTTCTTCCTGCTATCCATCACTGACTCTTCTCTTCGCCTT…	1530	5683	KR231954.1 Cucurbit aphid-borne yellows virus isolate NW1, complete genome
TRINITY_DN1185_c0_g2_i1	KR231958.1	83.495	1545	232	13	1	1530	5682	4146	0	1599	KR231958.1	1772	1290	1290	23	83.5	1	-1	CACCGAAACGCCAGGGGGAATCCCCC-TGTTTCCACATGAGTGGGAACGTTCGTTGCCTATCCTTTCGGAGTCGTTAACGTTTATAC-TCTCGTTCTTGAGTT--TCCG-GATTGAGCTTCGC-CGC-GTATTCC----GGTGCCGCGCTACTTTAGGGTAGTAGGAACCCTTTAGGAGGTTTTATCAGCTAGCACTTTTTCGAGGTACTCGGCTGCGACAGTCGAACCCATTGAATTTTTAAGTCGTTGATATTGCACT-CGCTCACCAGTTGTTAACATGGCGAGTTTTTCTGACTGTGCGCTAAGCTTCTTCAATGCTCCGCCAGTAAGAGAGGAAGTTGAGGAAAGAAATCCCCATTTCTTCCTGCTATCCATTACTTTTGCTTCTCTACGCTCG…	CACCGAAACGCCAGGGGGGGTCCCCCCTGTTTCCACTAAAGTGGTAACGTTCGTTGCCTATCCTTTCGGAGTCGTTCCAATTT-TACATCTTTGGCTTGATGTCATCAGTGATTAGGACGGGCTCACTGGAAGCCAGATGGAGTCACGC-ACGTCTCCACAG-----AGCGGTTATGAGGTTTTGTCAGCTAGCACCAGTTCGAGATACTCGGCTGCAACAGTCTTACCTTGCGAGTTTTTAATTCGCTCATATT-CTCTACGCTCGCCAGTTGTCAACTTGGCGAGCTTTTCTGACTGTGCACTGAGTTTCTTTAAAGAGCCACTAGTGAGAGTGGAAGCTGAGGAGAGAACTCCCCATTTCTTCCTGCTATCCATCACTGACTCTTCTCTTCGCCTT…	1530	5683	KR231958.1 Cucurbit aphid-borne yellows virus isolate NW18, complete genome
TRINITY_DN1185_c0_g2_i1	KR231944.1	83.376	1546	233	13	1	1530	5683	4146	0	1593	KR231944.1	1766	1289	1289	24	83.38	1	-1	CACCGAAACGCCAGGGGGAAT--CCCCCTGTTTCCACATGAGTGGGAACGTTCGTTGCCTATCCTTTCGGAGTCGTTAACGTTTATAC-TCTCGTTCTTGAGTT--TCCG-GATTGAGCTTCGC-CGC-GTATTCC----GGTGCCGCGCTACTTTAGGGTAGTAGGAACCCTTTAGGAGGTTTTATCAGCTAGCACTTTTTCGAGGTACTCGGCTGCGACAGTCGAACCCATTGAATTTTTAAGTCGTTGATATTGCACT-CGCTCACCAGTTGTTAACATGGCGAGTTTTTCTGACTGTGCGCTAAGCTTCTTCAATGCTCCGCCAGTAAGAGAGGAAGTTGAGGAAAGAAATCCCCATTTCTTCCTGCTATCCATTACTTTTGCTTCTCTACGCTC…	CACCGAAACGCCAGGGGGGGTTCCCCCCTGTTTCCACTAAAGTGGTAACGTTCGTTGCCTATCCTTTCGGAGTCGTTCCAATTT-TACATCTTTGGCTTGATGTCATCAGTGATTAGGACGGGCTCACTGGAAGCCAGATGGAGTCACGC-ACGTCTCCACAG-----AGCGGTTATGAGGTTTTGTCAGCTAGCACCAGTTCGAGATACTCGGCTGCAACAGTCTTACCTTGCGAGTTTTTGATTCGCTCATATT-CTCTACGCTCGCCAGTTGTCAACTTGGCGAGCTTTTCTGATTGTGCACTGAGTTTCTTTAAAGAGCCAACAGTGAGAGTGGAAGCTGAGGAGAGAACTCCCCATTTCTTCCTGCTATCCATCACTGACTCTTCTCTTCGCCT…	1530	5684	KR231944.1 Cucurbit aphid-borne yellows virus isolate CY6, complete genome
TRINITY_DN1185_c0_g2_i1	KR231942.1	83.366	1545	234	13	1	1530	5682	4146	0	1590	KR231942.1	1762	1288	1288	23	83.37	1	-1	CACCGAAACGCCAGGGGGAATCCCCC-TGTTTCCACATGAGTGGGAACGTTCGTTGCCTATCCTTTCGGAGTCGTTAACGTTTATAC-TCTCGTTCTTGAGTT--TCCG-GATTGAGCTTCGC-CGC-GTATTCC----GGTGCCGCGCTACTTTAGGGTAGTAGGAACCCTTTAGGAGGTTTTATCAGCTAGCACTTTTTCGAGGTACTCGGCTGCGACAGTCGAACCCATTGAATTTTTAAGTCGTTGATATTGCACT-CGCTCACCAGTTGTTAACATGGCGAGTTTTTCTGACTGTGCGCTAAGCTTCTTCAATGCTCCGCCAGTAAGAGAGGAAGTTGAGGAAAGAAATCCCCATTTCTTCCTGCTATCCATTACTTTTGCTTCTCTACGCTCG…	CACCGAAACGCCGGGGGGGGTCCCCCCTGTTTCCACTAAAGTGGTAACGTTCGTTGCCTATCCTTTCGGAGTCGTTCCAATTT-TACATCTTTGGCTTGATGTCATCAGTGATTAGGACGGGCTCACTGGAAGCCAGATGGAGTCACGC-ACGTCTCCACAG-----AGCGGTTATGAGGTTTTGTCAGCTAGCACCAGTTCGAGATACTCGGCTGCAACAGTCTTACCTTGCGAGTTTTTAATTCGCTCATATT-CTCTACGCTCGCCAGTTGTCAACTTGGCGAGCTTTTCAGACTGTGCACTGAGTTTCTTTAAAGAGCCACTAGTGAGAGTGGAAGCTGAGGAGAGAACTCCCCATTTCTTCCTGCTATCCATCACTGACTCTTCTCTTCGCCTT…	1530	5683	KR231942.1 Cucurbit aphid-borne yellows virus isolate CY3, complete genome
TRINITY_DN1185_c0_g2_i1	KR231945.1	83.366	1545	234	13	1	1530	5682	4146	0	1590	KR231945.1	1762	1288	1288	23	83.37	1	-1	CACCGAAACGCCAGGGGGAATCCCCC-TGTTTCCACATGAGTGGGAACGTTCGTTGCCTATCCTTTCGGAGTCGTTAACGTTTATAC-TCTCGTTCTTGAGTT--TCCG-GATTGAGCTTCGC-CGC-GTATTCC----GGTGCCGCGCTACTTTAGGGTAGTAGGAACCCTTTAGGAGGTTTTATCAGCTAGCACTTTTTCGAGGTACTCGGCTGCGACAGTCGAACCCATTGAATTTTTAAGTCGTTGATATTGCACT-CGCTCACCAGTTGTTAACATGGCGAGTTTTTCTGACTGTGCGCTAAGCTTCTTCAATGCTCCGCCAGTAAGAGAGGAAGTTGAGGAAAGAAATCCCCATTTCTTCCTGCTATCCATTACTTTTGCTTCTCTACGCTCG…	CACCGAAACGCCAGGGGGGGTCCCCCCTGTTTCCACTAAAGTGGTAACGTTCGTTGCCTATCCTTTCGGAGTCGTTCCAATTT-TACATCTTTGGCTTGATGTCATCAGTGATTAGGACGGGCTCACTGGAAGCCAGATGGAGTCACGC-ACGTCTCCACAG-----AGCGGTTATGAGGTTTTGTCAGCTAGCACCAGTTCGAGATACTCGGCTGCAACAGTCTTACCTTGCGAGTTTTTAATTCGCTCATATT-CTCTACGCTCGCCAGTTGTCAACTTGGCGAGCTTTTCTGACTGTGCACTGAGTTTCTTTAAAGAGCCACTAGTGAGAGTGGAAGCTGAGGAGAGAACTCCCCATTTCTTCCTGCTATCCATCACTGACTCTTCTCTTCGCCTT…	1530	5683	KR231945.1 Cucurbit aphid-borne yellows virus isolate GM7, complete genome
TRINITY_DN1185_c0_g2_i1	KR231956.1	83.366	1545	234	13	1	1530	5682	4146	0	1590	KR231956.1	1762	1288	1288	23	83.37	1	-1	CACCGAAACGCCAGGGGGAATCCCCC-TGTTTCCACATGAGTGGGAACGTTCGTTGCCTATCCTTTCGGAGTCGTTAACGTTTATAC-TCTCGTTCTTGAGTT--TCCG-GATTGAGCTTCGC-CGC-GTATTCC----GGTGCCGCGCTACTTTAGGGTAGTAGGAACCCTTTAGGAGGTTTTATCAGCTAGCACTTTTTCGAGGTACTCGGCTGCGACAGTCGAACCCATTGAATTTTTAAGTCGTTGATATTGCACT-CGCTCACCAGTTGTTAACATGGCGAGTTTTTCTGACTGTGCGCTAAGCTTCTTCAATGCTCCGCCAGTAAGAGAGGAAGTTGAGGAAAGAAATCCCCATTTCTTCCTGCTATCCATTACTTTTGCTTCTCTACGCTCG…	CACCGAAACGCCAGGGGGGGTCCCCCCTGTTTCCACTAAAGTGGTAACGTTCGTTGCCTATCCTTTCGGAGTCGTTCCAATTT-TACATCTTTGGCTTGATGTCATCAGTGATTAGGACGGGCTCACTGGAAGCCAGATGGAGTCACGC-ACGTCTCCACAG-----AGCGGTTATGAGGTTTTGTCAGCTAGCACCAGTTCGAGATACTCGGCTGCAACAGTCTTACCTTGCGAGTTTTTAATTCGCTCATATT-CTCTACGCTCGCCAGTTGTCAACTTGGCGAGCTTTTCTGACTGTGCGCTGAGTTTCTTTAAAGAGCCACTAGTGAGAGTGGAAGCTGAGGAGAGAACTCCCCATTTCTTCCTGCTATCCATCACTGACTCTTCTCTTCGCCTG…	1530	5683	KR231956.1 Cucurbit aphid-borne yellows virus isolate NW2(14), complete genome
TRINITY_DN1185_c0_g2_i1	KR231946.1	83.312	1546	234	13	1	1530	5680	4143	0	1588	KR231946.1	1760	1288	1288	24	83.31	1	-1	CACCGAAACGCCAGGGGGAAT--CCCCCTGTTTCCACATGAGTGGGAACGTTCGTTGCCTATCCTTTCGGAGTCGTTAACGTTTATAC-TCTCGTTCTTGAGTT--TCCG-GATTGAGCTTCGC-CGC-GTATTCC----GGTGCCGCGCTACTTTAGGGTAGTAGGAACCCTTTAGGAGGTTTTATCAGCTAGCACTTTTTCGAGGTACTCGGCTGCGACAGTCGAACCCATTGAATTTTTAAGTCGTTGATATTGCACT-CGCTCACCAGTTGTTAACATGGCGAGTTTTTCTGACTGTGCGCTAAGCTTCTTCAATGCTCCGCCAGTAAGAGAGGAAGTTGAGGAAAGAAATCCCCATTTCTTCCTGCTATCCATTACTTTTGCTTCTCTACGCTC…	CACCGAAACGCCAGGGGGGGGTCCCCCCTGTTTCCACTAAAGTGGTAACGTTCGTTGCCTATCCTTTCGGAGTCGTTCCAATTT-TACATCTTTGGCTTGATGTCATCAGTGATTAGGACGGGCTCACTGGAAGCCAGATGGAGTCACGC-ACGTCTCCACAG-----AGCGGTTATGAGGTTTTGTCAGCTAGCACCAGTTCGAGATACTCGGCTGCAACAGTCTTGCCTTGCGAGTTTTTAATTCGCTCATATT-CTCTACGCTCGCCAGTTGTCAACTTGGCGAGCTTTTCTGACTGTGCACTGAGTTTCTTTAAAGAGCCACTAGTGAGAGTGGAAGCTGAGGAGAGAACTCCCCATTTCTTCCTGCTATCCATCACTGACTCTTCTCTTCGCCT…	1530	5681	KR231946.1 Cucurbit aphid-borne yellows virus isolate GM16, complete genome
TRINITY_DN1185_c0_g2_i1	KR231957.1	83.301	1545	235	13	1	1530	5682	4146	0	1586	KR231957.1	1758	1287	1287	23	83.3	1	-1	CACCGAAACGCCAGGGGGAATCCCCC-TGTTTCCACATGAGTGGGAACGTTCGTTGCCTATCCTTTCGGAGTCGTTAACGTTTATAC-TCTCGTTCTTGAGTT--TCCG-GATTGAGCTTCGC-CGC-GTATTCC----GGTGCCGCGCTACTTTAGGGTAGTAGGAACCCTTTAGGAGGTTTTATCAGCTAGCACTTTTTCGAGGTACTCGGCTGCGACAGTCGAACCCATTGAATTTTTAAGTCGTTGATATTGCACT-CGCTCACCAGTTGTTAACATGGCGAGTTTTTCTGACTGTGCGCTAAGCTTCTTCAATGCTCCGCCAGTAAGAGAGGAAGTTGAGGAAAGAAATCCCCATTTCTTCCTGCTATCCATTACTTTTGCTTCTCTACGCTCG…	CACCGAAACGCCAGGGGGGGTCCCCCCTGTTTCCACTAGAGTGGTAACGTTCGTTGCCTATCCTTTCGGAGTCGTTCCAATTT-TACATCTTTGGCTTGATGTCATCAGTGATTAGGACGGGCTCACTGGAAGCCAGATGGAGTCACGC-ACGTCTCCACAG-----AGCGGTTATGAGGTTTTGTCAGCTAGCACCAGTTCGAGATACTCGGCTGCAACAGTCTTACCTTGCGAGTTTTTAATTCGCTCATATT-CTCTACGCTCGCCAGTTGTCAACTTGGCGAGCTTTTCTGACTGTGCACTGAGTTTCTTTAAAGAGCCACTAGTGAGAGTGGAAGCTGAGGAGGGAACTCCCCATTTCTTTCTGCTATCCATCACTGACTCTTCTCTTCGCCTG…	1530	5683	KR231957.1 Cucurbit aphid-borne yellows virus isolate NW5, complete genome
TRINITY_DN1185_c0_g2_i1	JQ700306.1	82.073	1534	254	11	1	1523	5678	4155	0	1496	JQ700306.1	1658	1259	1259	21	82.07	1	-1	CACCGAAACGCCAGGGGGAATCCCCCTGTTTCCACATGAGTGGGAACGTTCGTTGCCTATCCTTTCGGAGTCGTTAACGTTTATAC-TCTCGTTCTTGA-GTTTCCGGATTGAGCTTCGCCGCGTATTCCGGTGCCGCGCT--ACTTTAGGGTAGT----AGGAACCCTTTAGGAGGTTTTATCAGCTAGCACTTTTTCGAGGTACTCGGCTGCGACAGTCGAACCCATTGAATTTTTAAGTCGTTGATATTGCACTCGCTCACCAGTTGTTAACATGGCGAGTTTTTCTGACTGTGCGCTAAGCTTCTTCAATGCTCCGCCAGTAAGAGAGGAAGTTGAGGAAAGAAATCCCCATTTCTTCCTGCTATCCATTACTTTTGCTTCTCTACGCTCGAGCA…	CACCGGAATGCCAGGGGGAGTCCCCCTGTGCTCACAGAAGTGAGAACATCCGTTGCCTATCCTTACGGAGTCGTTCCAATTT-TACATCTTTGGCTTGATGTTTCCC-AGTGAT-TTGGTCGGGTTCACTGGAGACCGGGTGGAGTCTCGCGC-GTCTCCACAAAGCGATTACGAGGTTTTGTCAGCTAGCACCACTTCGAGATACTCAGCAGCAGCAGTCCTGCCTAGTGAATTCTTGATTCGTTCGAATTCCGCGCGCTCACCAGTTGTTAACTTGGCGAGCTTCTCTGACTGCGCGCTGAGCTTCTTTAAGGAACCGCTAGTGAGGGAAGAAGCTGAGGAAAGAATTCCCCATTTCTTCCTGCTTTCCATCACTTTCTCGTCCCTTCGTCTGAGCA…	1530	5679	JQ700306.1 Cucurbit aphid-borne yellows virus isolate CABYV-R-TW82, complete genome
TRINITY_DN1185_c0_g2_i1	JQ700305.1	78.985	1537	292	13	1	1523	5669	4150	0	1285	JQ700305.1	1424	1214	1214	31	78.99	1	-1	CACCGAAACGCCAGGGGGAATCCCCCTGTTTCCACATGAGTGGGAACGTTCGTTGCCTATCCTTTCGGAGTCGTTAACGTTTATAC-TCTCGTTCTTGAGTTTCC----GGATTGAGCTTCGCCGC--GTATTCCGGTGCCG---CGCTACTTTAGGGTAGTAGGAACCCTTTAGGAGGTTTTATCAGCTAGCACTTTTTCGAGGTACTCGGCTGCGACAGTCGAACCCATTGAATTTTTAAGTCGTTGATATTGCACT-CGCTCACCAGTTGTTAACATGGCGAGTTTTTCTGACTGTGCGCTAAGCTTCTTCAATGCTCCGCCAGTAAGAGAGGAAGTTGAGGAAAGAAATCCCCATTTCTTCCTGCTATCCATTACTTTTGCTTCTCTACGCTCGA…	CACCGAAACGCCAGGGGGAAAACCCCTGTTTCCACCATAGTGAGAACGTTCGTTGCCTATCCTTTCGGAGTCGTTCCAATTT-TACATCTTTGGCTTGATGTTCCCAGTGGTTTGGACAGGCCCACTGGAAGCCGGGTGGAGTCTCGCTCGTCTCC------ACAAAGCGCTTACGAGGTTTTCTCAGCTAACACCAACTCGAGATATTCAGCTGCTACAGTCTTTCCACTCGAGTTCTTAATGCGTTCGTATT-CTCTACGTTCGCCGGTCGTAAGCTTTGCGAGTTTCTCAGACTGGGCGCTCACCTTAAG-AGTGC--CGCCTGTTAAGGAGGAGACCGTTGAAAGCGGTCCCCATTTCTTTCTGCTATCCATGACGGCATCATCTCTTCTCTTAA…	1530	5670	JQ700305.1 Cucurbit aphid-borne yellows virus isolate CABYV-C-TW20, complete genome
TRINITY_DN1185_c0_g2_i1	KP326573.1	80.88	659	126	0	814	1472	5001	4343	8.2e-177	621	KP326573.1	688	533	533	0	80.88	1	-1	GACCACGTCATTGCCCCCTTGCGTGGTATTCTTCTTGGCTCGTTCCCATTATTATCTTCGTCGATTGATACCGAGATTGCCCCCCACTCGCAATATTTCTCCGTGTAATTCCCGTATGAAACGGTGTAATTATATGAAGAATCCTTCTGTATAGGGGGGGGGTATATAGCCCAGCTTCCTTCCTCATCATCACATTCTAATTCGAAGGAAGCGGACCAATCGACTTCAACGGCCCGCGCAGTGTCAAAACTTTTACCATTCATTGTTGCGTCGGGATGTCCTGCCACAAAAGCTGTGTTAGATTGGTAATTTGTGATTTTACAGCCTTTGTAATTTCCTATATTCCAACCTCTTTGAGAAACATCGTAAGCGATATTTCCAAGCCAACTACCATCCAGT…	GACCACGCCATTTCCCCCTTGCGCGGTATTCTTCTTGCTGCATACCCCTCATTATCTTCATCAATAGAAACAGAAATGGCTCCCCACTCACAATACTTCTCCGTATAATTTCCGTAGGACACGGTGTAATTATAAGAGGCATCTTTCTGGATCGGGGGGGGATAAATCATCCAGCTTCCTTCTTCATCATCACATTCAAGTTCAAAGGAAGCGAACCAATCAACTTCTACTGCCCGGGCATTGTCGAAAGTTTTACCATTCATCTTTGCATCCGGGTGCCCCGCTACAAAAGTTGTGTTGGTTTGAAAATTTTTAATCTTGCAACCTTTGTAATTCCCCACTGTCCAACCGCGTTGAGAGACATCATAGGCAATGTTGCCAAGCCAACTACCATCCAAA…	1530	6244	KP326573.1 Pepper vein yellows virus isolate HN, complete genome
TRINITY_DN1185_c0_g2_i1	KP300822.1	80.121	659	131	0	814	1472	5001	4343	9.36e-170	598	KP300822.1	662	528	528	0	80.12	1	-1	GACCACGTCATTGCCCCCTTGCGTGGTATTCTTCTTGGCTCGTTCCCATTATTATCTTCGTCGATTGATACCGAGATTGCCCCCCACTCGCAATATTTCTCCGTGTAATTCCCGTATGAAACGGTGTAATTATATGAAGAATCCTTCTGTATAGGGGGGGGGTATATAGCCCAGCTTCCTTCCTCATCATCACATTCTAATTCGAAGGAAGCGGACCAATCGACTTCAACGGCCCGCGCAGTGTCAAAACTTTTACCATTCATTGTTGCGTCGGGATGTCCTGCCACAAAAGCTGTGTTAGATTGGTAATTTGTGATTTTACAGCCTTTGTAATTTCCTATATTCCAACCTCTTTGAGAAACATCGTAAGCGATATTTCCAAGCCAACTACCATCCAGT…	GACCACACCATTTACACCTTGCGCGGTATTCTTCTTGCTGCATACCCCTCATTATCTTCATCAATAGAAACAGAAATGGCTCCCCACTCACAATACTTCTCTGTATAATTTCCGTAGGACACGGTGTAATTATAAGAGGCATCTTTTTGGATCGGGGGGGGATAAATCATCCAGCTTCCTTCTTCGTCATCACATTCTAGTTCGAAGGAAGCGAACCAATCTACTTCTACTGCCCGGGCATTGTCGAAAGTTTTACCATTCATCTTTGCATCCGGGTGCCCCGCTACAAAAGTTGTGTTGGTTTGAAAATTTTTAATCTTGCAACCTTTGTAATTCCCCACTGTCCAACCGCGTTGAGAGACATCATAGGCAATGTTGCCAAGCCAACTACCATCCAAA…	1530	6244	KP300822.1 UNVERIFIED: Pepper vein yellows virus isolate HN genomic sequence
TRINITY_DN1185_c0_g2_i1	NC_015050.1	79.638	663	135	0	813	1475	5002	4340	1.69e-166	587	NC_015050.1	650	528	528	0	79.64	1	-1	AGACCACGTCATTGCCCCCTTGCGTGGTATTCTTCTTGGCTCGTTCCCATTATTATCTTCGTCGATTGATACCGAGATTGCCCCCCACTCGCAATATTTCTCCGTGTAATTCCCGTATGAAACGGTGTAATTATATGAAGAATCCTTCTGTATAGGGGGGGGGTATATAGCCCAGCTTCCTTCCTCATCATCACATTCTAATTCGAAGGAAGCGGACCAATCGACTTCAACGGCCCGCGCAGTGTCAAAACTTTTACCATTCATTGTTGCGTCGGGATGTCCTGCCACAAAAGCTGTGTTAGATTGGTAATTTGTGATTTTACAGCCTTTGTAATTTCCTATATTCCAACCTCTTTGAGAAACATCGTAAGCGATATTTCCAAGCCAACTACCATCCAG…	AGACCACGCCATTTCCCCCTTGCGCGGAATTCTTCTTGGTGCGTACCCCTCGTTGTCTTCGTCTATAGAGACGGATATGGCTCCCCATTCACAATACTTCTCCGTATAATTCCCGTATGACACGGTGTAGTTATAGGAGGAATCCTTCTGGATCGGCGGGGGATAAATCATCCAGCTTCCTTCTTCATCATCACACTCAAGTTCAAAGGAAGCGAACCAATCAACTTCAACTGCCCGGGCGCTGTCAAAAGCTTTGCCATTCATTTTAGCCTCCGGGTGCCCCGCTACAAAGGTGATATTCGTCTGATAATTCTTTATTTTACACCCTTTGTAATTTCCCACAGTCCAGCCTCTTTGCGAGACATCATAGGCAATATTGCCGAGCCAACTACCATCGAG…	1530	6244	NC_015050.1 Pepper vein yellows virus genomic RNA, complete genome
TRINITY_DN1185_c0_g2_i1	KU999109.1	79.638	663	135	0	813	1475	5001	4339	1.69e-166	587	KU999109.1	650	528	528	0	79.64	1	-1	AGACCACGTCATTGCCCCCTTGCGTGGTATTCTTCTTGGCTCGTTCCCATTATTATCTTCGTCGATTGATACCGAGATTGCCCCCCACTCGCAATATTTCTCCGTGTAATTCCCGTATGAAACGGTGTAATTATATGAAGAATCCTTCTGTATAGGGGGGGGGTATATAGCCCAGCTTCCTTCCTCATCATCACATTCTAATTCGAAGGAAGCGGACCAATCGACTTCAACGGCCCGCGCAGTGTCAAAACTTTTACCATTCATTGTTGCGTCGGGATGTCCTGCCACAAAAGCTGTGTTAGATTGGTAATTTGTGATTTTACAGCCTTTGTAATTTCCTATATTCCAACCTCTTTGAGAAACATCGTAAGCGATATTTCCAAGCCAACTACCATCCAG…	AGACCACGCCATTTCCCCCTTGCGCGGAATTCTTCTTGGTGCGTACCCCTCGTTGTCTTCGTCTATAGAGACGGATATGGCTCCCCATTCACAATACTTCTCCGTATAATTCCCGTATGACACGGTGTAGTTATAGGAGGAATCCTTCTGGATCGGCGGGGGATAAATCATCCAGCTTCCTTCTTCATCATCACACTCAAGTTCAAAGGAAGCGAACCAATCAACTTCAACTGCCCGGGCGCTGTCAAAAGCTTTGCCATTCATTTTAGCCTCCGGGTGCCCCGCTACAAAGGTGATATTCGTCTGATAATTCTTTATTTTACACCCTTTGTAATTTCCCACAGTCCAGCCTCTTTGCGAGACATCATAGGCAATATTGCCGAGCCAACTACCATCGAG…	1530	6244	KU999109.1 Pepper vein yellows virus isolate 12KNX1, complete genome
TRINITY_DN1185_c0_g2_i1	KF359946.1	77.027	666	148	3	814	1475	4973	4309	5.54e-141	502	KF359946.1	556	513	513	5	77.03	1	-1	GACCACGTCATTGCCCCCTTGCGTGGTATTCTTCTTGGCTCGTTCCCATT---ATTATCTTCGTCGATTGATACCGAGATTGCCCCCCACTCGCAATATTTCTCCGTGTAATTCCCGTATGAAACGGTGTAATTATATGAAGAATCCTTCTGTATAGGGGGGGGGTATATA-GCCCAGCTTCCTTCCTCATCATCACATTCTAATTCGAAGGAAGCGGACCAATCGACTTCAACGGCCCGCGCAGTGTCAAAACTTTTACCATTCATTGTTGCGTCGGGATGTCCTGCCACAAAAGCTGTGTTAGATTGGTAATTTGTGATTTTACAGCCTTTGTAATTTCCTATATTCCAACCTCTTTGAGAAACATCGTAAGCGATATTTCCAAGCCAACTACCATC…	GACCACATCATTGCCCCCTTATGTGGTTTAATTCTTGATTTGGTCCCTGTGGAATTGTCTTCATCTATAGAGACCGAGACAGCTCCCCACTCGCAATATTTCTCAGTATACTCACCGTAGGATACAGTGTAGTTATATGAGCTATCTTTTTGTATGGGGGGAGGGTAGATTCGCCAAGCT-CCATCTTCATCGTCACATGTAAGCTCAAAAGAGGCGAACCAATCCACTTCCACTGCGCGTGCAGCATCAAAGTGCTTGCCATTCATTTCCGCGTCCGGGTGTCCAGCCACAAAAACCGTGTTTGACTGGTAGTTGCTAATTTTGCAACCTTTATAGTCTCCAATATTCCAACCTCTTTGGGAAACGTCATAAGCGATATTGCCCAGCCAGTTACCATC…	1530	5866	KF359946.1 Cotton leafroll dwarf virus isolate M3 atypical, complete genome
TRINITY_DN1185_c0_g2_i1	KX588248.1	77.074	663	147	3	814	1472	4969	4308	5.54e-141	502	KX588248.1	556	511	511	5	77.07	1	-1	GACCACGTCATTGCCCCCTTGCGTGGTATTCTTCTTGGCTCGTTCCCATT---ATTATCTTCGTCGATTGATACCGAGATTGCCCCCCACTCGCAATATTTCTCCGTGTAATTCCCGTATGAAACGGTGTAATTATATGAAGAATCCTTCTGTATAGGGGGGGGGTATATA-GCCCAGCTTCCTTCCTCATCATCACATTCTAATTCGAAGGAAGCGGACCAATCGACTTCAACGGCCCGCGCAGTGTCAAAACTTTTACCATTCATTGTTGCGTCGGGATGTCCTGCCACAAAAGCTGTGTTAGATTGGTAATTTGTGATTTTACAGCCTTTGTAATTTCCTATATTCCAACCTCTTTGAGAAACATCGTAAGCGATATTTCCAAGCCAACTACCATC…	GACCACACCATTGCCCCCTTGTGTGGTTTGATTCGTGATTTGGTCCCTGTGGAATTGTCTTCGTCTATAGAGACCGAGACAGCTCCCCACTCGCAATATTTCTCAGTATAATCACCGTATGATACAGTATAATTATACGAGCTGTCTTTTTGTATGGGGGGAGGGTAGATTCGCCAAGCT-CCATCTTCATCATCACATGTAAGCTCGAAAGAGGCGAACCAATCCACTTCCACTGCACGCGCAGCATCAAAGTGCTTGCCATTCATCTCTGCGTCCGGGTGACCAGCCACAAAAACAGTGTTGGACTGGTAGTTGCTGATTTTGCAACCTTTATAATCTCCTATGTTCCAACCTCTTTGGGATACGTCGTAAGCAATATTGCCCAACCAGTTACCATC…	1530	5841	KX588248.1 Cotton leafroll dwarf virus isolate CN-S5, partial genome
TRINITY_DN1185_c0_g2_i1	KX588248.1	73.256	86	23	0	421	506	5476	5391	2.89e-05	51.8	KX588248.1	56	63	63	0	73.26	1	-1	GCGAGTACTGTTGCTGCGGCGACGTCCGCTTTGGAGTATCCAGGTGCTAGATCGGGCCTCCACGCCTCAATCAAATCAGGTTCGGG	GCGAGAATAGTTGCAGCAGCAACATCCTCCTTAGAGTATCCAGGACCTGTCCCTGGCTTCCAAGCCTCAACTAAATCTGGTTCCGG	1530	5841	KX588248.1 Cotton leafroll dwarf virus isolate CN-S5, partial genome
TRINITY_DN1185_c0_g2_i1	NC_014545.1	76.877	666	149	3	814	1475	4972	4308	6.74e-140	499	NC_014545.1	552	512	512	5	76.88	1	-1	GACCACGTCATTGCCCCCTTGCGTGGTATTCTTCTTGGCTCGTTCCCATT---ATTATCTTCGTCGATTGATACCGAGATTGCCCCCCACTCGCAATATTTCTCCGTGTAATTCCCGTATGAAACGGTGTAATTATATGAAGAATCCTTCTGTATAGGGGGGGGGTATATA-GCCCAGCTTCCTTCCTCATCATCACATTCTAATTCGAAGGAAGCGGACCAATCGACTTCAACGGCCCGCGCAGTGTCAAAACTTTTACCATTCATTGTTGCGTCGGGATGTCCTGCCACAAAAGCTGTGTTAGATTGGTAATTTGTGATTTTACAGCCTTTGTAATTTCCTATATTCCAACCTCTTTGAGAAACATCGTAAGCGATATTTCCAAGCCAACTACCATC…	GACCACATCATTACCCCCTTATGTGGTTTAATTCTTGATTTGGTCCCTGTGGAATTGTCTTCGTCTACAGAGACCGAGACAGCTCCCCACTCGCAATATTTCTCAGTATAATCGCCGTAGGATACAGTGTAATTATACGAGCTATCTTTTTGTATGGGGGGAGGGTAGATTCGCCAAGCT-CCATCTTCATCATCACATGTAAGCTCAAAAGAGGCAAACCAATCCACTTCCACTGCGCGTGCAGCATCAAAGTGCTTGCCATCCATTTCCGCGTCCGGGTGTCCAGCCACAAAAACCGCGTTTGACTGGTAGTTGCTAATTCTGCAACCTTTGTAATCTCCAATATTCCAACCTCTCTGGGAAACGTCATAAGCGATATTGCCCAGCCAGTTACCATC…	1530	5866	NC_014545.1 Cotton leafroll dwarf virus, complete genome
TRINITY_DN1185_c0_g2_i1	HQ827780.2	76.969	673	147	6	809	1475	4978	4308	8.22e-139	495	HQ827780.2	548	518	518	8	76.97	1	-1	GGGTA-GACCACGTCATTGCCCCCTTGCGTGGTATTCTTCTTGGCTCGTTCCCATT---ATTATCTTCGTCGATTGATACCGAGATTGCCCCCCACTCGCAATATTTCTCCGTGTAATTCCCGTATGAAACGGTGTAATTATATGAAGAATCCTTCTGTATAGGGGGGGGGTATATA-GCCCAGCTTCCTTCCTCATCATCACATTCTAATTCGAAGGAAGCGGACCAATCGACTTCAACGGCCCGCGCAGTGTCAAAACTTTTACCATTCATTGTTGCGTCGGGATGTCCTGCCACAAAAGCTGTGTTAGATTGGTAATTTGTGATTTTACAGCCTTTGTAATTTCCTATATTCCAACCTCTTTGAGAAACATCGTAAGCGATATTTCCAAGCCAACT…	GGGTATGACCACATCATTACCCCCTTATGTGGTTTAATTCTTGATTTGGTCCCTGTGGAATTGTCTTCGTCTATAGAGACCGAGACAGCTCCCCACTCGCAATATTTCTCAGTATAATCGCCGTAGGATACAGTGTAATTATACGAGCTATCTTTTTGTATGGGGGGAGGGTAGATTCGCCAAGCT-CCATCTTCATCATCACATGTAAGCTCAAAAGAGGCAAACCAATCCACTTCCACTGCGCGTGCAGCATCAAAGTGCTTGCCATTCATTTCCGCGTCCGGGTGTCCAGCCACAAAAACCGTGTTTGACTGGTAGTTGCTAATCCTGCAACCTTTATAGTCTCCAATATTCCAACCTCTCTGGGAAACGTCATAAGCGATATTGCCCAGCCAGTT…	1530	5865	HQ827780.2 Cotton leafroll dwarf virus, complete genome
TRINITY_DN1185_c0_g2_i1	KF906261.1	76.727	666	150	3	814	1475	4972	4308	2.87e-138	493	KF906261.1	546	511	511	5	76.73	1	-1	GACCACGTCATTGCCCCCTTGCGTGGTATTCTTCTTGGCTCGTTCCCATT---ATTATCTTCGTCGATTGATACCGAGATTGCCCCCCACTCGCAATATTTCTCCGTGTAATTCCCGTATGAAACGGTGTAATTATATGAAGAATCCTTCTGTATAGGGGGGGGGTATATA-GCCCAGCTTCCTTCCTCATCATCACATTCTAATTCGAAGGAAGCGGACCAATCGACTTCAACGGCCCGCGCAGTGTCAAAACTTTTACCATTCATTGTTGCGTCGGGATGTCCTGCCACAAAAGCTGTGTTAGATTGGTAATTTGTGATTTTACAGCCTTTGTAATTTCCTATATTCCAACCTCTTTGAGAAACATCGTAAGCGATATTTCCAAGCCAACTACCATC…	GACCACATCATTGCCCCCTTATGTGGTTTAATTCTTGATTTGGTCCCTGTGGAATTGTCTTCGTCTATAGAGACTGAGACAGCTCCCCACTCGCAATATTTCTCAGTATACTCACCGTAGGATACAGTGTAGTTATACGAGCTATCTTTTTGTATGGGGGGAGGGTAGATTCGCCAAGCT-CCATCTTCATCATCACATGTAAGCTCGAAAGAGGCAAACCAATCTACTTCCACTGCGCGTGCAGCATCAAAGTGCTTGCCATTCATTTCCGCGTCCGGGTGTCCAGCCACAAAAACCGTGTTTGACTGGTAGTTGCTAATCCTGCAACCTTTATAGTCTCCAATATTCCAACCTCTTTGGGAAACGTCATAAGCGATATTGCCCAGCCAGTTACCATC…	1530	5865	KF906261.1 Cotton atypical red leaf virus isolate DeltaOpal, complete genome
TRINITY_DN1185_c0_g2_i1	NC_018571.2	76.065	681	157	2	801	1475	5009	4329	3.49e-137	489	NC_018571.2	542	518	518	6	76.06	1	-1	TGGTTCAGGGGTAGACCACGTCATTGCCCCCTTGCGTGGTATTCTTCT---TGGCTCGTTCCCATTA---TTATCTTCGTCGATTGATACCGAGATTGCCCCCCACTCGCAATATTTCTCCGTGTAATTCCCGTATGAAACGGTGTAATTATATGAAGAATCCTTCTGTATAGGGGGGGGGTATATAGCCCAGCTTCCTTCCTCATCATCACATTCTAATTCGAAGGAAGCGGACCAATCGACTTCAACGGCCCGCGCAGTGTCAAAACTTTTACCATTCATTGTTGCGTCGGGATGTCCTGCCACAAAAGCTGTGTTAGATTGGTAATTTGTGATTTTACAGCCTTTGTAATTTCCTATATTCCAACCTCTTTGAGAAACATCGTAAGCGATATTTCC…	TGGCTCGGGCATTGACCACGTCATAACCCCCTTACGTGGCTTTATACTCTGTGGTGCCCTCCCTGTAGGGTTGTCCTCATCGATGGAAATTGAAACAGCTCCCCATTCGCAGTATTTATCAGTATAATTACCGTATGAAACGGTGTAATTATACGAACTGTCTTTTTGGATGGGGGGGGGATAAATCCGCCAGCTGCCTCCATCATCATCACATTCTAATTCAAATGAGGCATACCAATCTACTTCCACTGCCCGCGCTTTGTCAAATTGTTTGCCATTCATAGTCGCGTCGGGGTGGCCAGCAACAAAGGATGTGTTTGATTGATAATTCTTGATATTGCATCCTTTGTGATTACCAACATTCCAACCTCGCTGGGACACATCATAAGCTATATTTCC…	1530	5843	NC_018571.2 Suakwa aphid-borne yellows virus isolate SABYV-TW19, complete genome
TRINITY_DN1185_c0_g2_i1	KF906260.1	76.426	666	152	3	814	1475	4972	4308	1.49e-135	484	KF906260.1	536	509	509	5	76.43	1	-1	GACCACGTCATTGCCCCCTTGCGTGGTATTCTTCTTGGCTCGTTCCCATT---ATTATCTTCGTCGATTGATACCGAGATTGCCCCCCACTCGCAATATTTCTCCGTGTAATTCCCGTATGAAACGGTGTAATTATATGAAGAATCCTTCTGTATAGGGGGGGGGTATATA-GCCCAGCTTCCTTCCTCATCATCACATTCTAATTCGAAGGAAGCGGACCAATCGACTTCAACGGCCCGCGCAGTGTCAAAACTTTTACCATTCATTGTTGCGTCGGGATGTCCTGCCACAAAAGCTGTGTTAGATTGGTAATTTGTGATTTTACAGCCTTTGTAATTTCCTATATTCCAACCTCTTTGAGAAACATCGTAAGCGATATTTCCAAGCCAACTACCATC…	GACCACATCATTGCCCCCTTATGTGGTTTAATTCTTGATTTGGTCCCTGTGGAATTGTCTTCGTCTATAGAGACTGAGACAGCTCCCCACTCGCAATATTTCTCAGTATACTCACCGTAGGATACAGTGTAGTTATACGAGCTATCTTTTTGTATGGGGGGAGGGTAGATTCGCCAAGCT-CCATCTTCATCATCACATGTAAGCTCAAAAGAGGCAAACCAATCTACTTCCACTGCGCGTGCAGCATCAAAGTGCTTGCCATTCATTTCCGCGTCCGGGTGTCCAGCCACAAAAACCGTGTTTGACTGGTAGTTGCTAATCCTGCAACCTTTATAGTCTCCAATGTTCCAACCTCTTTGGGAAACGTCATAAGCGATATTGCCCAGCCAGTTACCATC…	1530	5865	KF906260.1 Cotton atypical red leaf virus isolate IAC25RMD, complete genome
TRINITY_DN1185_c0_g2_i1	KF359947.1	76.426	666	152	3	814	1475	4973	4309	1.49e-135	484	KF359947.1	536	509	509	5	76.43	1	-1	GACCACGTCATTGCCCCCTTGCGTGGTATTCTTCTTGGCTCGTTCCCATT---ATTATCTTCGTCGATTGATACCGAGATTGCCCCCCACTCGCAATATTTCTCCGTGTAATTCCCGTATGAAACGGTGTAATTATATGAAGAATCCTTCTGTATAGGGGGGGGGTATATA-GCCCAGCTTCCTTCCTCATCATCACATTCTAATTCGAAGGAAGCGGACCAATCGACTTCAACGGCCCGCGCAGTGTCAAAACTTTTACCATTCATTGTTGCGTCGGGATGTCCTGCCACAAAAGCTGTGTTAGATTGGTAATTTGTGATTTTACAGCCTTTGTAATTTCCTATATTCCAACCTCTTTGAGAAACATCGTAAGCGATATTTCCAAGCCAACTACCATC…	GACCACATCATTGCCCCCTTATGTGGTTTAATTCTTGATTTGGTCCCTGTGGAATTGTCTTCATCTATAGAGACCGAGACAGCTCCCCACTCGCAATATTTCTCAGTATACTCACCGTAGGATACAGTGTAGTTATACGAGCTATCTTTTTGTATGGGGGGAGGGTAGATTCGCCAAGCT-CCATCTTCATCGTCACATGTAAGCTCAAAAGAGGCGAACCAATCCACTTCCACTGCGCGTGCAGCATCAAAGTGCTTGCCATTCATTTCCGCGTCCGGGTGTCCAGCCACAAAGACCGTGTTTGACTGGTAGTTGCTAATTTTGCAACCTTTATAGTCTCCAATATTCCAACCTCTTTGGGAAACGTCATAAGCGATATTGCCCAGCCAGTTACCATC…	1530	5866	KF359947.1 Cotton leafroll dwarf virus isolate M5 atypical, complete genome
TRINITY_DN1185_c0_g2_i1	KX122023.1	75.934	669	155	2	813	1475	4998	4330	2.2e-133	477	KX122023.1	528	508	508	6	75.93	1	-1	AGACCACGTCATTGCCCCCTTGCGTGGTATTCTTCT---TGGCTCGTTCCCATTA---TTATCTTCGTCGATTGATACCGAGATTGCCCCCCACTCGCAATATTTCTCCGTGTAATTCCCGTATGAAACGGTGTAATTATATGAAGAATCCTTCTGTATAGGGGGGGGGTATATAGCCCAGCTTCCTTCCTCATCATCACATTCTAATTCGAAGGAAGCGGACCAATCGACTTCAACGGCCCGCGCAGTGTCAAAACTTTTACCATTCATTGTTGCGTCGGGATGTCCTGCCACAAAAGCTGTGTTAGATTGGTAATTTGTGATTTTACAGCCTTTGTAATTTCCTATATTCCAACCTCTTTGAGAAACATCGTAAGCGATATTTCCAAGCCAACTACC…	AGACCACGTCATAACCCCCTTACGTGGTTTAATACTCTGTGGTGCCCTCCCTGTAGGGTTGTCCTCGTCAATGGAAATGGAAACAGCTCCCCACTCGCAGTATTTATCTGTATAATTTCCGTACGAAACGGTGTAATTATACGAACTGTCTTTTTGAATGGGGGGGGGATAAATCCGCCAGCTGCCTCCATCTTCATTACATTCTAATTCAAAAGAGGCATACCAATCTACTTCCACAGCCCGTGCTTTGTCAAATTGTTTTCCATTCATAGTAGCATCGGGGTGGCCAGCAACAAAGGTCGTGTTTGTTTGGTAGTTCTTAATATTACAACCTTTGTGATTTCCAACATTCCATCCTCGCTGGGACACGTCATAAGCTATATTTCCAAGCCAGCTGCC…	1530	5845	KX122023.1 Suakwa aphid-borne yellows virus isolate DL76, complete genome
TRINITY_DN1185_c0_g2_i1	JQ700307.1	75.588	680	160	2	802	1475	4882	4203	7.69e-133	475	JQ700307.1	526	514	514	6	75.59	1	-1	GGTTCAGGGGTAGACCACGTCATTGCCCCCTTGCGTGGT---ATTCTTCTTGGCTCGTTCCCATTA---TTATCTTCGTCGATTGATACCGAGATTGCCCCCCACTCGCAATATTTCTCCGTGTAATTCCCGTATGAAACGGTGTAATTATATGAAGAATCCTTCTGTATAGGGGGGGGGTATATAGCCCAGCTTCCTTCCTCATCATCACATTCTAATTCGAAGGAAGCGGACCAATCGACTTCAACGGCCCGCGCAGTGTCAAAACTTTTACCATTCATTGTTGCGTCGGGATGTCCTGCCACAAAAGCTGTGTTAGATTGGTAATTTGTGATTTTACAGCCTTTGTAATTTCCTATATTCCAACCTCTTTGAGAAACATCGTAAGCGATATTTCCA…	GGCTCGGGCGTTGACCACGTCATTACCCCCTTACGTGGTTTAATTCTTTGTGGCACCCTCCCTGTGGCGTTGTCCTCATCAATAGAGATGGAAACGGCTCCCCATTCACAGTATTTCTCTGTGTAGTTTCCGTACGAGACAGTGTAATTATACGAACTGTCCTTCTGTATGGGGGGAGGATAGATCCTCCAACTGCCTTCGTCATCATCACATTCTAGTTCAAATGAGGCGAACCAATCAACTTCCACTGCCCTAGCCGCATCAAAGTTCTTTCCATTCATGGATGCGTCAGGGTGTCCAGCTACAAAGGTCGTTTTCGACTGATAGTTCTTTATGCTGCAACCTTTGTAATTCCCAATATTCCAACCTCGCTGGGATACATCATACGCGATGTTTCCA…	1530	5676	JQ700307.1 Melon aphid-borne yellows virus isolate MABYV-TW1, complete genome
TRINITY_DN1185_c0_g2_i1	JQ700307.1	88	75	8	1	1	75	5675	5602	3.29e-17	91.5	JQ700307.1	100	66	66	1	88	1	-1	CACCGAAACGCCAGGGGGAATCCCCCTGTTTCCACATGAGTGGGAACGTTCGTTGCCTATCCTTTCGGAGTCGTT	CACCGAAATGCCAGGGG-AGTCCCCCTGTACTCACAAGAGTGAGAACATTCGTTGCCTATCCTTTCGGAGTCGTT	1530	5676	JQ700307.1 Melon aphid-borne yellows virus isolate MABYV-TW1, complete genome
TRINITY_DN1185_c0_g2_i1	NC_010809.1	75.294	680	162	3	802	1475	4879	4200	1.69e-128	461	NC_010809.1	510	512	512	6	75.29	1	-1	GGTTCAGGGGTAGACCACGTCATTGCCCCCTTGCGTGGTAT--TCTTCT-TGGCTCGTTCCCATTA---TTATCTTCGTCGATTGATACCGAGATTGCCCCCCACTCGCAATATTTCTCCGTGTAATTCCCGTATGAAACGGTGTAATTATATGAAGAATCCTTCTGTATAGGGGGGGGGTATATAGCCCAGCTTCCTTCCTCATCATCACATTCTAATTCGAAGGAAGCGGACCAATCGACTTCAACGGCCCGCGCAGTGTCAAAACTTTTACCATTCATTGTTGCGTCGGGATGTCCTGCCACAAAAGCTGTGTTAGATTGGTAATTTGTGATTTTACAGCCTTTGTAATTTCCTATATTCCAACCTCTTTGAGAAACATCGTAAGCGATATTTCCA…	GGCTCGGGCGTTGACCACGTCATTACCCCCTTACGTGGTTTAATTTTCTGTGGCACCCTCCCTGTGGCGTTGTCCTCATCAATAGAGATGGAAACGGCTCCCCATTCACAGTATTTTTCTGTGTAGTTTCCGTACGAGACAGTGTAATTATATGAACTGTCCTTCTGTATGGGGGGAGGATAAATCCTCCAACTGCCTTCGTCATCATCACATTCTAGTTCAAATGAGGCGAACCAATCAACTTCCACTGCCCTGGCTGCATCAAAGTTCTTTCCATTCATGGATGCGTCAGGGTGTCCAGCTACAAAGGTCGTTTTCGATTGATAGTTCTTTATGCTGCAACCTTTGTAATTCCCAATATTCCAACCGCGCTGGGATACATCATACGCGATGTTTCCA…	1530	5674	NC_010809.1 Melon aphid-borne yellows virus, complete genome
TRINITY_DN1185_c0_g2_i1	NC_010809.1	89.333	75	8	0	1	75	5673	5599	6.35e-20	100	NC_010809.1	110	67	67	0	89.33	1	-1	CACCGAAACGCCAGGGGGAATCCCCCTGTTTCCACATGAGTGGGAACGTTCGTTGCCTATCCTTTCGGAGTCGTT	CACCGAAATGCCAGGGGGAGTCCCCCTGTACTCACAAGAGTGAGAACATTCGTTGCCTATCCTTTCGGAGTCGTT	1530	5674	NC_010809.1 Melon aphid-borne yellows virus, complete genome
[truncated: 1,186 more rows]

## Sheet: SSCF2A without host filtering
Supplementary Data Sheet 7: BlastN results from dsRNA library sequencing
[truncated: 6,541 more rows]

## Sheet: MRCP1 without host filtering
Supplementary Data Sheet 7: BlastN results from dsRNA library sequencing
[truncated: 3,767 more rows]

[truncated: 7 more sheets: MRCP6 without host filtering, MRDW2 without host filtering, SSDW2A without host filtering, Pepper-1 filtered by Cmaxima, Pepper-1 filtered by tomato , Pepper-2 filtered by Cmaxima, Pepper-2 filtered by tomato]
